# Supplementary material for: Wt1+/Itga4+ progenitors drive epicardial-derived cell expansion via non-canonical Wnt signalling
Source: Research Square preprint supplement (doi:10.21203/rs.3.rs-4842079/v1), 2024-08-07
Supplement: Supplementary file 1 [file Source_data.xlsx]

## Sheet: Figure 2 h
Figure 2 h
		% Yfp/Itga4 cells in E9.5 sections
		64.3
		57.1
		81.8
		66.7
		70
		40

## Sheet: Figure 2 l
Figure 2 l
		% Yfp/Itga4 cells
		Epicardium	Subepicardium
		30	87
		45.5	77.4
		45	88.2
		21.4	87.8
		46.2	89.3

## Sheet: Figure 3 b,c
Figure 3 b, c			%Wt1/EdU cells				%Wt1/EdU/Itga4 cells
			Epicardium	Subepicardium	Intramyocardial		Epicardium	Subepicardium	Intramyocardial
			12.9	45	33.3		61.5	75.8	12.5
			18.3	52.2	60		34.4	77.3	50
			14	41.5	46.4		58.3	94.4	23.1
			10.8	36.1	48.4		36.4	85.9	53.3
			14.2	42.7	33.3		60	83.9	50
			15.3	38.8	68.2		45.8	92.5	53.3
			19.8	45.4	50		81.8	92.1	66.7
			15.8	32.3	46.7		57.9	92.7	71.4
			17.3	48.8	40		50	89.7	50

## Sheet: Figure 3 g
Figure 3 g
		%Wt1 cells in the subepicardium
		E11.5 t0	E12.5	Vehicel 24h	Nocodazole 24h
		9.4	33.3	33.8	35.9
		17.7	26.1	40.1	37
		17.4	29.7	31.5	34.9
		18.2	44.7	31.8	27.7
			46	38	33.3
			47
			32
			43.8
			37.5
				0	0
					#DIV/0!

## Sheet: Figure 3 j
Figure 3 j
		%YFP cells in the subepicardium
		20	40
		36.4	29
		43.8	32.4
		28.6	41.9
		35.9	20

## Sheet: Figure 4 d, i
Figure 4 d, i
		% CJUN cells			% CJUN/EdU cells
		Epicardium	Subepicardium		Epicardium	Subepicardium
		26.7	76		25	52.6
		44.4	78.6		0	34.1
		29	71.4		22.2	23.3
		48	74		0	42.9
		52	100		0	66.7
		40	97.1		83.2	33.3

## Sheet: Figure 4 g,k
Figure 4 g, k
		% Itga4/Ror2 cells			% Itga4/Ror2/EdU cells
		Epicardium	Subepicardium		Epicardium	Subepicardium
		40.7	53.6		57.1	81.8
		38.1	64.5		40	70.4
		33.3	74.6		33.3	76.2
		60	82.3		75	87.5
		50	71.7		80	77.8
		45.5	65.8		53.3	70.7
		30	79.2		40	79.2
		53.3	71.6		50	76.5

## Sheet: Figure 4 l
Figure 4 l		In red, graph raw data
	Sample	Time	FBS	Condition	Dapi	BrdU	% BrdU
	E11.5	24h	0.01	Vehicle + 1h BrdU	3950	620	15.6962
	E11.5	24h	0.01	Vehicle + 1h BrdU	1218	211	17.3235
	E11.5	24h	0.01	Vehicle + 1h BrdU	9607	1403	14.6039
	E11.5	24h	0.01	Vehicle + 1h BrdU	6623	749	11.3091
	E11.5	24h	0.01	Vehicle + 1h BrdU	3541	450	12.7083
	E11.5	24h	0.01	Vehicle + 1h BrdU	4731	827	17.4804
	E11.5	24h	0.01	Vehicle + 1h BrdU	3039	429	14.1165
	E11.5	24h	0.01	Vehicle + 1h BrdU	8371	1352	16.151
	Sample	Time	FBS	Condition	Dapi	BrdU	% BrdU
	E11.5	24h	0.01	100 ng/mL Wnt5a+ 1h BrdU	16154	3073	19.0232
	E11.5	24h	0.01	101 ng/mL Wnt5a+ 1h BrdU	9373	1374	14.6591
	E11.5	24h	0.01	102 ng/mL Wnt5a+ 1h BrdU	2773	765	27.5875
	E11.5	24h	0.01	103 ng/mL Wnt5a+ 1h BrdU	4343	985	22.6802
	E11.5	24h	0.01	104 ng/mL Wnt5a+ 1h BrdU	4037	727	18.0084
	E11.5	24h	0.01	105 ng/mL Wnt5a+ 1h BrdU	2246	364	16.2066
	E11.5	24h	0.01	106 ng/mL Wnt5a+ 1h BrdU	1902	357	18.7697
	E11.5	24h	0.01	107 ng/mL Wnt5a+ 1h BrdU	3775	926	24.5298

## Sheet: Figure 4 m
Figure 4 m		Original western blot membranes

## Sheet: Figure S6 b
Supplementary Figure S6 b
				Beating gastruloids (%)
		Day 7	28.5	79.1	27.6
		Day 10	46.7	98.6	53.8

[truncated: 9 more sheets: Figure S6 c, Figure S8 d, Figure S12 d, Figure S13 c, Figure S13 d, Figure S13 g, Figure S14 e, Figure S15 b, Figure S15 e]
