# Supplementary material for: Wt1+/Itga4+ progenitors drive epicardial-derived cell expansion via non-canonical Wnt signalling
Source: Research Square preprint supplement (doi:10.21203/rs.3.rs-4842079/v1), 2024-08-07
Supplement: Supplementary file 6 [file Suppl. dataset 1_DEGs_filtered.xlsx]

## Sheet: Suppl. List 1_DEGs_filtered
Supplemental dataset 1. Differential gene expression analysis of clusters 0-12 from scRNA-seq on the posterior part of the cardiac inflow.
gene	p_val	avg_log2FC	pct.1	pct.2	p_val_adj	cluster	cluster name
Col1a1	0	2.6778	0.869	0.398	0	0	STMI
Alcam	0	2.6117	0.93	0.492	0	0	STMI
Col1a2	0	2.52641	0.921	0.451	0	0	STMI
Col3a1	0	2.08749	0.964	0.62	0	0	STMI
Plagl1	0	2.08145	0.982	0.629	0	0	STMI
Asb4	0	2.06094	0.966	0.652	0	0	STMI
Robo2	0	1.87833	0.78	0.376	0	0	STMI
Hand2os1	0	1.74708	0.75	0.29	0	0	STMI
Ptn	0	1.72568	0.999	0.78	0	0	STMI
Capn6	0	1.65932	0.783	0.409	0	0	STMI
Itm2a	0	1.63636	0.945	0.679	0	0	STMI
Tgfb2	0	1.54494	0.877	0.536	0	0	STMI
Mfap4	0	1.52685	0.759	0.366	0	0	STMI
Hand2	0	1.47563	0.92	0.527	0	0	STMI
Nrp1	0	1.46113	0.898	0.564	0	0	STMI
Col5a2	0	1.42591	0.809	0.513	0	0	STMI
Map1b	0	1.39755	0.983	0.77	0	0	STMI
Lgals1	0	1.39207	0.99	0.838	0	0	STMI
Phactr2	0	1.38286	0.803	0.452	0	0	STMI
Pmp22	0	1.36576	0.906	0.507	0	0	STMI
6330403K07Rik	0	1.31138	0.95	0.642	0	0	STMI
Nfib	0	1.3066	0.868	0.587	0	0	STMI
Dlk1	0	1.26912	0.999	0.814	0	0	STMI
Gata6	0	1.26559	0.979	0.722	0	0	STMI
Runx1t1	0	1.25761	0.847	0.5	0	0	STMI
Maged2	0	1.17102	0.975	0.767	0	0	STMI
Pbx3	0	1.1498	0.834	0.619	0	0	STMI
Ece1	3.14917e-292	1.14393	0.775	0.489	5.83415e-288	0	STMI
Dsp	7.77022e-250	1.12431	0.8	0.576	1.43951e-244	0	STMI
Meg3	0	1.10289	0.999	0.886	0	0	STMI
Cdkn1c	4.61226e-269	1.10179	0.981	0.935	8.54467e-265	0	STMI
Mfap2	0	1.09449	0.971	0.774	0	0	STMI
Ugdh	2.18616e-269	1.09097	0.781	0.529	4.05009e-265	0	STMI
Nr2f1	6.94971e-246	1.06115	0.77	0.506	1.2875e-241	0	STMI
Gata4	0	1.0369	0.829	0.522	0	0	STMI
Amer1	1.4004e-231	1.03419	0.757	0.491	2.59437e-227	0	STMI
Cdh2	1.36473e-233	1.00629	0.807	0.581	2.5283e-229	0	STMI
Sfrp1	0	0.969305	0.932	0.691	0	0	STMI
Rhoc	0	0.921774	0.978	0.797	0	0	STMI
Rian	0	0.91461	0.932	0.675	0	0	STMI
Gpx3	1.70848e-268	0.882179	0.831	0.574	3.16514e-264	0	STMI
Nr2f2	0	0.877689	0.944	0.815	0	0	STMI
Peg10	0	0.870038	0.965	0.825	0	0	STMI
Abcg2	1.03679e-131	0.862689	0.751	0.606	1.92076e-127	0	STMI
Peg3	0	0.857145	1	0.989	0	0	STMI
Nnat	0	0.83748	0.991	0.846	0	0	STMI
Bambi	0	0.833337	0.962	0.799	0	0	STMI
Resf1	1.61564e-249	0.822211	0.912	0.739	2.99313e-245	0	STMI
Tpm1	0	0.810985	1	0.949	0	0	STMI
Sparc	0	0.796768	0.999	0.892	0	0	STMI
Gpc3	0	0.796037	1	0.905	0	0	STMI
Map1lc3a	1.04924e-258	0.783221	0.921	0.749	1.94381e-253	0	STMI
F2r	1.49038e-192	0.781653	0.794	0.582	2.76107e-188	0	STMI
Gpc6	2.47521e-161	0.759528	0.784	0.57	4.58558e-156	0	STMI
Lmo4	1.28621e-145	0.751828	0.818	0.674	2.38284e-141	0	STMI
Jun	6.93169e-151	0.748951	0.856	0.706	1.28416e-146	0	STMI
Hoxb4	1.14436e-168	0.746558	0.814	0.588	2.12005e-164	0	STMI
Chd3	8.7588e-131	0.746014	0.752	0.559	1.62266e-126	0	STMI
Gpx8	3.83833e-172	0.733141	0.836	0.635	7.11089e-168	0	STMI
Hoxb2	6.41266e-144	0.7267	0.79	0.577	1.18801e-139	0	STMI
Usp29	5.45105e-136	0.717675	0.766	0.568	1.00986e-131	0	STMI
Rcn3	5.94279e-200	0.71667	0.933	0.824	1.10096e-195	0	STMI
Fn1	1.23446e-166	0.7127	0.932	0.855	2.28697e-161	0	STMI
Igf2r	1.04477e-217	0.712347	0.918	0.776	1.93555e-213	0	STMI
Gas1	5.56414e-147	0.711637	0.772	0.537	1.03081e-142	0	STMI
Flna	2.25655e-267	0.708976	0.954	0.849	4.18048e-263	0	STMI
Prrx2	9.86684e-227	0.702538	0.796	0.472	1.82793e-222	0	STMI
Fzd2	3.65376e-222	0.699916	0.927	0.752	6.76896e-219	0	STMI
Fstl1	1.17172e-202	0.684984	0.921	0.788	2.17074e-198	0	STMI
Igf2	0	0.6735	0.989	0.909	0	0	STMI
Sfr1	0	0.670438	0.999	0.995	0	0	STMI
Flrt3	2.94024e-140	0.666032	0.801	0.605	5.4471e-136	0	STMI
Vim	0	0.660248	0.999	0.858	0	0	STMI
Smad7	3.18988e-102	0.657044	0.751	0.605	5.90958e-98	0	STMI
Smim1	1.43997e-202	0.650061	0.77	0.456	2.6677e-198	0	STMI
Mmp14	6.39665e-105	0.649899	0.775	0.643	1.18504e-100	0	STMI
Ndfip1	3.28003e-242	0.641606	0.963	0.889	6.07657e-239	0	STMI
Sept7	0	0.64108	0.999	0.981	0	0	STMI
Atp2b1	4.24187e-226	0.640682	0.971	0.918	7.85849e-222	0	STMI
Dnmt3a	9.72095e-109	0.632936	0.797	0.665	1.8009e-104	0	STMI
Gabarap	0	0.6327	1	0.982	0	0	STMI
Plin3	1.33453e-133	0.628135	0.824	0.661	2.47236e-131	0	STMI
Tnni1	0	0.620208	0.909	0.49	0	0	STMI
2610001J05Rik	6.47427e-86	0.614764	0.75	0.625	1.19942e-81	0	STMI
Pdlim7	4.86779e-147	0.60721	0.867	0.72	9.01807e-143	0	STMI
Tuba1a	0	0.602092	1	0.981	0	0	STMI
Nenf	9.82828e-162	0.597163	0.917	0.818	1.82079e-157	0	STMI
Ndn	2.65639e-141	0.575322	0.944	0.814	4.92123e-137	0	STMI
Eid1	0	0.574103	1	0.989	0	0	STMI
Cnn2	1.23489e-140	0.572286	0.858	0.658	2.28775e-136	0	STMI
Add1	8.72519e-86	0.571326	0.769	0.638	1.61643e-80	0	STMI
Ilk	1.21247e-103	0.571	0.817	0.696	2.24623e-99	0	STMI
Serpinh1	0	0.55911	1	0.985	0	0	STMI
Clic1	2.31265e-281	0.55809	0.999	0.916	4.28441e-277	0	STMI
Maged1	7.36894e-255	0.551242	0.993	0.959	1.36517e-250	0	STMI
Igfbp4	1.26723e-235	0.548982	0.993	0.933	2.34766e-231	0	STMI
Colec12	3.4643e-80	0.548312	0.783	0.656	6.41796e-76	0	STMI
Vcan	1.89739e-94	0.544223	0.789	0.625	3.5151e-90	0	STMI
Marcks	0	0.536419	1	0.998	0	0	STMI
Ppic	6.97003e-152	0.534832	0.91	0.745	1.29127e-147	0	STMI
Barx1	0	4.7504	0.962	0.206	0	1	SHF
Isl1	0	3.35869	0.929	0.195	0	1	SHF
Ifitm1	0	2.64602	0.911	0.467	0	1	SHF
Tox3	0	2.61275	0.799	0.261	0	1	SHF
Tmem158	0	2.16987	0.767	0.305	0	1	SHF
Dpysl3	0	2.12923	0.879	0.39	0	1	SHF
Ptch1	0	2.12713	0.84	0.413	0	1	SHF
Foxf1	0	2.00269	0.968	0.43	0	1	SHF
Ccnd2	0	1.97362	0.995	0.846	0	1	SHF
Pdgfra	0	1.74283	0.862	0.485	0	1	SHF
Isoc1	0	1.53281	0.972	0.761	0	1	SHF
Fxyd6	5.32909e-227	1.26527	0.881	0.566	9.87267e-223	1	SHF
Cadm1	1.92767e-187	1.16965	0.802	0.451	3.57119e-183	1	SHF
Smco4	1.70783e-189	1.15115	0.871	0.631	3.16392e-189	1	SHF
Sox11	0	1.13069	0.999	0.928	0	1	SHF
Eno3	4.98788e-215	1.08326	0.912	0.611	9.24054e-211	1	SHF
Hsd11b2	8.75714e-194	1.06623	0.871	0.488	1.62235e-189	1	SHF
Meis1	3.29175e-162	0.983159	0.901	0.67	6.0983e-158	1	SHF
Stmn1	0	0.86226	1	0.998	0	1	SHF
Nrep	1.07457e-111	0.852206	0.842	0.608	1.99076e-107	1	SHF
Mfge8	2.54501e-75	0.852206	0.753	0.568	4.71488e-71	1	SHF
Htatsf1	1.33058e-93	0.827207	0.884	0.747	2.46503e-90	1	SHF
Ptbp2	3.15753e-104	0.780691	0.858	0.655	5.84964e-100	1	SHF
Rrm2	2.56465e-139	0.770035	0.97	0.826	4.75127e-135	1	SHF
Adgrl2	2.20379e-68	0.761258	0.771	0.577	4.08274e-64	1	SHF
Gm1673	3.45213e-184	0.75613	0.987	0.878	6.39541e-179	1	SHF
Nasp	0	0.738866	1	0.999	0	1	SHF
Hist1h1b	9.68969e-38	0.735295	0.815	0.68	1.79511e-33	1	SHF
Acvr2b	3.88811e-95	0.726307	0.869	0.675	7.20312e-91	1	SHF
H2afy2	1.24664e-187	0.721098	0.992	0.886	2.30952e-185	1	SHF
Psip1	2.18689e-259	0.710265	0.999	0.984	4.05144e-256	1	SHF
Sinhcaf	3.10906e-134	0.704765	0.968	0.86	5.75984e-129	1	SHF
Ccdc34	2.23463e-185	0.6979	0.993	0.943	4.13988e-181	1	SHF
Cd24a	1.09762e-216	0.692603	1	0.905	2.03345e-212	1	SHF
Sms	4.46453e-155	0.689759	0.989	0.907	8.27099e-151	1	SHF
Pcbp4	1.58787e-138	0.677552	0.976	0.89	2.94169e-134	1	SHF
Gpc6	5.51587e-58	0.670498	0.803	0.605	1.02187e-53	1	SHF
Ezh2	1.62959e-166	0.635799	0.994	0.96	3.01898e-162	1	SHF
Rcc2	2.07396e-167	0.634433	0.995	0.948	3.84221e-164	1	SHF
Atad2	3.39517e-61	0.634101	0.871	0.724	6.2899e-57	1	SHF
Ptprs	3.8396e-69	0.633047	0.87	0.737	7.11323e-65	1	SHF
Zfp422	1.51268e-85	0.630206	0.915	0.765	2.80239e-81	1	SHF
Auts2	1.08795e-72	0.62113	0.909	0.815	2.01553e-68	1	SHF
Nsd2	1.76884e-63	0.620858	0.879	0.769	3.27696e-59	1	SHF
Ndn	5.4942e-92	0.61798	0.961	0.835	1.01785e-87	1	SHF
Cenph	3.09885e-53	0.615118	0.807	0.641	5.74094e-49	1	SHF
Clspn	3.62733e-40	0.612357	0.759	0.579	6.71999e-36	1	SHF
Ctxn1	2.5629e-73	0.61185	0.898	0.729	4.74802e-69	1	SHF
Meis2	7.6432e-99	0.603236	0.968	0.814	1.41598e-94	1	SHF
Sap30	1.66125e-48	0.597	0.806	0.661	3.07764e-44	1	SHF
Tshz2	1.5558e-77	0.592878	0.873	0.652	2.88227e-73	1	SHF
Zbtb12	1.53053e-45	0.587058	0.792	0.635	2.83546e-42	1	SHF
Pclaf	7.43641e-165	0.582531	0.999	0.976	1.37767e-160	1	SHF
Hdgfl3	4.87153e-50	0.57434	0.825	0.653	9.025e-46	1	SHF
Smarcd1	9.7937e-62	0.565542	0.886	0.774	1.81438e-57	1	SHF
Hist1h2ap	4.08427e-26	0.565324	0.81	0.697	7.56651e-22	1	SHF
Dut	3.69645e-151	0.562775	0.999	0.982	6.84804e-147	1	SHF
Smchd1	2.33781e-81	0.562718	0.946	0.873	4.33102e-77	1	SHF
Casp3	2.24518e-43	0.562497	0.819	0.682	4.15942e-39	1	SHF
Hmgb3	1.28392e-217	0.560365	1	0.995	2.37858e-213	1	SHF
Mapk3	1.21073e-56	0.559529	0.871	0.722	2.243e-52	1	SHF
Hoxb4	1.65046e-49	0.558848	0.824	0.627	3.05763e-45	1	SHF
Chaf1a	5.47618e-36	0.554453	0.793	0.65	1.01452e-31	1	SHF
Zfp462	2.9373e-38	0.548066	0.756	0.592	5.44164e-34	1	SHF
Cdca7	2.32062e-53	0.546344	0.869	0.743	4.29917e-49	1	SHF
Chd7	1.9424e-47	0.544815	0.861	0.735	3.5985e-43	1	SHF
Baz2b	2.73783e-44	0.544772	0.848	0.712	5.0721e-40	1	SHF
Ptma	0	0.544557	1	1	0	1	SHF
Rab34	2.43547e-53	0.543361	0.869	0.721	4.51195e-49	1	SHF
Fbn2	5.7092e-56	0.543272	0.889	0.734	1.05769e-51	1	SHF
Uhrf1	1.34699e-44	0.539675	0.899	0.78	2.49543e-41	1	SHF
Anp32e	4.66624e-124	0.539383	0.994	0.973	8.64468e-121	1	SHF
Dnajc9	2.073e-81	0.538432	0.952	0.863	3.84043e-77	1	SHF
Gng12	1.88744e-29	0.536733	0.793	0.667	3.49667e-25	1	SHF
Ralgps2	5.73651e-31	0.531909	0.751	0.61	1.06275e-25	1	SHF
Tubb2b	1.05416e-76	0.531514	0.963	0.793	1.95294e-72	1	SHF
Prdx6	1.02192e-142	0.526555	1	0.977	1.89321e-137	1	SHF
Btg1	2.22187e-32	0.526434	0.781	0.655	4.11624e-28	1	SHF
Dcakd	2.88124e-98	0.525879	0.979	0.928	5.33778e-94	1	SHF
Smarcc1	7.98269e-110	0.52426	0.996	0.974	1.47887e-105	1	SHF
Slc38a1	2.10124e-36	0.512734	0.848	0.743	3.89276e-33	1	SHF
Cbx1	9.01972e-197	0.508531	1	0.999	1.67099e-192	1	SHF
Cdk2ap1	1.20565e-93	0.508421	0.985	0.93	2.23359e-89	1	SHF
Paics	2.57403e-102	0.504243	0.983	0.951	4.76866e-97	1	SHF
Vezf1	2.57017e-41	0.504216	0.845	0.723	4.7615e-37	1	SHF
Lig1	2.32039e-54	0.503047	0.934	0.83	4.29875e-50	1	SHF
Fen1	2.77724e-31	0.502946	0.793	0.66	5.14512e-27	1	SHF
Mcm7	1.13837e-74	0.501194	0.978	0.903	2.10895e-69	1	SHF
H1fx	2.51789e-77	0.499346	0.984	0.9	4.66464e-72	1	SHF
Supt16	1.21004e-102	0.498102	0.993	0.981	2.24173e-98	1	SHF
Igf1r	8.47502e-28	0.497183	0.775	0.65	1.57008e-23	1	SHF
Dek	4.22006e-158	0.49623	0.999	0.994	7.81809e-154	1	SHF
Gjc1	1.58099e-41	0.493867	0.859	0.738	2.92895e-37	1	SHF
Dhfr	1.54199e-36	0.489692	0.852	0.716	2.8567e-32	1	SHF
Hirip3	1.19531e-22	0.487538	0.769	0.655	2.21443e-18	1	SHF
Ppa1	6.6582e-88	0.48432	0.987	0.927	1.2335e-83	1	SHF
Mbtd1	2.54134e-27	0.483701	0.783	0.669	4.70808e-23	1	SHF
Pcna	1.37188e-57	0.483067	0.97	0.903	2.54155e-53	1	SHF
Acat2	1.699e-31	0.482003	0.831	0.702	3.14756e-27	1	SHF
Ilf2	5.28704e-98	0.473419	0.988	0.964	9.79477e-94	1	SHF
Fgb	0	7.27506	0.896	0.055	0	2	HEP
Apoa2	0	7.0704	0.95	0.118	0	2	HEP
Fgg	0	6.84161	0.821	0.025	0	2	HEP
Paqr9	0	6.72463	0.895	0.028	0	2	HEP
Itih2	0	6.7124	0.933	0.052	0	2	HEP
Afp	0	6.52475	0.993	0.408	0	2	HEP
Serpinf2	0	6.42258	0.911	0.057	0	2	HEP
Trf	0	6.28035	0.843	0.074	0	2	HEP
Reln	0	5.91736	0.851	0.056	0	2	HEP
Ambp	0	5.64036	0.954	0.093	0	2	HEP
Ttr	0	5.41329	0.998	0.192	0	2	HEP
Serpina1a	0	5.15487	0.893	0.059	0	2	HEP
Serpina1b	0	5.11166	0.875	0.058	0	2	HEP
Cited1	0	4.8723	0.963	0.148	0	2	HEP
Vtn	0	4.77758	0.925	0.071	0	2	HEP
Spink1	0	4.692	0.796	0.048	0	2	HEP
Prox1	0	4.53859	0.771	0.078	0	2	HEP
Apoa1	0	4.38272	0.831	0.065	0	2	HEP
Apoc1	0	4.15078	0.763	0.111	0	2	HEP
Hhex	0	4.0117	0.919	0.114	0	2	HEP
Cpn1	0	3.86077	0.829	0.058	0	2	HEP
Gstm1	0	3.85522	0.928	0.248	0	2	HEP
Espn	0	3.66273	0.83	0.086	0	2	HEP
Rbp4	0	3.58016	0.968	0.24	0	2	HEP
Apoe	0	3.48136	0.997	0.688	0	2	HEP
Pcbd1	0	3.44215	0.979	0.304	0	2	HEP
Stard10	0	3.40587	0.957	0.277	0	2	HEP
Psph	0	3.19295	0.942	0.381	0	2	HEP
Dusp9	0	2.82632	0.997	0.574	0	2	HEP
Fkbp11	0	2.76964	0.835	0.317	0	2	HEP
Car4	0	2.62181	0.79	0.167	0	2	HEP
Bex1	0	2.58911	1	0.918	0	2	HEP
Psmb10	0	2.55765	0.827	0.335	0	2	HEP
Glud1	0	2.47166	0.955	0.652	0	2	HEP
Cldn6	0	2.46086	0.848	0.14	0	2	HEP
Bex4	0	2.4551	1	0.918	0	2	HEP
Ccnd1	0	2.3346	0.999	0.703	0	2	HEP
Emb	0	2.33115	0.92	0.422	0	2	HEP
Serpinf1	0	2.32344	0.892	0.386	0	2	HEP
Psat1	0	2.26307	0.959	0.544	0	2	HEP
Phgdh	0	2.2535	0.997	0.727	0	2	HEP
Acer2	0	2.15205	0.773	0.235	0	2	HEP
Ddah1	0	2.15113	0.83	0.339	0	2	HEP
Nipsnap1	0	2.10118	0.942	0.513	0	2	HEP
Chchd10	0	2.04778	0.913	0.225	0	2	HEP
Ddt	0	2.02049	1	0.886	0	2	HEP
Pla2g12a	0	1.98024	0.983	0.552	0	2	HEP
1190007I07Rik	2.62789e-279	1.926	0.771	0.335	4.86844e-275	2	HEP
Shmt1	0	1.92495	0.841	0.366	0	2	HEP
Gamt	4.37508e-290	1.86562	0.816	0.372	8.10527e-288	2	HEP
Gcat	0	1.85241	0.875	0.446	0	2	HEP
Sephs2	0	1.80955	0.849	0.449	0	2	HEP
Raph1	1.59937e-254	1.77517	0.847	0.52	2.963e-250	2	HEP
Epcam	0	1.76338	0.897	0.228	0	2	HEP
Spint2	0	1.75569	0.919	0.323	0	2	HEP
Fabp5	0	1.7437	1	0.997	0	2	HEP
Tle5	0	1.71556	0.999	0.81	0	2	HEP
Dlk1	0	1.69593	1	0.85	0	2	HEP
Got2	0	1.64611	0.988	0.817	0	2	HEP
B2m	3.21862e-275	1.62902	0.896	0.554	5.96282e-271	2	HEP
Mt1	1.66002e-219	1.59898	0.76	0.36	3.07535e-215	2	HEP
Ccne1	1.2471e-226	1.56655	0.851	0.469	2.31037e-222	2	HEP
Lpl	5.81251e-223	1.55143	0.822	0.439	1.07683e-218	2	HEP
Rian	1.51075e-288	1.547	0.97	0.722	2.79882e-284	2	HEP
Snhg4	1.8431e-180	1.54159	0.775	0.429	3.41453e-176	2	HEP
Bex2	0	1.47902	0.997	0.931	0	2	HEP
Mtln	1.14751e-199	1.46967	0.793	0.432	2.12588e-195	2	HEP
Tmem97	1.53726e-190	1.41072	0.849	0.554	2.84793e-187	2	HEP
Slc9a3r1	1.28146e-256	1.38545	0.923	0.508	2.37404e-252	2	HEP
Meg3	1.7144e-242	1.36473	0.993	0.909	3.1761e-238	2	HEP
Nadk2	1.7067e-146	1.31671	0.754	0.429	3.16182e-142	2	HEP
Ldhb	7.31114e-235	1.30269	0.98	0.837	1.35446e-230	2	HEP
Dap	1.99375e-241	1.28888	0.929	0.65	3.69361e-237	2	HEP
Sdf2l1	6.03024e-164	1.28073	0.849	0.586	1.11716e-159	2	HEP
Lsr	1.31379e-149	1.25963	0.758	0.402	2.43393e-145	2	HEP
Grhpr	4.80572e-185	1.22338	0.883	0.592	8.90308e-181	2	HEP
Pgk1	0	1.21959	1	0.997	0	2	HEP
Tfrc	4.70752e-145	1.2142	0.817	0.555	8.72115e-141	2	HEP
Eci1	1.93934e-150	1.20724	0.815	0.522	3.59283e-147	2	HEP
Cald1	0	1.19879	0.997	0.972	0	2	HEP
Gstp1	1.16624e-119	1.17871	0.753	0.477	2.16058e-114	2	HEP
Nipsnap2	1.27183e-124	1.17069	0.753	0.464	2.35619e-120	2	HEP
Mettl26	1.93003e-119	1.13115	0.764	0.469	3.57558e-115	2	HEP
Galk1	0	1.11001	0.996	0.908	0	2	HEP
Hadh	4.5633e-276	1.10499	0.985	0.875	8.45397e-272	2	HEP
Mpc2	4.38634e-211	1.09852	0.955	0.801	8.12614e-207	2	HEP
Srm	2.60226e-209	1.09239	0.975	0.84	4.82095e-205	2	HEP
Trim71	7.05778e-114	1.08797	0.769	0.483	1.30752e-109	2	HEP
Lyar	1.80491e-267	1.0472	0.997	0.917	3.34378e-263	2	HEP
Nop10	0	1.04625	1	0.986	0	2	HEP
Snhg3	4.71507e-132	1.04357	0.913	0.728	8.73513e-128	2	HEP
Pgm1	6.21258e-134	1.04053	0.856	0.571	1.15094e-128	2	HEP
Timm8a1	3.47235e-183	1.02006	0.961	0.78	6.43287e-179	2	HEP
Mrpl36	1.68228e-172	0.981414	0.95	0.765	3.11659e-168	2	HEP
Idh3a	4.12442e-105	0.976694	0.822	0.589	7.6409e-101	2	HEP
Ankrd17	2.84615e-112	0.966148	0.919	0.807	5.27277e-108	2	HEP
Hprt	1.3483e-130	0.959115	0.881	0.624	2.49785e-126	2	HEP
Emc6	1.19285e-265	0.95367	0.996	0.921	2.20988e-262	2	HEP
Exosc7	2.87281e-165	0.95202	0.949	0.757	5.32217e-161	2	HEP
Zfp706	0	0.949364	0.997	0.978	0	2	HEP
Cdh5	0	7.52154	0.995	0.025	0	3	ECI
Cd93	0	7.3992	0.953	0.014	0	3	ECI
Pde2a	0	7.2315	0.853	0.01	0	3	ECI
Cldn5	0	7.01329	0.971	0.03	0	3	ECI
Tie1	0	6.96828	0.888	0.015	0	3	ECI
Flt4	0	6.93032	0.809	0.013	0	3	ECI
Clec14a	0	6.72729	0.894	0.021	0	3	ECI
Kdr	0	6.6202	0.996	0.063	0	3	ECI
Stab1	0	6.5774	0.841	0.016	0	3	ECI
Esam	0	6.52075	0.971	0.029	0	3	ECI
Pecam1	0	6.51726	0.942	0.025	0	3	ECI
Aplnr	0	6.48243	0.897	0.019	0	3	ECI
Icam2	0	6.45767	0.961	0.025	0	3	ECI
Emcn	0	6.44382	0.988	0.033	0	3	ECI
Gimap6	0	6.38342	0.921	0.019	0	3	ECI
Cd34	0	6.36231	0.976	0.036	0	3	ECI
She	0	6.35642	0.871	0.019	0	3	ECI
Eng	0	6.34325	0.956	0.033	0	3	ECI
Fxyd5	0	6.17972	0.861	0.021	0	3	ECI
Gimap1	0	6.16812	0.774	0.013	0	3	ECI
Adgrf5	0	6.16303	0.799	0.021	0	3	ECI
Mmrn2	0	6.15505	0.83	0.024	0	3	ECI
Sox18	0	6.11218	0.955	0.026	0	3	ECI
Arhgef15	0	6.02535	0.752	0.016	0	3	ECI
Gngt2	0	5.94345	0.946	0.036	0	3	ECI
Ctla2a	0	5.87177	0.933	0.026	0	3	ECI
Rasip1	0	5.85633	0.984	0.045	0	3	ECI
Plvap	0	5.84731	0.999	0.103	0	3	ECI
Plxnd1	0	5.82393	0.982	0.071	0	3	ECI
Grap	0	5.79931	0.758	0.016	0	3	ECI
Lmo2	0	5.5477	0.922	0.035	0	3	ECI
S100a16	0	5.43692	0.904	0.072	0	3	ECI
Rhoj	0	5.34988	0.879	0.044	0	3	ECI
Ramp2	0	5.24479	1	0.244	0	3	ECI
Fli1	0	5.21922	0.899	0.055	0	3	ECI
Exoc3l4	0	5.09576	0.798	0.037	0	3	ECI
Vamp5	0	5.08359	0.966	0.076	0	3	ECI
Ecscr	0	5.07718	0.986	0.098	0	3	ECI
Fgd5	0	5.01127	0.754	0.035	0	3	ECI
Arap3	0	5.00841	0.831	0.047	0	3	ECI
Flt1	0	4.96432	0.959	0.074	0	3	ECI
Klf2	0	4.86213	0.779	0.114	0	3	ECI
Sgk1	0	4.74518	0.888	0.094	0	3	ECI
Gmfg	0	4.65169	0.757	0.036	0	3	ECI
Gm16104	0	4.62486	0.779	0.05	0	3	ECI
Tgfb1	0	4.56717	0.951	0.093	0	3	ECI
Smagp	0	4.4333	0.869	0.07	0	3	ECI
Myzap	0	4.27746	0.82	0.064	0	3	ECI
Slc29a1	0	4.13296	0.862	0.099	0	3	ECI
Afap1l1	0	4.07993	0.829	0.084	0	3	ECI
Elk3	0	4.06526	0.968	0.177	0	3	ECI
Ptpn18	0	3.95261	0.759	0.07	0	3	ECI
Tek	0	3.90432	0.844	0.096	0	3	ECI
Egfl7	0	3.81917	0.999	0.547	0	3	ECI
Notch1	0	3.74028	0.842	0.119	0	3	ECI
Rasgrp2	0	3.71994	0.827	0.077	0	3	ECI
Pcdh17	0	3.66186	0.806	0.116	0	3	ECI
Ldb2	0	3.6527	0.849	0.12	0	3	ECI
Gchfr	0	3.63131	0.806	0.108	0	3	ECI
Tspan18	0	3.61576	0.889	0.143	0	3	ECI
Gng11	0	3.602	0.998	0.436	0	3	ECI
Gap43	0	3.58199	0.99	0.351	0	3	ECI
Crip2	0	3.53048	1	0.388	0	3	ECI
Col4a1	0	3.47769	0.997	0.455	0	3	ECI
Igf1	0	3.46648	0.865	0.133	0	3	ECI
H2-D1	0	3.44409	0.887	0.198	0	3	ECI
Ehd2	0	3.42143	0.814	0.128	0	3	ECI
Col4a2	0	3.41342	0.978	0.291	0	3	ECI
Cavin3	0	3.36294	0.926	0.226	0	3	ECI
S100a13	0	3.36058	0.881	0.151	0	3	ECI
Cemip2	0	3.31294	0.881	0.321	0	3	ECI
Tcim	0	3.206	0.773	0.182	0	3	ECI
Crmp1	0	3.08379	0.833	0.146	0	3	ECI
Ets2	0	3.06393	0.888	0.232	0	3	ECI
Limch1	0	3.01748	0.874	0.188	0	3	ECI
Upp1	0	2.9507	0.757	0.101	0	3	ECI
Inka1	0	2.93595	0.798	0.142	0	3	ECI
Arpc1b	0	2.86529	0.99	0.426	0	3	ECI
Sipa1	0	2.8521	0.856	0.225	0	3	ECI
Tagln2	0	2.8464	0.997	0.618	0	3	ECI
Cmtm8	0	2.81281	0.951	0.264	0	3	ECI
Rasgrp3	0	2.81242	0.844	0.207	0	3	ECI
Hspg2	0	2.79688	0.955	0.338	0	3	ECI
Anxa3	0	2.73768	0.878	0.245	0	3	ECI
Hapln1	0	2.71865	0.93	0.263	0	3	ECI
Itga6	0	2.67718	0.895	0.222	0	3	ECI
Cd59a	0	2.67428	0.893	0.347	0	3	ECI
Ipo11	0	2.66491	0.972	0.379	0	3	ECI
Sh3bp5	0	2.62326	0.851	0.254	0	3	ECI
Msn	0	2.56027	0.991	0.621	0	3	ECI
Ets1	0	2.55407	0.944	0.359	0	3	ECI
Snrk	0	2.53654	0.752	0.212	0	3	ECI
Ccdc85b	0	2.45365	0.998	0.662	0	3	ECI
Ostf1	0	2.41888	0.782	0.203	0	3	ECI
Arhgap31	0	2.40416	0.869	0.263	0	3	ECI
Tpst2	0	2.40359	0.781	0.228	0	3	ECI
Arhgdib	0	2.38805	0.855	0.281	0	3	ECI
Nid1	0	2.36843	0.891	0.303	0	3	ECI
Klk8	0	2.31972	0.822	0.263	0	3	ECI
Cotl1	0	2.20794	0.992	0.606	0	3	ECI
Nkx2-3	0	5.3073	0.801	0.039	0	4	JCF
Lgi2	0	2.68824	0.774	0.182	0	4	JCF
Rragd	0	2.28561	0.816	0.256	0	4	JCF
Tmem158	2.8782e-282	2.27176	0.821	0.322	5.33216e-278	4	JCF
Tspan12	0	2.12935	0.798	0.281	0	4	JCF
Ppp1r14a	2.19826e-227	2.03927	0.767	0.318	4.07249e-223	4	JCF
Cxxc4	2.8387e-268	1.95879	0.796	0.28	5.25897e-264	4	JCF
Ptch1	2.22104e-223	1.8214	0.861	0.431	4.1147e-219	4	JCF
Hand1	0	1.79805	0.873	0.29	0	4	JCF
Tshz2	0	1.77385	0.974	0.655	0	4	JCF
Shisa3	5.14324e-209	1.75826	0.814	0.366	9.52837e-205	4	JCF
Foxf1	2.21822e-279	1.69802	0.955	0.456	4.10948e-275	4	JCF
Hsd11b2	2.08245e-265	1.678	0.949	0.5	3.85794e-261	4	JCF
Fndc3c1	3.52646e-212	1.63847	0.877	0.481	6.53313e-208	4	JCF
Tle4	1.14876e-181	1.52937	0.859	0.454	2.1282e-177	4	JCF
Dpysl3	7.15883e-159	1.42651	0.818	0.417	1.32624e-154	4	JCF
Cgnl1	2.56244e-158	1.39016	0.863	0.494	4.74717e-154	4	JCF
Tfdp2	4.03315e-163	1.24843	0.925	0.672	7.47182e-159	4	JCF
Dsp	1.55655e-139	1.19415	0.904	0.616	2.88366e-135	4	JCF
Cadm1	3.44267e-118	1.17315	0.817	0.466	6.37788e-114	4	JCF
Baz2b	4.51647e-150	1.1619	0.92	0.712	8.36722e-147	4	JCF
Sox11	4.69455e-260	1.15567	1	0.931	8.69712e-257	4	JCF
Htatsf1	1.89298e-142	1.14886	0.925	0.75	3.50693e-138	4	JCF
Meis2	1.01326e-177	1.08381	0.99	0.819	1.87716e-173	4	JCF
Gng12	1.85688e-117	1.06434	0.901	0.665	3.44006e-113	4	JCF
Sox4	3.70396e-187	1.04121	0.996	0.924	6.86196e-183	4	JCF
Nnat	4.55684e-172	1.03269	1	0.876	8.442e-168	4	JCF
Resf1	4.2635e-137	1.02984	0.948	0.774	7.89856e-133	4	JCF
Tubb2b	1.84489e-167	1.02037	0.987	0.799	3.41785e-163	4	JCF
Gpc6	9.91282e-93	1.00562	0.874	0.609	1.83645e-88	4	JCF
Fxyd6	1.54158e-98	0.991773	0.863	0.582	2.85594e-94	4	JCF
Hmgn5	1.26005e-89	0.950908	0.891	0.706	2.33437e-85	4	JCF
Smco4	4.44832e-80	0.942039	0.843	0.644	8.24095e-76	4	JCF
Col3a1	4.12496e-149	0.882845	0.978	0.692	7.64189e-145	4	JCF
Nrep	5.07266e-72	0.865488	0.839	0.619	9.39761e-67	4	JCF
Igdcc3	1.28091e-81	0.85785	0.87	0.595	2.373e-77	4	JCF
Stmn1	0	0.847488	1	0.998	0	4	JCF
Ube2e3	1.39578e-166	0.841085	0.988	0.937	2.58582e-161	4	JCF
Pdgfra	2.40949e-57	0.816585	0.781	0.508	4.46381e-53	4	JCF
Sinhcaf	4.03233e-116	0.808825	0.969	0.865	7.47029e-112	4	JCF
Meis1	5.00491e-73	0.807913	0.88	0.682	9.2721e-69	4	JCF
Rrm2	1.1153e-76	0.775742	0.952	0.834	2.0662e-73	4	JCF
Ptbp2	3.60592e-58	0.765976	0.854	0.665	6.68032e-54	4	JCF
Col5a2	2.65014e-71	0.759965	0.847	0.573	4.90964e-65	4	JCF
Hoxb2	6.78483e-55	0.759927	0.851	0.618	1.25696e-50	4	JCF
Acvr2b	7.71901e-54	0.742929	0.855	0.685	1.43002e-49	4	JCF
Vezf1	1.15591e-58	0.728355	0.887	0.725	2.14143e-54	4	JCF
Sfrp1	2.37393e-99	0.716137	0.982	0.739	4.39794e-95	4	JCF
Btg1	4.55786e-43	0.715007	0.839	0.656	8.44389e-39	4	JCF
Ccnd2	4.16616e-90	0.712457	0.96	0.855	7.71824e-86	4	JCF
Zfhx3	7.44532e-65	0.710958	0.923	0.78	1.37932e-60	4	JCF
Hoxb4	2.43147e-53	0.691411	0.872	0.632	4.50453e-49	4	JCF
Fbn2	2.66312e-41	0.681063	0.893	0.741	4.9337e-38	4	JCF
Gjc1	2.26747e-57	0.670975	0.895	0.741	4.20071e-53	4	JCF
Akap12	1.62374e-55	0.659078	0.817	0.559	3.00814e-51	4	JCF
Hdgfl3	5.28343e-37	0.654604	0.842	0.659	9.78807e-33	4	JCF
Ctxn1	2.74086e-50	0.647129	0.895	0.737	5.07771e-46	4	JCF
H2afy2	1.11444e-95	0.646651	0.994	0.891	2.06462e-91	4	JCF
Mex3a	2.54317e-54	0.643492	0.919	0.808	4.71147e-51	4	JCF
Ralgps2	4.09095e-24	0.640789	0.75	0.616	7.5789e-20	4	JCF
Commd3	7.67004e-27	0.632464	0.778	0.637	1.42095e-22	4	JCF
Foxn3	1.33154e-26	0.63192	0.785	0.647	2.46682e-22	4	JCF
Chd3	1.05951e-20	0.631663	0.751	0.6	1.96285e-15	4	JCF
Sh3bgrl	2.3892e-59	0.622029	0.936	0.843	4.42623e-54	4	JCF
Mdk	6.16484e-262	0.621839	1	0.994	1.1421e-258	4	JCF
Pkdcc	5.52392e-47	0.612834	0.952	0.848	1.02336e-42	4	JCF
Ezh2	6.19299e-98	0.611352	0.994	0.962	1.14731e-93	4	JCF
Smarcd1	1.64044e-40	0.609847	0.888	0.779	3.03908e-36	4	JCF
Peli1	7.08296e-24	0.599517	0.763	0.605	1.31219e-19	4	JCF
Impad1	3.48943e-32	0.586756	0.843	0.742	6.46451e-28	4	JCF
H1fx	1.68284e-58	0.585418	0.975	0.904	3.11764e-55	4	JCF
Ccdc34	7.32979e-75	0.581005	0.989	0.946	1.35792e-70	4	JCF
Nasp	8.42475e-152	0.580137	1	0.999	1.56077e-147	4	JCF
Hirip3	1.73996e-13	0.570218	0.751	0.661	3.22345e-09	4	JCF
Serf1	2.11785e-46	0.564321	0.938	0.853	3.92353e-42	4	JCF
Mapk3	3.46139e-29	0.554596	0.853	0.73	6.41258e-26	4	JCF
Tead2	2.38709e-76	0.552667	0.987	0.958	4.42232e-71	4	JCF
Casp3	1.49524e-17	0.551236	0.787	0.69	2.77008e-12	4	JCF
Dnajc9	2.17411e-44	0.544911	0.953	0.867	4.02776e-39	4	JCF
Pclaf	9.781e-70	0.537249	1	0.977	1.81203e-65	4	JCF
Cd24a	3.02018e-81	0.534694	0.998	0.91	5.59519e-77	4	JCF
Mbtd1	1.2475e-17	0.528803	0.797	0.673	2.31113e-13	4	JCF
Phip	9.65511e-32	0.523466	0.911	0.838	1.78871e-27	4	JCF
Atad2	1.29027e-15	0.523148	0.833	0.733	2.39035e-11	4	JCF
Ppm1a	6.45832e-16	0.520353	0.798	0.713	1.19647e-11	4	JCF
Cenph	8.95401e-14	0.517988	0.767	0.651	1.65882e-09	4	JCF
Mki67	6.51938e-12	0.517625	0.826	0.736	1.20778e-07	4	JCF
Zfp422	1.71874e-25	0.516161	0.877	0.775	3.18414e-21	4	JCF
Smarcc1	9.11305e-67	0.512858	0.999	0.974	1.68828e-62	4	JCF
Fnbp1l	4.63681e-27	0.512805	0.891	0.82	8.59016e-23	4	JCF
Dbn1	1.49411e-34	0.512743	0.934	0.861	2.76799e-30	4	JCF
Psip1	1.5978e-90	0.506912	0.999	0.985	2.96009e-87	4	JCF
Snrnp200	1.26499e-19	0.504027	0.84	0.754	2.34352e-15	4	JCF
Cdk2ap1	2.3485e-52	0.503604	0.974	0.934	4.35083e-48	4	JCF
H2afv	1.32073e-107	0.502614	1	0.99	2.44678e-103	4	JCF
Isoc1	5.17109e-33	0.501381	0.9	0.776	9.57996e-29	4	JCF
Gm1673	5.16959e-41	0.494262	0.979	0.883	9.57718e-38	4	JCF
Zfp292	1.05761e-20	0.489836	0.875	0.809	1.95933e-16	4	JCF
Map4k4	1.11781e-36	0.487929	0.965	0.908	2.07085e-32	4	JCF
Rab34	2.58996e-24	0.484523	0.855	0.729	4.79816e-20	4	JCF
Itga4	0	4.92852	0.76	0.098	0	5	PE
Lrrn4	0	3.87599	0.806	0.09	0	5	PE
Sox9	0	3.50373	0.883	0.25	0	5	PE
Upk3b	0	3.47581	0.884	0.143	0	5	PE
Tbx18	0	3.35237	0.878	0.186	0	5	PE
Mical2	0	3.28098	0.786	0.164	0	5	PE
Mgarp	0	3.18139	0.827	0.188	0	5	PE
Creb5	0	3.08461	0.767	0.148	0	5	PE
Stk26	0	2.96796	0.956	0.291	0	5	PE
Aplp1	0	2.72712	0.824	0.226	0	5	PE
Ddr1	0	2.69756	0.773	0.19	0	5	PE
Sfrp5	0	2.57096	0.905	0.203	0	5	PE
Atp1b1	0	2.54694	0.905	0.257	0	5	PE
Gadd45g	0	2.49682	0.812	0.271	0	5	PE
Wt1	0	2.48317	0.92	0.291	0	5	PE
Gucy1a1	0	2.45317	0.858	0.267	0	5	PE
Dipk2a	0	2.34742	0.794	0.249	0	5	PE
Igfbp5	0	2.26552	1	0.697	0	5	PE
Tcf21	5.74581e-280	2.25702	0.891	0.447	1.06447e-275	5	PE
P3h4	0	2.19691	0.966	0.445	0	5	PE
Bnc1	0	2.18469	0.755	0.2	0	5	PE
Smim1	0	2.13696	0.98	0.511	0	5	PE
Tmem108	0	2.12179	0.957	0.475	0	5	PE
Prxl2a	6.54419e-271	2.0907	0.912	0.52	1.21238e-266	5	PE
Pls3	0	2.08598	0.938	0.424	0	5	PE
Flrt2	0	2.08213	0.943	0.443	0	5	PE
C430049B03Rik	2.18177e-283	2.07279	0.91	0.417	4.04194e-279	5	PE
Celf2	7.25791e-252	2.03118	0.821	0.303	1.3446e-247	5	PE
Podxl	0	2.01665	0.912	0.365	0	5	PE
Slc1a3	8.09545e-278	2.00584	0.813	0.263	1.49976e-273	5	PE
Fbln2	2.68513e-267	1.99941	0.819	0.283	4.97447e-263	5	PE
Sdc4	4.57307e-226	1.95044	0.819	0.353	8.47206e-222	5	PE
Lpl	2.86088e-286	1.94606	0.929	0.442	5.30007e-282	5	PE
Frmd4b	2.82439e-242	1.93973	0.853	0.364	5.23246e-238	5	PE
Myl7	2.78837e-174	1.84883	0.817	0.48	5.16573e-170	5	PE
Rap2c	5.89956e-216	1.80181	0.914	0.585	1.09295e-210	5	PE
Glipr2	1.44557e-230	1.7789	0.826	0.324	2.67806e-227	5	PE
Myrf	4.9971e-245	1.6587	0.931	0.468	9.25762e-241	5	PE
Csrp1	5.09264e-208	1.62148	0.907	0.508	9.43462e-204	5	PE
Plp2	1.47077e-254	1.58534	0.962	0.599	2.72474e-250	5	PE
Rhou	1.84542e-194	1.56959	0.91	0.551	3.41883e-190	5	PE
Rnd3	2.06774e-167	1.56306	0.815	0.391	3.8307e-163	5	PE
Ppp1r12a	1.0965e-200	1.52221	0.962	0.817	2.03138e-196	5	PE
Cdh11	1.11986e-160	1.50424	0.822	0.386	2.07465e-156	5	PE
Rras2	8.9835e-164	1.48181	0.841	0.448	1.66428e-160	5	PE
Gyg	7.50359e-234	1.45929	0.953	0.57	1.39011e-229	5	PE
Ppfibp1	4.43765e-167	1.45665	0.889	0.522	8.22118e-163	5	PE
Pla2g12a	4.17487e-198	1.4504	0.937	0.566	7.73437e-194	5	PE
Soat1	1.79252e-202	1.43063	0.953	0.662	3.32082e-198	5	PE
Zyx	2.81601e-180	1.41615	0.916	0.585	5.21694e-176	5	PE
Flnc	7.48321e-142	1.41186	0.75	0.32	1.38634e-139	5	PE
Tagln	2.88083e-187	1.37438	0.807	0.316	5.33702e-184	5	PE
Ado	8.22174e-119	1.3329	0.792	0.441	1.52316e-114	5	PE
S100a10	9.6852e-206	1.32954	0.989	0.778	1.79428e-200	5	PE
Tmem98	6.8673e-154	1.31457	0.87	0.49	1.27224e-149	5	PE
Ugp2	2.33197e-158	1.24571	0.923	0.608	4.3202e-154	5	PE
Anxa2	3.01708e-204	1.24204	0.957	0.502	5.58944e-200	5	PE
Tnni1	2.08966e-217	1.23496	0.982	0.577	3.8713e-213	5	PE
Dctn6	2.52398e-133	1.23442	0.896	0.638	4.67593e-129	5	PE
Map3k4	5.37159e-90	1.22769	0.804	0.549	9.9514e-86	5	PE
Ralb	4.71792e-129	1.22199	0.869	0.506	8.74041e-125	5	PE
Pmp22	2.36947e-173	1.21626	0.968	0.59	4.38969e-170	5	PE
Degs1	8.08532e-154	1.2015	0.936	0.652	1.49789e-149	5	PE
Ly6e	4.44207e-80	1.18006	0.782	0.511	8.22938e-76	5	PE
Tenm3	1.35978e-113	1.17253	0.832	0.462	2.51912e-109	5	PE
Ezr	6.74126e-156	1.17215	0.94	0.635	1.24889e-151	5	PE
Epb41l3	6.88754e-107	1.17127	0.766	0.382	1.27598e-102	5	PE
Lmo4	1.31735e-91	1.15671	0.866	0.702	2.44053e-87	5	PE
Anxa5	7.65782e-158	1.15282	0.973	0.719	1.41869e-153	5	PE
Lbh	3.21484e-99	1.14711	0.757	0.395	5.9558e-96	5	PE
Cnn3	2.70473e-200	1.12523	0.998	0.971	5.01078e-196	5	PE
Klf6	1.52007e-96	1.11625	0.82	0.489	2.81609e-92	5	PE
Hcfc1r1	5.50936e-89	1.11508	0.798	0.487	1.02066e-84	5	PE
Tpm2	8.36242e-89	1.09339	0.805	0.47	1.54922e-85	5	PE
Fkbp10	1.35453e-91	1.08157	0.794	0.438	2.5094e-87	5	PE
Tgfb2	2.47071e-128	1.07104	0.936	0.607	4.57723e-124	5	PE
Arhgap1	2.29357e-82	1.0582	0.781	0.47	4.24906e-78	5	PE
Cgnl1	1.98431e-103	1.0537	0.85	0.498	3.67613e-99	5	PE
Itm2a	1.1706e-166	1.04869	0.991	0.734	2.16865e-162	5	PE
Colec12	2.03248e-120	1.04468	0.933	0.674	3.76537e-116	5	PE
Creb3l2	3.04245e-73	1.04089	0.755	0.436	5.63644e-69	5	PE
Mir99ahg	1.42852e-75	1.03359	0.773	0.471	2.64647e-71	5	PE
Sparc	1.63122e-217	1.02809	1	0.915	3.022e-213	5	PE
Cmtm7	7.09292e-81	1.01292	0.857	0.572	1.31403e-77	5	PE
Slc16a3	2.33929e-127	1.01267	0.959	0.771	4.33377e-123	5	PE
Jun	5.23779e-117	1.00832	0.967	0.731	9.70353e-112	5	PE
1810037I17Rik	8.08178e-159	0.990907	0.992	0.924	1.49723e-154	5	PE
Alad	7.23992e-110	0.987063	0.948	0.792	1.34127e-106	5	PE
Nectin2	7.81332e-94	0.973372	0.886	0.655	1.4475e-89	5	PE
Akap12	6.03939e-64	0.95576	0.821	0.561	1.11886e-59	5	PE
Tbrg1	1.12151e-189	0.946564	0.998	0.937	2.0777e-186	5	PE
Lrrc42	6.9671e-86	0.928794	0.877	0.637	1.29073e-81	5	PE
Lgals1	2.4489e-128	0.928182	0.992	0.871	4.53683e-124	5	PE
Ugdh	1.23927e-80	0.923548	0.862	0.579	2.29587e-76	5	PE
Wwc2	3.50222e-75	0.916356	0.871	0.667	6.48821e-71	5	PE
Pigyl	7.20889e-69	0.905436	0.822	0.547	1.33552e-64	5	PE
Hand2os1	5.04987e-88	0.901271	0.786	0.388	9.35538e-84	5	PE
Myl4	0	0.900073	0.985	0.44	0	5	PE
Runx1t1	6.84333e-82	0.899375	0.88	0.574	1.2678e-77	5	PE
Vim	1.24978e-143	0.883659	1	0.889	2.31535e-139	5	PE
Epha4	0	2.25266	0.866	0.318	0	6	LPM
Smim1	6.24762e-266	1.88889	0.954	0.513	1.15743e-261	6	LPM
Hoxa4	4.25438e-218	1.87316	0.803	0.306	7.88166e-212	6	LPM
Nrk	4.8113e-172	1.7614	0.796	0.356	8.91341e-168	6	LPM
Ezr	1.57551e-189	1.75412	0.927	0.636	2.91878e-185	6	LPM
Prnp	3.76174e-212	1.74949	0.879	0.407	6.969e-208	6	LPM
Dsg2	3.27033e-181	1.72567	0.811	0.368	6.05862e-177	6	LPM
Itm2a	4.23726e-203	1.70733	0.978	0.735	7.84995e-199	6	LPM
Wt1	1.50878e-170	1.60045	0.757	0.302	2.79516e-166	6	LPM
Hmcn1	8.95728e-169	1.59935	0.849	0.433	1.65942e-164	6	LPM
Hlx	1.67854e-196	1.58595	0.82	0.319	3.10966e-192	6	LPM
Sema6a	4.62029e-125	1.4489	0.769	0.382	8.55955e-121	6	LPM
Podxl	2.14166e-132	1.44782	0.772	0.375	3.96763e-128	6	LPM
Flrt3	1.26234e-182	1.4386	0.951	0.638	2.33861e-178	6	LPM
Plagl1	2.84584e-230	1.41821	0.994	0.706	5.2722e-226	6	LPM
Bicc1	4.22175e-106	1.39776	0.753	0.419	7.82121e-102	6	LPM
Tmem98	2.42153e-121	1.37547	0.824	0.494	4.48613e-117	6	LPM
Myrf	2.08035e-134	1.32584	0.853	0.474	3.85406e-130	6	LPM
Tmem108	8.22719e-126	1.27822	0.856	0.483	1.52417e-121	6	LPM
Hand2	3.06434e-166	1.26051	0.964	0.61	5.677e-162	6	LPM
Pim1	5.27013e-81	1.25984	0.777	0.503	9.76344e-77	6	LPM
Zmiz1	5.61036e-183	1.25156	0.964	0.781	1.03938e-178	6	LPM
P3h4	1.78244e-103	1.23037	0.789	0.457	3.30214e-99	6	LPM
Gata4	8.80871e-139	1.17185	0.932	0.583	1.6319e-134	6	LPM
Nr2f2	3.49418e-195	1.15282	0.999	0.839	6.47332e-191	6	LPM
Rhou	1.56981e-102	1.09652	0.857	0.554	2.90824e-98	6	LPM
Tfdp2	4.81029e-106	1.06116	0.899	0.676	8.91154e-102	6	LPM
Robo1	3.1943e-73	1.04638	0.773	0.477	5.91776e-68	6	LPM
Abcg2	1.47635e-83	1.0212	0.861	0.631	2.73509e-79	6	LPM
Phactr2	3.34283e-87	1.00442	0.85	0.526	6.19293e-83	6	LPM
Fndc3c1	2.14185e-64	0.997567	0.773	0.491	3.96798e-60	6	LPM
Atp2b1	3.88534e-123	0.994018	0.992	0.928	7.19798e-119	6	LPM
Plpp3	6.06055e-68	0.97881	0.833	0.604	1.12278e-62	6	LPM
Zcchc3	9.85227e-140	0.968677	0.975	0.854	1.82523e-135	6	LPM
Wwc2	4.57304e-65	0.936516	0.854	0.669	8.47202e-61	6	LPM
Amer1	2.8938e-46	0.921691	0.77	0.548	5.36106e-42	6	LPM
Mir99ahg	3.61701e-58	0.885691	0.769	0.472	6.70087e-54	6	LPM
Zfpm1	2.33981e-55	0.883709	0.794	0.549	4.33473e-51	6	LPM
Tcf21	4.44134e-81	0.83782	0.824	0.452	8.22802e-77	6	LPM
Plp2	2.12602e-64	0.836876	0.854	0.606	3.93867e-60	6	LPM
Hmga2	5.41297e-184	0.833766	1	0.992	1.00281e-179	6	LPM
Fbxl7	9.98868e-36	0.826657	0.753	0.533	1.8505e-31	6	LPM
Cdkn1c	5.67048e-109	0.82331	1	0.944	1.05051e-104	6	LPM
Foxf1	5.39133e-100	0.819152	0.888	0.464	9.98797e-95	6	LPM
Hoxb4	2.24281e-58	0.80943	0.878	0.634	4.15504e-54	6	LPM
Gata6	2.80213e-98	0.803135	0.977	0.779	5.19123e-94	6	LPM
Pigyl	6.57829e-40	0.798574	0.763	0.551	1.21869e-35	6	LPM
Pmp22	4.25126e-78	0.795686	0.908	0.594	7.87588e-74	6	LPM
Id2	6.51571e-141	0.767861	1	0.958	1.2071e-135	6	LPM
Nr2f1	7.57499e-84	0.751579	0.911	0.555	1.40334e-80	6	LPM
Id3	4.04205e-101	0.69106	0.996	0.959	7.4883e-97	6	LPM
Rap1a	7.50714e-52	0.689562	0.917	0.837	1.39077e-47	6	LPM
Hdgfl3	1.3179e-42	0.687886	0.867	0.659	2.44154e-38	6	LPM
Nrp1	1.12619e-56	0.684115	0.903	0.637	2.08637e-52	6	LPM
Dctn6	3.33516e-24	0.665832	0.791	0.645	6.17873e-19	6	LPM
Ifitm1	2.06596e-81	0.646194	0.865	0.494	3.82741e-78	6	LPM
Arid4b	2.0224e-51	0.645621	0.939	0.855	3.7467e-47	6	LPM
Col5a2	2.85172e-39	0.615276	0.823	0.577	5.2831e-35	6	LPM
1810037I17Rik	7.47553e-53	0.611812	0.974	0.925	1.38492e-47	6	LPM
2310009B15Rik	4.59859e-24	0.60855	0.807	0.655	8.51934e-20	6	LPM
Wls	1.0987e-30	0.607366	0.827	0.643	2.03546e-26	6	LPM
Pfn2	1.06237e-21	0.605742	0.777	0.623	1.96815e-17	6	LPM
Resf1	2.97356e-36	0.604351	0.912	0.777	5.50882e-32	6	LPM
Soat1	6.50021e-28	0.597565	0.827	0.67	1.20423e-23	6	LPM
Adk	5.82181e-39	0.590641	0.923	0.837	1.07855e-34	6	LPM
Hoxb2	3.23142e-31	0.590432	0.842	0.621	5.98653e-27	6	LPM
Ktn1	1.13349e-78	0.586126	0.995	0.967	2.0999e-74	6	LPM
Sfr1	3.31216e-111	0.578841	1	0.996	6.1361e-107	6	LPM
Dlk1	1.11073e-58	0.575682	0.992	0.855	2.05774e-54	6	LPM
Usp29	2.59366e-19	0.551703	0.794	0.61	4.80501e-15	6	LPM
Unc119	9.50935e-21	0.53485	0.853	0.716	1.7617e-16	6	LPM
Gas1	2.60058e-18	0.529993	0.785	0.588	4.81784e-14	6	LPM
2610001J05Rik	2.43599e-10	0.5179	0.771	0.651	4.51291e-06	6	LPM
Micu2	1.78259e-11	0.514455	0.769	0.644	3.30243e-07	6	LPM
Ptprs	1.0183e-20	0.513846	0.857	0.745	1.88651e-16	6	LPM
6330403K07Rik	2.85482e-37	0.508201	0.94	0.71	5.28884e-33	6	LPM
Hsd11b2	2.7093e-24	0.504665	0.761	0.516	5.01926e-20	6	LPM
Arl2	6.69471e-14	0.498832	0.823	0.714	1.24026e-09	6	LPM
Gpc6	2.92396e-18	0.49545	0.812	0.615	5.41693e-14	6	LPM
Cox19	6.20529e-13	0.494306	0.829	0.718	1.14959e-08	6	LPM
Ppp1cb	5.73674e-29	0.493298	0.94	0.862	1.06279e-24	6	LPM
Mapk3	5.69725e-20	0.492863	0.856	0.731	1.05547e-15	6	LPM
Taf15	2.34577e-13	0.49015	0.874	0.82	4.34578e-09	6	LPM
Map1b	3.34811e-64	0.489866	0.99	0.816	6.20272e-60	6	LPM
Meis1	7.16199e-22	0.484477	0.856	0.685	1.32683e-18	6	LPM
Rest	1.26e-14	0.47722	0.871	0.791	2.33428e-11	6	LPM
Nfib	2.17271e-12	0.469752	0.794	0.654	4.02515e-08	6	LPM
Ttc14	2.48215e-13	0.466429	0.859	0.765	4.59843e-09	6	LPM
Slc38a4	4.98699e-11	0.462944	0.77	0.617	9.2389e-07	6	LPM
Eno3	1.41143e-10	0.460732	0.785	0.635	2.61482e-06	6	LPM
Peg3	4.68426e-71	0.45566	1	0.991	8.67807e-67	6	LPM
Fis1	2.21122e-47	0.449862	0.993	0.983	4.0965e-43	6	LPM
Tshz2	3.09832e-09	0.44983	0.782	0.67	5.73995e-05	6	LPM
Rbms1	1.13975e-25	0.445569	0.962	0.909	2.1115e-21	6	LPM
Aprt	1.15415e-45	0.445153	1	0.992	2.13817e-41	6	LPM
Asb4	7.24934e-31	0.442189	0.915	0.724	1.34301e-26	6	LPM
Rhobtb3	8.4107e-20	0.434366	0.924	0.835	1.55817e-15	6	LPM
Tead1	8.57481e-06	0.418473	0.782	0.656	0.0158857	6	LPM
Cd2ap	1.92193e-10	0.415164	0.861	0.769	3.56058e-06	6	LPM
Krcc1	2.90255e-05	0.413902	0.775	0.68	0.537726	6	LPM
Prrx1	0	4.53648	0.911	0.087	0	7	STMII
Lix1	0	3.7799	0.955	0.217	0	7	STMII
Crabp1	0	3.3006	0.973	0.353	0	7	STMII
Msx1	0	2.95946	0.763	0.179	0	7	STMII
Lef1	0	2.77485	0.754	0.205	0	7	STMII
Twist1	0	2.68034	0.999	0.455	0	7	STMII
Msx2	0	2.47527	0.786	0.163	0	7	STMII
Crabp2	0	2.47064	0.957	0.509	0	7	STMII
Prrx2	0	2.4217	0.995	0.531	0	7	STMII
Col26a1	0	2.38923	0.777	0.197	0	7	STMII
Hoxb3	2.66406e-238	2.15983	0.772	0.269	4.93544e-234	7	STMII
Clmp	1.28331e-231	1.97374	0.758	0.245	2.37746e-227	7	STMII
Mpped2	2.1853e-175	1.97072	0.767	0.331	4.04848e-171	7	STMII
Sema3a	1.03558e-240	1.96156	0.801	0.271	1.91852e-236	7	STMII
Serpinf1	1.57589e-231	1.66739	0.912	0.4	2.9195e-227	7	STMII
Tshz1	9.7989e-127	1.56756	0.791	0.428	1.81534e-122	7	STMII
Gas1	1.31485e-221	1.55764	0.961	0.578	2.43589e-217	7	STMII
Igdcc3	3.57928e-162	1.50804	0.924	0.595	6.63098e-158	7	STMII
Ptn	1.07952e-168	1.33806	0.995	0.829	1.99991e-164	7	STMII
Sfrp1	2.83695e-99	1.28195	0.855	0.749	5.25573e-95	7	STMII
Pcolce	1.59176e-102	1.22035	0.768	0.377	2.94889e-99	7	STMII
Mfap4	1.89333e-112	1.20783	0.827	0.45	3.50759e-108	7	STMII
Pkdcc	4.40669e-174	1.18709	0.986	0.847	8.16384e-170	7	STMII
Zfp503	1.20123e-86	1.11695	0.822	0.484	2.22539e-83	7	STMII
Mthfd2	5.26561e-61	1.09086	0.752	0.475	9.75507e-57	7	STMII
Metrn	6.04222e-102	1.06513	0.908	0.665	1.11938e-97	7	STMII
Tcf12	3.91486e-111	1.0568	0.935	0.75	7.25267e-107	7	STMII
Sulf2	6.31018e-78	1.02358	0.781	0.447	1.16902e-73	7	STMII
Ddx21	3.81167e-93	0.996211	0.921	0.758	7.0615e-89	7	STMII
Efna2	1.86287e-67	0.983669	0.791	0.501	3.45115e-63	7	STMII
Pbx1	6.93973e-80	0.949767	0.963	0.884	1.28566e-73	7	STMII
Sdc1	5.95331e-50	0.931847	0.758	0.495	1.10291e-45	7	STMII
Snhg3	5.9434e-54	0.902778	0.876	0.736	1.10107e-49	7	STMII
Hist1h1b	5.30595e-30	0.891871	0.811	0.688	9.8298e-26	7	STMII
Rrp1b	4.16534e-51	0.884435	0.797	0.539	7.7167e-47	7	STMII
Hsph1	1.16164e-48	0.867615	0.831	0.658	2.15206e-44	7	STMII
Lyar	6.10995e-117	0.86082	0.99	0.92	1.13193e-112	7	STMII
Twistnb	2.04031e-67	0.836034	0.902	0.736	3.77987e-63	7	STMII
Nolc1	1.84753e-87	0.824892	0.972	0.889	3.42274e-83	7	STMII
Noc2l	8.19531e-47	0.814915	0.836	0.666	1.51826e-42	7	STMII
Ssbp3	4.54244e-91	0.81319	0.977	0.904	8.41532e-87	7	STMII
Mad2l1	1.94762e-48	0.811363	0.817	0.562	3.60816e-44	7	STMII
Nxn	9.21623e-45	0.811274	0.782	0.528	1.7074e-40	7	STMII
Eva1b	1.79673e-49	0.791805	0.829	0.578	3.32863e-45	7	STMII
Wdr12	1.9701e-36	0.791476	0.776	0.587	3.6498e-32	7	STMII
Epb41l4aos	3.25636e-37	0.789346	0.785	0.599	6.03274e-33	7	STMII
Meis2	1.63515e-64	0.783497	0.957	0.823	3.02928e-60	7	STMII
Hspd1	3.78611e-172	0.778516	1	0.999	7.01415e-168	7	STMII
Dkc1	8.38763e-75	0.763763	0.968	0.859	1.55389e-70	7	STMII
Zfp462	4.00313e-45	0.763162	0.825	0.597	7.4162e-41	7	STMII
Rsl1d1	2.14451e-112	0.761765	0.992	0.969	3.97292e-108	7	STMII
Ncl	1.29428e-133	0.7492	1	1	2.39778e-129	7	STMII
Gpatch4	6.74029e-35	0.748172	0.777	0.572	1.24871e-30	7	STMII
Rangrf	5.54945e-30	0.722283	0.759	0.557	1.02809e-25	7	STMII
Marcks	2.68389e-182	0.722234	1	0.999	4.97218e-178	7	STMII
Sfxn1	8.16589e-60	0.721382	0.935	0.805	1.51281e-55	7	STMII
Pabpc4	1.25808e-50	0.720811	0.89	0.728	2.33073e-46	7	STMII
Psat1	1.11088e-48	0.713928	0.806	0.566	2.05801e-44	7	STMII
Tcof1	2.72969e-47	0.70937	0.917	0.779	5.05702e-43	7	STMII
Prdx6	1.19356e-124	0.70876	0.999	0.978	2.21119e-120	7	STMII
Cacybp	3.30944e-118	0.703998	1	0.989	6.13107e-114	7	STMII
Mpp6	6.69003e-53	0.703445	0.92	0.785	1.2394e-48	7	STMII
Znrd2	1.42479e-68	0.699515	0.971	0.878	2.63957e-64	7	STMII
Id1	1.45992e-57	0.696341	0.972	0.888	2.70465e-53	7	STMII
Vcan	1.7287e-40	0.689839	0.864	0.657	3.20258e-36	7	STMII
Chchd4	6.67788e-22	0.663308	0.758	0.585	1.23714e-17	7	STMII
Fscn1	1.51636e-85	0.659936	0.989	0.899	2.8092e-83	7	STMII
Taf1d	1.30163e-58	0.648695	0.971	0.92	2.4114e-54	7	STMII
Gnl3	1.12383e-57	0.647497	0.966	0.884	2.082e-53	7	STMII
Mtx2	2.68127e-64	0.642019	0.964	0.868	4.96732e-60	7	STMII
Cdca7	6.44036e-36	0.64147	0.883	0.75	1.19314e-31	7	STMII
Hist1h2ap	3.03706e-18	0.640899	0.82	0.703	5.62645e-15	7	STMII
Zfas1	1.08418e-41	0.64002	0.931	0.844	2.00854e-37	7	STMII
Gar1	1.17281e-57	0.639868	0.962	0.858	2.17274e-53	7	STMII
Wdr43	8.69746e-35	0.635825	0.897	0.776	1.61129e-30	7	STMII
Uck2	4.46599e-20	0.635313	0.764	0.612	8.27369e-16	7	STMII
Timm8a1	5.21975e-40	0.628701	0.913	0.789	9.67011e-36	7	STMII
Enah	1.91347e-47	0.62787	0.952	0.802	3.5449e-43	7	STMII
Nsun2	1.35599e-28	0.614612	0.866	0.713	2.51211e-24	7	STMII
Prmt5	8.06282e-24	0.610874	0.817	0.669	1.49372e-18	7	STMII
Tma16	1.57489e-22	0.610503	0.752	0.551	2.91764e-18	7	STMII
Npm3	1.36792e-44	0.609764	0.911	0.774	2.53422e-41	7	STMII
Sept11	2.70933e-33	0.6042	0.93	0.813	5.0193e-29	7	STMII
Utp18	2.42048e-19	0.602102	0.762	0.588	4.48418e-15	7	STMII
Pa2g4	3.07476e-71	0.601393	0.989	0.95	5.6963e-67	7	STMII
Smc6	1.05947e-21	0.599753	0.959	0.895	1.96277e-17	7	STMII
Vars	1.32845e-20	0.596014	0.759	0.571	2.46108e-16	7	STMII
Eif2s2	1.61021e-114	0.594103	1	0.999	2.98307e-110	7	STMII
Ppid	6.19351e-54	0.592935	0.975	0.922	1.14741e-48	7	STMII
Mak16	4.00097e-23	0.592794	0.86	0.738	7.41219e-19	7	STMII
Atic	6.24854e-23	0.587579	0.833	0.715	1.15761e-18	7	STMII
Cdv3	6.72105e-72	0.586817	0.997	0.988	1.24514e-67	7	STMII
Cdk2ap1	1.81253e-72	0.580824	0.986	0.934	3.35788e-69	7	STMII
Trmt6	9.93725e-23	0.579335	0.832	0.678	1.84098e-18	7	STMII
Ftsj3	2.14291e-21	0.577522	0.81	0.655	3.96996e-18	7	STMII
Nop56	1.22801e-60	0.576971	0.99	0.951	2.27502e-56	7	STMII
Mat2a	2.26001e-47	0.575221	0.977	0.962	4.1869e-43	7	STMII
Pclaf	3.68987e-94	0.573997	1	0.977	6.83586e-90	7	STMII
Eml4	2.11973e-30	0.572608	0.898	0.766	3.92701e-26	7	STMII
Mybbp1a	4.5557e-40	0.571195	0.93	0.846	8.4399e-36	7	STMII
Wnt6	0	7.72295	0.962	0.03	0	8	EGT
Sfn	0	7.66772	0.839	0.013	0	8	EGT
Gjb3	0	7.60326	0.783	0.009	0	8	EGT
Tinagl1	0	4.45915	0.761	0.111	0	8	EGT
Slc2a3	0	4.42116	0.931	0.309	0	8	EGT
Igfbp2	0	4.39404	0.989	0.538	0	8	EGT
Wnt4	0	3.83654	0.808	0.107	0	8	EGT
Msx2	0	3.74523	0.903	0.156	0	8	EGT
Cd9	0	3.58198	0.821	0.187	0	8	EGT
Cox4i2	0	3.509	0.766	0.146	0	8	EGT
Wfdc2	0	3.49069	0.894	0.314	0	8	EGT
Pdlim1	0	3.4615	0.968	0.368	0	8	EGT
Plac8	0	3.43073	0.819	0.282	0	8	EGT
Npnt	0	3.42222	0.798	0.187	0	8	EGT
Slc2a1	1.04956e-273	3.39869	0.932	0.623	1.94441e-269	8	EGT
Krt8	2.00841e-252	3.31822	0.966	0.733	3.72078e-248	8	EGT
Cldn7	0	3.2546	0.908	0.145	0	8	EGT
Ahnak	1.45388e-293	3.1649	0.86	0.374	2.69345e-289	8	EGT
Krt18	2.60925e-289	3.13281	0.978	0.667	4.83389e-285	8	EGT
Bcam	0	2.94796	0.911	0.324	0	8	EGT
Epcam	0	2.93366	0.972	0.244	0	8	EGT
S100a11	0	2.84874	1	0.817	0	8	EGT
Spint2	0	2.80299	0.968	0.338	0	8	EGT
Mgst1	0	2.76955	0.844	0.276	0	8	EGT
Msx1	0	2.76305	0.788	0.178	0	8	EGT
Arl4c	0	2.74415	0.843	0.284	0	8	EGT
Anxa2	2.58615e-185	2.48528	0.833	0.512	4.7911e-181	8	EGT
Cldn6	0	2.41391	0.877	0.161	0	8	EGT
Dag1	6.01225e-269	2.24928	0.903	0.515	1.11383e-265	8	EGT
Gltp	5.33361e-209	2.10087	0.801	0.368	9.88104e-205	8	EGT
Cdc42ep5	1.75575e-201	1.98506	0.816	0.388	3.2527e-195	8	EGT
Serpinb6a	1.97457e-197	1.87902	0.863	0.471	3.65809e-193	8	EGT
Arhgap29	1.43276e-135	1.84372	0.806	0.495	2.65433e-131	8	EGT
Col18a1	4.1429e-261	1.79352	0.991	0.776	7.67514e-257	8	EGT
App	1.35699e-205	1.7875	0.941	0.677	2.51395e-200	8	EGT
S100a10	3.46095e-221	1.74619	0.986	0.78	6.41175e-217	8	EGT
Prtg	3.26153e-169	1.74482	0.845	0.468	6.04232e-165	8	EGT
Lamb1	1.83132e-136	1.65273	0.778	0.414	3.39271e-132	8	EGT
Ptprf	3.71411e-230	1.63819	0.986	0.779	6.88076e-227	8	EGT
Cdh3	4.0313e-139	1.63022	0.754	0.366	7.46839e-135	8	EGT
F11r	1.03245e-157	1.50214	0.826	0.393	1.91271e-153	8	EGT
Akap12	1.9209e-93	1.49493	0.821	0.562	3.55866e-89	8	EGT
Tnfaip8	4.23341e-103	1.48209	0.759	0.448	7.84282e-99	8	EGT
Cd24a	3.27109e-268	1.45029	1	0.911	6.06002e-264	8	EGT
Wls	1.59991e-163	1.43129	0.931	0.637	2.96399e-160	8	EGT
Plp2	4.21294e-147	1.42265	0.912	0.604	7.80489e-143	8	EGT
Ubqln2	7.45351e-99	1.38693	0.849	0.645	1.38084e-94	8	EGT
Crabp1	5.28408e-184	1.379	0.849	0.361	9.78928e-179	8	EGT
Slc9a3r1	5.0889e-127	1.35749	0.877	0.524	9.4277e-123	8	EGT
Dstn	2.21067e-262	1.35306	1	0.968	4.09549e-258	8	EGT
Rabac1	5.2559e-95	1.34288	0.796	0.542	9.73707e-91	8	EGT
Igdcc3	1.99034e-134	1.33149	0.911	0.596	3.68731e-129	8	EGT
Cd151	1.80047e-128	1.30692	0.899	0.606	3.33556e-124	8	EGT
Gja1	2.65017e-68	1.29268	0.806	0.556	4.9097e-64	8	EGT
Cstb	2.15834e-172	1.28395	0.981	0.862	3.99854e-168	8	EGT
Tubb2a	2.69652e-72	1.27554	0.787	0.579	4.99557e-69	8	EGT
Hmgn3	1.09323e-93	1.27096	0.799	0.512	2.02532e-90	8	EGT
Ezr	1.01014e-96	1.2617	0.885	0.64	1.87138e-92	8	EGT
Iqgap1	1.3155e-67	1.2607	0.765	0.549	2.4371e-63	8	EGT
Itm2c	9.6928e-115	1.25828	0.886	0.632	1.79569e-110	8	EGT
Papss1	2.54437e-94	1.2307	0.824	0.56	4.71369e-90	8	EGT
Trim71	3.82699e-88	1.19279	0.794	0.49	7.08988e-83	8	EGT
Cyb5r3	4.23869e-164	1.18757	0.974	0.811	7.85259e-160	8	EGT
Stard10	1.42946e-158	1.16261	0.791	0.309	2.64821e-154	8	EGT
Tead1	3.19579e-77	1.13381	0.856	0.652	5.92051e-73	8	EGT
Myh9	1.32829e-84	1.132	0.889	0.68	2.46079e-80	8	EGT
Rbbp7	1.25705e-130	1.09896	0.994	0.983	2.32881e-126	8	EGT
Hcfc1r1	8.62485e-67	1.08191	0.76	0.491	1.59784e-63	8	EGT
Bambi	3.94394e-95	1.07508	0.964	0.836	7.30655e-91	8	EGT
Mest	2.43428e-152	1.07147	0.996	0.931	4.50974e-147	8	EGT
Cadm1	3.0267e-73	1.05373	0.791	0.471	5.60727e-69	8	EGT
Vamp8	8.98938e-91	1.05009	0.884	0.649	1.66537e-86	8	EGT
Fndc3a	1.08249e-53	1.04975	0.812	0.626	2.00543e-47	8	EGT
Rbp1	3.20093e-102	1.04744	0.989	0.89	5.93004e-98	8	EGT
Parva	1.59092e-50	1.01661	0.762	0.557	2.94734e-46	8	EGT
Arid3a	7.7768e-77	1.00803	0.874	0.691	1.44073e-73	8	EGT
Atox1	6.73888e-194	1.00787	1	0.988	1.24845e-190	8	EGT
Adgrl2	5.98228e-58	0.997233	0.817	0.585	1.10828e-52	8	EGT
Fxyd6	8.75136e-48	0.978252	0.785	0.59	1.62128e-44	8	EGT
Ralbp1	6.22935e-82	0.951021	0.914	0.776	1.15405e-77	8	EGT
Nectin2	3.91865e-69	0.946286	0.88	0.657	7.25969e-65	8	EGT
Cxxc5	2.01843e-50	0.942481	0.768	0.536	3.73934e-45	8	EGT
Bsg	1.68579e-122	0.904077	1	1	3.12309e-118	8	EGT
Eif1a	1.98715e-58	0.896093	0.877	0.732	3.6814e-54	8	EGT
Tbrg1	5.71525e-80	0.885576	0.968	0.939	1.05881e-75	8	EGT
Igf1r	2.98954e-52	0.885293	0.852	0.652	5.53842e-48	8	EGT
Rcn1	2.48797e-72	0.867741	0.945	0.843	4.60922e-68	8	EGT
Gas1	1.0463e-60	0.857876	0.863	0.584	1.93838e-56	8	EGT
Reep5	2.91067e-43	0.850823	0.831	0.663	5.39231e-39	8	EGT
Igf2	2.63823e-104	0.843705	0.994	0.927	4.88758e-99	8	EGT
Pura	2.14764e-33	0.840068	0.764	0.597	3.97871e-29	8	EGT
Lbr	6.22229e-32	0.834773	0.765	0.588	1.15274e-27	8	EGT
Ryk	2.84952e-42	0.826095	0.866	0.757	5.27902e-39	8	EGT
Rnh1	1.10841e-33	0.798313	0.764	0.574	2.05344e-29	8	EGT
Actn4	3.80974e-59	0.793521	0.939	0.837	7.05793e-55	8	EGT
Mbd2	3.27099e-34	0.778134	0.762	0.59	6.05984e-30	8	EGT
Smad7	3.6254e-35	0.777728	0.814	0.633	6.71641e-31	8	EGT
Larp7	3.08637e-50	0.777548	0.902	0.772	5.71781e-46	8	EGT
Jun	1.73939e-09	0.76904	0.803	0.743	3.22239e-05	8	EGT
Ubl4a	4.19711e-38	0.765239	0.844	0.696	7.77557e-34	8	EGT
Fam183b	0	4.93924	0.764	0.07	0	9	HEPM
Mt2	0	4.18451	0.802	0.162	0	9	HEPM
Mt1	0	3.88267	0.934	0.365	0	9	HEPM
Ociad2	0	3.84161	0.817	0.196	0	9	HEPM
Rbp4	0	3.47592	0.88	0.271	0	9	HEPM
Cldn6	0	3.24333	0.883	0.164	0	9	HEPM
Epcam	0	3.22593	0.968	0.247	0	9	HEPM
Cldn7	0	2.9484	0.851	0.152	0	9	HEPM
Spint2	0	2.42415	0.941	0.343	0	9	HEPM
Emb	0	2.41767	0.949	0.438	0	9	HEPM
Slc2a3	7.40998e-243	2.06887	0.824	0.318	1.37277e-238	9	HEPM
Krt18	0	2.03709	0.994	0.667	0	9	HEPM
Wfdc2	1.39655e-166	1.86542	0.766	0.324	2.58725e-162	9	HEPM
Bex1	1.56343e-293	1.8501	1	0.921	2.8964e-289	9	HEPM
Gsta4	7.08801e-196	1.81898	0.92	0.602	1.31312e-191	9	HEPM
F11r	2.87349e-137	1.7923	0.781	0.397	5.32343e-133	9	HEPM
Pcbd1	6.74021e-212	1.75693	0.833	0.336	1.24869e-207	9	HEPM
Uchl1	4.45635e-123	1.66845	0.755	0.396	8.25584e-119	9	HEPM
Hmgn3	5.5743e-107	1.6397	0.803	0.513	1.0327e-102	9	HEPM
Lrpap1	1.31766e-121	1.62818	0.836	0.573	2.4411e-118	9	HEPM
Krt8	1.93363e-285	1.62471	1	0.732	3.58225e-281	9	HEPM
Bex4	1.82169e-239	1.55499	0.997	0.921	3.37486e-235	9	HEPM
Stard10	5.7388e-164	1.50191	0.781	0.311	1.06317e-159	9	HEPM
Phlda1	3.76982e-104	1.49911	0.869	0.572	6.98397e-100	9	HEPM
Gsto1	1.77652e-95	1.43888	0.861	0.633	3.29119e-91	9	HEPM
Ttr	3.67464e-287	1.26612	0.847	0.229	6.80763e-283	9	HEPM
Bnip3	5.56063e-88	1.1606	0.93	0.688	1.03016e-83	9	HEPM
Cbr1	2.8692e-59	1.14837	0.784	0.588	5.31548e-55	9	HEPM
Sox4	1.44107e-101	1.08868	0.975	0.926	2.66973e-97	9	HEPM
Ptprf	1.08161e-92	1.08318	0.955	0.782	2.00379e-88	9	HEPM
Trappc6a	6.53722e-77	1.08192	0.858	0.629	1.21109e-72	9	HEPM
Tceal9	7.84848e-228	1.01221	1	0.996	1.45401e-223	9	HEPM
Pdcd4	2.15155e-57	1.00898	0.806	0.576	3.98596e-53	9	HEPM
Tcf7l2	1.9751e-38	1.00036	0.802	0.628	3.65906e-34	9	HEPM
Myh9	1.09823e-51	0.97407	0.88	0.682	2.03458e-47	9	HEPM
Col4a1	4.96458e-111	0.959245	0.864	0.48	9.19738e-107	9	HEPM
Akr7a5	7.45003e-53	0.928729	0.824	0.619	1.38019e-48	9	HEPM
Cst3	6.16115e-67	0.924231	0.993	0.944	1.14142e-61	9	HEPM
Cd24a	4.95109e-142	0.90835	0.996	0.911	9.1724e-138	9	HEPM
Ivns1abp	1.18324e-54	0.893775	0.917	0.783	2.19207e-50	9	HEPM
Ctsz	3.48628e-22	0.883921	0.814	0.677	6.45869e-18	9	HEPM
Vps36	2.16288e-71	0.875062	0.959	0.853	4.00695e-66	9	HEPM
Nectin2	2.19345e-44	0.847088	0.862	0.659	4.06359e-40	9	HEPM
Dap	1.95647e-33	0.81473	0.857	0.664	3.62456e-29	9	HEPM
Ctsl	1.66685e-46	0.812185	0.97	0.917	3.08801e-42	9	HEPM
Pgk1	7.32931e-127	0.808929	1	0.997	1.35783e-122	9	HEPM
Ddt	5.54899e-68	0.805425	0.985	0.891	1.02801e-63	9	HEPM
Slc9a3r1	7.81624e-42	0.801018	0.799	0.53	1.44804e-37	9	HEPM
Golm1	9.46909e-32	0.789206	0.81	0.63	1.75424e-27	9	HEPM
Akap9	3.29878e-30	0.7821	0.899	0.753	6.11133e-26	9	HEPM
Afdn	7.5629e-53	0.780356	0.961	0.874	1.4011e-48	9	HEPM
Peg3	1.06599e-62	0.765478	0.999	0.992	1.97485e-58	9	HEPM
Fn1	3.53962e-38	0.754352	0.971	0.87	6.55749e-33	9	HEPM
Vamp8	5.50688e-35	0.751847	0.844	0.652	1.0202e-30	9	HEPM
Ubqln2	3.13495e-20	0.747174	0.784	0.65	5.8078e-16	9	HEPM
Pfkl	1.24754e-66	0.746024	0.979	0.87	2.31119e-62	9	HEPM
Cyb5r3	6.72062e-47	0.739218	0.939	0.814	1.24506e-42	9	HEPM
Usp29	7.33909e-18	0.733335	0.762	0.613	1.35964e-13	9	HEPM
Nrep	2.60626e-25	0.72026	0.807	0.624	4.82836e-21	9	HEPM
Ctxn1	7.33896e-42	0.714485	0.899	0.74	1.35961e-36	9	HEPM
Sox11	3.16893e-47	0.706535	0.977	0.933	5.87077e-44	9	HEPM
Map1lc3b	3.02843e-69	0.705468	0.989	0.935	5.61047e-64	9	HEPM
Itm2c	5.97067e-25	0.698288	0.799	0.638	1.10613e-19	9	HEPM
H2afv	8.32402e-109	0.679321	1	0.99	1.54211e-104	9	HEPM
Tle5	4.75361e-72	0.679142	0.994	0.817	8.80653e-68	9	HEPM
Sms	7.82421e-55	0.676736	0.983	0.912	1.44951e-50	9	HEPM
Sdcbp	5.2643e-19	0.674321	0.807	0.659	9.75265e-15	9	HEPM
Psap	3.20024e-12	0.665069	0.837	0.717	5.92876e-08	9	HEPM
Commd3	1.65679e-18	0.657825	0.792	0.638	3.06937e-14	9	HEPM
Atp6v1f	8.11596e-64	0.654401	0.99	0.946	1.50356e-59	9	HEPM
Malat1	1.60484e-23	0.649214	0.994	0.997	2.97313e-19	9	HEPM
Nr2f6	8.51809e-27	0.632946	0.868	0.703	1.57806e-22	9	HEPM
Bnip3l	4.04859e-60	0.63202	0.999	0.966	7.50042e-56	9	HEPM
Enah	1.06133e-25	0.630103	0.917	0.805	1.96622e-21	9	HEPM
Actr3	5.34745e-43	0.62246	0.97	0.923	9.90668e-39	9	HEPM
Hadh	9.25221e-30	0.617448	0.937	0.882	1.71406e-25	9	HEPM
Srek1ip1	3.04955e-09	0.616577	0.758	0.632	5.6496e-05	9	HEPM
Aplp2	5.5519e-15	0.599401	0.944	0.879	1.02855e-12	9	HEPM
Bsg	4.29861e-102	0.596574	1	1	7.96361e-98	9	HEPM
Tmem59	2.842e-26	0.586969	0.961	0.878	5.26509e-22	9	HEPM
Ftl1	8.61073e-189	0.576884	1	1	1.59522e-184	9	HEPM
Tm9sf3	1.10255e-20	0.570924	0.948	0.86	2.04259e-16	9	HEPM
Rbp1	4.52496e-45	0.565381	0.979	0.891	8.38294e-41	9	HEPM
1810058I24Rik	4.08876e-24	0.562726	0.99	0.981	7.57484e-20	9	HEPM
Ctsd	3.10617e-11	0.561264	0.864	0.727	5.75449e-07	9	HEPM
Pkm	7.12642e-124	0.551888	1	1	1.32024e-119	9	HEPM
Pnrc1	6.88556e-20	0.547585	0.93	0.823	1.27562e-15	9	HEPM
Mif	3.28387e-142	0.543097	1	1	6.0837e-139	9	HEPM
Ogt	2.49025e-08	0.541893	0.822	0.7	0.000461343	9	HEPM
Mycbp2	0.000368095	0.537193	0.791	0.686	6.81933	9	HEPM
App	2.28034e-18	0.530234	0.872	0.682	4.22456e-14	9	HEPM
Cd63	2.69635e-27	0.530204	0.975	0.892	4.99525e-23	9	HEPM
Jpt1	3.19836e-34	0.524724	0.993	0.982	5.92528e-30	9	HEPM
Strbp	6.62426e-07	0.52194	0.77	0.635	0.0122721	9	HEPM
Myl12b	8.57884e-37	0.513687	0.993	0.938	1.58932e-32	9	HEPM
Ube2d1	8.3728e-05	0.511358	0.752	0.63	1.55115	9	HEPM
Cnot7	8.92607e-08	0.510535	0.815	0.694	0.00165364	9	HEPM
Npc2	1.70086e-39	0.499466	1	0.966	3.151e-34	9	HEPM
H1fx	6.69722e-20	0.498429	0.964	0.906	1.24073e-15	9	HEPM
Grcc10	1.00801e-34	0.49063	0.994	0.953	1.86743e-30	9	HEPM
Actc1	0	7.71556	0.964	0.085	0	10	CM
Ttn	0	7.5629	0.873	0.062	0	10	CM
Csrp3	0	7.40973	0.843	0.031	0	10	CM
Tnnc1	0	7.3777	0.859	0.073	0	10	CM
Fbxo32	0	6.00859	0.865	0.046	0	10	CM
Tnnt2	0	5.89113	0.998	0.204	0	10	CM
Rbm24	0	5.82586	0.925	0.049	0	10	CM
Mybpc3	0	5.64097	0.773	0.032	0	10	CM
Ppp1r14c	0	5.57587	0.943	0.066	0	10	CM
Sh3bgr	0	5.57208	0.924	0.123	0	10	CM
Shox2	0	5.56838	0.995	0.106	0	10	CM
Pgam2	0	5.25916	0.94	0.103	0	10	CM
Myl4	0	5.02718	1	0.449	0	10	CM
Myl7	0	4.9746	1	0.477	0	10	CM
Hcn4	0	4.89955	0.894	0.085	0	10	CM
Slc8a1	0	4.89834	0.888	0.121	0	10	CM
Rec114	0	4.7003	0.805	0.076	0	10	CM
Acta2	0	4.59664	0.998	0.374	0	10	CM
Cap2	0	4.59421	0.81	0.072	0	10	CM
Ryr2	0	4.50293	0.927	0.141	0	10	CM
Vsnl1	0	4.5019	0.982	0.146	0	10	CM
Cacna2d2	0	4.36193	0.828	0.091	0	10	CM
Adm	0	4.13465	0.839	0.111	0	10	CM
Unc45b	0	4.08108	0.873	0.108	0	10	CM
Nexn	0	3.99005	0.955	0.243	0	10	CM
Myl9	0	3.95377	0.933	0.318	0	10	CM
Ccdc141	0	3.87413	0.914	0.179	0	10	CM
Chchd10	0	3.874	0.891	0.256	0	10	CM
Spon1	0	3.70136	0.857	0.146	0	10	CM
Smoc2	0	3.64203	0.904	0.217	0	10	CM
Gyg	0	3.4228	0.998	0.575	0	10	CM
Wnt2	0	3.38485	0.927	0.233	0	10	CM
Tnni1	0	3.26716	1	0.583	0	10	CM
Slit3	0	3.00545	0.828	0.234	0	10	CM
Tagln	0	2.98154	0.912	0.32	0	10	CM
Atp2a2	0	2.91586	0.994	0.777	0	10	CM
Lbh	0	2.86578	0.985	0.391	0	10	CM
Atp1b1	0	2.84206	0.914	0.268	0	10	CM
Bmp4	1.33493e-256	2.74991	0.881	0.34	2.47309e-252	10	CM
Zbtb20	7.33195e-268	2.70033	0.854	0.285	1.35832e-263	10	CM
Popdc2	1.14616e-249	2.69038	0.771	0.225	2.12338e-245	10	CM
Angpt1	2.13266e-232	2.64901	0.786	0.251	3.95096e-228	10	CM
Tenm4	2.52776e-248	2.64648	0.781	0.234	4.68293e-244	10	CM
Tbx18	0	2.6138	0.896	0.198	0	10	CM
Tbx5	0	2.60164	0.83	0.199	0	10	CM
Mef2c	0	2.59799	0.982	0.371	0	10	CM
Igfbp5	0	2.59356	1	0.703	0	10	CM
Tgfb1i1	3.29363e-242	2.52492	0.846	0.307	6.10178e-238	10	CM
Smarcd3	4.74183e-240	2.37369	0.844	0.305	8.78472e-237	10	CM
Pakap.1	4.38161e-206	2.34524	0.784	0.273	8.11737e-202	10	CM
Gpx3	2.84112e-281	2.3365	0.987	0.626	5.26346e-277	10	CM
Gucy1a1	4.28688e-256	2.29442	0.872	0.277	7.94187e-252	10	CM
Ank3	5.88142e-205	2.29431	0.846	0.343	1.08959e-200	10	CM
Celf2	1.14998e-227	2.16212	0.859	0.311	2.13046e-223	10	CM
Nfia	4.24396e-182	2.12067	0.753	0.253	7.86236e-178	10	CM
Gm45716	3.99962e-137	2.08593	0.769	0.377	7.40969e-133	10	CM
Tpm1	3.01428e-288	2.08559	1	0.961	5.58425e-284	10	CM
Col4a5	3.20867e-181	2.00868	0.825	0.323	5.94438e-177	10	CM
Hcfc1r1	7.36242e-171	1.98732	0.888	0.488	1.36396e-166	10	CM
Nr2f1	2.3744e-228	1.97637	0.979	0.557	4.39882e-224	10	CM
Aif1l	1.0445e-170	1.97515	0.833	0.369	1.93504e-166	10	CM
Irf2bpl	2.11781e-145	1.90001	0.782	0.332	3.92345e-141	10	CM
Cnn2	2.40031e-236	1.86452	0.992	0.698	4.44682e-232	10	CM
Palld	5.53061e-149	1.86157	0.847	0.441	1.0246e-144	10	CM
Map1b	1.2365e-245	1.83685	1	0.819	2.29074e-241	10	CM
Tpm2	3.70546e-156	1.78573	0.881	0.472	6.86473e-152	10	CM
Fras1	6.64318e-134	1.77661	0.825	0.406	1.23072e-129	10	CM
Vcan	1.40854e-169	1.71093	0.961	0.655	2.60946e-166	10	CM
Josd2	4.97318e-118	1.70166	0.825	0.457	9.21332e-114	10	CM
Flrt2	4.07263e-112	1.69716	0.818	0.458	7.54496e-108	10	CM
Khdrbs3	4.37001e-158	1.64154	0.933	0.628	8.09588e-154	10	CM
Dstn	4.00804e-272	1.63938	1	0.968	7.42529e-268	10	CM
Maged2	2.2712e-202	1.6241	0.997	0.814	4.20763e-198	10	CM
Anxa6	2.74827e-134	1.62006	0.833	0.402	5.09144e-130	10	CM
Lpl	1.65943e-167	1.6118	0.922	0.451	3.07426e-163	10	CM
Cited2	2.55501e-170	1.60865	0.981	0.676	4.73341e-165	10	CM
Arhgap1	4.58531e-122	1.60015	0.838	0.473	8.49475e-117	10	CM
Pdlim7	1.58707e-188	1.5892	0.971	0.749	2.94021e-184	10	CM
Cdh2	8.15312e-140	1.4656	0.94	0.627	1.51045e-135	10	CM
Igf2r	4.96227e-176	1.46164	0.989	0.805	9.1931e-172	10	CM
Thra	1.85772e-98	1.45284	0.799	0.419	3.44161e-94	10	CM
Hand2os1	2.32716e-117	1.4398	0.843	0.393	4.31129e-113	10	CM
Tenm3	5.26871e-99	1.42555	0.834	0.468	9.76081e-94	10	CM
Csrp2	2.83633e-61	1.41879	0.987	0.969	5.25459e-57	10	CM
Coprs	1.97529e-71	1.41608	0.753	0.459	3.65943e-67	10	CM
Atp1a1	9.05059e-148	1.38754	0.966	0.738	1.67671e-143	10	CM
Ppp1r12a	7.02535e-169	1.38715	0.974	0.819	1.30152e-167	10	CM
Cadm1	1.33536e-74	1.36979	0.799	0.475	2.47389e-70	10	CM
Creb3l2	4.06562e-88	1.35083	0.794	0.44	7.53198e-84	10	CM
Dsp	4.27693e-87	1.34871	0.894	0.623	7.92344e-83	10	CM
Fbln1	9.4582e-100	1.34384	0.932	0.767	1.75223e-95	10	CM
Eno3	4.90308e-99	1.32163	0.904	0.632	9.08344e-95	10	CM
Myl6	3.08469e-281	1.30422	1	1	5.71469e-277	10	CM
Rbpms2	6.8079e-82	1.27481	0.813	0.464	1.26123e-78	10	CM
Ssbp2	9.06233e-95	1.27272	0.875	0.555	1.67889e-91	10	CM
Got1	2.99775e-65	1.26823	0.774	0.496	5.55362e-61	10	CM
Hacd1	6.7096e-66	1.26792	0.812	0.547	1.24302e-61	10	CM
Reep5	2.3098e-114	1.2618	0.945	0.66	4.27913e-110	10	CM
Pla2g12a	1.09639e-112	1.24332	0.917	0.574	2.03117e-108	10	CM
Tgfb2	6.96022e-108	1.22912	0.951	0.612	1.28945e-103	10	CM
Hbb-y	7.20747e-06	0.819779	1	0.863	0.133526	11	HB
Gm42418	2.48431e-75	0.807669	1	1	4.60243e-71	11	HB
Mrps6	2.37063e-07	0.796015	0.911	0.651	0.00439182	11	HB
Fcf1	2.04085e-09	0.794085	0.932	0.678	3.78088e-05	11	HB
Hba-x	4.41348e-05	0.792748	0.969	0.722	0.817641	11	HB
Gapdh	1.77365e-113	0.738231	1	1	3.28586e-109	11	HB
Dctn6	5.84685e-06	0.727714	0.904	0.648	0.108319	11	HB
Aimp2	0.248594	0.716948	0.771	0.607	4605.46	11	HB
Naa10	0.0013282	0.700515	1	0.802	24.6062	11	HB
Mrpl40	1.20748	0.691063	0.87	0.661	2236.97	11	HB
Trmt112	9.14231e-25	0.676437	1	0.967	1.6937e-20	11	HB
Vamp8	9.36603e-07	0.672456	0.952	0.656	0.0173515	11	HB
Mea1	0.0657097	0.657909	0.928	0.693	1217.34	11	HB
Rpl9-ps6	0.130682	0.650031	0.925	0.709	2421.01	11	HB
Ttr	8.06855e-138	0.648106	0.945	0.247	1.49478e-133	11	HB
Asna1	390.769	0.647314	0.969	0.751	7.23939e+06	11	HB
Gpx1	7.90668e-27	0.636273	1	0.988	1.46479e-22	11	HB
Fdx2	14.6853	0.635427	0.935	0.725	272059	11	HB
Ptrh2	0.292124	0.629965	0.956	0.705	5411.9	11	HB
Tmem11	0.118569	0.618098	0.925	0.68	2196.6	11	HB
Vps28	0.993963	0.615067	0.829	0.633	184141	11	HB
Wdr83os	1.80148	0.611663	0.939	0.702	33374.2	11	HB
Bmyc	2.79365	0.611142	0.939	0.687	51755.1	11	HB
Rbm42	44.2069	0.600789	0.884	0.675	818977	11	HB
Cdc34	0.0297381	0.599547	1	0.861	550.929	11	HB
Timm10	0.983944	0.596174	0.949	0.682	18228.6	11	HB
Mrpl4	208085	0.580817	0.785	0.644	3.85498e+09	11	HB
Ndufv1	21.3295	0.579833	0.98	0.772	395150	11	HB
Ppan	42520.7	0.57864	0.765	0.602	7.87739e+08	11	HB
Atp5d	1.36793e-41	0.578146	1	1	2.53423e-37	11	HB
Pnkd	1381.59	0.569154	0.973	0.778	2.55953e+07	11	HB
Ndufaf2	548.7	0.564185	0.874	0.67	1.01652e+08	11	HB
Mrto4	0.183801	0.562303	0.997	0.881	3405.1	11	HB
Srm	0.000105305	0.558734	1	0.848	1.95088	11	HB
Gtf2b	8057.48	0.55823	0.87	0.666	1.49273e+08	11	HB
Brix1	87.3701	0.552289	0.986	0.771	1.61862e+06	11	HB
Mien1	2.05644e+06	0.550974	0.765	0.623	0.00380976	11	HB
Alad	0.278415	0.550727	1	0.797	51579.1	11	HB
Znrd2	26.4999	0.548721	1	0.88	4.90937e+06	11	HB
Rnf5	603.798	0.547592	0.898	0.657	1.1186e+07	11	HB
Med29	230138	0.545002	0.976	0.782	4.26353e+09	11	HB
Prdx1	3.47202e-55	0.544912	1	1	6.43227e-51	11	HB
Dusp9	1.02336e-12	0.543097	0.952	0.603	1.89588e-08	11	HB
Tmed1	5315.38	0.537339	0.922	0.696	9.84728e+07	11	HB
Ndufa6	5.52451e-11	0.537279	1	0.969	1.02347e-06	11	HB
Actb	4.23811e-73	0.536933	1	1	7.85151e-69	11	HB
Rnf126	161.041	0.53628	0.966	0.75	2.98345e+06	11	HB
Ubl4a	127.278	0.533212	0.935	0.699	235795	11	HB
Isyna1	4400.18	0.530938	0.997	0.779	8.15178e+07	11	HB
Bud23	1.87394e+06	0.529829	0.891	0.678	0.000347166	11	HB
Psmc1	114.83	0.528729	1	0.859	2.12734e+06	11	HB
Ntmt1	2.93069e+06	0.525922	0.778	0.639	0.000542939	11	HB
Bola1	2159.16	0.52559	0.966	0.736	4.00005e+07	11	HB
Gm11808	10301	0.523079	0.925	0.695	1.90836e+08	11	HB
Clpp	625.308	0.521649	0.99	0.776	1.15845e+07	11	HB
Mrps34	2949.1	0.519705	0.976	0.74	5.4635e+08	11	HB
Mrpl30	1.53527e-06	0.519371	1	0.951	0.284425	11	HB
Fmc1	2710.98	0.518453	0.949	0.727	5.02236e+07	11	HB
Sf3b4	540633	0.518327	0.983	0.791	0.000100158	11	HB
Smu1	30779.6	0.516979	0.942	0.712	5.70224e+08	11	HB
Cox8a	5.12262e-53	0.516941	1	1	9.49017e-49	11	HB
Eif4ebp1	0.0011005	0.516891	0.997	0.922	20.3878	11	HB
Slc25a39	24.6759	0.514262	1	0.833	457146	11	HB
Mrps11	160560	0.513493	0.84	0.653	2.97454e+09	11	HB
Ftl1	1.15711e-76	0.510079	1	1	2.14367e-72	11	HB
1110065P20Rik	663.991	0.509774	0.898	0.661	1.23011e+07	11	HB
Rps4x	1.21004e-93	0.509298	1	1	2.24172e-89	11	HB
Csnk2b	9.1677	0.507768	1	0.929	169841	11	HB
Churc1	145562	0.506813	0.846	0.659	0.000269669	11	HB
Exosc4	6454.48	0.50559	0.973	0.733	1.19576e+09	11	HB
Zfp428	26658.5	0.502624	0.935	0.711	4.93876e+08	11	HB
Sod2	75129.9	0.499574	0.959	0.723	1.39186e+09	11	HB
Fh1	14281.9	0.49738	0.98	0.789	2.64587e+09	11	HB
Tubb5	5.638e-60	0.496493	1	1	1.0445e-55	11	HB
Ccdc124	1.37858e+07	0.496356	1	0.848	0.00255395	11	HB
Adrm1	8554.84	0.495967	0.966	0.756	1.58487e+08	11	HB
Ndufb6	0.109266	0.495513	1	0.953	2024.26	11	HB
Myg1	3.54089e+06	0.493169	0.867	0.671	0.000655985	11	HB
Znhit1	9959.01	0.492928	0.925	0.69	1.84501e+08	11	HB
Lsm7	4.52827e-07	0.491862	1	0.983	0.00838907	11	HB
Tuba1b	5.35631e-41	0.491671	1	1	9.9231e-37	11	HB
Tsen15	22903	0.491294	0.877	0.655	4.243e+06	11	HB
Cisd1	9408	0.488923	0.973	0.748	1.74293e+08	11	HB
Mrpl27	367279	0.487914	0.986	0.784	0.0068042	11	HB
Eef1e1	4465.62	0.486763	0.925	0.667	8.27302e+07	11	HB
Gm2000	48578.9	0.486074	0.956	0.754	8.99972e+08	11	HB
Arl2	32932.5	0.485043	0.949	0.716	6.10107e+07	11	HB
Cetn3	0.00290165	0.484948	1	0.954	53.7559	11	HB
Trappc2l	98255.1	0.484155	0.894	0.664	1.82027e+09	11	HB
Psmb3	2.0293e-19	0.482657	1	0.998	3.75948e-15	11	HB
Rpl6	1.44043e-90	0.481588	1	1	2.66854e-86	11	HB
Cope	268700	0.481172	1	0.843	4.97794e+09	11	HB
Cox20	12704.5	0.480593	0.942	0.697	2.35363e+08	11	HB
Rnaseh2a	1.13859e+08	0.480024	0.768	0.627	0.0210936	11	HB
Mrps35	276136	0.479236	0.922	0.706	5.1157e+09	11	HB
Mrps26	666558	0.478801	0.973	0.759	0.000123487	11	HB
Ndufb4	4.21505e-07	0.478312	1	0.967	0.0078088	11	HB
Dda1	3.18014e+06	0.478286	0.85	0.667	0.000589152	11	HB
Actr10	969502	0.478237	0.956	0.73	0.00017961	11	HB
Nop16	576771	0.47753	0.959	0.712	0.000106853	11	HB
Gng11	3.60033e-74	1.99788	0.942	0.474	6.66997e-71	12	ECII
Crip2	1.69935e-72	1.84058	0.93	0.43	3.14821e-68	12	ECII
Tagln2	2.45215e-62	1.76786	0.996	0.643	4.54285e-58	12	ECII
Arpc1b	4.86722e-36	1.75787	0.811	0.467	9.01701e-32	12	ECII
Ramp2	1.58504e-63	1.71087	0.79	0.298	2.93644e-59	12	ECII
Tmsb4x	2.38172e-36	1.69022	1	0.954	4.41238e-32	12	ECII
Egfl7	1.14367e-68	1.58843	0.988	0.577	2.11876e-65	12	ECII
Gap43	1.82155e-53	1.58708	0.872	0.396	3.3746e-49	12	ECII
Rap1b	0.0371907	1.50382	0.992	0.855	688.996	12	ECII
Rab11a	3.54818e-29	1.30466	0.992	0.76	6.57336e-25	12	ECII
Arpc3	5.85122e-58	1.25874	1	0.937	1.084e-53	12	ECII
Cotl1	2.40507e-30	1.21696	0.951	0.633	4.45564e-26	12	ECII
Ccdc85b	1.29748e-32	1.21584	0.955	0.685	2.40372e-28	12	ECII
Sh3bgrl3	3.44053e-47	1.12818	1	0.947	6.37393e-43	12	ECII
Vasp	1.76084e-09	1.07221	0.77	0.553	3.26213e-05	12	ECII
Pnp	1.97866e-06	1.0555	0.774	0.556	0.0366567	12	ECII
Rnasek	41.0437	1.03986	0.979	0.801	760375	12	ECII
Abhd17a	9.33809e-18	1.03457	0.971	0.767	1.72997e-13	12	ECII
Mrps6	2.04383e-07	1.01582	0.856	0.653	0.00378639	12	ECII
Ralb	1.04705e-09	1.01408	0.786	0.524	1.93976e-05	12	ECII
Rap1a	4.95508e-08	0.903117	0.979	0.84	0.00917977	12	ECII
Slc25a5	4.32175e-39	0.875163	1	0.986	8.00647e-35	12	ECII
Cap1	339811	0.873302	0.852	0.705	6.29535e+09	12	ECII
Fkbp1a	8.55268e-51	0.862849	1	0.997	1.58447e-44	12	ECII
Ndufa8	2.30847e-18	0.8472	0.992	0.937	4.27667e-14	12	ECII
Nhp2	1.30045e-25	0.840282	0.996	0.968	2.40921e-21	12	ECII
Srm	8.42654e-15	0.835293	0.988	0.849	1.5611e-10	12	ECII
Pitpna	4.65243e-08	0.810349	0.967	0.736	0.000861909	12	ECII
Uchl5	34.7447	0.809595	0.778	0.609	643679	12	ECII
Timm10	2.69695	0.786121	0.877	0.684	49963.7	12	ECII
Arpc5	2.51033e-09	0.779779	0.996	0.874	4.65063e-05	12	ECII
Gm42418	3.79187e-16	0.773979	1	1	7.02481e-12	12	ECII
0610010K14Rik	1.27679e-06	0.771041	0.988	0.823	0.00236538	12	ECII
Hprt	0.000739248	0.767541	0.864	0.642	1369.53	12	ECII
Snhg6	30.4632	0.751374	0.835	0.666	5.6436e+06	12	ECII
Nop16	0.0020686	0.747752	0.93	0.714	38.3228	12	ECII
Snx3	3.92548e-15	0.736165	0.996	0.935	7.27235e-11	12	ECII
Ccdc12	2.20758e+07	0.729872	0.992	0.855	0.00408976	12	ECII
Timm8a1	0.000351997	0.728448	0.975	0.793	6.52109	12	ECII
Arpc4	892.284	0.711425	0.942	0.78	1.65305e+07	12	ECII
Vamp8	2.75027	0.69768	0.901	0.658	50951.5	12	ECII
Utp11	4.8231	0.683689	0.971	0.819	8935.27	12	ECII
Ppid	8.62183e-05	0.682905	0.992	0.923	0.159728	12	ECII
Nt5c	1.40871	0.679617	0.93	0.745	26097.8	12	ECII
Vim	4.05007e-12	0.670153	0.955	0.895	7.50316e-08	12	ECII
Eif4ebp1	1.03356e-06	0.641661	0.992	0.922	0.191477	12	ECII
Pfn1	3.10517e-54	0.637612	1	1	5.75263e-49	12	ECII
Eif2s2	1.80589e-31	0.630612	1	0.999	3.34559e-26	12	ECII
Srp9	0.00362336	0.629184	1	0.925	67.1263	12	ECII
Npm3	1087.39	0.627801	0.955	0.779	2.01451e+07	12	ECII
Ufm1	52823.8	0.623346	0.934	0.761	9.78613e+08	12	ECII
Cycs	2.3636e-14	0.610117	0.992	0.984	4.3788e-10	12	ECII
Sh3glb1	0.52048	0.602072	0.975	0.854	9642.41	12	ECII
Ppp1r2	1480.07	0.597666	0.975	0.827	2.74197e+07	12	ECII
Ltv1	56986.5	0.588244	0.84	0.655	1.05573e+09	12	ECII
Hmox2	245979	0.587962	0.753	0.619	0.000455701	12	ECII
Naa20	25759.2	0.579366	0.947	0.764	4.77215e+08	12	ECII
Pdcd10	2.22365e+09	0.575224	0.901	0.756	0.411954	12	ECII
Anxa5	186.828	0.573392	0.93	0.731	3.46118e+06	12	ECII
Imp3	6.97046	0.572167	0.984	0.872	129135	12	ECII
Timm9	2.57251e+06	0.571822	0.811	0.657	0.000476583	12	ECII
Ap2s1	5.48383	0.565322	1	0.943	101593	12	ECII
Mrpl17	0.00716181	0.558155	0.992	0.935	132.68	12	ECII
Btbd1	9.46943e+06	0.553901	0.856	0.686	0.00175431	12	ECII
Ciao2a	296032	0.551931	0.979	0.865	5.48429e+09	12	ECII
Rab5c	5.70664e+06	0.549846	0.815	0.654	0.00105721	12	ECII
Csnk2b	21.5527	0.549734	0.996	0.929	399285	12	ECII
Pak1ip1	6.26339e+07	0.548964	0.848	0.682	0.0116036	12	ECII
Cox17	51090.7	0.546446	0.992	0.916	9.46507e+08	12	ECII
Calm1	2.94107e-30	0.54154	1	1	5.44863e-26	12	ECII
Cdk1	12.9415	0.536044	0.979	0.787	239754	12	ECII
Fcf1	4.93097e+07	0.535195	0.84	0.681	0.00913512	12	ECII
Rexo2	6935.58	0.535149	0.93	0.718	1.28489e+07	12	ECII
Pum3	1.27377e+08	0.534557	0.835	0.694	0.0235979	12	ECII
Wdr74	5.78172e+07	0.532183	0.79	0.643	0.0107112	12	ECII
Rrp15	1.64991e+07	0.526093	0.868	0.723	0.00305662	12	ECII
Gtf2e2	79348	0.52396	0.963	0.811	1.47e+08	12	ECII
Gadd45gip1	845801	0.517798	0.848	0.677	0.00156693	12	ECII
Bola2	32.7731	0.516329	0.996	0.952	607154	12	ECII
Cdc42	1.01777e-10	0.516126	1	0.998	1.88553e-06	12	ECII
Llph	131.725	0.514873	0.996	0.933	244033	12	ECII
Uqcrq	4.07061e-15	0.514824	1	0.998	7.5412e-11	12	ECII
Cenpx	34897.3	0.508387	0.975	0.852	6.46508e+08	12	ECII
Xpnpep1	3.02637e+08	0.506484	0.774	0.641	0.0560665	12	ECII
Atp5g1	1.1656e-12	0.506177	1	0.999	2.15939e-08	12	ECII
Dda1	2.82212e+07	0.504704	0.815	0.668	0.0522825	12	ECII
Eif5a	1.15124e-32	0.502915	1	1	2.13278e-30	12	ECII
Gemin7	5.73536e+07	0.500305	0.914	0.77	0.0106253	12	ECII
Gar1	1.21868e+06	0.498891	0.971	0.862	0.000225773	12	ECII
Nip7	4.63025e+06	0.497265	0.955	0.832	0.000857801	12	ECII
Rab5if	1138.4	0.496483	1	0.951	2.109e+07	12	ECII
Ebna1bp2	3.19028e+06	0.496383	0.988	0.901	0.000591031	12	ECII
Imp4	1.59652e+08	0.494885	0.778	0.657	0.295772	12	ECII
Yif1b	7.90741e+08	0.49185	0.922	0.769	1	12	ECII
Bin1	1.73162e+09	0.487968	0.782	0.645	0.3208	12	ECII
Ahsa1	6.18307e+06	0.485762	0.897	0.729	0.0114548	12	ECII
Nifk	9.31197e+08	0.485569	0.877	0.722	0.172514	12	ECII
Mrpl57	996946	0.483961	0.984	0.885	0.000184694	12	ECII
Chmp2a	1.43134e+07	0.483216	0.938	0.77	0.00265169	12	ECII
Gipc1	2.06863e+09	0.478944	0.938	0.791	0.383234	12	ECII
