# Supplementary material for: Wt1+/Itga4+ progenitors drive epicardial-derived cell expansion via non-canonical Wnt signalling
Source: Research Square preprint supplement (doi:10.21203/rs.3.rs-4842079/v1), 2024-08-07
Supplement: Supplementary file 11 [file Suppl. dataset 2 DEGs_PER.xlsx]

## Sheet: DEGs_selected_1_75%
Supplemental dataset 2. Differential gene expression analysis on PER (clusters 0 and 5).
gene	p_val	avg_log2FC	pct.1	pct.2	p_val_adj	cluster	cluster name
Lhx2	5.69509959661636e-193	1.56599	0.914	0.477	1.05507415126915e-188	0	PER1
Zeb2	5.5171702930913e-141	1.50292	0.886	0.641	1.02211096849809e-136	0	PER1
Hlx	2.79035703612147e-128	1.42778	0.784	0.397	5.16941544511864e-124	0	PER1
Hmcn1	3.56419654905242e-103	1.35196	0.761	0.436	6.60303052677452e-99	0	PER1
Des	1.447698546479e-132	1.34385	0.877	0.551	2.682006327207e-128	0	PER1
Tshz2	7.62548908323908e-128	1.27622	0.876	0.603	1.41269810756087e-123	0	PER1
Cdkn1c	7.71241502905385e-214	1.26103	1	0.966	1.42880200828252e-209	0	PER1
Capn6	4.37483455908258e-124	1.23641	0.909	0.675	8.10481850415639e-120	0	PER1
Prnp	9.39959206792728e-114	1.22506	0.855	0.548	1.74136842650421e-109	0	PER1
Apoe	5.83641180912596e-114	1.17666	0.888	0.657	1.08125365175868e-109	0	PER1
Asb4	5.16982856041033e-143	0.86507	0.999	0.931	9.57762439101618e-139	0	PER1
Foxf1	2.59934309916726e-80	0.856003	0.821	0.475	4.81554302551726e-76	0	PER1
Robo2	2.71842495523853e-69	0.826911	0.882	0.704	5.0361540720749e-65	0	PER1
Abcg2	1.5233562627991e-68	0.81827	0.876	0.707	2.82216981246161e-64	0	PER1
Plagl1	3.90982088650304e-146	0.798745	1	0.944	7.24333417433553e-142	0	PER1
Shisa3	4.16968518955507e-64	0.798499	0.802	0.522	7.72475878216972e-60	0	PER1
Cotl1	2.91062471334587e-61	0.787001	0.827	0.625	5.39222334394456e-57	0	PER1
Itm2a	1.67907829440065e-90	0.761702	0.995	0.946	3.11066044820665e-86	0	PER1
Nr2f1	6.87493284038561e-59	0.754569	0.877	0.635	1.27365005800984e-54	0	PER1
Rbp1	2.55803872402593e-48	0.722028	0.944	0.862	4.73902254013043e-44	0	PER1
6330403K07Rik	3.55597731642792e-88	0.70105	0.971	0.875	6.58780357641436e-84	0	PER1
Nr2f2	1.35434439888723e-84	0.625853	0.995	0.882	2.50905843337848e-80	0	PER1
Hand2	5.74083836916243e-71	0.615223	0.971	0.904	1.06354771627103e-66	0	PER1
Dlk1	7.64842821204736e-99	0.608599	1	0.974	1.41694781056389e-94	0	PER1
Acaa2	1.09573975902948e-29	0.60816	0.806	0.717	2.02996747757802e-25	0	PER1
Unc119	7.41393607835563e-36	0.597406	0.822	0.725	1.37350579787616e-31	0	PER1
Ccnd2	1.31242457451681e-35	0.594931	0.904	0.809	2.43139776674985e-31	0	PER1
Sox11	2.38268467985293e-75	0.59258	0.998	0.875	4.41416163789554e-71	0	PER1
Hsd11b2	2.00355483981545e-31	0.543075	0.772	0.611	3.7117856962421e-27	0	PER1
F2r	4.64803954787018e-29	0.529847	0.838	0.693	8.6109580663843e-25	0	PER1
Kcnq1ot1	1.46266853340114e-32	0.517784	0.954	0.899	2.70973972497894e-28	0	PER1
Sfr1	2.34660756009464e-117	0.512745	0.999	0.999	4.34732516583133e-113	0	PER1
Limd2	7.71294124352973e-57	0.500377	0.984	0.922	1.42889949477632e-52	0	PER1
Mfap2	2.63647233127903e-55	0.498233	0.982	0.927	4.88432864092752e-51	0	PER1
Cdh2	5.21140079280619e-24	0.49254	0.866	0.809	9.65464110875274e-20	0	PER1
Cyba	1.61740585669017e-18	0.480432	0.773	0.721	2.99640609010421e-14	0	PER1
Hmga2	8.19007024551154e-54	0.466685	1	0.997	1.51729241368347e-49	0	PER1
Tle5	1.54463661041841e-33	0.453719	0.917	0.815	2.86159378446115e-29	0	PER1
Nme4	1.12571686983573e-31	0.451676	0.898	0.84	2.08550307305768e-27	0	PER1
Phactr2	2.31787936950609e-20	0.440428	0.833	0.761	4.29410331994698e-16	0	PER1
Cited2	3.29784171394784e-20	0.435387	0.828	0.712	6.10958155925977e-16	0	PER1
Grcc10	2.35156033956234e-50	0.431556	0.992	0.973	4.35650068507319e-46	0	PER1
Ccnd3	1.64791430140524e-39	0.420391	0.977	0.952	3.05292603478334e-35	0	PER1
Pfkl	8.41894837037884e-27	0.414183	0.915	0.826	1.55969437509638e-22	0	PER1
Eva1b	6.85354734760964e-12	0.394918	0.76	0.697	1.26968818161816e-07	0	PER1
Fabp5	9.37385150062764e-60	0.385694	1	0.999	1.73659972900628e-55	0	PER1
Nrbp1	8.56656794704881e-16	0.383515	0.803	0.742	1.58704237787026e-11	0	PER1
Psme2	5.29792096129244e-18	0.372577	0.82	0.773	9.81492837289037e-14	0	PER1
Gpc6	2.83823747753083e-13	0.369981	0.787	0.702	5.25811875087361e-09	0	PER1
Phlda1	3.1473037971145e-16	0.368561	0.764	0.664	5.83069501453432e-12	0	PER1
Cd63	9.44957589403267e-28	0.368113	0.949	0.919	1.75062843012849e-23	0	PER1
Hoxb4	2.88169171846377e-16	0.367463	0.814	0.702	5.33862207762598e-12	0	PER1
Gnas	1.09140002100813e-84	0.356356	1	1	2.02192767891965e-80	0	PER1
Mcm6	1.10388881166172e-11	0.35244	0.812	0.779	2.04506441248451e-07	0	PER1
Rdx	2.71371717139091e-42	0.348874	0.998	0.996	5.0274324317188e-38	0	PER1
Scand1	1.98691341956006e-43	0.346927	0.994	0.988	3.68095580107696e-39	0	PER1
Akt1	4.28507467804742e-16	0.343494	0.848	0.809	7.93852934855065e-12	0	PER1
Ier2	9.84744581155519e-16	0.335061	0.841	0.76	1.82433781104871e-11	0	PER1
Snhg8	3.44642716525169e-10	0.318476	0.758	0.721	6.38485096634529e-06	0	PER1
Sept9	5.87871944541757e-08	0.312742	0.769	0.748	0.00108909	0	PER1
Usp29	4.31936344799813e-09	0.304654	0.783	0.749	8.00205272376134e-05	0	PER1
Hoxb2	8.39689283264799e-11	0.301816	0.794	0.699	1.55560836617637e-06	0	PER1
Psme1	7.29441637256588e-13	0.301114	0.852	0.796	1.35136357718155e-08	0	PER1
Rcn2	7.00022297310412e-20	0.291954	0.95	0.917	1.29686130799727e-15	0	PER1
Zfpm1	1.77631302995866e-08	0.291731	0.77	0.711	0.00032908	0	PER1
Csrp2	2.63594479975575e-34	0.290322	0.999	0.936	4.88335133602751e-30	0	PER1
Ppdpf	8.96449710403238e-21	0.289485	0.959	0.938	1.66076273349304e-16	0	PER1
Pigx	9.10291040483016e-08	0.288731	0.755	0.707	0.00168641	0	PER1
Nnat	1.02587466775987e-27	0.286812	0.996	0.968	1.90053540949194e-23	0	PER1
Golga7	1.37422045033408e-07	0.285972	0.793	0.766	0.00254588	0	PER1
Sh3bgrl	9.91836146447706e-13	0.285636	0.889	0.866	1.83747564490902e-08	0	PER1
Nrp1	1.30467809361427e-19	0.28438	0.953	0.887	2.41704663622979e-15	0	PER1
Peg3	9.40098275079599e-38	0.281392	1	1	1.74162606441247e-33	0	PER1
Hand2os1	1.44003692231281e-07	0.278342	0.792	0.749	0.00266781	0	PER1
Ptprs	5.12278294934572e-10	0.275676	0.827	0.776	9.49046769195788e-06	0	PER1
Maged2	7.77378000077227e-19	0.272784	0.988	0.965	1.44017048294307e-14	0	PER1
Rian	1.26417619230377e-16	0.271478	0.933	0.871	2.34201281386197e-12	0	PER1
Alcam	1.89600313324495e-14	0.27058	0.946	0.918	3.51253540464959e-10	0	PER1
Baz2b	8.20048129890814e-07	0.270276	0.761	0.746	0.0151922	0	PER1
Dnmt3a	1.22914711910506e-08	0.26905	0.811	0.782	0.000227712	0	PER1
Gm1673	7.76305927528902e-19	0.26552	0.975	0.933	1.43818436134004e-14	0	PER1
Tmem59	2.00177998764511e-11	0.26517	0.891	0.884	3.70849760511133e-07	0	PER1
H2afy2	3.60587671656481e-19	0.261993	0.972	0.942	6.68024720510797e-15	0	PER1
Ifitm2	1.53852735315361e-36	0.261928	1	0.999	2.85027577445238e-32	0	PER1
Itm2b	2.57668379906682e-15	0.261219	0.937	0.913	4.77356440615119e-11	0	PER1
Nfib	3.07599741962976e-10	0.259363	0.891	0.866	5.6985928196061e-06	0	PER1
Idh2	4.5861464027537e-13	0.255735	0.929	0.91	8.49629482574150e-09	0	PER1
Ndufa6	6.76288997874977e-18	0.254561	0.984	0.97	1.25289299746318e-13	0	PER1
Dynlrb1	4.23530026972422e-20	0.253591	0.984	0.978	7.84631727969108e-16	0	PER1
Ndufv2	1.66788981168021e-13	0.251805	0.964	0.95	3.08993266511876e-09	0	PER1
Bzw2	4.94518300948833e-15	0.251568	0.967	0.959	9.16144604337808e-11	0	PER1
Pigp	1.24651359283024e-05	0.251149	0.761	0.763	0.230929	0	PER1
Aamp	6.35344313325383e-10	0.250356	0.908	0.903	1.1770388748666e-05	0	PER1
Lhx9	0	4.96118	0.796	0.058	0	1	PER2
Itga4	0	4.39716	0.855	0.16	0	1	PER2
Scx	0	4.1225	0.789	0.084	0	1	PER2
Lrrn4	0	4.03163	0.803	0.093	0	1	PER2
Myl7	1.46494195376955e-268	3.77854	0.925	0.504	2.71395146355348e-264	1	PER2
Sox9	0	3.47479	0.968	0.316	0	1	PER2
Upk3b	0	3.05556	0.835	0.177	0	1	PER2
Mical2	0	3.0553	0.867	0.216	0	1	PER2
Tbx18	0	2.85651	0.99	0.322	0	1	PER2
Aplp1	1.86125521262908e-287	2.62289	0.874	0.294	3.44816140691663e-283	1	PER2
Atp1b1	0	2.55234	0.925	0.316	0	1	PER2
Mgarp	2.50141232347011e-267	2.43337	0.893	0.327	4.63411647046072e-263	1	PER2
Ddr1	6.07088251664903e-228	2.3895	0.783	0.257	1.1246916950344e-223	1	PER2
Sdc4	4.27098469614454e-256	2.35824	0.873	0.342	7.91242624807738e-252	1	PER2
Prxl2a	8.55622693947771e-276	2.30047	0.937	0.483	1.58512660280764e-271	1	PER2
Stk26	1.20941918394931e-301	2.27697	0.963	0.434	2.24056998018449e-297	1	PER2
Tnnt2	2.6122852740058e-167	2.27431	0.758	0.298	4.83951969862315e-163	1	PER2
Podxl	5.07746430659728e-257	2.19849	0.874	0.293	9.40651037440213e-253	1	PER2
Hey1	7.80091003101896e-219	2.1414	0.807	0.265	1.44519659234657e-214	1	PER2
Creb5	4.02236781722274e-200	2.01165	0.839	0.328	7.45183861818685e-196	1	PER2
Pdlim1	1.75147968248035e-163	1.99657	0.759	0.318	3.24479125976309e-159	1	PER2
Dipk2a	6.1142119717789e-198	1.95368	0.849	0.352	1.13271890989176e-193	1	PER2
Igfbp5	1.67203562415805e-297	1.95047	0.999	0.851	3.0976131973152e-293	1	PER2
Sfrp5	1.61676013396451e-224	1.8956	0.912	0.365	2.99520982418265e-220	1	PER2
Gadd45g	1.2998963654759e-154	1.86048	0.819	0.396	2.40818800668066e-150	1	PER2
Celf2	1.56611373754723e-177	1.85691	0.855	0.401	2.90138231017999e-173	1	PER2
Lpl	1.74795786067617e-251	1.82031	0.972	0.562	3.23826673268868e-247	1	PER2
Pim3	1.76415471363818e-141	1.73104	0.756	0.334	3.26827302248609e-137	1	PER2
P3h4	1.74435175783604e-231	1.71893	0.966	0.598	3.23158606656705e-227	1	PER2
Dcn	2.03491781097388e-192	1.70951	0.756	0.233	3.7698887366102e-188	1	PER2
Ccnd1	1.19940438255932e-151	1.69462	0.887	0.571	2.22201655912939e-147	1	PER2
Pla2g12a	9.90447230048628e-221	1.67699	0.971	0.574	1.83490253838809e-216	1	PER2
Gucy1a1	1.12322898335916e-175	1.67603	0.893	0.521	2.08089401457118e-171	1	PER2
Rap2c	6.4918091348187e-187	1.66697	0.937	0.626	1.20267256031651e-182	1	PER2
Tcf21	5.37090711274533e-218	1.64499	0.98	0.662	9.950142517072e-214	1	PER2
Tmem108	1.50219230782876e-214	1.63475	0.967	0.643	2.78296146948356e-210	1	PER2
Gyg	9.19031777859931e-173	1.55889	0.958	0.654	1.70259827166331e-168	1	PER2
Frmd4b	4.55609864947294e-155	1.54036	0.882	0.489	8.44062835801357e-151	1	PER2
Wt1	3.00460649213679e-182	1.52985	0.952	0.572	5.56633398733262e-178	1	PER2
Rhou	6.52769065421057e-177	1.50928	0.937	0.61	1.20931997059905e-172	1	PER2
Flrt2	5.3024940228555e-182	1.47919	0.975	0.617	9.8234004267421e-178	1	PER2
Csrp1	8.30054495465105e-154	1.45392	0.901	0.581	1.53775895829865e-149	1	PER2
Smim1	1.32470348445992e-214	1.44181	0.984	0.776	2.45414567531045e-210	1	PER2
Bex1	1.0509060135306e-196	1.42396	0.982	0.883	1.94690848066678e-192	1	PER2
Wsb2	9.46255280315612e-105	1.42187	0.755	0.411	1.7530325323127e-100	1	PER2
Plp2	4.36065129450604e-191	1.39298	0.967	0.675	8.0785425882019e-187	1	PER2
Ezr	1.75639992013092e-152	1.37037	0.935	0.605	3.25390649203454e-148	1	PER2
C430049B03Rik	2.36301701497444e-142	1.33809	0.937	0.654	4.37772532194164e-138	1	PER2
Phgdh	9.5689756478942e-126	1.33123	0.911	0.647	1.77274842852888e-121	1	PER2
Myl4	1.44197183204959e-151	1.32194	0.989	0.749	2.67139701605506e-147	1	PER2
Ppp1r12a	3.37774196157913e-189	1.31064	0.995	0.887	6.2576047580215e-185	1	PER2
Ralb	6.16267494152462e-118	1.27232	0.902	0.611	1.14169715966685e-113	1	PER2
Map3k4	5.28823243035127e-97	1.27173	0.83	0.561	9.79697940046876e-93	1	PER2
Cgnl1	2.92616280750344e-105	1.25629	0.845	0.525	5.42100921718087e-101	1	PER2
Ado	9.99859090845107e-101	1.25482	0.805	0.459	1.85233895169964e-96	1	PER2
Ppfibp1	2.88081172005772e-113	1.22385	0.888	0.587	5.33699179257893e-109	1	PER2
Bex4	1.16955065006153e-177	1.19142	0.989	0.907	2.16670953430398e-173	1	PER2
Hcfc1r1	6.8362347957607e-84	1.17836	0.826	0.551	1.26648085826263e-79	1	PER2
Slc1a3	2.5892683689854e-96	1.16507	0.821	0.465	4.79687858038236e-92	1	PER2
Krt18	1.16314924485741e-116	1.14141	0.89	0.551	2.15485029102283e-112	1	PER2
Pls3	1.4608114919024e-121	1.11316	0.934	0.639	2.70629936989839e-117	1	PER2
Nectin2	9.95056440797465e-103	1.11249	0.883	0.606	1.84344156222138e-98	1	PER2
Tagln2	2.03369198716634e-85	1.1064	0.862	0.605	3.76761777542436e-81	1	PER2
Rnd3	2.64050114877203e-87	1.0965	0.825	0.501	4.89179242821506e-83	1	PER2
Dctn6	2.23064943064696e-99	1.09199	0.9	0.657	4.13250113521656e-95	1	PER2
Degs1	1.93923861420348e-113	1.04061	0.939	0.727	3.59263345667337e-109	1	PER2
Zyx	1.21281046059818e-107	1.03459	0.931	0.712	2.24685265930419e-103	1	PER2
Akap12	6.10676157536582e-49	1.03022	0.778	0.553	1.13133864945227e-44	1	PER2
Slc16a3	6.81725334972304e-127	1.02143	0.98	0.767	1.26296435556969e-122	1	PER2
S100a10	3.74010523518485e-136	1.01477	0.992	0.926	6.92891895870346e-132	1	PER2
Nfia	7.72231071826823e-64	1.00356	0.76	0.493	1.43063528366637e-59	1	PER2
Atp1a1	5.47121864257631e-92	0.975934	0.902	0.691	1.01359796572369e-87	1	PER2
Myrf	8.89572701199355e-102	0.972821	0.931	0.688	1.64802238624193e-97	1	PER2
Rras2	6.74886404802285e-76	0.972467	0.835	0.564	1.25029455353671e-71	1	PER2
Tmem98	1.25453211721358e-83	0.970102	0.859	0.574	2.32414620034987e-79	1	PER2
Cd2ap	3.92422839766858e-85	0.962433	0.905	0.688	7.27002552952082e-81	1	PER2
Alad	1.27177590693594e-97	0.951675	0.953	0.81	2.35609204518953e-93	1	PER2
Suclg2	1.13009680879532e-61	0.950858	0.759	0.482	2.09361734797421e-57	1	PER2
Atp2a2	7.81999688015418e-72	0.949262	0.914	0.735	1.44873262201736e-67	1	PER2
Ugp2	1.56522667473537e-100	0.947538	0.938	0.713	2.89973893761474e-96	1	PER2
Kmt5a	1.38882583722454e-102	0.919655	0.952	0.761	2.57293874604217e-98	1	PER2
Fbln2	8.02765019678256e-67	0.917222	0.843	0.602	1.48720247545594e-62	1	PER2
Soat1	3.37322342993074e-93	0.905988	0.947	0.79	6.2492337262897e-89	1	PER2
Aprt	4.604263765259e-179	0.901456	0.997	0.991	8.52985905151882e-175	1	PER2
Glipr2	8.32004664459885e-67	0.894787	0.808	0.531	1.54137184137838e-62	1	PER2
Ly6e	1.70458053173747e-46	0.888449	0.797	0.607	3.15790589309683e-42	1	PER2
Lbh	1.21148073758762e-57	0.87458	0.844	0.601	2.24438921445482e-53	1	PER2
1810037I17Rik	3.14092409181249e-120	0.873487	0.994	0.946	5.81887597249183e-116	1	PER2
Srm	2.70335526888095e-81	0.864386	0.938	0.805	5.00823597112885e-77	1	PER2
Cnn3	1.43910900375632e-164	0.850647	1	0.995	2.66609334035895e-160	1	PER2
Anxa5	6.04951561197515e-101	0.838936	0.978	0.865	1.12073326227452e-96	1	PER2
Lrrc42	3.64085603131691e-71	0.838207	0.888	0.672	6.74504988361771e-67	1	PER2
Pten	8.78838294250556e-44	0.828072	0.787	0.591	1.62813582392858e-39	1	PER2
B4galt6	4.50972750284819e-50	0.827435	0.769	0.52	8.35472117177656e-46	1	PER2
Tnni1	6.15695597416779e-94	0.826341	0.987	0.91	1.14063766377432e-89	1	PER2
App	5.52745601953336e-60	0.806748	0.902	0.711	1.02401650217875e-55	1	PER2
Anxa2	1.25840152183851e-81	0.804521	0.959	0.736	2.33131465935802e-77	1	PER2
Elovl6	3.66095035029856e-42	0.80335	0.768	0.551	6.78227661896311e-38	1	PER2
Rexo2	6.2273151957236e-60	0.80069	0.86	0.645	1.15367241315975e-55	1	PER2
S100a11	6.49037396053777e-100	0.798826	0.995	0.956	1.20240667992923e-95	1	PER2
Eno3	9.73123690909036e-64	0.993217	0.828	0.574	1.80280894977808e-59	2	PER3
Sfrp1	7.87357136275415e-122	0.992111	0.997	0.92	1.45865783066383e-117	2	PER3
Meis2	1.78957997630363e-93	0.98142	0.978	0.85	3.3153758641001e-89	2	PER3
Crabp2	3.66051023033844e-58	0.898738	0.83	0.557	6.78146125272499e-54	2	PER3
Prrx2	2.00181416025256e-43	0.80231	0.891	0.768	3.70856091328389e-39	2	PER3
Twist1	6.65987349051784e-47	0.759485	0.919	0.735	1.23380816285334e-42	2	PER3
Id1	2.21963636763935e-51	0.70251	0.973	0.863	4.11209833468866e-47	2	PER3
Pbx1	1.67371092056424e-41	0.697549	0.973	0.924	3.10071685143731e-37	2	PER3
Ptn	2.34382166539831e-81	0.689135	0.999	0.999	4.34216401731691e-77	2	PER3
Cdca7	3.65631557059203e-19	0.592562	0.761	0.648	6.7736902260788e-15	2	PER3
Mir99ahg	1.49419526018628e-20	0.576196	0.819	0.701	2.76814613902111e-16	2	PER3
Igdcc3	8.64999015363749e-24	0.564517	0.807	0.679	1.60249717586288e-19	2	PER3
Chd7	1.06966269279835e-22	0.551792	0.782	0.644	1.98165710467823e-18	2	PER3
Gas1	3.96578683775316e-28	0.53522	0.898	0.772	7.34701669562151e-24	2	PER3
Sox11	3.74719315875291e-37	0.482077	0.996	0.886	6.94205004590565e-33	2	PER3
Flrt3	2.07354113914609e-22	0.480238	0.892	0.799	3.84144231438205e-18	2	PER3
Jak1	4.13712974857595e-15	0.449911	0.792	0.695	7.66444657221181e-11	2	PER3
Acvr2b	4.87646575849734e-14	0.436259	0.758	0.628	9.03414046419218e-10	2	PER3
Metrn	1.21504530166961e-17	0.432914	0.822	0.703	2.25099292587312e-13	2	PER3
Sinhcaf	8.59861163881534e-20	0.428945	0.897	0.789	1.59297879220693e-15	2	PER3
Smarcd1	7.45419624481129e-16	0.42392	0.842	0.741	1.38096439631374e-11	2	PER3
Hdgfl3	3.34965114008774e-19	0.412443	0.865	0.766	6.20556370212655e-15	2	PER3
Id3	1.88329796758585e-40	0.410119	1	0.977	3.48899781474955e-36	2	PER3
Cd24a	2.61195194797872e-29	0.410044	0.984	0.923	4.83890217882538e-25	2	PER3
Prdx6	8.89714759141282e-28	0.402209	0.982	0.954	1.64828556278514e-23	2	PER3
Rrm2	4.63807370331683e-13	0.397521	0.842	0.762	8.59249534276477e-09	2	PER3
Tfdp2	9.00960544883487e-09	0.396181	0.767	0.707	0.000166912	2	PER3
Nasp	9.03836401567254e-51	0.393376	1	0.999	1.6744473175435e-46	2	PER3
Isoc1	6.41012898086557e-15	0.384526	0.849	0.726	1.18754049499516e-10	2	PER3
Mrpl23	3.13665856255454e-25	0.376722	0.94	0.906	5.81097365298854e-21	2	PER3
Txnrd1	4.28672558335196e-17	0.375563	0.924	0.858	7.94158781571783e-13	2	PER3
Slc38a1	3.52975484130413e-10	0.367833	0.753	0.672	6.53922381900003e-06	2	PER3
Lyar	4.75011628315675e-17	0.359317	0.927	0.882	8.80006542617619e-13	2	PER3
Vcan	1.86327727250638e-08	0.351649	0.849	0.771	0.000345191	2	PER3
Ivns1abp	1.4295528707226e-10	0.351476	0.789	0.708	2.6483896483007e-06	2	PER3
Meis1	8.97228126772267e-10	0.348554	0.813	0.713	1.6622048276583e-05	2	PER3
Mcm7	5.04794970618529e-17	0.344006	0.936	0.884	9.35183162567887e-13	2	PER3
Psip1	2.95213785001833e-31	0.342326	0.999	0.991	5.46913058094396e-27	2	PER3
Fscn1	1.08006233581991e-17	0.339474	0.922	0.859	2.00092348333996e-13	2	PER3
Mcm5	4.11528884977063e-11	0.331431	0.854	0.768	7.62398412308507e-07	2	PER3
Hells	2.63694407669624e-13	0.327771	0.883	0.8	4.88520259648745e-09	2	PER3
mt-Cytb	2.14160664585373e-44	0.320721	1	0.998	3.96754047210862e-40	2	PER3
Casp8ap2	4.95071026964626e-08	0.317786	0.789	0.733	0.000917169	2	PER3
Set	2.24149055498975e-53	0.31624	1	1	4.15258540217401e-49	2	PER3
Rcc2	6.68966758968467e-17	0.316033	0.975	0.934	1.23932781766498e-12	2	PER3
Pcbp4	2.34281975911378e-13	0.307966	0.919	0.878	4.34030788573420e-09	2	PER3
mt-Atp6	5.26221571563712e-32	0.307856	1	0.997	9.74878083478934e-28	2	PER3
Bccip	8.40326532725314e-08	0.302809	0.789	0.733	0.00155679	2	PER3
Cdk2ap1	7.79468795974395e-18	0.30219	0.967	0.934	1.44404389142216e-13	2	PER3
Jun	3.37897346525608e-14	0.297267	0.945	0.867	6.25988624173342e-10	2	PER3
Hmgb3	1.36873849053886e-28	0.292859	1	0.996	2.5357249275723e-24	2	PER3
Zmiz1	1.53540771164789e-06	0.285392	0.879	0.848	0.028445	2	PER3
mt-Nd4l	6.75162346387933e-07	0.283841	0.753	0.688	0.0125081	2	PER3
Hnrnph2	5.33799323958523e-07	0.283068	0.779	0.721	0.00988917	2	PER3
mt-Nd1	4.58429391121e-26	0.282914	1	0.997	8.49286289990765e-22	2	PER3
Mcm3	1.68154682705208e-05	0.282024	0.816	0.787	0.311523	2	PER3
Znrd1	2.95829629433392e-08	0.280891	0.819	0.761	0.000548054	2	PER3
Pcolce	7.49143132708189e-10	0.278906	0.761	0.653	1.38786256765519e-05	2	PER3
Mfap4	1.64885405420129e-06	0.278893	0.783	0.692	0.0305467	2	PER3
Ptbp2	1.15677068682353e-06	0.277859	0.756	0.685	0.0214303	2	PER3
1110038B12Rik	3.15477508507881e-13	0.275432	0.969	0.937	5.844536322617e-09	2	PER3
H2afy	8.31122045706391e-25	0.273664	1	0.997	1.53973670187566e-20	2	PER3
mt-Nd4	1.37425518228204e-27	0.271343	1	0.994	2.5459451506957e-23	2	PER3
Ptma	2.0755752743946e-70	0.266777	1	1	3.84521075334344e-66	2	PER3
Phc2	7.68594388919982e-07	0.262578	0.783	0.708	0.014239	2	PER3
Zfp422	2.98237777910796e-07	0.2614	0.812	0.755	0.00552515	2	PER3
Gtpbp4	1.28802694810336e-06	0.257224	0.874	0.844	0.023862	2	PER3
Gar1	1.94105951523065e-06	0.255611	0.837	0.806	0.0359601	2	PER3
Hipk2	2.08914064945542e-05	0.255437	0.818	0.781	0.387034	2	PER3
Enah	1.26916102458485e-05	0.255409	0.816	0.776	0.235125	2	PER3
Fkbp4	7.98499753764967e-18	0.253608	0.999	0.995	1.47930064382498e-13	2	PER3
Arglu1	4.59208039637746e-16	0.252618	0.991	0.983	8.50728814232889e-12	2	PER3
Atf4	6.54770363054284e-08	0.252551	0.876	0.82	0.00121303	2	PER3
Myrf	1.81004251889961e-07	0.251895	0.818	0.716	0.00335328	2	PER3
Ctxn1	1.3567538998472e-08	0.2508	0.836	0.756	0.000251352	2	PER3
Postn	0	4.41295	0.986	0.357	0	3	PER4
Lum	0	4.12047	0.85	0.18	0	3	PER4
Hand1	1.25412397961927e-266	2.70891	0.926	0.373	2.32339008464266e-262	3	PER4
Col3a1	0	2.36617	1	0.902	0	3	PER4
Col1a1	6.19524982984395e-237	2.18704	0.995	0.813	1.14773198347689e-232	3	PER4
Pitx2	1.84269712489214e-172	2.02186	0.841	0.359	3.41378069357517e-168	3	PER4
Acta2	2.39823474289274e-184	1.90634	0.955	0.612	4.44296968468309e-180	3	PER4
Col1a2	1.5614831167228e-204	1.79169	0.994	0.876	2.89280362204067e-200	3	PER4
Ahnak	1.35352136914886e-135	1.74225	0.887	0.559	2.50753368848519e-131	3	PER4
Krt8	7.21991212102411e-163	1.7102	0.979	0.782	1.33756091954093e-158	3	PER4
Col5a2	1.93109190839935e-167	1.5967	0.964	0.733	3.57754086950063e-163	3	PER4
Tubb2a	3.33255591731932e-144	1.56115	0.926	0.664	6.17389309242578e-140	3	PER4
Col5a1	3.75165653060855e-110	1.54853	0.827	0.495	6.9503188886054e-106	3	PER4
Mab21l2	3.93265388701957e-141	1.39124	0.934	0.595	7.28563459109245e-137	3	PER4
Hsd11b2	1.52251738533471e-79	1.27186	0.85	0.611	2.82061570807109e-75	3	PER4
Adamts9	4.22263252791e-89	1.25388	0.883	0.655	7.82284902120607e-85	3	PER4
Ifitm1	3.18036338153784e-76	1.25204	0.774	0.437	5.89194120063701e-72	3	PER4
Ncam1	4.12199542249419e-70	1.22952	0.802	0.539	7.63640871971274e-66	3	PER4
Krt18	1.35401265654301e-40	1.18596	0.779	0.582	2.50844384751159e-36	3	PER4
Fn1	2.36757196168359e-125	1.17566	0.994	0.935	4.38616381621502e-121	3	PER4
Akap12	3.32357830461473e-70	1.11436	0.823	0.553	6.15726116712925e-66	3	PER4
Cald1	1.32285484867853e-179	0.974561	1	0.994	2.45072089266184e-175	3	PER4
Zfhx3	3.63570702393363e-92	0.96936	0.943	0.822	6.73551083253945e-88	3	PER4
Col18a1	7.56084462425914e-82	0.94605	0.949	0.786	1.40072207509025e-77	3	PER4
Nnat	1.27595068196425e-128	0.94212	0.998	0.97	2.36382623340697e-124	3	PER4
Cthrc1	9.90802832140576e-44	0.913835	0.75	0.497	1.83556132682363e-39	3	PER4
Ndn	6.07122994412621e-91	0.892277	0.989	0.945	1.12475605944882e-86	3	PER4
Adamts1	1.68675419674939e-41	0.880649	0.798	0.602	3.12488082489792e-37	3	PER4
Pmp22	1.68270912857181e-91	0.87051	0.997	0.904	3.11738693159213e-87	3	PER4
Csrp2	5.1611771348609e-109	0.861273	1	0.941	9.5615967600433e-105	3	PER4
Cmtm7	1.35307914117129e-49	0.83269	0.829	0.634	2.50671441693392e-45	3	PER4
Rrbp1	2.59060724676523e-124	0.825382	0.998	0.988	4.79935898535727e-120	3	PER4
Sox4	4.36596552886417e-77	0.812871	0.989	0.94	8.08838773877376e-73	3	PER4
Rcn3	2.58039707663173e-92	0.803153	0.992	0.932	4.78044362416795e-88	3	PER4
Ppic	2.79592703308949e-80	0.789877	0.979	0.903	5.17973442150159e-76	3	PER4
Ddt	2.49170244249576e-57	0.788798	0.976	0.925	4.61612794496765e-53	3	PER4
Bbx	2.13765714224817e-41	0.7473	0.878	0.736	3.96022362172895e-37	3	PER4
Lgals1	5.1247591964753e-48	0.716543	0.994	0.99	9.49412888739013e-44	3	PER4
Anxa2	1.64450898826674e-35	0.708887	0.889	0.755	3.04661735166295e-31	3	PER4
Tubb2b	1.72452479814172e-57	0.703864	0.968	0.869	3.19485464103735e-53	3	PER4
Cdh11	1.39656645127903e-33	0.700441	0.808	0.614	2.58727900763953e-29	3	PER4
Rian	1.23791843686916e-58	0.694328	0.971	0.87	2.2933676961438e-54	3	PER4
Pofut2	1.89826133171825e-35	0.684456	0.833	0.675	3.51671894314122e-31	3	PER4
Dlk1	2.07885566607701e-85	0.681581	1	0.976	3.85128800697426e-81	3	PER4
Gng12	9.97091151965297e-29	0.678485	0.788	0.669	1.84721106813091e-24	3	PER4
Tcf4	1.49971147655918e-41	0.674184	0.907	0.816	2.77836548147354e-37	3	PER4
Fbln1	8.78580875417267e-40	0.670692	0.892	0.785	1.62765892979803e-35	3	PER4
Tmsb4x	2.48919774399131e-97	0.65959	1	1	4.6114877405183e-93	3	PER4
Nrp1	8.23048490728797e-33	0.657689	0.905	0.901	1.52477963392417e-28	3	PER4
Gpx3	5.86854998977461e-32	0.657565	0.908	0.824	1.08720757110565e-27	3	PER4
Tiparp	1.07438091044607e-27	0.652156	0.83	0.701	1.99039807469239e-23	3	PER4
Gas1	2.24368557161559e-26	0.647204	0.88	0.775	4.15665188997504e-22	3	PER4
Sept11	6.40181836549515e-36	0.634901	0.901	0.791	1.18600087039163e-31	3	PER4
Htatsf1	7.15602968377364e-26	0.630026	0.842	0.734	1.3257260592159e-21	3	PER4
S100a10	9.37959867760423e-62	0.607315	0.986	0.929	1.73766445101296e-57	3	PER4
Psap	7.09310299959185e-35	0.604018	0.878	0.763	1.31406826170439e-30	3	PER4
Meg3	9.75854061641583e-70	0.59623	1	0.99	1.8078672345972e-65	3	PER4
Serpinh1	3.16879059239322e-120	0.586984	1	1	5.87050145146768e-116	3	PER4
Klf6	4.22596146140736e-20	0.583064	0.785	0.691	7.82901620340327e-16	3	PER4
Ckap4	4.96850402511285e-55	0.583044	0.982	0.945	9.20465055692407e-51	3	PER4
Kdelr2	1.09995169624126e-58	0.580101	0.995	0.962	2.03777051245655e-54	3	PER4
Sparc	6.41921535703485e-73	0.565169	1	0.999	1.18922383704428e-68	3	PER4
Lman1	3.24731640915819e-41	0.553029	0.968	0.926	6.01597837960646e-37	3	PER4
Dap	3.39932439268357e-19	0.527008	0.767	0.663	6.29758836988558e-15	3	PER4
Tmem108	2.49795402860539e-26	0.5178	0.871	0.67	4.62770963339435e-22	3	PER4
P4hb	7.46934914301492e-55	0.500934	0.998	0.985	1.38377162223494e-50	3	PER4
1810058I24Rik	4.22473541525579e-57	0.496963	0.997	0.99	7.82674483030288e-53	3	PER4
Laptm4a	2.40631857859379e-55	0.493912	1	0.986	4.45794579870286e-51	3	PER4
Pkdcc	5.09214353983113e-15	0.485026	0.913	0.93	9.43370512189116e-11	3	PER4
Yipf5	1.13727177708703e-17	0.484664	0.833	0.716	2.10690969423144e-13	3	PER4
Sar1a	3.34120825678638e-27	0.482511	0.938	0.886	6.18992241652245e-23	3	PER4
Pdia6	1.63843179097345e-61	0.481725	1	0.999	3.03535873595741e-57	3	PER4
Pdia4	5.5682322820501e-25	0.481007	0.925	0.861	1.0315707125726e-20	3	PER4
S100a11	3.82484540115112e-43	0.480979	0.994	0.958	7.08590859017257e-39	3	PER4
Sap30l	5.12337607719819e-19	0.479368	0.808	0.693	9.49156652061737e-15	3	PER4
Amer1	1.11298292887609e-18	0.477887	0.829	0.726	2.06191217403585e-14	3	PER4
Mfap2	1.34637670571418e-39	0.477303	0.982	0.932	2.49429748500609e-35	3	PER4
Basp1	5.44725071451028e-43	0.476013	0.998	0.994	1.00915766737017e-38	3	PER4
Flna	6.1032194163863e-34	0.475982	0.982	0.952	1.13068242907973e-29	3	PER4
Mlec	2.50471695270298e-28	0.47577	0.917	0.85	4.64023862657753e-24	3	PER4
Sec22b	1.85762226945743e-16	0.475613	0.802	0.712	3.44143101639683e-12	3	PER4
Cst3	7.85183017343977e-29	0.473048	0.986	0.968	1.45463005793145e-24	3	PER4
Copa	2.57294116216941e-18	0.460659	0.854	0.747	4.76663079703504e-14	3	PER4
Selenos	8.19148343127059e-20	0.459278	0.853	0.726	1.51755422047719e-15	3	PER4
Tpm2	2.53160592959716e-11	0.45801	0.773	0.715	4.69005314517169e-07	3	PER4
Ssr3	9.9183321335824e-37	0.45761	0.988	0.965	1.83747021106748e-32	3	PER4
Tmed1	1.00569296339177e-16	0.456907	0.789	0.688	1.8631467839796e-12	3	PER4
Hand2os1	6.85137525716341e-15	0.45266	0.821	0.747	1.26928578014209e-10	3	PER4
Ryk	9.64982258492634e-20	0.452237	0.848	0.761	1.78772613208345e-15	3	PER4
Chd3	8.1904228089556e-15	0.447506	0.806	0.745	1.51735772958711e-10	3	PER4
Myh10	6.97081611653284e-22	0.446502	0.977	0.963	1.29141339374887e-17	3	PER4
Calu	1.10479618278231e-24	0.445063	0.934	0.875	2.04674540822251e-20	3	PER4
Selenof	1.26260133926933e-52	0.44409	1	0.991	2.33909524113037e-48	3	PER4
Cnn2	5.5983243915623e-20	0.439492	0.907	0.845	1.03714557678083e-15	3	PER4
Slc39a7	1.33032554117162e-14	0.439302	0.77	0.679	2.46456109757454e-10	3	PER4
Lpp	7.29401967710543e-11	0.43606	0.761	0.685	1.35129008538055e-06	3	PER4
Cnih4	1.35450234341033e-24	0.4348	0.92	0.856	2.50935104140197e-20	3	PER4
Rpn1	1.25303170996219e-14	0.431977	0.836	0.772	2.32136654587594e-10	3	PER4
Parva	2.6233452786949e-15	0.431451	0.774	0.674	4.86000946331017e-11	3	PER4
Ssr2	4.57071363556528e-46	0.428748	0.998	0.995	8.46770408124824e-42	3	PER4
Hist1h1b	1.13447342280472e-125	1.89914	0.873	0.602	2.10172546308803e-121	4	PER5
Nusap1	6.06304702627292e-156	1.73973	0.871	0.4	1.12324009208732e-151	4	PER5
Mis18bp1	3.14370928002525e-143	1.64658	0.823	0.337	5.82403581217478e-139	4	PER5
Top2a	1.21660659498327e-221	1.6403	1	0.809	2.25388537786601e-217	4	PER5
Aurkb	8.72961726984834e-162	1.61734	0.899	0.397	1.6172488954121e-157	4	PER5
Hist1h3c	1.13109809805934e-113	1.5816	0.796	0.389	2.09547233646473e-109	4	PER5
Hist1h2ap	2.97987049158764e-123	1.57226	0.897	0.593	5.52050807271527e-119	4	PER5
Hist1h1e	4.68449663657141e-110	1.53707	0.843	0.524	8.6784984689122e-106	4	PER5
Incenp	5.57470605168073e-153	1.52367	0.939	0.48	1.03277004313437e-148	4	PER5
Prc1	2.89195364600948e-142	1.49276	0.909	0.43	5.35763332459716e-138	4	PER5
Kif11	3.17072714777992e-127	1.44889	0.835	0.368	5.87408911397709e-123	4	PER5
Ndc80	1.25079722466695e-106	1.4234	0.762	0.345	2.317226938418e-102	4	PER5
Sgo2a	1.628519017623e-105	1.41971	0.787	0.362	3.01699433204837e-101	4	PER5
Aurka	1.06114954740331e-100	1.41656	0.752	0.345	1.96588565151937e-96	4	PER5
Lhx2	1.28683882586424e-129	1.39964	0.921	0.515	2.3839976087961e-125	4	PER5
Mki67	5.45796729025281e-150	1.3831	0.967	0.645	1.01114302019223e-145	4	PER5
Ckap2l	6.08749336883812e-101	1.37742	0.776	0.367	1.12776902151095e-96	4	PER5
Spc25	3.85608004023832e-122	1.3666	0.89	0.453	7.14377388254551e-118	4	PER5
Fbxo5	2.15928129075438e-123	1.35103	0.905	0.473	4.00028451925156e-119	4	PER5
Shisa3	1.09221833472525e-107	1.31347	0.905	0.529	2.023443686912e-103	4	PER5
Plk1	4.93705722854519e-91	1.28938	0.793	0.411	9.14639222160282e-87	4	PER5
Cenpe	2.36205661929375e-103	1.26851	0.896	0.508	4.37594609290359e-99	4	PER5
Kif20b	7.33173743033819e-96	1.26622	0.831	0.446	1.35827767634445e-91	4	PER5
Hjurp	2.64517346512778e-98	1.24982	0.841	0.447	4.90044836149573e-94	4	PER5
Cdk1	5.54429969348128e-140	1.24255	0.994	0.698	1.02713696121434e-135	4	PER5
Ube2c	3.24855965092038e-106	1.24241	0.974	0.791	6.0182816092951e-102	4	PER5
Kif22	8.4535991132787e-89	1.22842	0.815	0.466	1.56611377172601e-84	4	PER5
Kif15	6.42320539528269e-87	1.17689	0.841	0.476	1.18996303153007e-82	4	PER5
Tk1	2.53531774058815e-66	1.14252	0.753	0.437	4.6969296462136e-62	4	PER5
Foxf1	2.00780336758073e-85	1.13394	0.865	0.498	3.71965651878006e-81	4	PER5
Cenpf	1.95673419921072e-87	1.1303	0.941	0.644	3.62504577745779e-83	4	PER5
Hmcn1	2.0875948647099e-64	1.08314	0.775	0.463	3.86747824636157e-60	4	PER5
Ccnb1	5.24604499676876e-75	1.065	0.879	0.569	9.71882296101381e-71	4	PER5
Hmmr	5.21845231319595e-76	1.0574	0.84	0.482	9.66770475542682e-72	4	PER5
Robo2	9.67812234432468e-101	1.04586	0.964	0.706	1.79296894550959e-96	4	PER5
Trim59	1.98431085657119e-69	1.03962	0.834	0.529	3.67613429288378e-65	4	PER5
Bub1	1.15210729015791e-63	1.03037	0.778	0.476	2.13439396574654e-59	4	PER5
Dbf4	3.02950046004951e-78	1.02518	0.88	0.574	5.61245255228771e-74	4	PER5
Tpx2	3.38448762055547e-83	1.00643	0.93	0.623	6.27010176584106e-79	4	PER5
Smc4	3.01125054381631e-137	1.00212	1	0.86	5.57864275747409e-133	4	PER5
Hlx	3.3465486258484e-66	0.992092	0.773	0.434	6.19981598424675e-62	4	PER5
Racgap1	2.68476684226486e-79	0.976974	0.915	0.644	4.97379905197988e-75	4	PER5
Gata5	9.89720492529734e-57	0.97462	0.778	0.486	1.83355618446058e-52	4	PER5
Alcam	3.47911342377428e-99	0.964204	0.983	0.914	6.44540552888423e-95	4	PER5
Clspn	3.84339929355135e-53	0.962192	0.797	0.495	7.12028153123324e-49	4	PER5
Bub3	6.38066847644362e-99	0.956205	0.973	0.841	1.18208264194595e-94	4	PER5
H1f0	2.47237514008171e-65	0.947932	0.927	0.757	4.58032218451538e-61	4	PER5
Tyms	5.42468988255204e-106	0.940152	0.977	0.863	1.00497804764159e-101	4	PER5
Prnp	5.5275399551345e-61	0.923802	0.859	0.575	1.02403205208822e-56	4	PER5
Ets1	1.47592546207708e-53	0.913428	0.766	0.457	2.73429951104399e-49	4	PER5
Cks2	2.0959692118977e-94	0.879602	0.991	0.929	3.88299256196168e-90	4	PER5
Nr2f2	1.40793428070334e-99	0.879215	0.998	0.891	2.608339048431e-95	4	PER5
Cdca8	4.2160854157307e-86	0.873535	0.976	0.755	7.81071984118269e-82	4	PER5
Atad2	3.80620261386757e-41	0.870006	0.84	0.662	7.05137096245105e-37	4	PER5
Capn6	4.23080060342126e-61	0.868775	0.909	0.696	7.83798119789824e-57	4	PER5
Nr2f1	2.92302140548207e-69	0.857759	0.93	0.647	5.41518945579607e-65	4	PER5
Gpc6	8.06084552249384e-67	0.854705	0.927	0.685	1.49335224149721e-62	4	PER5
Pclaf	2.83938406072502e-146	0.840809	1	0.979	5.26024291089918e-142	4	PER5
Cenph	1.39065712702147e-50	0.828182	0.821	0.56	2.57633139351998e-46	4	PER5
Smc2	3.21315539624729e-104	0.826823	0.998	0.873	5.95269168708773e-100	4	PER5
Tacc3	2.22664951955332e-45	0.819417	0.817	0.595	4.12509089992447e-41	4	PER5
Ccna2	3.79938298691359e-57	0.815937	0.9	0.601	7.03873692155611e-53	4	PER5
Arl6ip1	6.79140596394079e-41	0.801633	0.973	0.928	1.25817586887967e-36	4	PER5
Hs3st3b1	2.79219042520827e-38	0.799319	0.762	0.524	5.17281198174084e-34	4	PER5
Cdc20	1.19891928806693e-30	0.795537	0.75	0.532	2.22111787307279e-26	4	PER5
Abcg2	2.62120077662691e-55	0.790561	0.911	0.716	4.85603655877902e-51	4	PER5
Hoxb4	8.51447244724538e-57	0.788173	0.915	0.694	1.57739116557668e-52	4	PER5
Plagl1	3.33455976214449e-96	0.785698	0.998	0.949	6.17760541534889e-92	4	PER5
Des	1.85584174834056e-59	0.761455	0.882	0.579	3.43813242297571e-55	4	PER5
Hmgb2	5.39040606082108e-145	0.747611	1	0.999	9.98626626827714e-141	4	PER5
Cmc2	6.06486674976632e-49	0.744661	0.868	0.655	1.12357721406171e-44	4	PER5
Rrm2	1.47387176307509e-46	0.743685	0.923	0.748	2.73049482827291e-42	4	PER5
Hirip3	2.84833688343586e-32	0.709589	0.799	0.639	5.27682891025327e-28	4	PER5
Ckap5	2.42736471026783e-39	0.696753	0.856	0.676	4.49693586224219e-35	4	PER5
Brd8	6.59982810631071e-48	0.696376	0.899	0.71	1.22268415497512e-43	4	PER5
Asb4	7.36939688102616e-76	0.691761	0.998	0.937	1.36525446617891e-71	4	PER5
Auts2	2.31531184349479e-51	0.689234	0.955	0.828	4.28934672125844e-47	4	PER5
Cdca3	3.17178258048488e-40	0.682578	0.879	0.667	5.87604440860628e-36	4	PER5
Rrm1	1.5606365936691e-55	0.682191	0.95	0.785	2.89123535343137e-51	4	PER5
Cenpw	1.31081247974899e-53	0.678594	0.973	0.827	2.42841119998297e-49	4	PER5
Phlda1	2.5641248443441e-37	0.67857	0.867	0.655	4.75029768663188e-33	4	PER5
Tshz2	2.69105765994698e-41	0.67646	0.87	0.628	4.98545342081777e-37	4	PER5
Zeb2	1.31400304832363e-38	0.662494	0.871	0.665	2.43432204732435e-34	4	PER5
Cenpm	3.39594399316722e-29	0.660749	0.755	0.535	6.29132584174159e-25	4	PER5
Robo1	4.80936185524141e-34	0.656427	0.806	0.607	8.90982377302023e-30	4	PER5
H1fx	4.5990090062713e-52	0.654432	0.976	0.918	8.52012408501821e-48	4	PER5
Smad7	3.67806841134018e-36	0.650085	0.868	0.686	6.81398953884881e-32	4	PER5
Cdkn1c	3.81080276851093e-56	0.648805	1	0.969	7.05989320894334e-52	4	PER5
Rhno1	2.64131294217767e-33	0.647224	0.796	0.585	4.89329635667835e-29	4	PER5
Ubald2	3.16454575629653e-35	0.638635	0.884	0.732	5.86263746811496e-31	4	PER5
Apoe	1.6985135520571e-32	0.625822	0.862	0.682	3.14666620654098e-28	4	PER5
Hoxb2	4.37044589854046e-38	0.625277	0.894	0.69	8.09668807163606e-34	4	PER5
Dnmt1	5.04408090315808e-41	0.622756	0.929	0.786	9.34466428119067e-37	4	PER5
Cotl1	2.72014655698956e-34	0.622692	0.849	0.639	5.03934351147887e-30	4	PER5
Birc5	8.45379045019127e-60	0.608953	0.994	0.899	1.56614921880243e-55	4	PER5
Malat1	1.63534233163687e-90	0.583148	1	1	3.02963520359047e-86	4	PER5
Unc5c	3.88206619393575e-25	0.580234	0.759	0.599	7.19191583088538e-21	4	PER5
Ccdc34	1.54652206040713e-62	0.572399	0.992	0.932	2.86508676911025e-58	4	PER5
Rfc5	1.94452995177838e-24	0.57019	0.752	0.564	3.60243618866462e-20	4	PER5
Jpt1	1.37276533571687e-54	0.570185	0.994	0.98	2.54318506094907e-50	4	PER5
Vsnl1	2.04213945125779e-153	2.45021	0.884	0.291	3.78326754740018e-149	5	PER6
Myl4	1.5979601292718e-121	1.89204	0.989	0.775	2.96038093548893e-117	5	PER6
Mef2c	2.27291116725336e-84	1.73821	0.87	0.456	4.21079522845358e-80	5	PER6
Angpt1	1.43725710049819e-70	1.66131	0.83	0.449	2.66266250438295e-66	5	PER6
Tbx18	5.68593577212063e-91	1.39851	0.924	0.398	1.05337646114307e-86	5	PER6
Gyg	5.32858338379493e-85	1.3751	0.963	0.686	9.8717335768185e-81	5	PER6
Khdrbs3	1.45327399222041e-54	1.27075	0.881	0.662	2.69233539798753e-50	5	PER6
Lbh	1.11737161913562e-63	1.24589	0.929	0.62	2.07004266161064e-59	5	PER6
Flrt2	4.49714122172221e-71	1.21027	0.952	0.657	8.33140382736256e-67	5	PER6
Crabp2	9.50315813000684e-29	1.01095	0.79	0.581	1.76055507516507e-24	5	PER6
Acta2	2.18677473062645e-13	0.971636	0.779	0.653	4.05121886595856e-09	5	PER6
Ackr3	6.65351577044618e-28	0.951518	0.765	0.528	1.23263033163286e-23	5	PER6
Nfia	4.96412465287446e-25	0.916044	0.751	0.522	9.19653733191522e-21	5	PER6
Tnni1	1.33181204899164e-53	0.864793	0.983	0.919	2.4673150019619e-49	5	PER6
Gpx3	1.35336829774709e-45	0.848962	0.941	0.827	2.50725010840626e-41	5	PER6
Twist1	2.04584809317356e-43	0.84145	0.952	0.746	3.79013817741334e-39	5	PER6
Maged2	5.76258155387446e-55	0.817877	0.994	0.968	1.06757585867078e-50	5	PER6
Map1b	5.4851920079318e-55	0.812202	0.994	0.983	1.01618667138945e-50	5	PER6
Pla2g12a	1.38288573625222e-28	0.805548	0.833	0.628	2.56193411498087e-24	5	PER6
Nr2f1	7.76267623001548e-36	0.796576	0.938	0.668	1.43811339837267e-31	5	PER6
Tle5	7.50321606556478e-35	0.764303	0.96	0.827	1.39004580830653e-30	5	PER6
Ssbp2	2.62820433936254e-24	0.754446	0.844	0.684	4.86901135910304e-20	5	PER6
Tgfb2	1.84905529545228e-39	0.754358	0.98	0.882	3.42555984035488e-35	5	PER6
Cnn2	1.30891131363786e-36	0.752663	0.946	0.846	2.42488909964549e-32	5	PER6
Lpl	5.80998008978319e-25	0.739849	0.841	0.617	1.07635691143323e-20	5	PER6
Tpm1	4.32109677141946e-52	0.709431	1	1	8.00526387873168e-48	5	PER6
Mxd4	5.19380291087565e-19	0.699245	0.779	0.573	9.62203927268822e-15	5	PER6
Vcan	5.4036255873196e-26	0.685722	0.901	0.773	1.00107567630683e-21	5	PER6
Pdlim7	2.74139784177766e-24	0.684824	0.921	0.847	5.0787136416773e-20	5	PER6
Kitl	5.97409468659639e-10	0.653252	0.751	0.638	1.10676078163885e-05	5	PER6
Cited2	3.65483507360403e-15	0.642539	0.844	0.729	6.77094745735883e-11	5	PER6
Tcf21	2.91293414812618e-20	0.623557	0.881	0.704	5.39650180281855e-16	5	PER6
Rsrc1	4.69248856479738e-19	0.610832	0.878	0.774	8.69330431514362e-15	5	PER6
Unc5c	2.67493448366031e-13	0.608749	0.756	0.611	4.95558362442909e-09	5	PER6
Atp2a2	1.90001921755679e-15	0.600248	0.839	0.76	3.51997560244571e-11	5	PER6
Pbx3	9.78430507295969e-16	0.594027	0.89	0.812	1.81264035781651e-11	5	PER6
Abracl	4.81047977544088e-31	0.589786	0.992	0.986	8.91189483198177e-27	5	PER6
Igfbp5	1.44874270110903e-31	0.55095	0.986	0.868	2.68394072807459e-27	5	PER6
Pdcd4	3.66349438467854e-13	0.544105	0.776	0.629	6.78698969705547e-09	5	PER6
Myl7	1.20698990651268e-47	0.540539	0.87	0.554	2.2360695008054e-43	5	PER6
Casp6	1.36567419344955e-12	0.538148	0.819	0.723	2.53004801078464e-08	5	PER6
Dstn	6.51430656476537e-33	0.535789	0.997	0.988	1.20684043418843e-28	5	PER6
Flrt3	3.77484684842175e-17	0.519425	0.915	0.804	6.99328127138614e-13	5	PER6
Acaa2	1.03287122675951e-13	0.515027	0.844	0.728	1.91349723469468e-09	5	PER6
Psme1	9.86743010201387e-16	0.506229	0.873	0.803	1.82804010069909e-11	5	PER6
Ptn	7.70315787448749e-32	0.502952	1	0.999	1.42708702782755e-27	5	PER6
Prrx2	1.83188094318332e-17	0.502844	0.901	0.777	3.39374263534141e-13	5	PER6
Runx1t1	4.85512603199133e-15	0.486906	0.918	0.849	8.99460648686713e-11	5	PER6
Plin2	2.29710901917234e-09	0.471647	0.776	0.684	4.25562416891868e-05	5	PER6
Psme2	3.03474617588241e-12	0.462917	0.847	0.778	5.62217076543975e-08	5	PER6
Cotl1	7.16941590147185e-12	0.457494	0.819	0.657	1.32820598990668e-07	5	PER6
Mir99ahg	3.76965467157397e-12	0.454274	0.844	0.708	6.98366224455793e-08	5	PER6
Ctxn1	6.28914799098061e-12	0.451819	0.856	0.76	1.16512755680907e-07	5	PER6
Pcolce	4.82407976194153e-11	0.451575	0.807	0.657	8.93709016697289e-07	5	PER6
Ctsl	7.99671767547873e-12	0.443705	0.921	0.899	1.48147191655919e-07	5	PER6
Bnip3l	3.84310541813585e-22	0.426657	1	0.967	7.11973709763848e-18	5	PER6
Pdgfra	1.26316968457159e-10	0.424555	0.824	0.696	2.34014815763733e-06	5	PER6
Igf2r	1.98679506505276e-12	0.42434	0.949	0.918	3.68073653751673e-08	5	PER6
Myl6	5.64597134991543e-41	0.418432	1	1	1.04597265228533e-36	5	PER6
Des	3.50753327348983e-09	0.394368	0.756	0.613	6.49805614246726e-05	5	PER6
Eci2	2.04263787379493e-07	0.393732	0.768	0.681	0.00378419	5	PER6
Robo2	1.02906051757245e-09	0.386118	0.824	0.737	1.90643751485473e-05	5	PER6
Idh2	7.35871112054247e-15	0.384278	0.958	0.91	1.3632748221917e-10	5	PER6
Mpc2	3.21703628438327e-08	0.377439	0.87	0.821	0.000595988	5	PER6
Cd63	4.93471593199479e-13	0.376469	0.963	0.923	9.14205473561355e-09	5	PER6
Fbn2	3.911191403701e-09	0.370658	0.898	0.85	7.24587319449648e-05	5	PER6
Ogt	2.89948980183121e-05	0.367382	0.771	0.734	0.537159	5	PER6
Tpm2	0.000988099	0.35696	0.762	0.721	1	5	PER6
Dsp	4.66058963680807e-06	0.355221	0.827	0.772	0.0863421	5	PER6
Phlda1	0.0013594	0.351795	0.751	0.681	1	5	PER6
Reep5	2.34119008046012e-07	0.350366	0.858	0.811	0.00433729	5	PER6
Atp1a1	9.18065258190673e-06	0.349905	0.782	0.724	0.170081	5	PER6
Ccnd2	7.78144528646423e-08	0.345869	0.901	0.825	0.00144159	5	PER6
Jun	1.52450272869965e-07	0.342939	0.924	0.874	0.00282429	5	PER6
6330403K07Rik	2.38461469366466e-12	0.342421	0.96	0.891	4.41773718148315e-08	5	PER6
Sfrp1	9.71355999330916e-18	0.33619	0.997	0.926	1.79953412436046e-13	5	PER6
Flna	8.50991133453131e-11	0.331843	0.963	0.956	1.57654617383527e-06	5	PER6
Bex3	5.16854091544733e-22	0.326502	1	1	9.57523889995772e-18	5	PER6
Ldhb	1.85894343810604e-09	0.32376	0.932	0.869	3.44387861343524e-05	5	PER6
Wbp1	1.73785619474475e-05	0.323417	0.807	0.72	0.321955	5	PER6
Cox20	3.25114706876667e-05	0.321126	0.776	0.711	0.602308	5	PER6
Mrps36	8.21828286825387e-09	0.31903	0.949	0.923	0.000152252	5	PER6
Asb4	6.77049402164154e-14	0.313056	0.997	0.942	1.25430172244931e-09	5	PER6
Atox1	6.45758113857516e-14	0.311996	0.994	0.991	1.19633148173243e-09	5	PER6
Jund	6.46360335729456e-09	0.310474	0.992	0.981	0.000119745	5	PER6
Ptms	3.61739103842988e-15	0.306844	0.997	0.989	6.7015786377952e-11	5	PER6
Ppp1r12a	9.38649347867024e-13	0.305655	0.938	0.903	1.73894178185845e-08	5	PER6
Tenm3	1.91196641580984e-05	0.304488	0.785	0.668	0.354211	5	PER6
Ndufa6	6.4954204097556e-11	0.30368	0.977	0.973	1.20334158511132e-06	5	PER6
Mtch1	1.18651518278077e-11	0.299201	0.992	0.982	2.19813802761966e-07	5	PER6
Tsc22d1	5.12886495136729e-11	0.296737	0.997	0.988	9.50173520890304e-07	5	PER6
Lmo4	1.82990911536099e-05	0.295341	0.884	0.824	0.339009	5	PER6
Bex4	1.38101476381543e-06	0.294408	0.966	0.918	0.0255847	5	PER6
Hadh	7.43905441233842e-06	0.290787	0.915	0.887	0.137816	5	PER6
Capns1	2.79870500105647e-08	0.28966	0.949	0.932	0.000518488	5	PER6
Pfkl	2.02029306208546e-05	0.281254	0.875	0.843	0.374279	5	PER6
Mfap4	0.00220954	0.281238	0.765	0.701	1	5	PER6
Atp5o	3.04448116367135e-17	0.276668	1	1	5.64020580381754e-13	5	PER6
Gata6	1.44618737855541e-10	0.27381	0.992	0.978	2.67920673751176e-06	5	PER6
Gpc3	8.35131060652029e-13	0.272734	1	1	1.54716380296395e-08	5	PER6
Wnt2	1.66550083347143e-126	2.07557	0.956	0.439	3.08550684408917e-122	6	PER7
Gap43	9.28099088117954e-89	1.97104	0.814	0.348	1.71939637064732e-84	6	PER7
Tenm4	1.0127878774183e-94	1.94756	0.792	0.288	1.87629082170514e-90	6	PER7
Bmp4	9.86400424551138e-107	1.93357	0.946	0.49	1.82740542652344e-102	6	PER7
Tnc	7.22430119084377e-92	1.89007	0.899	0.471	1.33837403861572e-87	6	PER7
Tbx5	3.04907084972471e-75	1.74913	0.804	0.358	5.64870865619999e-71	6	PER7
Mpped2	1.09574510015898e-82	1.7014	0.893	0.45	2.02997737255453e-78	6	PER7
Tagln	2.29751041467256e-49	1.53652	0.842	0.511	4.25636779422239e-45	6	PER7
Sfrp5	2.16435802024454e-82	1.52091	0.921	0.427	4.00968966830503e-78	6	PER7
Mab21l2	2.10059131746723e-91	1.50075	0.972	0.621	3.89155547473978e-87	6	PER7
Serpinf1	1.8890327313933e-68	1.47847	0.858	0.481	3.49962203817924e-64	6	PER7
Acta2	3.90166191209753e-81	1.46709	0.978	0.639	7.22821885835188e-77	6	PER7
Lix1	2.89557802278877e-53	1.25186	0.77	0.369	5.36434784501848e-49	6	PER7
Tpm2	1.1713624453097e-56	1.22123	0.946	0.707	2.17006606618075e-52	6	PER7
Pcolce	1.41648714998826e-62	1.21006	0.934	0.649	2.62418409406825e-58	6	PER7
Twist1	1.88008092688295e-61	1.20548	0.968	0.747	3.48303792514335e-57	6	PER7
Smoc2	1.19699828109352e-53	1.19861	0.773	0.341	2.21755901555385e-49	6	PER7
Clmp	1.34890065917498e-40	1.18759	0.754	0.414	2.49897336118757e-36	6	PER7
Fbn1	1.239130228911e-36	1.12705	0.773	0.479	2.29561266208052e-32	6	PER7
Pls3	7.47244666167645e-56	1.11932	0.931	0.673	1.38434546854218e-51	6	PER7
Hmgcs1	1.05675851110174e-31	1.09089	0.814	0.588	1.95775081766708e-27	6	PER7
Sfrp1	1.98142583086351e-93	1.08854	1	0.926	3.67078949425774e-89	6	PER7
Pcdh7	1.01381302569142e-41	1.0873	0.808	0.46	1.87819001139593e-37	6	PER7
Crabp1	1.84912812907862e-51	1.07501	0.82	0.421	3.42569477193105e-47	6	PER7
Fdps	2.9877766065757e-38	1.05057	0.915	0.741	5.53515494134215e-34	6	PER7
Add3	7.90061033112722e-51	1.04141	0.934	0.703	1.46366706994463e-46	6	PER7
Pkdcc	6.22565472238307e-67	1.00918	0.987	0.923	1.15336479386869e-62	6	PER7
Ahnak	4.06402869227746e-37	0.973189	0.871	0.588	7.52901955531321e-33	6	PER7
Pcdh18	1.96020879187536e-31	0.959361	0.782	0.498	3.6314828078283e-27	6	PER7
Fdft1	3.29762781669188e-25	0.952425	0.757	0.513	6.10918529320337e-21	6	PER7
Ddt	3.41850896103567e-70	0.949355	1	0.927	6.33312970121469e-66	6	PER7
Col1a1	2.56438430842965e-67	0.928416	0.997	0.829	4.75077836979678e-63	6	PER7
Nxn	1.65324678701911e-27	0.918124	0.785	0.566	3.06280499763161e-23	6	PER7
Cyp51	1.68049979634787e-22	0.909549	0.751	0.527	3.11329392271407e-18	6	PER7
Rras2	9.003039087034e-34	0.900295	0.858	0.593	1.66790302126392e-29	6	PER7
Timp2	2.78341383984557e-31	0.891518	0.823	0.585	5.15655247969791e-27	6	PER7
Isoc1	2.19926371255492e-42	0.876157	0.95	0.729	4.07435595387925e-38	6	PER7
Anxa2	3.32733972551652e-46	0.848377	0.962	0.761	6.1642295754919e-42	6	PER7
Bambi	2.18729852102778e-57	0.844733	1	0.966	4.05218924005606e-53	6	PER7
Tubb6	5.75403924570895e-23	0.827568	0.76	0.496	1.06599331066004e-18	6	PER7
Adamts1	3.282447088123e-25	0.826876	0.849	0.614	6.08106147545667e-21	6	PER7
Tmsb4x	2.15134793144615e-81	0.819459	1	1	3.98558717779715e-77	6	PER7
Cnn2	2.04466362115212e-31	0.781894	0.965	0.846	3.78794382454641e-27	6	PER7
Mfap4	2.52950079864279e-22	0.778222	0.858	0.694	4.68615317956563e-18	6	PER7
Gja1	2.42185401288553e-26	0.757355	0.855	0.63	4.48672674427174e-22	6	PER7
Hacd1	2.42955582813364e-21	0.728825	0.795	0.595	4.50099512720039e-17	6	PER7
Tln2	3.47377210143758e-21	0.718604	0.823	0.604	6.43551019512326e-17	6	PER7
Cmtm7	4.93609887159772e-14	0.706951	0.779	0.654	9.14461676952194e-10	6	PER7
Pgm1	3.13837868495926e-21	0.703742	0.833	0.643	5.81416035175552e-17	6	PER7
Epb41l3	3.00217768930716e-18	0.702734	0.804	0.642	5.56183438721045e-14	6	PER7
Palld	1.48642925292323e-19	0.692679	0.785	0.56	2.75375883396558e-15	6	PER7
Adamts9	2.29404024677668e-26	0.690895	0.924	0.671	4.24993896117848e-22	6	PER7
Ndn	2.14755948414085e-35	0.679833	0.994	0.948	3.97856870031933e-31	6	PER7
Slc1a3	8.9847296564345e-20	0.676463	0.77	0.51	1.66451101615106e-15	6	PER7
Prrx2	2.63864562111461e-28	0.660901	0.946	0.775	4.88835487767692e-24	6	PER7
Pdgfra	3.98538550287544e-14	0.650534	0.858	0.694	7.38332518262704e-10	6	PER7
Glipr2	5.08867766568301e-17	0.650159	0.773	0.565	9.42728424344434e-13	6	PER7
Chd3	1.51015985821074e-20	0.642044	0.905	0.743	2.79772215332122e-16	6	PER7
Akap12	6.71234900998275e-22	0.630074	0.83	0.575	1.2435297775894e-17	6	PER7
Meis2	3.10923856798882e-28	0.629898	0.965	0.862	5.76017537105609e-24	6	PER7
Slc38a4	6.09184372922878e-22	0.61608	0.924	0.726	1.12857496927692e-17	6	PER7
Zfp462	1.36016783738119e-14	0.61093	0.795	0.644	2.51984693553239e-10	6	PER7
Snhg18	6.8285530404352e-15	0.604847	0.77	0.594	1.26505773627102e-10	6	PER7
Tpgs2	1.57212609769846e-15	0.593328	0.785	0.604	2.91252080859616e-11	6	PER7
Wls	2.0240315553099e-16	0.590405	0.877	0.753	3.74972085936712e-12	6	PER7
Eif4ebp1	7.69875963433893e-28	0.581933	0.981	0.918	1.42627220985763e-23	6	PER7
Sox4	8.89512162809337e-31	0.578488	0.991	0.944	1.64791023282058e-26	6	PER7
Lgals1	1.67905241711833e-29	0.575863	1	0.99	3.11061250795342e-25	6	PER7
Zdbf2	2.05757973483937e-13	0.575209	0.763	0.578	3.81187221676343e-09	6	PER7
Rnd2	3.31902292696585e-13	0.574437	0.782	0.632	6.14882187449694e-09	6	PER7
Cgnl1	5.75703268732706e-14	0.571736	0.77	0.567	1.06654787565421e-09	6	PER7
Birc5	2.03567934835024e-25	0.551997	0.984	0.908	3.77129956075366e-21	6	PER7
Mpp6	3.0575371049806e-11	0.549032	0.804	0.711	5.66439324068706e-07	6	PER7
Nectin3	8.36150567489621e-11	0.542931	0.811	0.721	1.54905254133127e-06	6	PER7
Rexo2	3.87538669286288e-11	0.542297	0.817	0.673	7.17954138719777e-07	6	PER7
Fasn	6.73095294669923e-12	0.532428	0.776	0.579	1.2469763429055e-07	6	PER7
Gas1	3.34771604431984e-17	0.531159	0.924	0.78	6.20197874370694e-13	6	PER7
Pja1	1.82922339470256e-14	0.522843	0.842	0.686	3.38881926102596e-10	6	PER7
Cdh11	5.33379594712303e-14	0.518432	0.823	0.63	9.88139037164013e-10	6	PER7
Npm3	5.73082759224405e-11	0.511785	0.795	0.695	1.06169311973913e-06	6	PER7
Jun	1.6810027986711e-14	0.502203	0.959	0.872	3.11422578481809e-10	6	PER7
Bbx	3.22934577367398e-14	0.498036	0.871	0.748	5.98268598030842e-10	6	PER7
Rbpms2	3.09715023841398e-13	0.497925	0.83	0.661	5.73778053168574e-09	6	PER7
Sfxn1	1.07861271868462e-13	0.49609	0.864	0.757	1.99823792263512e-09	6	PER7
Rcn3	8.50970149881067e-28	0.490906	0.994	0.937	1.57650729966967e-23	6	PER7
Ugdh	2.26266046063778e-15	0.488156	0.937	0.787	4.19180476937754e-11	6	PER7
Cdca3	4.35432707132171e-14	0.486654	0.871	0.686	8.0668263323306e-10	6	PER7
Cul4b	1.02132357242534e-09	0.485606	0.763	0.625	1.89210405027518e-05	6	PER7
Igfbp4	7.23675565798189e-30	0.483729	0.997	0.989	1.34068135319773e-25	6	PER7
Krt8	2.9297747196845e-24	0.475673	0.934	0.802	5.4277006456875e-20	6	PER7
Spc24	1.78400474180173e-16	0.475319	0.94	0.806	3.30504718466189e-12	6	PER7
Fbxl7	8.08244157342349e-11	0.473487	0.785	0.635	1.49735312589244e-06	6	PER7
Odc1	3.38388084371584e-19	0.472761	0.991	0.978	6.26897765106796e-15	6	PER7
Tenm3	1.0107445141791e-11	0.469797	0.82	0.667	1.87250528696819e-07	6	PER7
Npc2	2.44765763285975e-25	0.469019	0.987	0.982	4.53453053063597e-21	6	PER7
Acat2	4.15099131869249e-10	0.46542	0.823	0.689	7.6901265170097e-06	6	PER7
Marcks	1.79139133037053e-50	0.464098	1	1	3.31873157864444e-46	6	PER7
Fstl1	2.32416749662695e-21	0.461832	0.987	0.915	4.30575270425109e-17	6	PER7
Enah	1.8971584864265e-12	0.459272	0.877	0.775	3.51467581195374e-08	6	PER7
Ppfibp1	1.57959128572712e-10	0.458834	0.782	0.629	2.92635081593807e-06	6	PER7
