# Supplementary material for: Wt1+/Itga4+ progenitors drive epicardial-derived cell expansion via non-canonical Wnt signalling
Source: Research Square preprint supplement (doi:10.21203/rs.3.rs-4842079/v1), 2024-08-07
Supplement: Supplementary file 16 [file Suppl. dataset 3 DEGs_E12.5.xlsx]

## Sheet: DEGs_E.12.5_res0.3_75%
Supplemental dataset 3. Differential gene expression analysis in EP clusters from the scRNA-seq dataset of Quijada et al., 2021.
gene	p_val	avg_log2FC	pct.1	pct.2	p_val_adj	cluster	cluster name
Adam33	3.00256413402262e-66	0.836164	0.805	0.518	5.3640808254314e-62	0	EP1
Krt18	1.99128632573176e-70	0.802044	0.921	0.76	3.55743302091979e-66	0	EP1
Cystm1	4.76354926720686e-41	0.753959	0.755	0.548	8.51008076586505e-37	0	EP1
Btg2	2.96398725780534e-27	0.727463	0.774	0.699	5.29516323606924e-23	0	EP1
Cebpb	2.49670955587874e-47	0.638771	0.895	0.792	4.46037162157736e-43	0	EP1
Gm12840	1.70070585460422e-17	0.619915	0.819	0.802	3.03831100925044e-13	0	EP1
Krt7	1.68687690884845e-45	0.607503	0.854	0.699	3.01360559765775e-41	0	EP1
Krt19	9.59454844500958e-35	0.603447	0.839	0.693	1.71406607970096e-30	0	EP1
Hspb1	2.41676049268704e-36	0.585119	0.848	0.752	4.3175426201854e-32	0	EP1
Upk3b	2.45949607981862e-82	0.570267	0.999	0.902	4.39388974659597e-78	0	EP1
Tnni1	3.51175628193255e-49	0.563192	0.951	0.897	6.2737525976725e-45	0	EP1
Cryab	4.78074932070515e-64	0.54918	0.988	0.875	8.54080866143975e-60	0	EP1
Mgst1	1.69557600151881e-52	0.548512	0.976	0.89	3.02914652671336e-48	0	EP1
Mxd4	2.65598929591243e-34	0.547397	0.82	0.658	4.74492487714755e-30	0	EP1
Bcam	1.6826290927048e-29	0.545624	0.79	0.614	3.00601687411713e-25	0	EP1
Apela	4.1251997714578e-45	0.54379	0.987	0.895	7.36966939170935e-41	0	EP1
Ypel3	4.01336935157941e-28	0.531288	0.78	0.613	7.16988434659661e-24	0	EP1
Smim14	1.34152494109525e-36	0.531113	0.875	0.76	2.39663430726666e-32	0	EP1
Nid2	2.75628339653246e-25	0.521631	0.769	0.609	4.92410028790525e-21	0	EP1
Aprt	5.01736608027733e-84	0.518371	1	0.991	8.96352450241544e-80	0	EP1
Igfbp5	5.52524655340771e-20	0.517083	0.897	0.837	9.87085296766287e-16	0	EP1
Plxna4	8.68120901620705e-29	0.504805	0.82	0.655	1.55089799074539e-24	0	EP1
Arhgap29	1.08192467104479e-30	0.490575	0.842	0.692	1.93285842482151e-26	0	EP1
Prr13	1.74012480752119e-27	0.487012	0.834	0.73	3.1087329686366e-23	0	EP1
Sdf2	1.6891607378908e-26	0.481819	0.795	0.639	3.01768565824191e-22	0	EP1
Vamp8	1.235674963637e-43	0.470615	0.955	0.908	2.2075333225375e-39	0	EP1
Ly6e	5.11561169604792e-41	0.468611	0.971	0.939	9.1390402949896e-37	0	EP1
Fam213a	3.24085291331884e-24	0.455451	0.837	0.717	5.7897837296441e-20	0	EP1
Hcfc1r1	1.68171175644476e-46	0.452315	0.981	0.939	3.00437805288857e-42	0	EP1
Map1lc3b	4.96379396017161e-43	0.449371	0.964	0.927	8.86781790984659e-39	0	EP1
Zfas1	2.2108123574355e-24	0.449106	0.963	0.943	3.94961627655853e-20	0	EP1
Bex4	6.86466984723905e-44	0.447365	0.978	0.904	1.22637326820926e-39	0	EP1
Dlk1	4.55430661078806e-26	0.433836	0.954	0.923	8.13626876017287e-22	0	EP1
Bex1	2.69458817988834e-24	0.432518	0.867	0.768	4.81388178337052e-20	0	EP1
Smim1	1.1085335159726e-51	0.424146	0.998	0.926	1.98039512628506e-47	0	EP1
Fras1	5.9944767447518e-21	0.421801	0.809	0.664	1.07091327044991e-16	0	EP1
Meg3	1.47193808574151e-48	0.421514	0.998	0.997	2.62961739017721e-44	0	EP1
Hpgd	1.46775093627398e-21	0.418947	0.825	0.703	2.62213704765347e-17	0	EP1
Itm2a	6.26901300661987e-48	0.415849	0.997	0.991	1.11995917363264e-43	0	EP1
Tfpi	4.92114053542748e-20	0.415243	0.823	0.743	8.7916175665412e-16	0	EP1
S100a11	1.93861383575622e-72	0.409451	1	0.999	3.46333361757848e-68	0	EP1
Gpm6a	1.19898497923912e-24	0.404939	0.833	0.653	2.14198666541069e-20	0	EP1
Selenom	7.53599672481129e-23	0.399385	0.938	0.917	1.34630581488754e-18	0	EP1
Rabac1	2.29873071876878e-18	0.399237	0.85	0.787	4.10668242908042e-14	0	EP1
Dcn	3.59327222763622e-36	0.393689	0.999	0.977	6.41938083467211e-32	0	EP1
Cstb	9.0211139535739e-40	0.392707	0.985	0.96	1.61162200780598e-35	0	EP1
Bex2	1.53979695920702e-18	0.390688	0.905	0.876	2.75084726762335e-14	0	EP1
Tgm2	2.47869377769504e-19	0.386408	0.789	0.648	4.42818643385219e-15	0	EP1
Trappc2l	6.3509665031135e-16	0.373932	0.77	0.646	1.13460016578123e-11	0	EP1
Upk1b	4.15284401047021e-24	0.372727	0.886	0.75	7.41905582470502e-20	0	EP1
Map1lc3a	9.49197440370218e-32	0.372582	0.958	0.921	1.69574122722139e-27	0	EP1
Gpx3	2.60944923506142e-17	0.372506	0.937	0.924	4.66178105843722e-13	0	EP1
Plagl1	1.41006543356216e-24	0.371181	0.982	0.936	2.51908189705879e-20	0	EP1
Fos	1.62917961056253e-20	0.365246	0.958	0.923	2.91052937426996e-16	0	EP1
Sulf1	1.62232527781888e-20	0.364072	0.864	0.749	2.89828410882342e-16	0	EP1
Rab34	1.58726292364481e-14	0.361575	0.769	0.657	2.83564521309146e-10	0	EP1
Gabarap	3.39769792555389e-76	0.361432	1	1	6.06998734400203e-72	0	EP1
Mmp23	1.48979481124992e-14	0.360603	0.78	0.689	2.66151843029799e-10	0	EP1
Aplp1	7.02075689586413e-21	0.359	0.854	0.722	1.25425821944613e-16	0	EP1
Tmem108	1.40544290753769e-30	0.35466	0.988	0.931	2.51082375431608e-26	0	EP1
Use1	1.66528048180397e-23	0.35297	0.925	0.895	2.9750235807428e-19	0	EP1
Mat2b	2.42949751508582e-14	0.352642	0.796	0.701	4.34029731070082e-10	0	EP1
Fabp5	1.75753593642957e-18	0.351975	0.978	0.963	3.13983795043143e-14	0	EP1
Pcsk5	2.32761272167138e-14	0.344833	0.752	0.619	4.15828012726592e-10	0	EP1
Rbms2	3.32104057736362e-16	0.343817	0.846	0.781	5.93303899146011e-12	0	EP1
Golm1	2.97662197017789e-18	0.342135	0.862	0.747	5.3177351497228e-14	0	EP1
Colec12	3.07545568762515e-16	0.341801	0.8	0.698	5.49430158594234e-12	0	EP1
Id1	7.25490659817876e-12	0.336852	0.936	0.938	1.29608906376464e-07	0	EP1
Nnat	6.48943963831447e-27	0.333815	0.982	0.949	1.15933839138488e-22	0	EP1
Jun	1.22056317170422e-07	0.331753	0.858	0.841	0.00218054	0	EP1
Uqcc3	1.96905409465623e-18	0.331383	0.86	0.765	3.51771514010336e-14	0	EP1
Kcne1l	1.12875107363742e-08	0.331323	0.816	0.787	0.000201651	0	EP1
Eif4a2	7.22284401893398e-21	0.327297	0.96	0.942	1.29036108398256e-16	0	EP1
Pnrc1	6.03429816012853e-13	0.326007	0.801	0.729	1.07802736630696e-08	0	EP1
S100a6	6.42648380383685e-16	0.323229	0.982	0.928	1.14809133155545e-11	0	EP1
Myl7	5.79369314982515e-27	0.322897	0.998	0.977	1.03504328121626e-22	0	EP1
Lrrn4	3.5076747309808e-24	0.322197	0.966	0.829	6.2664609068972e-20	0	EP1
Prkcdbp	4.02728027788106e-13	0.322189	0.845	0.802	7.1947362164345e-09	0	EP1
Capn6	5.13141763866621e-26	0.321947	0.975	0.947	9.16727761147719e-22	0	EP1
Hsd17b10	2.4398141401823e-15	0.320983	0.864	0.807	4.35872796143568e-11	0	EP1
2410006H16Rik	1.2318567137398e-19	0.318143	0.981	0.966	2.20071201909614e-15	0	EP1
Atp6v0e	1.64349323245617e-25	0.317784	0.976	0.947	2.93610065978295e-21	0	EP1
Sema3d	1.32401638595428e-19	0.316225	0.905	0.825	2.36535527350733e-15	0	EP1
Ier2	9.87532712030609e-11	0.315372	0.877	0.874	1.76422719004268e-06	0	EP1
Plp2	7.54294293881409e-36	0.314525	0.997	0.975	1.34754675601914e-31	0	EP1
Cyba	2.06929119008057e-14	0.313665	0.837	0.773	3.69678871107894e-10	0	EP1
Laptm4a	5.65670700362198e-28	0.311632	0.995	0.988	1.01057070619707e-23	0	EP1
Wt1	3.50239848617659e-24	0.309517	0.974	0.903	6.25703489555447e-20	0	EP1
Stk26	3.33817825065998e-20	0.30883	0.939	0.822	5.96365544480405e-16	0	EP1
Selenow	1.54717920113749e-66	0.307887	1	1	2.76403564283212e-62	0	EP1
Rcn3	5.52550886857391e-19	0.305649	0.981	0.965	9.87132159370728e-15	0	EP1
Bmp4	1.15055594103514e-10	0.304931	0.774	0.69	2.05546818865929e-06	0	EP1
Bnc1	2.51550344651336e-18	0.304467	0.852	0.706	4.49394690719612e-14	0	EP1
Supt4a	8.14271243671673e-17	0.302633	0.894	0.858	1.45469557681944e-12	0	EP1
Ralb	2.48497504711058e-09	0.296473	0.798	0.749	4.43940792166306e-05	0	EP1
Ndn	1.55338437607721e-07	0.29593	0.806	0.82	0.00277512	0	EP1
Clta	9.00741322592466e-28	0.295736	0.99	0.989	1.60917437281144e-23	0	EP1
Fn1	5.56690149346975e-41	0.29453	1	0.997	9.94526951808372e-37	0	EP1
Atp6v1f	8.9542581357488e-21	0.292562	0.941	0.93	1.59967821595152e-16	0	EP1
Tmem176b	8.2950570408157e-12	0.291964	0.875	0.83	1.48191194034172e-07	0	EP1
Nusap1	0	3.45434	0.797	0.125	0	1	EP2
Prc1	4.38302965862227e-307	3.33108	0.792	0.129	7.83028248512869e-303	1	EP2
Aurkb	1.36880261933044e-289	3.17626	0.75	0.111	2.44536587943383e-285	1	EP2
Top2a	0	3.05774	0.982	0.348	0	1	EP2
Spc25	2.19263014989074e-305	3.04585	0.834	0.158	3.9171337627798e-301	1	EP2
Sgol1	0	2.97779	0.853	0.158	0	1	EP2
Hist1h2ap	3.33286661252447e-244	2.94612	0.953	0.564	5.95416620327497e-240	1	EP2
Cenpf	2.25129402551031e-232	2.93885	0.782	0.195	4.02193677657416e-228	1	EP2
Mki67	1.74506500887732e-275	2.67835	0.854	0.2	3.11755863835933e-271	1	EP2
Ube2c	8.18346752763443e-186	2.59005	0.855	0.419	1.46197647381189e-181	1	EP2
Cdca8	2.2521092613085e-246	2.55062	0.809	0.188	4.02339319532763e-242	1	EP2
Tpx2	1.8537131386089e-218	2.48185	0.766	0.182	3.3116585221248e-214	1	EP2
2810417H13Rik	1.74184321931154e-298	2.46746	0.997	0.542	3.11180291130006e-294	1	EP2
Cdk1	1.4471885062709e-221	2.45756	0.846	0.274	2.58540226645296e-217	1	EP2
Ccna2	3.80677216221249e-220	2.40023	0.785	0.191	6.80079846779261e-216	1	EP2
Lockd	3.56994596293283e-179	2.21137	0.812	0.304	6.3777084627795e-175	1	EP2
Cdca3	1.14085245975909e-160	2.0425	0.788	0.297	2.03813291935962e-156	1	EP2
Cks2	1.42101093151107e-212	1.97042	0.978	0.714	2.53863602914454e-208	1	EP2
Hjurp	1.40279852977753e-179	1.91127	0.862	0.373	2.50609957344756e-175	1	EP2
Smc2	2.89806236553358e-192	1.85537	0.915	0.461	5.17738841602574e-188	1	EP2
Cenpw	8.22739600436726e-196	1.82732	0.939	0.506	1.46982429618021e-191	1	EP2
Hmgb2	4.78854036444933e-269	1.82001	1	0.962	8.55472736108873e-265	1	EP2
H2afx	8.88013765391479e-174	1.81727	0.958	0.72	1.58643659187188e-169	1	EP2
Birc5	8.56896550695660e-164	1.79092	0.916	0.56	1.5308456878178e-159	1	EP2
Arl6ip1	2.41455571445346e-99	1.72967	0.904	0.739	4.31360378387111e-95	1	EP2
Trim59	4.35666477088379e-126	1.72142	0.777	0.353	7.78318161318389e-122	1	EP2
Cenpa	1.04054013664979e-91	1.59031	0.815	0.532	1.85892495412485e-87	1	EP2
Cmc2	2.00239711072397e-137	1.56677	0.863	0.502	3.57728243830837e-133	1	EP2
Gmnn	6.99237172335296e-134	1.55472	0.857	0.453	1.24918720837701e-129	1	EP2
Smc4	6.73573619570982e-157	1.48539	0.932	0.545	1.20333927136356e-152	1	EP2
Tubb4b	3.5672617777876e-91	1.41397	0.774	0.415	6.37291316601754e-87	1	EP2
Ccdc34	1.06394737744022e-145	1.31044	0.955	0.683	1.90074198979696e-141	1	EP2
H1f0	7.36149154779258e-105	1.29674	0.954	0.878	1.31513046501314e-100	1	EP2
Cks1b	5.12556356014631e-200	1.29129	1	0.93	9.15681930020139e-196	1	EP2
Bub3	6.53049425839847e-92	1.28961	0.828	0.54	1.16667279926289e-87	1	EP2
Ube2s	1.71370171100527e-150	1.28382	0.985	0.916	3.06152810671092e-146	1	EP2
Rad21	2.8306544427313e-92	1.26877	0.824	0.508	5.05696416193947e-88	1	EP2
H1fx	2.46826531903651e-78	1.19542	0.831	0.56	4.40955599245873e-74	1	EP2
Lsm3	1.40655152529465e-137	1.18823	0.958	0.709	2.51280429993889e-133	1	EP2
Usp1	5.66789606245293e-88	1.1826	0.853	0.527	1.01256963155722e-83	1	EP2
Anp32e	1.02955554998884e-81	1.10284	0.834	0.529	1.83930099005505e-77	1	EP2
Lsm2	1.87392058919071e-150	1.102	0.982	0.851	3.3477591325892e-146	1	EP2
Dek	3.46158647525576e-147	1.10033	0.989	0.903	6.18412423804442e-143	1	EP2
Nucks1	9.92005563417107e-119	1.09705	0.968	0.81	1.77221793904466e-114	1	EP2
Hn1	1.62954044851731e-101	1.09518	0.978	0.929	2.91117401127618e-97	1	EP2
Tmpo	1.04523194062335e-125	1.06195	0.963	0.783	1.86730686192361e-121	1	EP2
H2afz	2.17077831893922e-180	1.03016	1	0.998	3.87809546678492e-176	1	EP2
Ubald2	3.8741379488693e-51	1.0118	0.759	0.554	6.92114744565501e-47	1	EP2
Ezh2	3.06287265275916e-68	1.00082	0.82	0.566	5.47182199415425e-64	1	EP2
Dut	2.76650696144953e-69	0.913382	0.957	0.858	4.94236468662959e-65	1	EP2
Stmn1	5.21367481051869e-130	0.840431	0.999	0.991	9.31423004899164e-126	1	EP2
Rpa3	5.24925679477222e-48	0.834092	0.812	0.615	9.37779726386057e-44	1	EP2
Tuba1b	3.01596608096196e-98	0.817654	1	0.986	5.38802340363855e-94	1	EP2
Nasp	3.6744693422113e-57	0.810443	0.903	0.726	6.56443947986048e-53	1	EP2
Selenoh	5.43903219968051e-124	0.805618	0.999	0.982	9.71683102472923e-120	1	EP2
Myef2	5.62800717481352e-43	0.798009	0.863	0.709	1.00544348178044e-38	1	EP2
Lmnb1	1.02128388218581e-56	0.790737	0.896	0.723	1.82452365552496e-52	1	EP2
Ctcf	1.56833001920637e-37	0.778842	0.766	0.544	2.80182157931218e-33	1	EP2
Dtymk	4.44321069589879e-74	0.758391	0.97	0.882	7.9377959082232e-70	1	EP2
Ssrp1	9.42905857931657e-47	0.728813	0.862	0.694	1.6845013151949e-42	1	EP2
Dynlt1f	1.51807161407318e-43	0.719889	0.846	0.684	2.71203493854174e-39	1	EP2
Kpnb1	1.39876408955934e-38	0.715915	0.786	0.565	2.49889204599775e-34	1	EP2
Tipin	2.340131574814e-38	0.658979	0.892	0.795	4.18064505840521e-34	1	EP2
Tubb5	1.74660476835189e-94	0.656964	1	1	3.12030941866066e-90	1	EP2
Nt5dc2	3.51043533885494e-26	0.65141	0.755	0.595	6.27139273286435e-22	1	EP2
Nudcd2	1.15273710893949e-41	0.647746	0.888	0.771	2.0593648451204e-37	1	EP2
H2afv	9.5810006171274e-80	0.643924	1	0.993	1.71164576024981e-75	1	EP2
Rnaseh2c	1.30078442493164e-40	0.643167	0.877	0.694	2.32385137514038e-36	1	EP2
Hmgb3	2.35243710432226e-42	0.639988	0.915	0.798	4.20262888687172e-38	1	EP2
Calm2	9.4007755156684e-67	0.607557	1	0.993	1.67944854587416e-62	1	EP2
Smc3	2.46824733331244e-25	0.599082	0.783	0.639	4.40952386096267e-21	1	EP2
Mrpl51	3.30331442254833e-53	0.5916	0.957	0.875	5.90137121588259e-49	1	EP2
Smc6	1.09696276440995e-29	0.584083	0.857	0.729	1.95972397861837e-25	1	EP2
Lsm6	1.37924079663083e-58	0.58178	0.984	0.903	2.46401368318098e-54	1	EP2
Dctpp1	9.35168001938845e-39	0.567173	0.95	0.86	1.67067763546375e-34	1	EP2
Lsm5	2.6966842813577e-58	0.56579	0.986	0.901	4.81762646864554e-54	1	EP2
Rbm28	1.63608578134467e-22	0.561998	0.779	0.619	2.92286724837225e-18	1	EP2
1810037I17Rik	5.31733600900369e-58	0.560828	0.997	0.982	9.49942078008509e-54	1	EP2
Sox11	1.44772725447867e-29	0.554927	0.871	0.723	2.58636474012615e-25	1	EP2
Phip	3.76734823473874e-23	0.551416	0.783	0.624	6.73036762136077e-19	1	EP2
Snrpd1	8.46800112235856e-75	0.541208	0.996	0.988	1.51280840050936e-70	1	EP2
Dpy30	2.66548431067066e-30	0.539654	0.912	0.838	4.76188772101313e-26	1	EP2
Cnih4	1.75804477853501e-25	0.537495	0.851	0.744	3.14074699685279e-21	1	EP2
Actn4	1.20903753671291e-37	0.537325	0.916	0.834	2.15994555933761e-33	1	EP2
Uhrf2	6.55097171012553e-24	0.527373	0.801	0.64	1.17033109601393e-19	1	EP2
Wbp11	8.23359588716449e-29	0.524794	0.885	0.755	1.47093190524194e-24	1	EP2
Psip1	4.46671685035218e-29	0.524614	0.89	0.779	7.97978965315416e-25	1	EP2
Anapc11	4.40364297947497e-59	0.524484	0.995	0.972	7.86710818283204e-55	1	EP2
Lsm8	4.20575881216143e-40	0.523105	0.978	0.924	7.5135881179264e-36	1	EP2
Ywhah	1.4788062165139e-33	0.522491	0.958	0.917	2.64188730580208e-29	1	EP2
Zwint	3.8495003619947e-24	0.518805	0.801	0.689	6.87713239670352e-20	1	EP2
Hnrnpul1	1.61206422738087e-19	0.516135	0.774	0.64	2.87995274221592e-15	1	EP2
Fkbp2	2.54057934245507e-21	0.508699	0.789	0.67	4.53874499529599e-17	1	EP2
Ssna1	1.69649819603595e-28	0.507703	0.888	0.772	3.03079402721823e-24	1	EP2
Cbx5	6.52967052788865e-43	0.505829	0.958	0.912	1.16652563980731e-38	1	EP2
G3bp1	6.78742900830659e-37	0.499837	0.942	0.87	1.21257419233397e-32	1	EP2
Man2a1	7.69427087697509e-20	0.498242	0.798	0.678	1.3745814921716e-15	1	EP2
Clic4	2.53609419361589e-22	0.497441	0.825	0.724	4.53073227689479e-18	1	EP2
Gtf2a2	4.32082795285153e-30	0.496889	0.926	0.864	7.71915913776926e-26	1	EP2
Stra13	1.91358617758737e-20	0.492519	0.819	0.706	3.41862170625983e-16	1	EP2
Slc39a1	6.2821387415515e-125	1.81637	0.809	0.427	1.12230408617818e-120	2	EP3
Pam	1.04042417034288e-141	1.68472	0.94	0.633	1.85871778031755e-137	2	EP3
Spry2	2.27761658291466e-115	1.6069	0.85	0.499	4.06896202537704e-111	2	EP3
Actb	1.61396495765753e-209	1.60511	1	1	2.88334839685518e-205	2	EP3
Rpgrip1	2.34222011546159e-87	1.31808	0.782	0.447	4.18437623627213e-83	2	EP3
Pdcd4	1.0253039251913e-79	1.26174	0.862	0.623	1.83170546235426e-75	2	EP3
Kdelr2	2.48697864078134e-116	1.10435	0.997	0.891	4.44298734175586e-112	2	EP3
Pdpn	1.61176209965449e-69	1.06933	0.905	0.652	2.87941299103275e-65	2	EP3
Supt16	7.48958566879422e-60	1.06562	0.754	0.503	1.33801447973009e-55	2	EP3
Nfia	3.67458207378211e-112	1.05532	0.992	0.86	6.56464087481174e-108	2	EP3
Gpc3	2.54206206589227e-113	0.982301	0.998	0.975	4.54139388071653e-109	2	EP3
B4galt1	1.25873908711017e-37	0.917572	0.764	0.604	2.24873737912233e-33	2	EP3
Runx1t1	3.98809958014105e-53	0.85942	0.91	0.715	7.12473989992199e-49	2	EP3
Tacc1	4.48098526931071e-44	0.849013	0.852	0.68	8.00528018362358e-40	2	EP3
Sdc4	1.46419259141665e-47	0.84157	0.889	0.697	2.61578006456585e-43	2	EP3
Col1a1	6.40174168145941e-39	0.831948	0.998	0.971	1.14367115139272e-34	2	EP3
Cbx3	1.44642683767373e-107	0.806326	1	0.975	2.58404154550412e-103	2	EP3
Wtap	9.39686480052838e-37	0.695387	0.862	0.722	1.6787498966144e-32	2	EP3
Gsk3b	9.9578051176309e-36	0.573796	0.953	0.848	1.77896188426476e-31	2	EP3
Arglu1	8.63812101918083e-35	0.569833	0.96	0.834	1.54320032007666e-30	2	EP3
Igsf3	3.38969011910966e-17	0.53808	0.784	0.697	6.0556813977894e-13	2	EP3
Srrm2	1.38546973376723e-50	0.537551	0.993	0.974	2.47514167937516e-46	2	EP3
Igf2r	9.32680801931774e-22	0.527476	0.937	0.828	1.66623425265111e-17	2	EP3
Dpysl2	1.64776353769573e-33	0.504084	0.99	0.915	2.94372956009343e-29	2	EP3
Prrc2c	8.14417262004533e-28	0.503072	0.963	0.915	1.4549564385711e-23	2	EP3
Gnb1	3.54546746197524e-42	0.454078	0.998	0.967	6.33397762081876e-38	2	EP3
Lrrc58	6.83080440156862e-12	0.437479	0.762	0.699	1.22032320634023e-07	2	EP3
Sox11	5.33284255848379e-13	0.426943	0.854	0.734	9.52712323073129e-09	2	EP3
Efna5	2.33789099147852e-14	0.416006	0.907	0.815	4.17664225627638e-10	2	EP3
Myef2	1.83878115364409e-18	0.407565	0.862	0.717	3.28498253098516e-14	2	EP3
Ssr1	5.21131055304645e-16	0.376346	0.983	0.905	9.31000630301747e-12	2	EP3
Ogt	6.61950485936856e-10	0.373232	0.849	0.778	1.18257454312619e-05	2	EP3
Fras1	3.9198799849834e-11	0.348357	0.847	0.691	7.00286559317285e-07	2	EP3
Zfhx3	1.14427088374389e-07	0.348263	0.787	0.72	0.00204424	2	EP3
Wwc2	8.43290012632918e-12	0.342267	0.952	0.838	1.50653760756871e-07	2	EP3
Mxd4	7.7035984921234e-11	0.341213	0.812	0.7	1.37624787061785e-06	2	EP3
Sept2	3.46008933461386e-20	0.319649	0.997	0.981	6.18144959628766e-16	2	EP3
Dag1	4.20218129068384e-10	0.311422	0.932	0.833	7.50719687580667e-06	2	EP3
Plagl1	5.33977265762655e-17	0.308159	0.995	0.944	9.53950385284983e-13	2	EP3
RP24-389J11.1	7.54621234185595e-11	0.304219	0.972	0.92	1.34813083487256e-06	2	EP3
Plxna4	2.17856081595968e-09	0.297641	0.829	0.694	3.89199889771198e-05	2	EP3
Flrt2	4.57780677115349e-09	0.290067	0.977	0.903	8.17825179666572e-05	2	EP3
Rian	8.94357599592497e-10	0.287267	0.965	0.886	1.59776985167199e-05	2	EP3
Syne2	5.32177390135804e-10	0.28587	0.968	0.9	9.50734907477614e-06	2	EP3
Ghr	1.79709438463168e-06	0.281405	0.814	0.744	0.0321051	2	EP3
Lbh	1.09867372846925e-10	0.280383	0.99	0.951	1.96278061591032e-06	2	EP3
Ano6	1.36961642076568e-06	0.275122	0.894	0.795	0.0244682	2	EP3
Soat1	3.24585665388584e-06	0.274219	0.829	0.768	0.0579872	2	EP3
Kcnq1ot1	8.06233288355329e-06	0.273551	0.93	0.866	0.144034	2	EP3
St13	1.24048985708153e-13	0.273245	0.997	0.973	2.21613512967616e-09	2	EP3
Arhgap29	7.57265800708266e-09	0.270086	0.872	0.723	0.000135286	2	EP3
Golgb1	4.49630119768665e-06	0.26963	0.85	0.775	0.0803264	2	EP3
Rhoa	8.46968136118662e-13	0.266662	0.993	0.961	1.51310857517599e-08	2	EP3
Nfib	2.22952042953256e-17	0.263521	0.998	0.991	3.98303824735991e-13	2	EP3
Spats2l	1.39345830748182e-07	0.26146	0.87	0.744	0.00248941	2	EP3
Ap2a2	3.72747419633777e-06	0.261086	0.834	0.79	0.0665913	2	EP3
Hnrnpl	1.19960481544222e-06	0.255576	0.827	0.787	0.0214309	2	EP3
Hnrnpa1	1.5809010390531e-27	0.255053	1	1	2.82427970626835e-23	2	EP3
Meg3	1.04311793742928e-13	0.251605	1	0.996	1.8635301952174e-09	2	EP3
Ube2d2a	2.01591639166537e-10	-0.250191	0.937	0.929	3.60143463371018e-06	2	EP3
Pdia3	4.37477867125286e-07	-0.250518	0.924	0.888	0.00781554	2	EP3
Hint1	4.39353719315436e-22	-0.252367	0.998	1	7.84905419557027e-18	2	EP3
Psmd7	0.000822394	-0.253264	0.809	0.783	1	2	EP3
Banf1	3.31852402963489e-08	-0.254363	0.919	0.902	0.000592854	2	EP3
Polr2f	1.15495190808176e-11	-0.2548	0.982	0.969	2.06332158378806e-07	2	EP3
Sec11a	1.43651723409138e-06	-0.254867	0.88	0.858	0.0256634	2	EP3
Emg1	1.11655620464511e-06	-0.256306	0.857	0.873	0.0199473	2	EP3
S100a10	4.41013633431263e-10	-0.256661	1	0.999	7.87870856124951e-06	2	EP3
Hnrnpk	4.52853063377791e-13	-0.256668	0.992	0.993	8.09021997724423e-09	2	EP3
Rbmxl1	3.54733175920193e-06	-0.256959	0.797	0.831	0.0633731	2	EP3
Polr2j	7.37038845676517e-09	-0.257914	0.884	0.894	0.000131672	2	EP3
Eif3g	3.13207134900722e-06	-0.258383	0.817	0.82	0.0559545	2	EP3
Mrps17	1.34849942217587e-07	-0.258518	0.864	0.858	0.00240909	2	EP3
Uqcrb	2.59457099657221e-14	-0.259632	0.997	0.991	4.63520108537626e-10	2	EP3
Vapa	4.5224068292589e-09	-0.260142	0.924	0.902	8.07927980047103e-05	2	EP3
Gtf2a2	5.13280961556212e-07	-0.261713	0.884	0.876	0.00916976	2	EP3
Ppp1ca	5.55448375426974e-12	-0.261801	0.988	0.978	9.92308522700289e-08	2	EP3
Calm3	4.21551732704327e-05	-0.26471	0.686	0.75	0.753102	2	EP3
Ssna1	2.0408534926909e-05	-0.265569	0.787	0.799	0.364598	2	EP3
Ppib	9.05629215191601e-13	-0.265692	0.993	0.986	1.6179065929398e-08	2	EP3
Psip1	7.61060501208207e-05	-0.266355	0.816	0.801	1	2	EP3
Ugp2	0.00179479	-0.267727	0.865	0.845	1	2	EP3
Eif1	5.9175481636173e-28	-0.267918	1	1	1.05716997943023e-23	2	EP3
Ndufb6	5.88298629455743e-08	-0.267969	0.877	0.866	0.001051	2	EP3
Nasp	0.000660918	-0.26965	0.784	0.76	1	2	EP3
Sarnp	5.65526704175884e-10	-0.27072	0.952	0.915	1.01031345701022e-05	2	EP3
Tmed10	3.72176940127332e-12	-0.270841	0.963	0.936	6.64894103537478e-08	2	EP3
Mtch1	2.71304642081355e-10	-0.27132	0.952	0.94	4.8468574307834e-06	2	EP3
Anapc11	1.00337390894173e-12	-0.271624	0.992	0.974	1.79252748832441e-08	2	EP3
Rnf187	8.90010177042134e-07	-0.273086	0.694	0.77	0.0159	2	EP3
Arhgdia	9.30104749414147e-11	-0.273277	0.945	0.927	1.66163213482837e-06	2	EP3
Ndufab1	5.10574182661396e-11	-0.274246	0.975	0.948	9.12140777324584e-07	2	EP3
Tmed9	6.96037937119634e-09	-0.274344	0.929	0.904	0.000124347	2	EP3
Bax	0.000142137	-0.274374	0.802	0.816	1	2	EP3
Pin1	1.35512670701876e-06	-0.276119	0.824	0.821	0.0242093	2	EP3
Arpp19	5.33180123394936e-13	-0.278541	0.988	0.978	9.52526290445053e-09	2	EP3
Sap18	6.15419537160283e-07	-0.278666	0.874	0.843	0.0109945	2	EP3
Cox5a	3.21164697189392e-14	-0.278777	0.985	0.981	5.73760731528849e-10	2	EP3
Spcs2	5.34070604357801e-07	-0.279047	0.844	0.837	0.00954117	2	EP3
Cetn3	9.75798965668656e-10	-0.279716	0.927	0.892	1.74326485216705e-05	2	EP3
Itgb5	4.61279372976283e-223	3.25668	0.814	0.215	8.24075599822129e-219	3	EP4
Serpine2	2.55068953602356e-181	3.21484	0.763	0.221	4.55680685610609e-177	3	EP4
Pdgfra	1.50602404475126e-237	3.01636	0.903	0.27	2.69051195594813e-233	3	EP4
Lhfp	4.15925748561816e-137	2.23455	0.836	0.381	7.43051349805685e-133	3	EP4
Zeb2	8.78762006551411e-136	2.19551	0.8	0.31	1.5699083247041e-131	3	EP4
Tagln2	2.58354477247981e-177	2.14626	0.992	0.841	4.61550273603517e-173	3	EP4
Sox9	3.85184006504979e-126	2.1052	0.875	0.455	6.88131227621145e-122	3	EP4
Tbx20	3.12255253322989e-130	2.07599	0.85	0.412	5.5784401006152e-126	3	EP4
Ncam1	8.94118895843461e-109	1.88694	0.826	0.418	1.59734340742434e-104	3	EP4
Lsp1	1.13271950976062e-107	1.6199	0.941	0.741	2.02360340418734e-103	3	EP4
Col6a1	2.63156756055451e-83	1.54026	0.757	0.34	4.70129544693064e-79	3	EP4
Ebf1	6.78693943206695e-88	1.43742	0.911	0.683	1.21248672953876e-83	3	EP4
Rbp1	4.02944858085262e-179	1.42612	1	0.99	7.1986098896932e-175	3	EP4
Map1b	3.99389852061466e-43	1.38213	0.791	0.657	7.13509970707809e-39	3	EP4
Raph1	7.72077158396253e-77	1.35343	0.889	0.629	1.37931584347491e-72	3	EP4
Ldha	1.36041059597839e-82	1.35017	0.974	0.942	2.43037352971539e-78	3	EP4
Ccnd1	5.68899946449178e-72	1.2553	0.885	0.673	1.01633975433146e-67	3	EP4
Maged2	1.85547738058414e-50	1.21562	0.822	0.622	3.31481034041357e-46	3	EP4
Sfrp1	1.18429620008126e-47	1.20191	0.848	0.712	2.11574516144517e-43	3	EP4
Fscn1	3.84846424853483e-56	1.10596	0.802	0.572	6.87528138000747e-52	3	EP4
Bgn	6.42888649686347e-58	1.05846	0.907	0.751	1.14852057266466e-53	3	EP4
Arpc1b	4.94819060026715e-55	1.04843	0.913	0.768	8.83994250737726e-51	3	EP4
Ugp2	3.55192887901282e-61	1.03916	0.933	0.834	6.34552094235641e-57	3	EP4
Tcf21	2.40788957150731e-74	1.00439	0.978	0.884	4.30169471949781e-70	3	EP4
Mfap4	3.91020977348537e-32	1.00079	0.83	0.709	6.98558976033162e-28	3	EP4
Lgals1	5.54264010463451e-118	0.973542	1	0.999	9.90192654692956e-114	3	EP4
Nid1	3.02603726577425e-38	0.965418	0.761	0.517	5.40601557530569e-34	3	EP4
Csrp1	3.76225959129766e-77	0.940739	0.978	0.912	6.72127675985327e-73	3	EP4
Tcf4	2.3433683507077e-35	0.907887	0.765	0.534	4.1864275585393e-31	3	EP4
Mfap2	3.2258677014553e-63	0.900644	0.978	0.928	5.76301264864989e-59	3	EP4
Actn1	4.75228995724496e-49	0.881084	0.862	0.693	8.48996600861811e-45	3	EP4
Cnn2	1.22442950104308e-46	0.872043	0.929	0.771	2.18744330361346e-42	3	EP4
Slc25a5	1.89617977949995e-42	0.840635	0.958	0.929	3.38752517607666e-38	3	EP4
Prdx6	2.21806888915783e-33	0.837115	0.893	0.804	3.96258007048046e-29	3	EP4
Limd2	2.26537739315916e-46	0.830125	0.897	0.725	4.04709671287885e-42	3	EP4
5033428I22Rik	1.04142433983011e-26	0.828002	0.755	0.613	1.86050458310649e-22	3	EP4
Tuba1a	1.1034174759948e-37	0.806639	0.972	0.904	1.9712553208647e-33	3	EP4
Sept7	7.69370475420382e-58	0.7954	0.978	0.944	1.37448035433851e-53	3	EP4
Sept11	5.01663628899949e-29	0.792463	0.767	0.585	8.96222073029759e-25	3	EP4
Hmga2	1.23809087314364e-38	0.726396	0.962	0.92	2.2118493448711e-34	3	EP4
Smc4	3.72403309174486e-20	0.707209	0.757	0.607	6.65298511840219e-16	3	EP4
Rdx	3.21710208477795e-47	0.701684	0.972	0.928	5.7473528744558e-43	3	EP4
Gm10169	1.08558841907042e-42	0.695482	0.976	0.944	1.9394037106693e-38	3	EP4
Higd1a	6.57180385589968e-26	0.691619	0.901	0.855	1.17405275885648e-21	3	EP4
2810417H13Rik	1.32707699453272e-17	0.680195	0.753	0.621	2.3708230507327e-13	3	EP4
Golga7	3.87279719692845e-28	0.672973	0.868	0.752	6.91875219231267e-24	3	EP4
Mif	1.79837819992093e-69	0.669119	1	1	3.21280265415873e-65	3	EP4
Prmt1	3.55353050009224e-20	0.660117	0.864	0.778	6.34838223841478e-16	3	EP4
Nfia	9.41639319099299e-32	0.652544	0.964	0.869	1.6822386435709e-27	3	EP4
Ncl	3.10093708663374e-36	0.648165	0.996	0.986	5.53982410527118e-32	3	EP4
Igfbp4	6.33264208052492e-28	0.640836	0.913	0.812	1.13132650768578e-23	3	EP4
Itm2b	3.01589131548923e-30	0.628944	0.964	0.946	5.38788983512151e-26	3	EP4
Fermt2	9.69018663923591e-20	0.608271	0.787	0.636	1.7311518430995e-15	3	EP4
Socs2	1.60245850964671e-16	0.60301	0.771	0.647	2.86279212748385e-12	3	EP4
B2m	8.54501880801947e-43	0.601127	0.994	0.942	1.52656761005268e-38	3	EP4
Smc6	9.6410702038721e-21	0.60072	0.83	0.743	1.72237719192175e-16	3	EP4
Txnl1	1.93656064774429e-19	0.597465	0.824	0.738	3.45966559719518e-15	3	EP4
Hmgb1	2.72224476139248e-45	0.595849	1	0.997	4.86329026622766e-41	3	EP4
Cycs	3.60365089154953e-28	0.594859	0.966	0.943	6.43792231775324e-24	3	EP4
Cct6a	7.57634306733955e-17	0.567032	0.866	0.791	1.35351368898021e-12	3	EP4
Bax	2.13825440948866e-16	0.560148	0.881	0.802	3.81999150255149e-12	3	EP4
Cct8	4.63732687244612e-15	0.56007	0.83	0.763	8.284584457625e-11	3	EP4
Fbl	4.70636470647832e-18	0.557672	0.854	0.776	8.40792054812351e-14	3	EP4
Vdac3	9.71270896307132e-20	0.554943	0.874	0.818	1.73517545625269e-15	3	EP4
Eva1b	1.46120204200761e-23	0.548016	0.935	0.882	2.61043744804659e-19	3	EP4
Il11ra1	9.20185651671717e-16	0.545221	0.761	0.633	1.64391166671152e-11	3	EP4
Uqcc2	4.05586260990135e-32	0.539167	0.968	0.941	7.24579855258876e-28	3	EP4
Tmsb4x	5.63517819529416e-66	0.538384	1	1	1.0067245845893e-61	3	EP4
Hmgb2	2.01983018718546e-20	0.535014	0.996	0.966	3.60842662940682e-16	3	EP4
Glrx5	4.03287176242775e-14	0.532625	0.773	0.69	7.20472540357718e-10	3	EP4
H2afz	8.58594247836673e-31	0.532289	0.998	0.998	1.53387862376022e-26	3	EP4
Fstl1	1.51403554468006e-29	0.524159	0.98	0.964	2.70482450057093e-25	3	EP4
Nudc	1.40866728751513e-17	0.523245	0.848	0.764	2.51658410914577e-13	3	EP4
Tmem258	1.40658309397221e-45	0.517709	0.996	0.979	2.51286069738136e-41	3	EP4
Cks2	3.77923405274132e-10	0.516121	0.836	0.76	6.75160163522238e-06	3	EP4
Fkbp1a	8.73130540390005e-49	0.511226	1	0.999	1.55984771040674e-44	3	EP4
Lsm2	4.14639040035097e-20	0.509155	0.925	0.872	7.407526450227e-16	3	EP4
Ranbp1	6.9779215465967e-28	0.501682	1	0.991	1.2466056842995e-23	3	EP4
C1qbp	1.19012554126526e-12	0.497209	0.842	0.806	2.12615927947039e-08	3	EP4
Chic2	8.80065492671423e-11	0.493802	0.763	0.658	1.5722370026575e-06	3	EP4
Lsm5	4.35285885084143e-24	0.493432	0.947	0.915	7.77638233702822e-20	3	EP4
Eif5a	2.35772091838313e-35	0.470978	1	0.999	4.21206842069146e-31	3	EP4
Aldoa	1.67732257288824e-21	0.4708	0.992	0.98	2.99653677646485e-17	3	EP4
Ppdpf	1.51161382496644e-31	0.470247	0.986	0.963	2.70049809830254e-27	3	EP4
Fbn1	7.92081041218898e-15	0.46994	0.834	0.767	1.41505278013756e-10	3	EP4
Set	5.52231217048883e-26	0.465122	0.998	0.979	9.86561069257829e-22	3	EP4
Cd63	1.43695924469979e-16	0.4628	0.945	0.91	2.56712769065618e-12	3	EP4
Sdhb	5.67187283352462e-16	0.459432	0.881	0.805	1.01328008170917e-11	3	EP4
Cks1b	1.14015726330941e-19	0.459101	0.974	0.94	2.03689095090225e-15	3	EP4
Arf6	1.469110104263e-10	0.454251	0.751	0.649	2.62456520126586e-06	3	EP4
Hspd1	4.45111580919617e-12	0.45318	0.943	0.928	7.95191839312896e-08	3	EP4
Anp32b	2.24767772733325e-29	0.45277	1	0.99	4.01547625988086e-25	3	EP4
Wasf2	6.84643295804997e-13	0.452697	0.802	0.702	1.22311524795563e-08	3	EP4
Serinc3	1.35300017205354e-11	0.450812	0.761	0.679	2.41713480737366e-07	3	EP4
Zwint	1.30639797447455e-10	0.450658	0.789	0.7	2.33387998139878e-06	3	EP4
Tuba1b	2.38737830769592e-20	0.448404	0.998	0.987	4.26505134669876e-16	3	EP4
Dctpp1	4.96615604986257e-15	0.447508	0.901	0.876	8.87203778307948e-11	3	EP4
Pkm	5.37214695025183e-14	0.445634	0.968	0.967	9.5973405266249e-10	3	EP4
Pgls	7.51896259905689e-22	0.444418	0.974	0.922	1.34326266832151e-17	3	EP4
Impdh2	2.36691627501611e-11	0.442136	0.8	0.732	4.22849592531627e-07	3	EP4
Hist1h2bc	1.05911294167762e-88	2.3718	0.868	0.382	1.89210527030707e-84	4	EP5
Ccnb2	6.69249041728142e-99	2.03923	0.876	0.303	1.19561341304733e-94	4	EP5
Cenpa	1.07904249619561e-100	1.89706	0.989	0.56	1.92770941945346e-96	4	EP5
Cdca3	1.67995222165902e-57	1.38591	0.835	0.366	3.00123464399383e-53	4	EP5
Lockd	5.02267764910561e-62	1.30552	0.883	0.375	8.97301362012717e-58	4	EP5
Birc5	6.37056670020985e-63	1.19327	0.981	0.608	1.13810174099249e-58	4	EP5
Cenpw	5.52639711836109e-39	1.0163	0.895	0.575	9.87290845195209e-35	4	EP5
H2afz	1.43057219404672e-76	0.976357	1	0.998	2.55571722466446e-72	4	EP5
Tuba1b	1.69448738445009e-64	0.928705	1	0.988	3.02720171232009e-60	4	EP5
Smc4	3.1779620411304e-16	0.920793	0.786	0.616	5.67742918647945e-12	4	EP5
Odc1	3.09973240080232e-40	0.917772	0.974	0.871	5.53767193403334e-36	4	EP5
Dynll1	5.73543211145724e-85	0.915358	1	1	1.02463494671184e-80	4	EP5
Cks2	8.09255052371095e-32	0.886936	0.932	0.758	1.44573415106096e-27	4	EP5
H2afx	1.1254619250885e-41	0.875358	0.955	0.756	2.0106377291706e-37	4	EP5
Selenoh	2.97796281240507e-69	0.859582	1	0.984	5.32013056436166e-65	4	EP5
Hmgb1	1.17243289235916e-76	0.851624	1	0.997	2.09455136219964e-72	4	EP5
Hmgb3	2.49072129904383e-33	0.833384	0.959	0.812	4.44967360074181e-29	4	EP5
Nucks1	2.42208714087179e-36	0.83233	0.959	0.835	4.32705867716746e-32	4	EP5
Arl6ip1	4.86893483362377e-39	0.82045	0.932	0.761	8.69835208026887e-35	4	EP5
Stmn1	4.69519715594312e-61	0.819739	1	0.992	8.38796971909239e-57	4	EP5
Rnaseh2c	7.78425167414961e-26	0.791796	0.917	0.718	1.39065656158683e-21	4	EP5
Hp1bp3	1.01458323785504e-21	0.785648	0.914	0.785	1.81255295442803e-17	4	EP5
Cacybp	1.05119767417727e-26	0.776642	0.925	0.743	1.87796464491769e-22	4	EP5
Mest	1.33367706086323e-33	0.775714	0.996	0.933	2.38261406923216e-29	4	EP5
Gm21596	3.0522857526382e-18	0.755218	0.771	0.51	5.45290849708814e-14	4	EP5
Hmgn2	1.46099305901031e-81	0.750212	1	1	2.61006409992192e-77	4	EP5
Anp32e	1.48690203000736e-17	0.747888	0.793	0.579	2.65635047660815e-13	4	EP5
H1fx	1.86236047701324e-18	0.743716	0.812	0.602	3.32710699218416e-14	4	EP5
Cks1b	1.1831755503478e-35	0.72564	0.996	0.941	2.11374312069635e-31	4	EP5
H2afv	4.54909938204641e-53	0.716508	1	0.994	8.12696604602592e-49	4	EP5
Lsm5	1.70799533823257e-35	0.696341	0.996	0.913	3.05133367175248e-31	4	EP5
Ptms	2.45145113758413e-45	0.665071	1	0.99	4.37951745729405e-41	4	EP5
Sfpq	1.66941586805732e-24	0.62675	0.966	0.894	2.9824114482844e-20	4	EP5
Ccdc34	2.29927355338777e-15	0.616331	0.891	0.729	4.10765220312726e-11	4	EP5
Calm2	3.20767190270945e-31	0.605528	1	0.994	5.73050585419044e-27	4	EP5
Fkbp2	1.57480126404312e-12	0.602035	0.838	0.684	2.81338245821304e-08	4	EP5
Ran	2.71741664918569e-42	0.60041	1	0.998	4.85466484377023e-38	4	EP5
Med21	8.66148822009227e-12	0.580661	0.786	0.638	1.54737487051948e-07	4	EP5
Gpx7	1.75229429820568e-10	0.56346	0.808	0.656	3.13047376374444e-06	4	EP5
Hmgb2	2.79297805967957e-27	0.553361	0.996	0.968	4.98965530361755e-23	4	EP5
Hnrnpa2b1	1.65307283487644e-38	0.552685	1	0.995	2.95321461950676e-34	4	EP5
Tm2d2	6.70640778409968e-09	0.550879	0.763	0.616	0.00011981	4	EP5
Smim11	5.99927069522126e-11	0.54152	0.805	0.672	1.07176970970128e-06	4	EP5
Pfdn6	3.61589699040692e-15	0.537826	0.917	0.807	6.45979997336196e-11	4	EP5
Hnrnpdl	7.74405559096214e-17	0.53304	0.955	0.88	1.38347553132539e-12	4	EP5
Psmb6	5.00411674439581e-19	0.532656	0.977	0.934	8.93985456386312e-15	4	EP5
Lsm4	9.22319425802573e-29	0.524662	1	0.983	1.6477236541963e-24	4	EP5
Hspa8	2.82484718349486e-29	0.523921	1	0.998	5.04658949331357e-25	4	EP5
Srsf7	4.36888133497468e-19	0.522205	0.932	0.92	7.80500650493226e-15	4	EP5
Eif4g2	3.22316776929732e-27	0.517809	0.992	0.994	5.75818921984967e-23	4	EP5
Dnaja1	7.74848083019932e-17	0.515063	0.947	0.907	1.38426610031511e-12	4	EP5
Srsf3	1.00286049158547e-27	0.512281	1	0.995	1.79161026821745e-23	4	EP5
Eny2	2.15931054492702e-27	0.510451	0.996	0.984	3.85760828851212e-23	4	EP5
Lsm6	1.34497566899512e-18	0.504814	0.97	0.916	2.40279903265978e-14	4	EP5
Hmgn1	6.23048573268935e-59	0.501968	1	1	1.11307627614495e-54	4	EP5
Tardbp	1.11197287269636e-08	0.501644	0.816	0.716	0.000198654	4	EP5
Tuba1a	9.02715012753465e-15	0.49819	0.962	0.91	1.61270037028407e-10	4	EP5
Yaf2	3.8246319230969e-15	0.496484	0.955	0.868	6.83270493061261e-11	4	EP5
Lmnb1	1.19321382948296e-10	0.493991	0.872	0.751	2.1316765063713e-06	4	EP5
P3h4	1.37800474277425e-09	0.489833	0.872	0.781	2.46180547296619e-05	4	EP5
Ppp1cb	2.58994588209427e-12	0.483357	0.936	0.874	4.62693831836141e-08	4	EP5
Ndufv2	1.79502044802052e-11	0.483176	0.876	0.795	3.20680403038866e-07	4	EP5
Serp1	5.06588655153273e-13	0.482172	0.959	0.922	9.05020632431322e-09	4	EP5
Hnrnpm	9.81854835021604e-14	0.481584	0.944	0.835	1.7540836627661e-09	4	EP5
Dnaja2	2.7177006003775e-08	0.480135	0.763	0.623	0.000485517	4	EP5
Wbp1	8.888853063225e-09	0.478802	0.763	0.615	0.000158799	4	EP5
Tmem98	6.68545138966195e-14	0.476933	0.962	0.877	1.19435589076311e-09	4	EP5
Snrpc	7.47735801562878e-13	0.468552	0.936	0.886	1.33583000949208e-08	4	EP5
Hsp90b1	7.08382117681375e-14	0.468102	0.981	0.927	1.26552465323778e-09	4	EP5
S100a6	4.66705997508615e-10	0.467692	0.996	0.945	8.33770264549141e-06	4	EP5
Dbi	9.26675533435129e-20	0.466646	1	0.966	1.65550584048186e-15	4	EP5
Lsm3	9.23777118502687e-10	0.464795	0.853	0.756	1.65032782220505e-05	4	EP5
Ube2l3	1.18271892381371e-13	0.461095	0.955	0.894	2.11292735739319e-09	4	EP5
Ndufs5	1.11656273187396e-15	0.459687	0.977	0.931	1.99473932049282e-11	4	EP5
Sumo1	7.54042462770369e-25	0.45781	1	0.993	1.34709685973926e-20	4	EP5
Ssu72	4.09598307072989e-09	0.455433	0.846	0.759	7.31747375585895e-05	4	EP5
Cwc15	1.80995723676604e-10	0.450514	0.925	0.857	3.23348860348253e-06	4	EP5
Fubp1	4.09808521092697e-12	0.449762	0.947	0.888	7.32122922932104e-08	4	EP5
Rap1b	1.44602765467126e-08	0.447335	0.85	0.76	0.000258333	4	EP5
Morf4l1	9.97047600780552e-29	0.446963	1	0.997	1.78122553879446e-24	4	EP5
Hdgf	2.74835268687719e-16	0.446412	0.981	0.966	4.9099320751061e-12	4	EP5
Srsf2	1.52720353612071e-16	0.445916	0.992	0.981	2.72834911727964e-12	4	EP5
Ndufb8	5.01301810354316e-14	0.445791	0.974	0.929	8.95575684197986e-10	4	EP5
Srp19	2.11340497733286e-11	0.445623	0.925	0.866	3.77559799200515e-07	4	EP5
Dnajb6	4.50870261313679e-08	0.445027	0.774	0.613	0.00080548	4	EP5
Sarnp	4.62512552124327e-14	0.441931	0.936	0.92	8.2627867437011e-10	4	EP5
Hnrnph1	2.35270603765101e-12	0.437358	0.962	0.905	4.20310933626353e-08	4	EP5
Banf1	5.63105662726014e-14	0.436498	0.985	0.898	1.00598826646002e-09	4	EP5
Srsf1	1.05019054624646e-12	0.433919	0.955	0.887	1.87616541086929e-08	4	EP5
Arl1	2.23721688315056e-09	0.433088	0.895	0.784	3.99678796174847e-05	4	EP5
Sf3b5	5.94663007878451e-17	0.431627	0.996	0.971	1.06236546357485e-12	4	EP5
Anp32b	1.08007832735912e-20	0.428823	1	0.991	1.92955993182707e-16	4	EP5
Psmb3	1.84911320748365e-09	0.428304	0.914	0.833	3.30344074516954e-05	4	EP5
Cdkn1c	1.36557278421117e-18	0.428187	0.996	0.996	2.43959577899326e-14	4	EP5
Hsp90aa1	4.28381932684704e-19	0.427446	0.996	0.993	7.65304322741224e-15	4	EP5
Denr	3.08975731747002e-10	0.42714	0.936	0.869	5.51985144766019e-06	4	EP5
Sdhd	8.04833816286134e-07	0.426581	0.872	0.779	0.0143784	4	EP5
Ndufa12	2.20681686445675e-11	0.426374	0.925	0.896	3.94247832835199e-07	4	EP5
Snrpb	1.12829525862562e-19	0.425865	0.996	0.992	2.01569947953468e-15	4	EP5
Mlf2	8.7530250143715e-16	0.423616	0.985	0.943	1.56372791881747e-11	4	EP5
