# Supplementary material for: Wt1+/Itga4+ progenitors drive epicardial-derived cell expansion via non-canonical Wnt signalling
Source: Research Square preprint supplement (doi:10.21203/rs.3.rs-4842079/v1), 2024-08-07
Supplement: Supplementary file 21 [file Suppl. dataset 4 DEGs_integration.xlsx]

## Sheet: Markers_per_cluster
Supplemental dataset 4. Differential gene expression analysis of clusters 1-5 after the integration between PER2 clusters from the scRNA-seq on the posterior part of the cardiac inflow and EP clusters from the scRNA-seq dataset of Quijada et al., 2021.
gene	p_val	avg_log2FC	pct.1	pct.2	p_val_adj	cluster
mt-Co2	8.44277785515659e-172	3.43414	0.75	0.43	1.87775822276538e-167	1
Nme2	5.58502618189668e-162	3.09895	0.819	0.595	1.24216567311564e-157	1
mt-Co3	5.40050844063858e-152	3.07427	0.869	0.678	1.20112708228243e-147	1
Pgk1	1.14284728953133e-154	2.6442	0.769	0.498	2.54180665664662e-150	1
Atp5g2	1.7320033751057e-139	2.49267	0.795	0.576	3.85214870657258e-135	1
Ppp1r12a	4.63263166559524e-146	1.98263	0.769	0.484	1.03034360874504e-141	1
Psmc5	9.85084936169332e-180	1.88426	0.77	0.427	2.19092740653421e-175	1
Gm42418	2.21051975819283e-113	1.86282	0.853	0.749	4.91641699419667e-109	1
Igfbp5	1.57622760206206e-204	1.77968	0.957	0.849	3.50568780974622e-200	1
Pabpn1	1.19384335841433e-121	1.68941	0.798	0.588	2.65522701344932e-117	1
Cct3	1.04615071062876e-169	1.6389	0.886	0.669	2.32674379550942e-165	1
Slc16a3	4.01145898921267e-166	1.62871	0.807	0.496	8.9218859379079e-162	1
Pkm	1.54228820771214e-182	1.6134	0.988	0.966	3.43020320277257e-178	1
Ldha	1.00461720224467e-143	1.60845	0.972	0.948	2.23436911951237e-139	1
Cct7	1.55111915392066e-172	1.59995	0.874	0.612	3.44984411023494e-168	1
Ppp1r14b	1.8899495552971e-158	1.59442	0.971	0.903	4.20343680593627e-154	1
Psmc2	8.09785348850879e-156	1.59147	0.773	0.442	1.80104359437924e-151	1
Nasp	1.04970895964715e-119	1.58929	0.878	0.767	2.33465769715123e-115	1
Krt8	2.42815603110161e-152	1.58625	0.769	0.408	5.4004618287731e-148	1
Hspd1	6.12952389320385e-146	1.54802	0.966	0.931	1.36326740908747e-141	1
Snrpa1	4.4176613622918e-152	1.53525	0.81	0.517	9.82532063587319e-148	1
Ube2m	6.00824008054368e-144	1.5038	0.83	0.579	1.33629267631372e-139	1
Hsp90b1	1.31425080557355e-208	1.50032	0.982	0.922	2.92302521667614e-204	1
Tubb4b	3.93573074722554e-114	1.46942	0.764	0.483	8.75345875490432e-110	1
Eif2s1	4.68139050769725e-141	1.45974	0.804	0.526	1.04118806281695e-136	1
Prmt1	2.80522599345235e-166	1.45915	0.917	0.779	6.23910313203736e-162	1
Tomm6	7.52231154397754e-148	1.44495	0.878	0.685	1.67303731049604e-143	1
Hnrnpd	1.76994235062363e-109	1.41842	0.901	0.825	3.93652878202201e-105	1
Alyref	5.30251111895909e-120	1.39455	0.789	0.547	1.17933149796769e-115	1
Cct6a	1.93611664107846e-138	1.38701	0.911	0.797	4.3061170214226e-134	1
Ebna1bp2	6.52508313197839e-126	1.37916	0.755	0.445	1.45124373938331e-121	1
Pgam1	3.22571255868186e-220	1.36794	0.995	0.966	7.17430730176432e-216	1
Eprs	7.26725463802602e-110	1.36194	0.789	0.566	1.61631010404337e-105	1
Rap2c	3.85738230825069e-109	1.35704	0.784	0.528	8.57920399178036e-105	1
Pdia6	8.34445533512552e-213	1.35586	0.968	0.86	1.85589031108527e-208	1
mt-Atp6	1.15985643384652e-125	1.35261	0.99	0.991	2.57963669451804e-121	1
Psmc4	2.00770195576013e-127	1.34802	0.776	0.472	4.46532991980611e-123	1
Map1b	1.10961342634874e-93	1.34785	0.839	0.676	2.46789122154222e-89	1
Aldoa	8.50277239952241e-183	1.32098	0.996	0.98	1.89110160937778e-178	1
Taldo1	6.29205871478223e-130	1.31702	0.777	0.473	1.39941677875472e-125	1
Hsp90aa1	1.00803241551787e-190	1.31646	0.997	0.994	2.2419648953533e-186	1
Copb2	7.94999227628118e-116	1.30446	0.753	0.476	1.7681577821677e-111	1
Psmb5	2.18828457305966e-173	1.30375	0.933	0.765	4.86696371894198e-169	1
Hspa9	5.71316497449152e-122	1.29762	0.823	0.558	1.27066502197666e-117	1
Gspt1	5.19529228920737e-114	1.26201	0.816	0.598	1.15548495804261e-109	1
Sec61g	4.51479205335738e-179	1.25765	0.995	0.98	1.00413490058721e-174	1
Bex1	2.17318479832023e-142	1.25639	0.924	0.792	4.83338030994403e-138	1
Atp2a2	8.91798223170605e-96	1.25425	0.759	0.494	1.98344842815374e-91	1
Degs1	4.39389616038352e-110	1.25188	0.761	0.481	9.77246445030898e-106	1
Ddx39b	1.21540640089636e-131	1.24149	0.904	0.765	2.7031853762336e-127	1
Tbcb	6.4774228402758e-142	1.23917	0.858	0.581	1.44064361390574e-137	1
Alad	1.36875858890181e-132	1.23871	0.851	0.576	3.04425597757651e-128	1
Fkbp4	2.1329447060687e-135	1.23232	0.898	0.771	4.74388232076739e-131	1
Psmb3	1.41092231265753e-167	1.22782	0.93	0.834	3.13803231558161e-163	1
Hspa5	7.33825370290756e-166	1.20907	0.964	0.895	1.63210100606367e-161	1
Podxl	6.50009126611978e-115	1.2051	0.801	0.495	1.4456852984977e-110	1
Cct8	5.13822407939631e-116	1.18443	0.89	0.772	1.14279241749853e-111	1
Pa2g4	4.23149159310966e-95	1.1805	0.781	0.534	9.4112604522352e-91	1
Afdn	2.15820787342293e-101	1.17847	0.802	0.557	4.80007013127993e-97	1
Cacybp	3.11695949374155e-145	1.17253	0.917	0.735	6.93242961003059e-141	1
Psmd4	5.25146961587086e-137	1.17228	0.894	0.719	1.16797935726584e-132	1
Eif3b	1.2586951376739e-98	1.16253	0.752	0.505	2.79946385570052e-94	1
Psmc6	3.64504527399994e-106	1.16012	0.778	0.515	8.10694519390326e-102	1
mt-Co1	3.3928809227365e-75	1.15982	0.992	0.999	7.54610646025825e-71	1
Eif3d	4.51705663565389e-109	1.15818	0.818	0.563	1.00463856633578e-104	1
Pdia3	2.74626191193393e-178	1.15769	0.964	0.886	6.10796111833226e-174	1
Rsl1d1	3.0549399020602e-103	1.15462	0.826	0.609	6.7944918361721e-99	1
Nop56	1.18504996332378e-88	1.15044	0.774	0.535	2.63566962342842e-84	1
Ncl	6.29073356985762e-96	1.14551	0.988	0.991	1.39912205327203e-91	1
Kmt5a	4.83040820624833e-91	1.14343	0.763	0.522	1.07433108915169e-86	1
Nop58	4.72509151907628e-94	1.14103	0.799	0.598	1.05090760475775e-89	1
Pgp	1.48632514792018e-98	1.12902	0.759	0.484	3.30573576148928e-94	1
Snx6	2.82843376909162e-121	1.12111	0.874	0.652	6.29071954583667e-117	1
Dnaja1	6.00661188744877e-135	1.12098	0.958	0.911	1.33593054988748e-130	1
Lrrc59	6.8880206882347e-122	1.10567	0.863	0.596	1.53196468127028e-117	1
Ybx3	1.01265108917659e-107	1.09704	0.893	0.742	2.25223728743766e-103	1
Dnaja2	1.83181529670588e-109	1.09696	0.839	0.616	4.07414040140355e-105	1
Hnrnpa0	5.94357751143395e-110	1.09686	0.93	0.894	1.32191107431802e-105	1
Eif5a	1.08427770933942e-230	1.09572	1	0.999	2.41154205334181e-226	1
Cyc1	1.31844549572881e-114	1.09297	0.849	0.61	2.93235462705046e-110	1
Akr1b3	1.66841343408776e-96	1.09015	0.75	0.469	3.71071831875458e-92	1
Cct2	1.51852813113115e-110	1.08998	0.933	0.88	3.37735841644878e-106	1
Magoh	1.79929501353729e-106	1.08066	0.849	0.616	4.00181203960828e-102	1
Atp5b	1.5248411251807e-176	1.07951	0.991	0.978	3.39139914651439e-172	1
Mest	9.11048861546376e-142	1.07715	0.971	0.937	2.02626377296529e-137	1
Srm	6.72300769105666e-99	1.07241	0.816	0.577	1.49526414056791e-94	1
Eid1	7.38916118463152e-114	1.06708	0.928	0.867	1.6434233390739e-109	1
Psmc3	2.12823322877232e-107	1.05592	0.822	0.551	4.73340352411252e-103	1
Hras	9.18105873714365e-94	1.05561	0.788	0.528	2.04195927372812e-89	1
Psmd7	1.27183434858496e-121	1.05044	0.903	0.781	2.82868677468782e-117	1
Galk1	2.24099545470391e-112	1.04284	0.85	0.576	4.98419799080697e-108	1
Smarca5	8.32999293143958e-87	1.03836	0.843	0.695	1.85267372788148e-82	1
Eif6	6.07603483486031e-90	1.0362	0.799	0.576	1.35137090762128e-85	1
Ola1	1.97419694418837e-81	1.03048	0.753	0.531	4.39081142356936e-77	1
Prpf40a	4.36441747021357e-100	1.02911	0.838	0.651	9.706900895502e-96	1
Taf10	1.84490067786624e-117	1.02065	0.929	0.827	4.10324359764231e-113	1
Actr3	1.35677117863655e-102	1.01802	0.886	0.721	3.01759477840556e-98	1
Calr	9.29945627124366e-176	1.01213	0.986	0.954	2.0682920692873e-171	1
Fkbp3	3.45672485393518e-166	1.00607	0.979	0.947	7.68810174763724e-162	1
Tuba1a	6.30741455264298e-153	1.00505	0.978	0.903	1.40283207065333e-148	1
Sgol1	0	3.32215	0.786	0.121	0	2
Nusap1	0	3.10998	0.855	0.186	0	2
Hist1h2ap	1.89953183848803e-207	2.7602	0.908	0.572	4.22474876198124e-203	2
Spc25	2.3305394821803e-295	2.61415	0.86	0.234	5.1833528623172e-291	2
Prc1	9.41541412553114e-290	2.61144	0.831	0.199	2.09408225565938e-285	2
2810417H13Rik	1.15565421174912e-272	2.58049	0.906	0.427	2.57029053235121e-268	2
Lockd	2.97695825997805e-234	2.46423	0.838	0.299	6.62105286601718e-230	2
Cenpf	1.0831490207068e-233	2.44689	0.842	0.28	2.409031736954e-229	2
Aurkb	1.09125247884393e-247	2.36554	0.771	0.187	2.42705463819679e-243	2
Top2a	0	2.29309	0.982	0.435	0	2
Ube2c	1.7276139970296e-197	2.23263	0.898	0.485	3.84238629079353e-193	2
Mki67	1.29249759244533e-236	2.04707	0.88	0.291	2.87464389535766e-232	2
Ccna2	6.06673722149958e-192	1.92143	0.824	0.293	1.34930302543372e-187	2
Cks2	4.37551541123379e-231	1.87426	0.981	0.754	9.73158382612507e-227	2
Hjurp	2.79268943885751e-182	1.8335	0.847	0.392	6.21122058096299e-178	2
Cdca3	8.12589214816231e-167	1.80607	0.843	0.384	1.80727967267278e-162	2
Tpx2	4.46541230648529e-185	1.80363	0.818	0.278	9.93152351085394e-181	2
Cdk1	1.98442370932376e-179	1.78023	0.867	0.365	4.41355677190697e-175	2
Mad2l1	1.25547209740032e-149	1.70571	0.751	0.277	2.79229549182805e-145	2
Trim59	3.22665321200481e-145	1.69905	0.8	0.38	7.1763994088199e-141	2
Arl6ip1	6.3149162170925e-115	1.63495	0.928	0.776	1.40450051584354e-110	2
Cdca8	1.59088264040174e-172	1.59926	0.843	0.305	3.53828208051751e-168	2
Birc5	9.05522987498168e-176	1.57043	0.951	0.628	2.01397367649468e-171	2
Racgap1	3.43686236492363e-133	1.56223	0.755	0.304	7.64392558582664e-129	2
Cenpw	1.73425026520746e-179	1.53582	0.938	0.579	3.8571460148479e-175	2
Cenpa	1.12590365697226e-108	1.51856	0.861	0.593	2.504122323472e-104	2
Cmc2	9.95142752809665e-137	1.45915	0.856	0.538	2.21329699652398e-132	2
H2afx	7.26220649535819e-165	1.45743	0.98	0.769	1.61518734663262e-160	2
Smc2	1.29743730581253e-161	1.41572	0.929	0.535	2.88563031185766e-157	2
Hn1	2.08334303964538e-116	1.41477	0.891	0.73	4.63356325447529e-112	2
Hmgb2	7.31828124444218e-221	1.39098	1	0.968	1.62765893157638e-216	2
H1f0	1.19817139292676e-128	1.33812	0.96	0.862	2.66485299500841e-124	2
Smc4	1.82598423768654e-142	1.23308	0.948	0.604	4.06117154303864e-138	2
Spc24	1.94363030933176e-100	1.23161	0.775	0.361	4.32282817098477e-96	2
Ccdc34	2.89771638689111e-142	1.16681	0.957	0.716	6.44481101608452e-138	2
Cks1b	7.29702196327788e-205	1.1634	1	0.941	1.62293065485263e-200	2
Bub3	3.52907656936577e-85	1.14395	0.85	0.596	7.84901919792641e-81	2
Rad21	2.88923829448261e-95	1.12057	0.852	0.558	6.42595489075877e-91	2
Rangap1	2.07576908708026e-81	1.11968	0.765	0.408	4.6167180265752e-77	2
H1fx	1.50297608750153e-72	1.00995	0.852	0.617	3.34276911621215e-68	2
Ubald2	4.84401893717895e-60	0.999412	0.784	0.58	1.07735825181797e-55	2
Ube2s	1.32571933138131e-120	0.994753	0.986	0.933	2.94853236492518e-116	2
Lsm3	7.83276417609607e-111	0.949508	0.962	0.753	1.74208508040553e-106	2
Lsm2	9.410803557296e-133	0.916923	0.984	0.873	2.0930568191782e-128	2
Gmnn	7.46360457674554e-72	0.860574	0.858	0.546	1.65998029391398e-67	2
Stmn1	1.59389187331224e-156	0.858268	1	0.992	3.54497491543375e-152	2
Usp1	3.94320174449492e-58	0.844659	0.842	0.582	8.77007499993115e-54	2
Tmpo	1.56242372817198e-99	0.839582	0.965	0.818	3.47498661382731e-95	2
Myef2	1.64518871443039e-53	0.82062	0.879	0.726	3.65906421976464e-49	2
H2afz	1.30965253737282e-133	0.784968	1	0.998	2.91279820837088e-129	2
Dek	1.16342954001297e-95	0.777629	0.989	0.92	2.58758363994285e-91	2
Dynlt1f	1.23200393487187e-47	0.743279	0.841	0.69	2.74009995154852e-43	2
Nucks1	3.59280019408779e-70	0.710396	0.975	0.846	7.99074691167066e-66	2
H2afv	2.6284344779768e-108	0.701067	1	0.994	5.8459011224682e-104	2
Tuba1b	2.35060220271247e-87	0.695758	1	0.988	5.22797435905281e-83	2
S100a6	8.90872626969041e-28	0.671246	0.903	0.804	1.98138980964184e-23	2
Tubb4b	1.42045945314272e-43	0.654116	0.812	0.529	3.15924386973472e-39	2
Crip1	5.42111480658018e-20	0.647495	0.879	0.81	1.2057101441315e-15	2
Calm2	3.46379456644698e-83	0.645036	1	0.994	7.70382549523474e-79	2
Anp32e	3.1146344531514e-43	0.607869	0.857	0.615	6.92725848725404e-39	2
Selenoh	3.19500418747417e-89	0.604022	1	0.986	7.10600881336129e-85	2
Sox11	2.21554701521625e-33	0.596019	0.851	0.701	4.92759811654247e-29	2
2310036O22Rik	2.69306088812546e-45	0.591857	0.893	0.767	5.98963672127984e-41	2
Ezh2	2.99743785912895e-37	0.579756	0.833	0.644	6.6666015424887e-33	2
Hmgn2	1.45171838629737e-93	0.565505	1	0.999	3.22876686296398e-89	2
Ctcf	3.4658642565802e-27	0.560745	0.798	0.606	7.70842869306001e-23	2
Anapc11	7.11155604491642e-68	0.560251	0.992	0.961	1.58168117994986e-63	2
Prkcdbp	3.09007216947284e-20	0.559232	0.774	0.637	6.87262951212454e-16	2
Dut	7.00001326382309e-33	0.545006	0.946	0.885	1.55687295000689e-28	2
Uhrf2	1.74710186148974e-25	0.53539	0.798	0.646	3.88572925013934e-21	2
Man2a1	4.44094538489705e-22	0.526209	0.767	0.633	9.87710663054952e-18	2
Mrpl51	2.23055551853048e-48	0.526007	0.956	0.887	4.96097852876365e-44	2
Lsm6	8.21501843638239e-50	0.501655	0.981	0.917	1.82710225043581e-45	2
Upk1b	1.97645306040515e-22	0.501072	0.823	0.694	4.3958292516471e-18	2
Tubb5	3.24742103051848e-64	0.498346	1	1	7.22258911397615e-60	2
Tipin	2.67552875032452e-21	0.498312	0.861	0.801	5.95064349359675e-17	2
Bmp4	8.0046933975544e-16	0.498073	0.75	0.658	1.78032385855007e-11	2
Rpa3	1.8177915845692e-23	0.492626	0.81	0.675	4.04295026324037e-19	2
Hnrnpul1	3.93114402603829e-18	0.477396	0.771	0.654	8.74325742831177e-14	2
Usp50	3.64319127934032e-18	0.476555	0.765	0.642	8.1028217243808e-14	2
Wbp11	6.75695661363642e-28	0.469897	0.898	0.779	1.50281472043888e-23	2
Phip	1.15678673428027e-20	0.467011	0.803	0.656	2.57280937571275e-16	2
Rbm28	2.72372119718477e-16	0.462405	0.767	0.643	6.05782831465864e-12	2
Actn4	1.49292012311826e-29	0.460807	0.903	0.839	3.32040364582732e-25	2
Dtymk	2.58676962252111e-35	0.453551	0.97	0.905	5.7532343174492e-31	2
Clic4	3.2902536458737e-20	0.449246	0.832	0.738	7.3178531337877e-16	2
Rnaseh2c	2.93401484685616e-24	0.441733	0.881	0.747	6.52554242089278e-20	2
Nhp2l1	2.48680143694412e-28	0.436215	0.899	0.779	5.53089507590743e-24	2
Cbx3	1.76106043293249e-23	0.435384	0.99	0.981	3.91677450888515e-19	2
Hp1bp3	5.5416923515028e-17	0.433888	0.841	0.775	1.23252779589774e-12	2
Nudcd2	4.93672381224687e-27	0.432934	0.904	0.809	1.09797674308183e-22	2
Spon1	3.74227760122998e-15	0.429818	0.78	0.681	8.32319961289559e-11	2
Smc6	6.69237974400119e-20	0.42754	0.855	0.758	1.48845217886331e-15	2
Lsm5	3.90283382376415e-39	0.418177	0.986	0.919	8.68029270743385e-35	2
Lsm8	1.35736503833016e-27	0.417788	0.965	0.929	3.01891558175012e-23	2
Lmnb1	1.66714617283485e-27	0.414616	0.91	0.775	3.707899803002e-23	2
Fkbp2	2.00199621429221e-16	0.410878	0.805	0.702	4.45263978020731e-12	2
Gtf2a2	1.9671922984262e-22	0.405148	0.924	0.876	4.3752323909297e-18	2
Gemin7	1.73704261656363e-20	0.396235	0.909	0.846	3.86335648349916e-16	2
Dynll1	1.152154262718e-43	0.396198	1	1	2.56250629571111e-39	2
Maf	2.43813613958205e-75	1.27007	0.764	0.466	5.42265858804445e-71	3
Zfas1	5.21087557305798e-116	1.01922	0.986	0.908	1.15895083620383e-111	3
Fam213a	1.26832875636892e-69	0.90332	0.853	0.566	2.82088998704011e-65	3
Adam33	8.65600243380379e-60	0.890478	0.786	0.465	1.9251815013023e-55	3
Cebpb	6.62538848129636e-64	0.888505	0.892	0.68	1.47355265212512e-59	3
Gm12840	5.93370357858428e-38	0.854393	0.819	0.62	1.31971501291293e-33	3
Ypel3	8.54901058659195e-50	0.829762	0.814	0.591	1.90138544456392e-45	3
2410006H16Rik	1.45512308802402e-107	0.821757	0.996	0.948	3.23633926007422e-103	3
Btg2	1.51629142032918e-31	0.794551	0.756	0.611	3.37238374795413e-27	3
Rpl18-ps1	7.57216735457907e-43	0.753129	0.764	0.504	1.68412574133193e-38	3
Mir703	1.49418264597797e-59	0.752095	0.895	0.66	3.32321162291961e-55	3
Snhg6	1.61719751055346e-70	0.726988	0.964	0.87	3.59680898322195e-66	3
Gm5805	1.06435806306915e-64	0.722597	0.944	0.713	2.36723876807209e-60	3
Spon1	5.48708997290589e-41	0.717695	0.847	0.666	1.220383680874e-36	3
mt-Rnr1	2.13371279603705e-53	0.713222	0.931	0.712	4.74559062966599e-49	3
Gm9385	1.64396040178973e-42	0.69439	0.812	0.554	3.65633232962053e-38	3
Mgst1	3.91073754517018e-62	0.689084	0.977	0.779	8.697871374213e-58	3
Pyurf	1.77826049500642e-34	0.685036	0.765	0.512	3.95502916694379e-30	3
Nrep	4.11471435229447e-65	0.673707	0.961	0.829	9.15153619093812e-61	3
Plagl1	2.0849617394912e-59	0.664811	0.991	0.916	4.63716340480238e-55	3
Kcne1l	3.49535660537789e-31	0.664506	0.822	0.641	7.77402262602096e-27	3
Gm6863	5.9123803281965e-82	0.658846	0.994	0.767	1.31497250879418e-77	3
Gm12013	3.89004554741087e-50	0.65593	0.912	0.676	8.65185030199652e-46	3
Gltscr2	2.1691287969417e-41	0.648029	0.853	0.638	4.82435935727803e-37	3
Rps27rt	3.54091114780452e-104	0.647004	0.997	0.927	7.87534048383204e-100	3
Rpl28-ps1	4.74127062031554e-39	0.640596	0.86	0.635	1.05450599866438e-34	3
Gm15427	1.22305076310428e-116	0.640161	0.995	0.769	2.72018720222023e-112	3
Fos	3.71502963034424e-44	0.629688	0.958	0.827	8.26259740084863e-40	3
Rpl3-ps1	8.41775459422539e-75	0.618558	0.994	0.768	1.87219279930167e-70	3
Gm9794	1.6659273548725e-96	0.617158	0.995	0.769	3.70518902997192e-92	3
Gm12254	7.39917452986203e-60	0.617045	0.984	0.759	1.64565040718661e-55	3
Rpl39-ps	5.53659821535704e-84	0.615962	0.995	0.769	1.23139480907756e-79	3
Rpl10a-ps1	1.16687524245912e-81	0.615335	0.995	0.769	2.59524722675332e-77	3
Capn6	4.1442005576062e-59	0.614158	0.984	0.845	9.21711646017194e-55	3
Meg3	6.76136814532711e-71	0.613256	0.999	0.985	1.5037958892022e-66	3
Rps10-ps1	1.39076631252745e-62	0.612131	0.987	0.758	3.09320335569229e-58	3
Gm8430	9.45686805334058e-88	0.611459	0.995	0.769	2.10330202374348e-83	3
Gas1	9.49289708331976e-55	0.611089	0.988	0.906	2.11131524030115e-50	3
Gas5	3.04211418485104e-153	0.607948	1	1	6.76596615852719e-149	3
Gm15500	1.11396827671969e-73	0.607581	0.995	0.768	2.47757684425226e-69	3
Rpl10-ps3	2.84089641610237e-60	0.606955	0.969	0.832	6.31843771905327e-56	3
Gm5905	8.90480647178116e-53	0.606151	0.969	0.736	1.98051800738885e-48	3
Gm9843	8.48992620435088e-87	0.605968	0.995	0.769	1.88824448710968e-82	3
Rps10-ps2	1.05960098535376e-83	0.59576	0.995	0.769	2.3566585515253e-79	3
Gm9294	1.05541406724171e-60	0.593755	0.987	0.762	2.34734642695228e-56	3
RP24-389J11.1	6.65507025814833e-47	0.591366	0.932	0.711	1.48015417611477e-42	3
Gm13611	3.48086214882103e-58	0.585141	0.991	0.762	7.74178550519285e-54	3
Gm10443	1.96569388455341e-30	0.583455	0.83	0.626	4.37189976863524e-26	3
Cox7a2l	8.29820857582768e-110	0.582514	1	0.996	1.84560456934984e-105	3
Rps15-ps2	5.00903349486462e-39	0.580281	0.886	0.678	1.11405913959284e-34	3
Gm15772	1.24861123415504e-47	0.58027	0.948	0.722	2.77703624588423e-43	3
Sdf2	7.02140008921698e-28	0.579712	0.809	0.652	1.56162959384275e-23	3
Gm6274	7.18844937654928e-43	0.576851	0.929	0.714	1.59878302583833e-38	3
Gm6472	9.59653539889002e-87	0.574149	0.995	0.769	2.13436543806713e-82	3
Rpl6l	1.01468336394156e-68	0.569996	0.995	0.769	2.25675726974243e-64	3
Gm4149	3.40154076118966e-41	0.569677	0.925	0.708	7.56536680696192e-37	3
Rpl37rt	6.98656953797602e-66	0.563636	0.995	0.769	1.55388293094125e-61	3
Snhg1	5.50351557332612e-40	0.562516	0.977	0.943	1.22403689866346e-35	3
Rps26-ps1	3.20320886797823e-57	0.562346	0.994	0.766	7.12425684327039e-53	3
Tgm2	2.39181793593155e-29	0.562158	0.768	0.549	5.31964227130536e-25	3
Rpl36a-ps2	3.53007480006193e-50	0.561446	0.977	0.761	7.85123936281773e-46	3
Gm7536	1.68177899564538e-31	0.561384	0.839	0.64	3.7404446642149e-27	3
Use1	5.3481507759765e-44	0.558119	0.935	0.87	1.18948221408493e-39	3
Gm43712	2.129778349693e-45	0.557339	0.969	0.745	4.73684002755221e-41	3
Rps27	7.66061492331645e-170	0.556953	1	1	1.70379736509481e-165	3
Eif4a2	5.8098651225975e-47	0.556934	0.965	0.923	1.29217210191691e-42	3
Gm14586	2.08281235117884e-71	0.550104	0.995	0.769	4.63238295025686e-67	3
Gm10288	2.54814285525682e-51	0.548488	0.986	0.761	5.66732452437668e-47	3
Rpl21-ps8	9.10625358149269e-42	0.547734	0.964	0.734	2.02532185905979e-37	3
2210013O21Rik	3.91507710633697e-23	0.542554	0.766	0.577	8.70752299220406e-19	3
Rpsa-ps10	2.03755742878256e-38	0.542111	0.93	0.718	4.53173147735529e-34	3
Gm11478	7.97806738847469e-63	0.540687	0.995	0.769	1.77440196787066e-58	3
Rpl10	6.75595110847719e-162	0.539548	1	1	1.50259108603641e-157	3
Rps19-ps6	1.97661854577448e-25	0.533956	0.784	0.594	4.39619730765702e-21	3
Rps13-ps2	3.81674928482731e-29	0.533862	0.838	0.624	8.48883208438442e-25	3
Rps16-ps2	3.90976296932847e-50	0.533442	0.992	0.768	8.69570382008345e-46	3
Ogt	2.88218735673773e-32	0.53268	0.882	0.745	6.41027290012038e-28	3
Rps23-ps1	1.23381251068897e-65	0.531872	0.995	0.769	2.74412240502334e-61	3
Gm4332	2.43784696829665e-56	0.530784	0.995	0.769	5.42201544218857e-52	3
Tpt1-ps3	1.1186073285613e-64	0.530713	0.995	0.769	2.4878945594532e-60	3
Ier2	3.17012776174296e-22	0.527562	0.882	0.819	7.05068115489253e-18	3
Rps18	8.56823482678154e-165	0.526628	1	1	1.90566110782448e-160	3
Gm2225	1.48311149569284e-35	0.522196	0.926	0.713	3.29858827757045e-31	3
1190002N15Rik	1.91624165824527e-39	0.521843	0.958	0.709	4.26191307210331e-35	3
Wdr89	1.89346348618398e-74	0.521417	1	0.91	4.21125213962179e-70	3
Plxna4	3.7512013277561e-22	0.518519	0.805	0.699	8.34304687306234e-18	3
Rpl19-ps11	2.56719066345452e-46	0.518157	0.988	0.765	5.70968875458919e-42	3
Nrk	1.26452323970816e-45	0.512984	0.986	0.885	2.81242613743491e-41	3
2410015M20Rik	1.35049117514096e-39	0.510693	0.971	0.753	3.003627422631e-35	3
Gm10275	7.62090040718642e-38	0.509332	0.961	0.749	1.69496445956233e-33	3
Uqcc3	2.38346513550115e-29	0.509254	0.877	0.759	5.30106480786811e-25	3
Rps11-ps2	4.75940282538195e-48	0.50794	0.994	0.769	1.0585387823932e-43	3
Rps24-ps3	1.35966746892396e-37	0.506392	0.958	0.739	3.02403641763379e-33	3
Gm8624	3.43801194037087e-37	0.505606	0.961	0.745	7.64648235657885e-33	3
Rpl18-ps2	2.12188167053342e-23	0.50243	0.76	0.569	4.71927702343338e-19	3
Col1a2	3.08315638236377e-48	0.500987	0.996	0.938	6.85724811001526e-44	3
Rps25-ps1	1.63842130204532e-31	0.50024	0.89	0.678	3.644012817879e-27	3
Rpl34-ps1	2.01549251360379e-30	0.497106	0.909	0.703	4.48265689950618e-26	3
Malat1	4.22481105634504e-61	0.495414	1	1	9.39640227041701e-57	3
Snhg8	1.30942895795492e-44	0.493429	0.971	0.897	2.91230094538753e-40	3
Slc39a1	2.00298691295521e-172	2.12396	0.821	0.388	4.45484319310368e-168	4
Spry2	3.21070097679987e-148	1.86231	0.839	0.444	7.14092004250059e-144	4
Pam	3.22046568778154e-146	1.69014	0.921	0.642	7.16263773619492e-142	4
Rpgrip1	2.95315458549827e-133	1.68374	0.781	0.364	6.56811111360671e-129	4
Actb	1.12155772168887e-261	1.64746	1	1	2.49445652880821e-257	4
Pdpn	6.48676850052256e-108	1.3741	0.896	0.585	1.44272218220122e-103	4
Pdcd4	1.03667776483689e-81	1.23329	0.858	0.639	2.30567501677372e-77	4
Nfia	7.16224602595393e-129	1.14141	0.986	0.835	1.59295513863241e-124	4
B4galt1	5.84020323973107e-57	1.12059	0.76	0.556	1.29891960254859e-52	4
Kdelr2	2.98718724668267e-125	1.08233	0.997	0.91	6.64380315534693e-121	4
Col1a1	1.60138837187123e-69	1.0482	0.997	0.903	3.56164787787881e-65	4
Tacc1	3.18383937207526e-62	1.04258	0.847	0.656	7.08117714743258e-58	4
Cbx3	1.36597799358603e-150	0.952833	1	0.979	3.0380716555347e-146	4
Wtap	1.14039344969224e-50	0.805931	0.864	0.722	2.53634907146052e-46	4
Dpysl2	1.05047475644299e-71	0.763692	0.989	0.864	2.33636090580486e-67	4
Sdc4	1.03346028715859e-41	0.741346	0.89	0.731	2.29851902466942e-37	4
Sept2	1.95088680818988e-56	0.636412	0.988	0.815	4.3389673500951e-52	4
Gpc3	3.90679785139822e-59	0.628649	0.995	0.982	8.68910910129478e-55	4
RP24-389J11.1	4.07219818242289e-39	0.61835	0.96	0.714	9.05697597752675e-35	4
Runx1t1	4.48953986064389e-30	0.588059	0.904	0.759	9.98518560405808e-26	4
Efna5	3.52915143208484e-26	0.569629	0.896	0.77	7.8491857000999e-22	4
Gsk3b	3.46330922914731e-37	0.565749	0.946	0.865	7.70274605654653e-33	4
Fam213a	2.51296599411326e-27	0.539297	0.844	0.578	5.58908766750731e-23	4
Cryab	3.29614659170577e-39	0.530647	0.989	0.804	7.33095963461281e-35	4
Plagl1	3.6054440475473e-40	0.528457	0.995	0.918	8.01886810614996e-36	4
Ssr1	3.25906400085349e-32	0.524437	0.986	0.903	7.24848424429825e-28	4
Myef2	2.2329775527826e-27	0.520126	0.87	0.734	4.96636537514377e-23	4
Igsf3	3.41612827108309e-16	0.518702	0.777	0.703	7.5978108877159e-12	4
Ano6	4.59016262969018e-22	0.513705	0.884	0.713	1.02089807046939e-17	4
Tmem263	2.31470809534924e-16	0.502379	0.75	0.674	5.14814227486625e-12	4
Sulf1	7.96203790140623e-25	0.501419	0.883	0.658	1.77083684965176e-20	4
Rps3a2	1.60326325239953e-25	0.499769	0.937	0.685	3.5658177996618e-21	4
Ghr	2.69458055175712e-19	0.498913	0.801	0.642	5.99301660516302e-15	4
Gltscr2	5.90934430078506e-23	0.495912	0.878	0.641	1.3142972659376e-18	4
Rian	3.58445527850282e-26	0.486582	0.964	0.831	7.97218698491812e-22	4
Rps26-ps1	9.86144102466507e-34	0.485584	0.991	0.775	2.19328309829576e-29	4
Spats2l	2.05850512281713e-22	0.485237	0.867	0.677	4.57832124365757e-18	4
Aldh1a2	1.01818454028773e-27	0.481997	0.901	0.661	2.26454423605393e-23	4
mt-Rnr1	1.82035230629925e-27	0.481832	0.958	0.714	4.04864556444017e-23	4
Smpd3	3.80371629099731e-28	0.479522	0.776	0.485	8.45984540280711e-24	4
Gnb1	1.90958754779137e-49	0.475437	0.998	0.972	4.24711366504278e-45	4
Rps19-ps6	8.87317242365848e-17	0.472772	0.782	0.601	1.97348227874588e-12	4
Rps25-ps1	6.1853039289541e-22	0.469048	0.913	0.681	1.37567344683868e-17	4
Tgm2	3.0186910640438e-18	0.468789	0.76	0.558	6.71387079553982e-14	4
Gpm6a	4.80158566354194e-23	0.46832	0.813	0.571	1.06792066742836e-18	4
Rpl14-ps1	1.24479793214077e-21	0.467959	0.9	0.67	2.76855508087429e-17	4
Gucy1a3	2.42005356031472e-25	0.465688	0.966	0.727	5.38244112349597e-21	4
Sox11	1.27457080617247e-17	0.461176	0.858	0.706	2.83477293000819e-13	4
Cyr61	1.22022351185866e-28	0.460418	0.941	0.665	2.71389911272486e-24	4
Mir703	2.03123065181758e-20	0.455025	0.907	0.666	4.51766009270748e-16	4
Mxd4	1.07555477796263e-17	0.454571	0.805	0.669	2.39214138166668e-13	4
Lrrc58	7.70871371727262e-13	0.44948	0.756	0.706	1.7144950178586e-08	4
Nrep	4.59244313020506e-24	0.440324	0.974	0.831	1.02140527658891e-19	4
mt-Rnr2	3.05588453605147e-26	0.440186	0.992	0.776	6.79659279663206e-22	4
Meg3	2.10981474743342e-31	0.438723	0.998	0.986	4.69243897976667e-27	4
Rpl37rt	6.22314893464553e-28	0.437741	0.992	0.777	1.38409055455451e-23	4
Nfib	7.22784078268768e-41	0.436654	0.998	0.966	1.60754406847757e-36	4
Fras1	6.90599260995992e-16	0.433005	0.844	0.693	1.53596181638119e-11	4
Dag1	2.0538482438302e-19	0.432808	0.927	0.808	4.56796387910274e-15	4
Gm6472	1.5850198733523e-29	0.431589	0.992	0.777	3.52524270032286e-25	4
Supt16	2.36626402829664e-21	0.430657	0.753	0.597	5.26280782533456e-17	4
Col1a2	3.91989040735161e-35	0.429636	0.998	0.94	8.71822825499071e-31	4
Gm4366	1.6337209528019e-19	0.429546	0.924	0.702	3.63355877112671e-15	4
2700060E02Rik	1.54039757602007e-24	0.428487	0.991	0.769	3.42599824882623e-20	4
Timp3	1.16254183360269e-19	0.425041	0.813	0.592	2.58560929211574e-15	4
Rpsa-ps10	4.26212017713185e-20	0.424217	0.954	0.721	9.47938148595895e-16	4
Gm4149	1.57242623221621e-19	0.423791	0.947	0.712	3.49723318307206e-15	4
Igf2r	2.83049382412267e-15	0.420819	0.94	0.849	6.29530131423123e-11	4
Ogt	3.22105519405081e-12	0.419702	0.832	0.759	7.16394885708841e-08	4
Gm14303	1.18245289695284e-23	0.419594	0.969	0.756	2.6298934881128e-19	4
Gm8730	1.32117722895819e-26	0.418477	0.992	0.777	2.93843027492592e-22	4
Rps27rt	2.21154018309258e-34	0.418232	0.998	0.929	4.9186865212162e-30	4
Fam96a	3.70770303878542e-19	0.41583	0.932	0.7	8.24630232856266e-15	4
Gm6863	6.63649024550659e-25	0.41549	0.992	0.776	1.47602179550312e-20	4
1190002N15Rik	1.39206543178732e-24	0.414925	0.974	0.715	3.09609272683818e-20	4
Arhgap29	7.21078884646625e-18	0.41472	0.873	0.701	1.60375154734256e-13	4
Nrk	3.51274618882389e-27	0.412542	0.994	0.887	7.81269879856321e-23	4
Gm10443	3.84895581186655e-16	0.4111	0.833	0.633	8.56046262117239e-12	4
Gm12254	6.55829755427224e-24	0.410726	0.988	0.767	1.45863095904569e-19	4
Rpl28-ps1	6.3404533710931e-19	0.405454	0.867	0.641	1.41018023426482e-14	4
Gm15427	6.56685892768262e-26	0.404755	0.992	0.777	1.46053509410589e-21	4
Golm1	7.84803744614154e-17	0.402686	0.904	0.743	1.74548200839634e-12	4
Rps6-ps4	1.08522330903364e-25	0.400062	0.992	0.777	2.41364516162171e-21	4
Gm2225	5.77895499326951e-18	0.397849	0.952	0.716	1.28529738005307e-13	4
2210013O21Rik	8.77768515838965e-14	0.396253	0.751	0.586	1.95224495607744e-09	4
Gm7536	2.32468759764632e-16	0.395195	0.858	0.643	5.17033768592518e-12	4
Gm9844	1.35679177459865e-22	0.394287	0.968	0.818	3.01764058588485e-18	4
Lbh	9.62062501422321e-22	0.39409	0.988	0.925	2.13972320941338e-17	4
Rpl39-ps	1.26449824151307e-21	0.39282	0.992	0.777	2.81237053894922e-17	4
Gm5905	1.38407750113721e-19	0.392813	0.968	0.745	3.07832677027928e-15	4
Ap2a2	9.157943678336e-12	0.391383	0.822	0.765	2.03681825349871e-07	4
Gm9294	3.0358569938306e-21	0.391284	0.986	0.77	6.75204953997864e-17	4
Gm9794	2.26919857770681e-23	0.389479	0.992	0.777	5.04692455667771e-19	4
Gm12013	1.7021643611405e-16	0.389391	0.898	0.686	3.78578375561259e-12	4
Myeov2	1.9442767026796e-22	0.388867	0.992	0.775	4.32426581442969e-18	4
Snhg18	5.11847563085591e-19	0.387751	0.972	0.853	1.13840016505866e-14	4
Gm43712	7.99380062559606e-20	0.385659	0.971	0.752	1.77790119713882e-15	4
Ptp4a1	1.17080092486109e-17	0.383836	0.92	0.689	2.60397833698355e-13	4
Bicc1	6.53974527821119e-21	0.383635	0.977	0.887	1.45450474732695e-16	4
Btg2	1.58778059652562e-23	0.38347	0.864	0.596	3.53138282473263e-19	4
Serpine2	6.72099914209189e-199	3.35191	0.772	0.214	1.49481741919266e-194	5
Itgb5	1.43272367586757e-228	3.23478	0.816	0.218	3.18652072749706e-224	5
Pdgfra	9.31760986080717e-175	2.36361	0.897	0.366	2.07232960914212e-170	5
Lhfp	9.54150152320585e-140	2.27436	0.837	0.379	2.12212535377621e-135	5
Tbx20	4.04976939531442e-139	2.21359	0.841	0.388	9.0070921121188e-135	5
Tagln2	3.9642159429385e-169	2.08594	0.992	0.843	8.81681267868951e-165	5
Ncam1	1.65132442929179e-116	2.05165	0.816	0.397	3.67271066318787e-112	5
Zeb2	1.69742276429096e-115	1.99681	0.801	0.361	3.77523797005952e-111	5
Col6a1	1.4841494077139e-99	1.7333	0.751	0.303	3.3008966976965e-95	5
Lsp1	4.27221661392196e-115	1.69118	0.946	0.737	9.50183697102383e-111	5
Rbp1	5.57159079418383e-191	1.64484	0.998	0.952	1.23917750853442e-186	5
Raph1	1.58318476976854e-88	1.51392	0.883	0.602	3.52116124644222e-84	5
Bgn	2.14076973516227e-87	1.40848	0.908	0.605	4.7612859679744e-83	5
Ebf1	5.53455196724686e-80	1.32999	0.91	0.681	1.23093970303537e-75	5
Mfap4	7.73497015696625e-49	1.2343	0.839	0.647	1.72033471261086e-44	5
Arpc1b	1.13467651845826e-59	1.12352	0.91	0.736	2.52363404470302e-55	5
Nid1	3.90818681520954e-47	1.10683	0.757	0.489	8.69219829570754e-43	5
Mfap2	1.4307155895699e-81	1.07875	0.979	0.898	3.18205454276242e-77	5
Lgals1	7.13073006194869e-126	1.06858	1	0.997	1.58594567307801e-121	5
Gm10169	3.43106129816605e-75	1.04715	0.973	0.743	7.63102343325112e-71	5
Sox9	9.40331856415813e-52	0.955162	0.874	0.565	2.09139208185441e-47	5
Fscn1	9.30905080945594e-44	0.948461	0.797	0.611	2.07042599053109e-39	5
Csrp1	5.86032774230444e-74	0.935644	0.975	0.909	1.30339549316593e-69	5
Ugp2	2.00743330371626e-46	0.899677	0.929	0.856	4.46473241079533e-42	5
B2m	4.12392292347697e-67	0.849375	0.992	0.851	9.17201697410513e-63	5
Sfrp1	1.07158650172952e-26	0.836773	0.849	0.754	2.38331553849663e-22	5
Cnn2	6.89080560672064e-42	0.829106	0.925	0.777	1.53258407499074e-37	5
Nfia	9.53579493724828e-46	0.824511	0.962	0.845	2.12085615199339e-41	5
Il11ra1	6.73482646598467e-31	0.8105	0.755	0.519	1.49789275429965e-26	5
Tcf4	9.4254162847896e-28	0.799804	0.77	0.563	2.09630683590005e-23	5
Sept11	6.1815787690888e-27	0.781356	0.759	0.601	1.37484493403304e-22	5
Ccnd1	4.94572773986975e-39	0.752266	0.889	0.716	1.09997930662443e-34	5
Limd2	1.39984438265161e-37	0.74297	0.893	0.744	3.11339389145545e-33	5
Gm4204	2.35581238138558e-30	0.728578	0.824	0.605	5.23956231743966e-26	5
Eva1b	8.08475062550539e-37	0.725577	0.931	0.829	1.79812938661865e-32	5
Golga7	1.99897357188854e-31	0.718504	0.864	0.748	4.4459171212373e-27	5
Tmsb4x	3.36466750459103e-92	0.716054	1	1	7.48335699696092e-88	5
Socs2	7.85399311403539e-21	0.710321	0.759	0.608	1.74680660849261e-16	5
Fbn1	1.15830455381392e-29	0.704277	0.837	0.7	2.57618515813753e-25	5
Itm2b	2.06324830428497e-33	0.701921	0.964	0.94	4.5888705535602e-29	5
Actn1	9.7533606616158e-32	0.659869	0.858	0.732	2.16924494474997e-27	5
Fstl1	5.206404806796e-42	0.658102	0.979	0.948	1.1579564930795e-37	5
Ccnd2	5.38728090364956e-40	0.627665	0.994	0.939	1.1981851457807e-35	5
Prdx6	2.25582968689704e-18	0.615215	0.893	0.833	5.0171908066277e-14	5
Tcf21	2.9529293470419e-37	0.610522	0.979	0.904	6.56761016075588e-33	5
Maged2	1.26145895378752e-19	0.607338	0.818	0.691	2.80561085911882e-15	5
Gm4366	2.33331737118455e-30	0.576974	0.939	0.71	5.18953116525155e-26	5
Serinc3	5.14910176129727e-17	0.576416	0.759	0.646	1.14521172273013e-12	5
Slc25a5	4.16731514802334e-18	0.548926	0.956	0.941	9.26852562071872e-14	5
Cd63	1.14383483917774e-20	0.542034	0.948	0.899	2.5440030658152e-16	5
Vamp5	7.37318979502795e-16	0.539625	0.795	0.62	1.63987114231217e-11	5
Tmem258	2.39228299807029e-47	0.535477	0.996	0.979	5.32067661600814e-43	5
Rps6-ps4	3.05140518907962e-41	0.526332	0.994	0.787	6.78663028103199e-37	5
Ppdpf	4.53216234201853e-36	0.517847	0.983	0.956	1.00799822648834e-31	5
Rps2-ps10	1.02677590149064e-29	0.512209	0.994	0.781	2.28365228250534e-25	5
Gm8624	2.35010181954726e-25	0.503239	0.971	0.761	5.22686145685506e-21	5
1810022K09Rik	6.58687530108215e-18	0.502035	0.902	0.715	1.46498693571368e-13	5
Spon2	2.55187449617556e-18	0.501701	0.91	0.762	5.67562406694407e-14	5
Myadm	1.29225993247547e-12	0.501331	0.757	0.639	2.87411531581869e-08	5
Rarres2	3.94372390938265e-11	0.498759	0.762	0.684	8.77123634685795e-07	5
Gm10073	2.46036231209982e-28	0.495097	0.99	0.784	5.4720918183412e-24	5
Gm8186	1.04775001118589e-29	0.49425	0.987	0.778	2.33030079987853e-25	5
Rpl6l	3.80112888387597e-30	0.477576	0.994	0.787	8.45409075062855e-26	5
Rps23-ps1	1.55437285858236e-35	0.476758	0.994	0.787	3.45708067477303e-31	5
Fam96a	1.2894322245178e-20	0.474215	0.91	0.714	2.86782621055004e-16	5
Loxl2	5.06934627277996e-14	0.468182	0.9	0.844	1.12747330452899e-09	5
Gm10288	1.21938417693414e-24	0.462768	0.987	0.779	2.71203234791921e-20	5
Nhp2l1	8.86744701976272e-24	0.461948	0.985	0.778	1.97220889166543e-19	5
1110008F13Rik	4.99026454598239e-18	0.459445	0.879	0.682	1.10988473767194e-13	5
Fkbp1a	5.52971712652788e-40	0.455136	1	0.999	1.22986438611106e-35	5
Smc6	2.0182255849423e-12	0.452788	0.822	0.77	4.48873552347016e-08	5
Rdx	2.15223924785337e-21	0.452044	0.973	0.941	4.78679531115067e-17	5
Ptp4a1	2.00857336690747e-18	0.448392	0.906	0.702	4.4672680253389e-14	5
Rps11-ps1	3.8729819102889e-27	0.444549	0.994	0.787	8.61389906667353e-23	5
Gm8430	6.86574816273641e-30	0.442489	0.994	0.787	1.52701104887421e-25	5
Rpl19-ps11	7.83729259280494e-25	0.440676	0.99	0.783	1.74309224556575e-20	5
2310036O22Rik	7.26176979118523e-21	0.439547	0.981	0.766	1.61509021925751e-16	5
Gm2225	8.91581058153934e-19	0.43242	0.935	0.729	1.98296543144016e-14	5
Igfbp4	1.88350301986967e-15	0.429623	0.921	0.843	4.18909906649213e-11	5
Rps25-ps1	1.81863674234706e-16	0.428967	0.877	0.696	4.04482997865409e-12	5
Shfm1	1.07398216090658e-24	0.42669	0.994	0.787	2.38864372407232e-20	5
mt-Rnr2	2.24417086907167e-18	0.424962	0.99	0.786	4.9912604299023e-14	5
Rpl18-ps2	3.33256248787942e-12	0.423497	0.753	0.585	7.41195222929262e-08	5
Gm13436	2.23076463018502e-18	0.420199	0.973	0.763	4.96144361399449e-14	5
Gm10275	1.10048427661055e-19	0.418059	0.958	0.767	2.44758707960951e-15	5
Tcf12	7.62235874861452e-10	0.4171	0.77	0.678	1.69528880927936e-05	5
2010107E04Rik	4.70944623299587e-22	0.417078	0.994	0.787	1.04742793668061e-17	5
Gm9843	1.35746391471382e-22	0.416259	0.994	0.787	3.01913549271501e-18	5
Sept7	2.43323772621069e-20	0.414285	0.977	0.956	5.4117640268652e-16	5
Rps16-ps2	1.49217666553703e-22	0.412716	0.994	0.786	3.3187501218209e-18	5
Rpl34-ps1	1.41224975057168e-16	0.411386	0.923	0.718	3.14098467024648e-12	5
Wdr89	2.67351687690792e-29	0.411087	1	0.917	5.9461688859309e-25	5
Rpl3-ps1	1.11877207365147e-20	0.410982	0.994	0.786	2.48826096900823e-16	5
Rps10-ps2	9.16442481502568e-22	0.405007	0.994	0.787	2.03825972310986e-17	5
Rpl21-ps8	2.81809414450211e-17	0.404922	0.948	0.754	6.26772318678714e-13	5
Rpl37rt	2.41442828567945e-20	0.401333	0.994	0.787	5.36992995017967e-16	5
2700060E02Rik	2.93791797266102e-18	0.400773	0.985	0.78	6.53422336299538e-14	5
Minos1	6.6124247659895e-18	0.399483	0.979	0.78	1.47066939220372e-13	5
Hmga2	1.45652998796652e-14	0.399352	0.96	0.937	3.23946834623635e-10	5
2810428I15Rik	1.34725536341669e-11	0.398887	0.766	0.603	2.99643065377506e-07	5
