# Supplementary material for: Wt1+/Itga4+ progenitors drive epicardial-derived cell expansion via non-canonical Wnt signalling
Source: Research Square preprint supplement (doi:10.21203/rs.3.rs-4842079/v1), 2024-08-07
Supplement: Supplementary file 26 [file Suppl. dataset 5 RNA-seq PEvsHeart.xlsx]

## Sheet: sample
Supplemental dataset 5. Differential gene expression in PE and Heart samples from E9.5 embryos (RNA-seq)
			PE vs Heart		Expression values
	Ensembl gene ID	Gene	log2FoldChange	padj	PE1	PE2	PE3	Heart1	Heart2	Heart3
1	ENSMUSG00000000001	Gnai3	1.50891	1.39741e-10	11.8948	12.3973	11.9555	10.2584	10.5183	10.9256
2	ENSMUSG00000000028	Cdc45	-0.242864	0.280533	10.7375	10.9181	10.8175	11.0705	11.2244	10.892
3	ENSMUSG00000000031	H19	0.0531884	0.828704	18.07	17.7429	17.9395	17.8792	17.6681	18.0402
4	ENSMUSG00000000037	Scml2	-0.956505	0.375165	6.57796	4.82807	5.34862	6.71715	5.95435	7.14406
5	ENSMUSG00000000056	Narf	0.0628108	0.870009	11.2624	11.2292	11.2659	11.1656	11.3596	11.0248
6	ENSMUSG00000000058	Cav2	-2.33912	0.213704	3.52974	2	5.30603	6.2817	6.25754	6.22328
7	ENSMUSG00000000078	Klf6	1.16256	2.99331e-05	10.9589	11.2501	10.8363	9.74301	9.89763	9.95127
8	ENSMUSG00000000085	Scmh1	-0.949933	1.37698e-07	10.0916	10.2508	10.1209	10.9557	11.071	11.2668
9	ENSMUSG00000000088	Cox5a	-1.52436	9.37749e-28	11.7485	11.6434	11.7329	13.2211	13.3428	13.1246
10	ENSMUSG00000000093	Tbx2	0.353417	0.192555	11.6064	11.4571	11.3691	10.864	11.2723	11.2151
11	ENSMUSG00000000094	Tbx4	2.85647	0.164183	5.50847	5.52282	5.07188	3.36817	3.73579	2
12	ENSMUSG00000000120	Ngfr	2.71064	0.00290491	7.44959	8.1256	7.52496	4.92396	6.19772	2
13	ENSMUSG00000000125	Wnt3	2.60119	0.0887799	6.27809	5.3609	4.27873	3.50843	4.12646	2
14	ENSMUSG00000000126	Wnt9a	2.55446	4.39316e-09	8.21665	8.28761	8.55994	5.82564	6.25754	5.48652
15	ENSMUSG00000000127	Fer	0.484778	0.134699	8.93103	9.4432	9.0507	8.5142	8.562	8.92197
16	ENSMUSG00000000131	Xpo6	0.602378	1.18031e-05	12.5161	12.697	12.3438	11.8896	11.9238	11.9592
17	ENSMUSG00000000134	Tfe3	0.253314	0.130426	11.1961	11.2085	11.2308	10.9224	11.0042	10.9491
18	ENSMUSG00000000142	Axin2	0.686147	0.0400926	9.60151	9.34699	9.26876	8.53895	8.82512	8.81438
19	ENSMUSG00000000148	Brat1	0.239813	0.352289	10.0613	10.3715	9.9807	9.84907	9.96945	9.90706
20	ENSMUSG00000000149	Gna12	-0.353932	0.0683505	11.9659	11.8856	11.7837	12.209	12.1468	12.3396
21	ENSMUSG00000000154	Slc22a18	-2.57486	0.177672	3.93772	2	3.12789	5.52893	4.90187	4.99488
22	ENSMUSG00000000167	Pih1d2	-0.217919	0.919282	5.41583	5.01389	6.29791	4.82011	6.31498	6.10301
23	ENSMUSG00000000168	Dlat	-1.33035	6.20295e-14	11	11.3046	10.9101	12.472	12.4958	12.2518
24	ENSMUSG00000000171	Sdhd	-1.27062	9.50356e-16	12.1109	12.0438	12.0756	13.4374	13.3142	13.2845
25	ENSMUSG00000000183	Fgf6	-6.79471	0.0374668	2	2	2	4.70819	5.04454	3.99561
26	ENSMUSG00000000184	Ccnd2	-1.54694	3.80733e-14	12.1093	12.7635	11.9777	13.949	13.7321	13.9266
27	ENSMUSG00000000194	Gpr107	0.25136	0.0996038	12.109	12.0045	12.0744	11.8037	11.8824	11.7474
28	ENSMUSG00000000202	Btbd17	6.25736	0.0168701	4.83467	3.97401	3.47409	2	2	2
29	ENSMUSG00000000214	Th	-1.92453	0.231145	3.40676	2	5.02012	5.27767	6.13531	5.1241
30	ENSMUSG00000000215	Ins2	-1.35293	#N/A	3.40676	2	2	2	2	4.38758
31	ENSMUSG00000000223	Drp2	0.72498	0.551709	6.11088	6.72143	4.59405	4.97322	4.99853	5.94872
32	ENSMUSG00000000244	Tspan32	-0.751086	0.350721	6.70083	6.4098	8.44196	8.18371	8.34477	8.11835
33	ENSMUSG00000000247	Lhx2	8.10733	8.46538e-97	11.1217	11.5805	11.2186	3.63625	4.03826	3.45571
34	ENSMUSG00000000253	Gmpr	-1.75072	0.0050106	9.96516	9.77597	10.6783	12.1089	12.0219	11.6542
35	ENSMUSG00000000266	Mid2	-3.5904	5.85673e-17	6.07094	6.21502	6.27601	9.49368	9.75099	9.84748
36	ENSMUSG00000000275	Trim25	-0.471021	0.0144341	9.71925	9.56347	9.69734	10.1094	10.2392	10.0358
37	ENSMUSG00000000276	Dgke	-0.00738086	0.99552	7.77581	8.46547	7.86282	7.94536	7.77777	8.42467
38	ENSMUSG00000000278	Scpep1	0.0690028	0.831812	10.7174	10.6873	10.6044	10.4554	10.5008	10.8207
39	ENSMUSG00000000282	Mnt	0.582625	0.000870249	10.8509	11.0341	10.8994	10.2596	10.3068	10.4719
40	ENSMUSG00000000290	Itgb2	-2.59067	0.18956	3.7481	2	4.09079	6.15935	5.57001	4.80234
41	ENSMUSG00000000295	Hddc2	-0.263236	0.597597	9.05395	8.75672	9.47748	9.81401	9.33356	8.85838
42	ENSMUSG00000000296	Tpd52l1	0.633402	0.12378	8.41714	8.64858	8.53249	8.01169	7.67914	8.01661
43	ENSMUSG00000000301	Pemt	-1.79031	0.000225178	6.83805	7.15603	6.92307	8.97046	8.8769	8.26569
44	ENSMUSG00000000303	Cdh1	4.10229	8.64497e-06	8.63484	9.45929	7.53422	3.36817	5.93005	3.9026
45	ENSMUSG00000000305	Cdh4	-0.0304483	0.982924	5.70396	6.66703	6.13713	6.35785	6.45783	5.87719
46	ENSMUSG00000000308	Ckmt1	-3.89342	0.000719752	3.84602	2	2.91765	6.54866	6.13531	5.82745
47	ENSMUSG00000000317	Bcl6b	-2.5846	5.48814e-10	5.92172	8.04791	7.29384	9.97229	9.88662	9.78208
48	ENSMUSG00000000320	Alox12	-1.96509	0.118819	5.53807	6.13712	5.30603	7.95152	7.50909	7.19398
49	ENSMUSG00000000326	Comt	-0.787574	0.000356038	10.2284	9.7533	10.3346	11.0076	10.7468	10.9671
50	ENSMUSG00000000339	Rtca	-0.203429	0.578753	10.7581	11.1201	10.876	11.1232	11.1335	11.1305
51	ENSMUSG00000000340	Dbt	-0.677838	0.00529305	9.2275	9.73193	9.38587	10.0997	10.3045	9.99558
52	ENSMUSG00000000346	Dazap2	-0.306858	0.0786217	12.1118	11.9187	12.0432	12.3456	12.3245	12.3298
53	ENSMUSG00000000355	Mcts1	0.241126	0.68495	8.08747	8.32322	8.72261	8.33268	7.98661	8.14905
54	ENSMUSG00000000359	Rem1	0.72446	0.157293	8.27495	7.98815	7.78742	7.5175	7.26862	7.15418
55	ENSMUSG00000000365	Rnf17	0.747107	0.677249	3.52974	6.58138	5.17014	5.79857	4.56565	3.45571
56	ENSMUSG00000000374	Trappc10	-0.310997	0.123061	10.883	10.8669	10.7535	11.266	11.1979	10.9571
57	ENSMUSG00000000378	Ccm2	0.16261	0.47689	11.6533	11.441	11.555	11.4127	11.2879	11.4638
58	ENSMUSG00000000384	Tbrg4	-0.800792	8.8784e-06	11.791	11.5194	11.8566	12.6577	12.6097	12.2951
59	ENSMUSG00000000385	Tmprss2	1.61253	0.0473894	6.39594	6.89713	3.98676	4.92396	4.62741	4.63894
60	ENSMUSG00000000399	Ndufa9	-0.808038	3.32144e-06	11.8534	11.7318	11.7852	12.6518	12.5665	12.5754
61	ENSMUSG00000000402	Egfl6	3.36231	0.209447	5.47825	2	4.09079	2.84054	2.60209	2
62	ENSMUSG00000000409	Lck	1.32232	0.0366625	7.16654	6.17659	7.15674	5.95386	5.80198	5.03925
63	ENSMUSG00000000416	Cttnbp2	-0.921284	0.271175	7.28475	5.9217	6.95098	7.18264	7.76408	8.0817
64	ENSMUSG00000000420	Galnt1	0.0384386	0.888383	11.5875	11.6881	11.6534	11.505	11.4398	11.8381
65	ENSMUSG00000000439	Mkrn2	-0.0285068	0.942393	9.67829	10.0139	9.6745	9.8408	9.88188	9.75406
66	ENSMUSG00000000440	Pparg	-6.43938	0.0894237	2	2	2	5.35403	4.03826	2
67	ENSMUSG00000000441	Raf1	-0.203667	0.385595	11.3317	11.3847	10.8714	11.4523	11.3777	11.4215
68	ENSMUSG00000000486	Septin1	-2.41302	1.63027e-09	7.43393	6.32451	6.71092	9.51047	9.2378	9.03037
69	ENSMUSG00000000489	Pdgfb	-1.90605	0.00129306	5.09581	6.55167	5.54455	7.76132	7.50909	7.80161
70	ENSMUSG00000000530	Acvrl1	-2.18885	2.1196e-05	6.05054	7.13614	6.25377	9.00047	8.99875	7.8208
71	ENSMUSG00000000531	Tamalin	-2.80967	1.43177e-06	6.78965	4.55605	7.27188	9.53937	9.20019	9.26565
72	ENSMUSG00000000532	Acvr1b	-0.409719	0.0210157	10.9291	10.5727	10.672	11.1388	11.178	11.1072
73	ENSMUSG00000000538	Tom1l2	-0.92008	2.73364e-07	10.1787	9.78876	10.1392	10.9792	10.9531	10.9571
74	ENSMUSG00000000544	Gpa33	-1.01985	0.82639	2	2	4.36425	3.63625	2.82934	4.69549
75	ENSMUSG00000000552	Zfp385a	-0.177866	0.397548	11.0573	11.2996	10.9855	11.2423	11.4446	11.1957
76	ENSMUSG00000000555	Itga5	-1.2313	3.73747e-32	12.5496	12.7201	12.5558	13.8723	13.9	13.7479
77	ENSMUSG00000000561	Wdr77	-0.0212799	0.946907	11.2013	11.39	11.3522	11.3563	11.2448	11.4078
78	ENSMUSG00000000563	Atp5pb	-0.837209	7.80437e-10	12.4912	12.5731	12.7547	13.5638	13.4632	13.3028
79	ENSMUSG00000000567	Sox9	3.13125	2.01346e-38	12.5603	12.6913	12.6829	9.23309	9.82535	9.44333
80	ENSMUSG00000000568	Hnrnpd	0.523413	0.000158706	13.6195	13.6441	13.7746	13.0083	13.1359	13.3127
81	ENSMUSG00000000579	Dynlt1c	0.128793	0.853631	8.39305	7.94879	7.67476	7.89513	7.6571	8.13889
82	ENSMUSG00000000581	C1d	0.502064	0.146525	9.82059	9.67621	9.55909	9.14718	8.97519	9.41414
83	ENSMUSG00000000594	Gm2a	-1.63952	2.44616e-27	10.1939	10.0726	9.95336	11.6752	11.6134	11.8408
84	ENSMUSG00000000600	Krit1	0.475672	0.194583	9.10181	9.52957	9.35747	8.72298	8.86733	8.99982
85	ENSMUSG00000000605	Clcn4	0.203721	0.562449	9.38444	10.0435	9.86443	9.56971	9.53433	9.65417
86	ENSMUSG00000000617	Grm6	-7.00747	0.00358858	2	2	2.37445	6.11615	5.29345	5.51822
87	ENSMUSG00000000627	Sema4f	0.273397	0.949449	4.78616	2.79256	2.91765	2	2	4.85294
88	ENSMUSG00000000628	Hk2	-0.736749	5.9355e-08	12.15	12.2221	12.1143	12.7819	12.8241	13.0738
89	ENSMUSG00000000631	Myo18a	-2.47839	6.22537e-71	12.0341	11.8867	11.7803	14.2934	14.4539	14.3926
90	ENSMUSG00000000632	Sez6	3.21367	0.0378121	5.6234	5.01389	4.72914	2.61084	3.61902	2
91	ENSMUSG00000000686	Abhd15	-0.834045	0.841886	4.73595	2	2	3.36817	5.25484	2
92	ENSMUSG00000000690	Hoxb6	3.56716	0.00012085	6.53457	6.96634	6.44256	3.50843	3.84381	3.45571
93	ENSMUSG00000000693	Loxl3	1.16218	0.0280019	9.04108	9.19909	8.87971	7.80278	8.02154	7.85843
94	ENSMUSG00000000706	Btn1a1	-3.38806	#N/A	2.55761	2	2.37445	2	3.49196	4.85294
95	ENSMUSG00000000708	Kat2b	-0.445614	0.422069	7.21316	7.84236	7.84805	8.15198	7.93259	8.20368
96	ENSMUSG00000000711	Rab5b	-0.10964	0.662661	11.5572	11.6172	11.3775	11.6918	11.5371	11.6582
97	ENSMUSG00000000731	Aire	1.01192	0.52498	4.2554	4.87681	4.91066	4.30847	3.35262	3.9026
98	ENSMUSG00000000732	Icosl	0.610709	0.400767	7.45736	6.89713	7.19226	6.62769	6.31498	6.83984
99	ENSMUSG00000000738	Spg7	-0.616637	0.000133723	11.0126	11.1863	11.1013	11.8315	11.7143	11.5973
100	ENSMUSG00000000739	Sult5a1	-0.313813	0.505875	7.99977	8.18971	7.91335	8.5471	8.36758	8.09752
101	ENSMUSG00000000740	Rpl13	-0.152732	0.496503	15.178	14.8619	15.0659	15.3996	15.2537	14.8797
102	ENSMUSG00000000743	Chmp1a	-0.250929	0.182631	12.2355	12.0093	12.089	12.4906	12.4433	12.1366
103	ENSMUSG00000000751	Rpa1	-0.142598	0.34771	12.8289	12.854	12.8174	12.9669	13.0178	12.9425
104	ENSMUSG00000000753	Serpinf1	2.3442	1.14624e-29	10.4949	11.1365	10.5416	8.52663	8.51375	8.21339
105	ENSMUSG00000000759	Tubgcp3	0.231818	0.249499	10.8634	11.0138	10.7781	10.6526	10.6882	10.6308
106	ENSMUSG00000000776	Polr3d	0.187181	0.407378	10.9993	10.9597	11.0246	10.8251	10.7692	10.8286
107	ENSMUSG00000000782	Tcf7	0.0486414	0.904897	10.1752	9.87378	9.90066	9.88811	10.0421	9.88899
108	ENSMUSG00000000787	Ddx3x	0.723809	6.58904e-05	13.0574	13.3243	13.2752	12.2942	12.5117	12.6699
109	ENSMUSG00000000792	Slc5a5	0.480022	0.840259	3.64305	2	4.59405	2.33751	3.84381	3.69639
110	ENSMUSG00000000794	Kcnn3	1.70941	0.351764	4.92707	4.92397	5.43021	3.63625	4.56565	2
111	ENSMUSG00000000804	Usp32	0.537144	0.0894966	9.76534	9.03428	9.78911	8.93981	9.11651	9.04404
112	ENSMUSG00000000805	Car4	0.527703	0.0413521	10.9873	10.9793	10.2848	10.3048	10.1513	10.3183
113	ENSMUSG00000000811	Txnrd3	-0.330824	0.439683	8.81793	8.30552	8.75067	9.05009	9.01617	8.8334
114	ENSMUSG00000000823	Zfp512b	0.136577	0.598384	10.9927	11.009	10.9418	10.7972	10.7284	10.9963
115	ENSMUSG00000000826	Dnajc5	-0.347635	0.00679232	12.3282	12.1986	12.2437	12.6226	12.4932	12.6929
116	ENSMUSG00000000827	Tpd52l2	0.129922	0.478624	11.7338	11.5194	11.6802	11.5351	11.4643	11.5516
117	ENSMUSG00000000838	Fmr1	0.33802	0.45745	10.2786	10.2061	10.2289	9.44214	9.78865	10.3318
118	ENSMUSG00000000861	Bcl11a	2.46375	9.44569e-09	8.65862	8.87242	8.41215	6.46504	6.42342	5.80192
119	ENSMUSG00000000869	Il4	-0.597374	0.799753	5.05544	2	5.58073	4.05757	5.90532	5.51822
120	ENSMUSG00000000876	Pxmp4	-0.113093	0.775112	9.179	9.23459	9.01147	9.23309	9.18229	9.35174
121	ENSMUSG00000000881	Dlg3	1.28588	9.10126e-08	9.7385	9.70856	9.88266	8.37911	8.20996	8.83969
122	ENSMUSG00000000884	Gnb1l	-0.242035	0.60969	8.33941	7.89063	8.06154	8.45475	8.46383	8.09752
123	ENSMUSG00000000901	Mmp11	2.12768	3.36531e-21	10.1951	10.285	10.1796	8.10303	8.40333	7.74914
124	ENSMUSG00000000902	Smarcb1	0.140656	0.472229	12.87	12.7794	12.7488	12.6886	12.7992	12.4729
125	ENSMUSG00000000903	Vpreb3	0.448628	0.815347	4.45481	5.87447	4.72914	3.03864	4.50112	5.66703
126	ENSMUSG00000000915	Hip1r	0.0341516	0.934296	9.2161	8.99065	9.06354	9.16053	8.91764	9.08959
127	ENSMUSG00000000916	Nsun5	-0.387159	0.288657	9.67497	9.30753	9.62555	10.0331	10.0881	9.62717
128	ENSMUSG00000000934	Top1mt	-0.911527	0.0220401	6.99571	7.36695	7.5974	8.20963	8.23993	8.25161
129	ENSMUSG00000000938	Hoxa10	7.10937	0.00367305	5.50847	5.46022	6.23119	2	2.33223	2
130	ENSMUSG00000000942	Hoxa4	-0.488632	#N/A	4.78616	2	4.72914	2	5.74739	4.24331
131	ENSMUSG00000000948	Gm38393	0.404585	0.847295	5.50847	6.58138	5.26214	5.35403	5.08912	5.99451
132	ENSMUSG00000000957	Mmp14	0.476489	0.00305725	12.9152	12.8748	12.9361	12.2957	12.6717	12.2974
133	ENSMUSG00000000958	Slc7a7	-1.29915	0.0315956	6.1688	7.15603	6.42277	7.86934	8.03869	7.81443
134	ENSMUSG00000000959	Oxa1l	-1.32915	2.43643e-21	11.3594	11.3007	11.5431	12.7455	12.73	12.7214
135	ENSMUSG00000000976	Heatr6	0.00301836	0.996421	10.1787	10.2473	10.0371	9.98435	10.2293	10.235
136	ENSMUSG00000001016	Ilf2	0.389796	0.0128644	12.4509	12.5684	12.7567	12.1703	12.2359	12.2166
137	ENSMUSG00000001017	Chtop	-0.00844727	0.968391	12.5382	12.4599	12.5934	12.5163	12.4872	12.613
138	ENSMUSG00000001018	Snapin	-0.0842345	0.899904	8.90287	9.40215	9.60373	9.66084	9.50378	9.00262
139	ENSMUSG00000001025	S100a6	-0.295315	0.783234	7.10853	6.74788	6.89461	7.19307	7.16829	7.27042
140	ENSMUSG00000001027	Scn4a	-2.95465	0.0711324	5.21055	2	4.27873	5.62452	7.25889	7.53343
141	ENSMUSG00000001029	Icam2	-4.68586	2.45996e-74	6.50489	5.72273	6.53767	10.9935	11.0085	10.711
142	ENSMUSG00000001034	Mapk7	0.587886	2.01932e-06	11.6405	11.6855	11.6697	11.0368	11.0999	11.0974
143	ENSMUSG00000001036	Epn2	-0.0787433	0.807907	10.8902	10.7302	10.611	10.7687	10.776	10.9308
144	ENSMUSG00000001039	B9d1	0.716682	0.03211	9.69973	9.15531	9.33646	8.81028	8.76799	8.51777
145	ENSMUSG00000001052	Sec24b	0.363146	0.0182892	11.7949	11.9411	11.8529	11.4149	11.4425	11.6367
146	ENSMUSG00000001053	N4bp3	-0.874302	0.000323723	8.37676	8.61664	8.7743	9.52085	9.50172	9.36705
147	ENSMUSG00000001054	Rmnd5b	-0.330128	0.221654	9.80697	9.93261	9.97221	10.3684	10.2962	10.0152
148	ENSMUSG00000001056	Nhp2	-0.0299356	0.930488	12.3663	12.0045	12.354	12.4983	12.2844	12.021
149	ENSMUSG00000001062	Vps9d1	-0.337069	0.312872	9.52597	8.99342	9.63418	9.88329	9.74578	9.59223
150	ENSMUSG00000001065	Zfp276	-0.138053	0.778063	9.45209	9.1798	8.93666	9.42675	9.54837	8.99701
151	ENSMUSG00000001082	Mfsd10	0.243187	0.336111	10.963	10.591	10.9744	10.6152	10.7213	10.486
152	ENSMUSG00000001089	Luzp1	0.372659	0.190242	11.2713	11.4186	11.053	10.7591	10.7905	11.079
153	ENSMUSG00000001098	Kctd10	0.129316	0.471705	12.0009	11.8151	11.7578	11.7218	11.8065	11.6666
154	ENSMUSG00000001100	Poldip2	-0.517083	0.0214953	11.7826	11.7528	11.6802	12.4202	12.3825	11.9112
155	ENSMUSG00000001105	Ift20	0.149031	0.68495	9.44233	9.96538	9.60153	9.54955	9.43203	9.62717
156	ENSMUSG00000001119	Col6a1	1.073	6.57881e-07	10.6161	10.7597	10.7654	9.27543	9.86755	9.73058
157	ENSMUSG00000001120	Pcbp3	0.513729	0.0937644	9.35147	9.18948	9.44104	8.6339	8.8864	8.92493
158	ENSMUSG00000001123	Lgals9	-3.18259	8.0545e-05	3.7481	5.09854	5.21688	7.57447	8.02154	7.78867
159	ENSMUSG00000001127	Araf	-0.349977	0.115748	10.9052	10.568	10.699	11.0691	10.8246	11.3065
160	ENSMUSG00000001128	Cfp	-0.135515	0.895839	5.96595	7.12609	6.25377	7.03967	6.37022	6.5022
161	ENSMUSG00000001131	Timp1	-0.103037	0.828704	8.38899	8.51636	8.58687	8.82377	8.61632	8.32065
162	ENSMUSG00000001134	Uxt	-0.121383	0.815341	8.72125	9.15283	8.40207	8.87001	8.88007	8.98572
163	ENSMUSG00000001138	Cnnm3	0.221578	0.407378	10.4987	9.98497	10.3333	10.0816	10.167	9.944
164	ENSMUSG00000001143	Lman2l	-0.976781	5.85762e-05	10.2215	10.3842	9.96196	11.2118	11.2485	11.0555
165	ENSMUSG00000001150	Mcm3ap	0.234916	0.191652	11.9581	11.8013	11.8644	11.5351	11.7394	11.6425
166	ENSMUSG00000001151	Pcnt	0.359376	0.0840951	11.5394	11.862	11.4953	11.1925	11.4094	11.2379
167	ENSMUSG00000001155	Ftcd	-5.11242	1.11971e-12	3.40676	2	4.36425	8.31369	7.93259	7.85223
168	ENSMUSG00000001156	Mxd1	0.323727	0.43456	9.08436	8.84818	8.92967	8.28472	8.56988	8.97147
169	ENSMUSG00000001157	Gmcl1	0.70596	0.00134913	9.9195	10.0166	9.93251	9.00639	9.36109	9.36705
170	ENSMUSG00000001158	Snrnp27	0.297849	0.220284	9.78708	9.65715	9.73596	9.48097	9.36336	9.44745
171	ENSMUSG00000001166	Oas1c	-0.265299	0.920012	3.93772	4.77761	4.18782	4.76523	4.68664	4.16538
172	ENSMUSG00000001173	Ocrl	0.0910059	0.815347	9.65653	9.98497	9.37561	9.5021	9.55235	9.74572
173	ENSMUSG00000001175	Calm1	0.717416	9.40037e-07	13.8129	14.2061	13.9913	13.4335	13.3558	13.0718
174	ENSMUSG00000001211	Agpat3	-0.518307	0.00379775	10.9643	10.7483	10.671	11.2727	11.3222	11.3566
175	ENSMUSG00000001227	Sema6b	-0.716821	0.0834619	7.41809	7.65941	7.4487	8.26012	8.38556	7.97723
176	ENSMUSG00000001228	Uhrf1	0.352756	0.000847253	13.831	13.754	13.6799	13.4266	13.4447	13.3376
177	ENSMUSG00000001229	Dpp9	-0.0388336	0.882464	11.6255	11.5965	11.5568	11.6007	11.6488	11.6461
178	ENSMUSG00000001240	Ramp2	-3.21322	1.17042e-37	8.15111	9.24392	8.98134	12.1958	12.0852	11.8935
179	ENSMUSG00000001247	Lsr	1.75068	3.92823e-16	10.4567	10.8857	10.422	8.75854	8.94519	8.87684
180	ENSMUSG00000001248	Gramd1a	-0.568596	0.00580476	10.8091	10.8139	10.7936	11.572	11.3844	11.1292
181	ENSMUSG00000001249	Hpn	0.115935	0.854888	7.29346	6.73471	7.13257	6.90655	7.45049	6.29823
182	ENSMUSG00000001270	Ckb	-4.78038	6.96139e-179	9.53149	9.75981	9.45329	14.4687	14.5271	14.0405
183	ENSMUSG00000001280	Sp1	0.658492	0.00136844	11.7234	11.8759	11.51	10.9239	10.9056	11.2962
184	ENSMUSG00000001281	Itgb7	-0.331655	0.870425	3.12405	4.14296	3.87465	4.58685	4.28817	2.32076
185	ENSMUSG00000001285	Myg1	-0.119295	0.722991	11.4208	11.0712	11.4971	11.4642	11.6783	11.1987
186	ENSMUSG00000001288	Rarg	1.34649	3.90518e-06	10.0928	10.6065	9.96539	9.03567	9.1192	8.50201
187	ENSMUSG00000001289	Pfdn5	-0.111299	0.588234	11.7406	11.619	11.7223	11.9672	11.7985	11.6335
188	ENSMUSG00000001300	Efnb2	-1.21794	2.09115e-05	10.1717	10.6378	9.64062	11.4026	11.2837	11.5664
189	ENSMUSG00000001305	Rrp15	0.290096	0.210613	10.1939	10.591	10.6186	10.2459	10.176	10.149
190	ENSMUSG00000001313	Rnd2	-1.24675	5.77964e-12	12.1298	12.1594	12.1239	13.588	13.4067	13.1186
191	ENSMUSG00000001323	Srr	-0.191811	0.768637	7.48041	7.47381	7.77185	7.53401	7.5254	8.1541
192	ENSMUSG00000001333	Sync	-0.92707	0.828471	2.55761	2	3.12789	3.03864	3.61902	2
193	ENSMUSG00000001334	Fndc5	0.0118481	0.990104	7.26719	7.83003	7.3989	7.42317	7.50909	7.58673
194	ENSMUSG00000001348	Acp5	-0.00488452	0.995974	9.60326	8.69349	9.8754	9.5	9.34279	9.57726
195	ENSMUSG00000001349	Cnn1	-4.53854	6.43922e-162	9.52041	9.34915	9.68077	14.0164	14.0436	14.0988
196	ENSMUSG00000001366	Fbxo9	-0.868853	0.00174696	9.01501	8.42097	8.86512	9.87359	9.56622	9.48403
197	ENSMUSG00000001376	Vps50	0.53771	0.184511	8.85663	9.8465	9.39606	8.6339	8.79516	9.17906
198	ENSMUSG00000001380	Hars	0.242529	0.239134	11.7214	11.6936	11.9073	11.5376	11.5107	11.5559
199	ENSMUSG00000001383	Zmat2	0.372923	0.0838507	11.2362	11.3278	11.4465	10.8293	10.7151	11.2899
200	ENSMUSG00000001403	Ube2c	-0.748061	5.79344e-10	12.5575	12.7386	12.7746	13.5583	13.451	13.3022
201	ENSMUSG00000001415	Smg5	-0.811611	1.84851e-07	12.472	12.2434	12.3176	13.2404	13.1881	13.0403
202	ENSMUSG00000001416	Cct3	-0.268218	0.0592496	14.3611	14.2723	14.3698	14.6574	14.6095	14.5404
203	ENSMUSG00000001418	Glmp	-0.296954	0.135866	10.7838	10.4889	10.7525	10.815	11.071	11.0324
204	ENSMUSG00000001419	Mef2d	-1.57548	2.22262e-46	11.4459	11.2804	11.3819	12.9504	12.9049	12.9789
205	ENSMUSG00000001420	Tmem79	0.0928125	0.950827	6.4592	6.39314	6.48136	6.37628	6.52428	6.14423
206	ENSMUSG00000001424	Snd1	-0.523783	2.39852e-05	13.5374	13.4222	13.6702	14.0508	14.1352	14.0228
207	ENSMUSG00000001435	Col18a1	-0.988898	3.04691e-15	14.5214	14.487	14.4191	15.4344	15.6318	15.3114
208	ENSMUSG00000001436	Slc19a1	-0.0875873	0.831771	9.81757	9.29861	9.58382	9.76416	9.64112	9.5978
209	ENSMUSG00000001440	Kpnb1	0.391687	0.000485809	14.7941	14.9965	14.762	14.3889	14.4504	14.5455
210	ENSMUSG00000001441	Npepps	-0.146049	0.492316	11.9666	12.255	12.0488	12.0923	12.2331	12.3835
211	ENSMUSG00000001445	Mrpl10	-0.206432	0.264388	11.3902	11.176	11.2624	11.5217	11.5476	11.3806
212	ENSMUSG00000001467	Cyp51	0.091546	0.836162	11.5367	11.5864	11.8552	11.5376	11.2998	11.8365
213	ENSMUSG00000001472	Tcf25	-0.140462	0.415721	13.2407	13.3059	13.2776	13.4004	13.4491	13.3961
214	ENSMUSG00000001473	Tubb6	-0.437249	0.00163486	12.405	12.6461	12.3952	12.9077	12.9443	12.9195
215	ENSMUSG00000001482	Def8	-0.783701	2.16579e-05	11.6684	11.1087	11.4629	12.2719	12.3149	12.0416
216	ENSMUSG00000001493	Meox1	2.26504	0.354003	7.29346	6.5666	6.85083	3.36817	4.62741	5.66703
217	ENSMUSG00000001494	Sost	-2.44923	1.41079e-11	6.20616	6.77385	6.13713	8.91167	8.99583	8.41628
218	ENSMUSG00000001496	Nkx2-1	0.963739	0.879184	2.30558	2	2	2	2	2
219	ENSMUSG00000001497	Pax9	-3.40996	#N/A	2	2	2	2.33751	2	3.16668
220	ENSMUSG00000001504	Irx2	-3.58084	0.0168974	7.08866	7.35839	6.27601	10.6181	10.3556	10.5574
221	ENSMUSG00000001506	Col1a1	2.40171	9.96761e-05	14.357	15.016	14.5121	11.0662	13.1131	11.8408
222	ENSMUSG00000001507	Itga3	0.426995	0.052518	11.361	11.4751	11.1682	10.7467	10.931	11.0488
223	ENSMUSG00000001508	Sgca	-8.05313	3.83784e-05	2	2	3.47409	9.42896	9.36109	8.98004
224	ENSMUSG00000001510	Dlx3	2.17939	0.327771	6.22448	5.96744	3.47409	3.50843	4.74353	2
225	ENSMUSG00000001517	Foxm1	0.146077	0.414153	11.9992	12.1289	11.8215	11.8193	11.8577	11.8517
226	ENSMUSG00000001518	Itfg2	-0.348198	0.151585	10.0434	9.79035	9.84038	10.2359	10.3372	10.149
227	ENSMUSG00000001520	Nrip2	-0.254984	0.791154	6.42792	6.83681	5.78062	6.24206	7.07162	6.53356
228	ENSMUSG00000001521	Tulp3	0.542689	0.0157541	11.1792	10.9667	11.2085	10.6297	10.6909	10.4057
229	ENSMUSG00000001524	Gtf2h4	-0.171281	0.638893	10.2916	9.73027	10.477	10.3889	10.3372	10.3833
230	ENSMUSG00000001525	Tubb5	-0.220357	0.149474	17.073	16.903	17.0885	17.2297	17.3208	17.1787
231	ENSMUSG00000001542	Ell2	1.43628	0.00231833	8.79666	8.16048	9.66821	7.77528	7.58887	7.37799
232	ENSMUSG00000001552	Jup	-0.845332	2.89772e-07	12.4715	12.3043	12.7067	13.3197	13.4611	13.2567
233	ENSMUSG00000001555	Fkbp10	0.27544	0.0923032	12.9427	12.8193	12.8447	12.6034	12.6673	12.5089
234	ENSMUSG00000001558	Klhl10	0.689748	0.848561	4.10528	2	3.98676	3.03864	3.73579	2.58301
235	ENSMUSG00000001569	Nom1	0.52977	0.00784104	10.3313	10.3262	10.4132	9.94477	9.84173	9.69114
236	ENSMUSG00000001576	Ergic1	-0.512725	0.000160511	12.5341	12.4886	12.3543	13.0445	12.8561	13.013
237	ENSMUSG00000001583	Tnk1	1.12977	0.556333	4.02393	2	3.31135	3.21279	2.82934	2
238	ENSMUSG00000001588	Acap1	-3.74996	1.59378e-15	5.28228	6.8733	5.58073	10.0141	9.65971	9.56403
239	ENSMUSG00000001604	Tcea3	-2.40518	9.66465e-16	7.74441	7.39232	7.50627	9.89931	9.95897	9.94837
240	ENSMUSG00000001627	Ifrd1	-0.413571	0.411847	9.25003	8.77291	9.59933	9.52085	9.22786	10.0869
241	ENSMUSG00000001630	Stk38l	0.420224	0.348992	9.20461	9.23693	9.35486	8.82041	8.93301	8.79186
242	ENSMUSG00000001632	Brpf1	-0.0356028	0.921703	10.6538	10.1724	10.5967	10.6104	10.5039	10.4567
243	ENSMUSG00000001642	Akr1b3	-0.398068	0.132819	12.1506	11.6804	11.6271	12.3265	12.2263	12.1531
244	ENSMUSG00000001656	Hoxc11	6.19694	#N/A	4.10528	2	5.02012	2	2	2
245	ENSMUSG00000001657	Hoxc8	3.32284	0.227841	5.44738	4.55605	6.11262	2	4.03826	2
246	ENSMUSG00000001661	Hoxc6	2.59264	0.0873529	6.36324	6.52132	5.50743	2.84054	3.73579	4.69549
247	ENSMUSG00000001663	Gstt1	-1.39385	0.000580683	7.5547	7.66636	7.24957	8.31846	9.24521	8.91604
248	ENSMUSG00000001665	Gstt3	-1.13757	0.386602	5.6776	2	4.79222	5.85221	5.60112	5.94872
249	ENSMUSG00000001666	Ddt	-0.567269	0.00634315	9.59625	9.58013	9.53163	10.312	10.0854	9.98711
250	ENSMUSG00000001672	Marveld3	2.17798	0.543441	4.18229	2	2	2.84054	2	2
251	ENSMUSG00000001674	Ddx18	0.348406	0.0714498	11.5131	11.754	11.6937	11.4652	11.3961	11.0296
252	ENSMUSG00000001687	Ubl3	-0.304392	0.245558	9.72891	9.65191	9.67241	10.1488	9.82535	9.97145
253	ENSMUSG00000001700	Gramd3	0.144173	0.695634	9.81757	9.90055	9.78524	9.76416	9.56622	9.73733
254	ENSMUSG00000001707	Eef1e1	-0.357917	0.291754	10.137	9.61826	10.0581	10.4369	10.3326	10.1515
255	ENSMUSG00000001729	Akt1	-0.349112	0.000560975	13.8378	13.7357	13.6925	14.1555	14.0661	14.0942
256	ENSMUSG00000001739	Cldn15	3.63874	0.236083	3.27232	5.17849	4.18782	2.84054	2.33223	2
257	ENSMUSG00000001741	Il16	-0.588127	0.852886	4.02393	2	4.36425	3.63625	4.90187	3.69639
258	ENSMUSG00000001750	Tcirg1	-1.13799	0.000836064	8.38492	7.52823	7.80282	8.87973	9.12991	9.2012
259	ENSMUSG00000001751	Naglu	-0.500326	0.193389	9.48855	8.89331	9.39859	9.80043	9.93322	9.58664
260	ENSMUSG00000001755	Coasy	-0.0166107	0.964542	10.3533	10.4938	10.3187	10.5065	10.6129	10.0413
261	ENSMUSG00000001761	Smo	1.10179	1.17916e-11	13.0958	12.7784	12.6814	11.7272	11.7892	11.7694
262	ENSMUSG00000001763	Tspan33	0.150909	0.78026	8.90571	8.56923	9.52931	9.12827	8.93911	8.60523
263	ENSMUSG00000001767	Crnkl1	0.82599	0.00012567	9.95833	10.3306	10.3841	9.47243	9.52218	9.2302
264	ENSMUSG00000001768	Rin2	-0.672793	0.0532982	8.95318	8.93419	8.55994	9.29251	9.48304	9.68417
265	ENSMUSG00000001773	Folh1	-1.8648	#N/A	2	2	2	2	2.60209	2
266	ENSMUSG00000001774	Chordc1	0.640863	6.84888e-05	10.6698	10.8022	10.6424	10.0126	10.1032	10.0856
267	ENSMUSG00000001783	Rtcb	0.174738	0.209168	12.7726	12.7178	12.8134	12.6286	12.5711	12.581
268	ENSMUSG00000001785	Pwp1	0.411995	0.029778	11.312	11.3947	11.4977	10.9098	11.108	10.9505
269	ENSMUSG00000001786	Fbxo7	-1.29037	0.000126949	7.88926	7.24227	7.99606	9.18686	8.8864	8.96574
270	ENSMUSG00000001794	Capns1	-0.352986	0.036525	13.3447	13.2223	13.4518	13.6281	13.7853	13.6685
271	ENSMUSG00000001802	Lrp3	0.621481	0.00129355	10.9228	10.731	11.049	10.0403	10.368	10.4225
272	ENSMUSG00000001819	Hoxd13	6.53616	0.152205	2.55761	5.77511	2	2	2	2
273	ENSMUSG00000001827	Folr1	-0.200149	0.945107	3.64305	4.22055	3.87465	5.15496	3.49196	2
274	ENSMUSG00000001829	Clpb	-0.3161	0.169595	11.3922	11.2968	11.3271	11.6389	11.732	11.5903
275	ENSMUSG00000001833	Septin7 ENSMUSG00000001833	0.776681	0.000799196	11.6311	12.1817	12.0969	10.9905	11.2891	11.3373
276	ENSMUSG00000001844	Zdhhc4	-0.724674	0.00116126	9.50551	9.42896	9.33646	10.0446	9.92863	10.4204
277	ENSMUSG00000001847	Rac1	-0.0120952	0.946907	13.3267	13.4335	13.3926	13.3639	13.3797	13.446
278	ENSMUSG00000001855	Nup214	-0.289426	0.031668	11.7092	11.6855	11.7349	11.9299	12.0731	11.9906
279	ENSMUSG00000001864	Aif1l	-0.00552173	0.986703	12.6384	12.4654	12.3366	12.5129	12.6225	12.322
280	ENSMUSG00000001870	Ltbp1	-0.277522	0.290508	11.7007	12.1446	11.5798	11.9767	12.2403	12.0912
281	ENSMUSG00000001891	Ugp2	0.0059816	0.988801	11.0263	11.4314	11.4876	11.2604	11.4344	11.2674
282	ENSMUSG00000001901	Kcnh6	-1.80538	0.449158	3.12405	2	4.85265	5.46149	4.99853	5.28015
283	ENSMUSG00000001909	Trmt1	-0.459267	0.0296935	11.3417	10.9891	11.1918	11.7169	11.6896	11.5044
284	ENSMUSG00000001910	Nacc1	-0.249194	0.0706852	13.4323	13.3504	13.3606	13.6798	13.5634	13.6465
285	ENSMUSG00000001911	Nfix	0.936697	0.689306	6.14975	5.39477	6.53767	5.74285	5.80198	2
286	ENSMUSG00000001918	Slc1a5	-1.09005	1.43964e-07	10.7714	10.3108	10.7366	11.6527	11.7107	11.7611
287	ENSMUSG00000001924	Uba1	-0.622366	3.22415e-06	14.7647	14.7619	14.7483	15.2915	15.4773	15.3669
288	ENSMUSG00000001930	Vwf	-4.66199	2.56202e-67	7.25832	6.49033	7.80282	11.853	12.1074	11.7131
289	ENSMUSG00000001942	Siae	-1.11855	0.00111974	8.27934	7.68016	8.4615	9.28278	9.34739	9.21819
290	ENSMUSG00000001943	Vsig2	-0.446868	0.89617	3.40676	4.67108	3.12789	5.06695	3.73579	3.31842
291	ENSMUSG00000001946	Esam	-3.16921	6.7252e-26	6.67442	7.74724	7.54342	10.6601	10.6736	10.2012
292	ENSMUSG00000001948	Spa17	-1.40272	0.185012	4.32498	4.22055	5.46934	5.82564	6.17722	6.12377
293	ENSMUSG00000001962	Fam50a	0.14311	0.638946	10.4382	10.3328	10.7456	10.4181	10.4333	10.2621
294	ENSMUSG00000001964	Emd	-0.286222	0.0458134	11.8732	11.6284	11.7279	12.0899	11.9848	12.0214
295	ENSMUSG00000001983	Taco1	-0.592625	0.128214	9.02549	8.57293	9.02795	9.67021	9.58774	9.12089
296	ENSMUSG00000001985	Grik3	0.749336	0.379113	7.36127	7.43364	5.89998	6.44772	6.17722	6.35199
297	ENSMUSG00000001986	Gria3	1.71486	0.000558761	6.48982	6.95503	7.31547	5.27767	5.29345	5.45411
298	ENSMUSG00000001988	Npas1	-0.979938	0.335872	5.13508	5.66838	5.61603	6.56481	6.57218	6.01688
299	ENSMUSG00000001995	Sipa1l2	-1.00507	8.3533e-11	12.0788	11.868	11.8939	12.9097	13.0441	12.9052
300	ENSMUSG00000001998	Ap4e1	0.527945	0.187717	8.62453	8.94851	8.35584	7.95765	8.22502	8.22785
301	ENSMUSG00000001999	Blvra	-1.05174	0.0259702	7.88351	7.63127	7.84061	9.09528	8.96924	8.298
302	ENSMUSG00000002006	Pdzd4	1.90487	4.46366e-16	9.70301	9.74676	9.73194	7.73301	7.87646	7.90713
303	ENSMUSG00000002007	Srpk3	-6.33267	9.09889e-08	5.28228	2	4.96643	10.7027	10.776	10.6434
304	ENSMUSG00000002010	Idh3g	-0.932664	1.78324e-10	11.6929	11.4706	11.8726	12.6178	12.562	12.6765
305	ENSMUSG00000002012	Pnck	-2.22726	0.000330515	5.09581	4.67108	5.65048	7.42317	7.36242	7.04961
306	ENSMUSG00000002014	Ssr4	-0.752293	0.00174229	11.0612	10.4471	10.3918	11.5894	11.5122	11.1072
307	ENSMUSG00000002015	Bcap31	-0.302273	0.182719	11.4816	11.4656	11.5871	11.7926	11.9391	11.7011
308	ENSMUSG00000002017	Fam98a	-0.127513	0.557885	11.0599	11.1705	11.2136	11.2585	11.3028	11.268
309	ENSMUSG00000002020	Ltbp2	-1.28639	0.620372	5.31684	2	3.87465	4.45436	5.85458	5.51822
310	ENSMUSG00000002028	Kmt2a	0.416035	0.079339	11.2508	11.5093	10.8484	10.8459	10.8922	10.6937
311	ENSMUSG00000002031	Ift46	0.192193	0.497461	10.7984	10.6492	10.7703	10.4641	10.5121	10.663
312	ENSMUSG00000002032	Tmem25	-0.391058	0.840392	5.59551	2	6.03651	5.92912	5.08912	5.80192
313	ENSMUSG00000002043	Trappc6a	-0.438747	0.124037	9.82959	9.78717	10.1255	10.4511	10.5594	10.0096
314	ENSMUSG00000002052	Supt6	0.27836	0.0830518	12.7914	12.8808	12.6954	12.3002	12.4901	12.7182
315	ENSMUSG00000002055	Spag5	0.336816	0.03479	11.3174	11.538	11.3851	11.1006	11.1073	11.0317
316	ENSMUSG00000002058	Unc119	-0.222262	0.494496	10.9839	10.973	10.6783	11.3347	11.2374	10.663
317	ENSMUSG00000002059	Rab34	1.02476	6.9582e-13	11.4939	11.3831	11.3317	10.4467	10.3916	10.3048
318	ENSMUSG00000002064	Sdf2	0.186863	0.62814	9.99081	10.1214	9.65342	9.9978	9.80377	9.38005
319	ENSMUSG00000002068	Ccne1	-0.838141	3.79714e-09	11.1069	10.9159	11.1518	11.9279	11.8488	11.9175
320	ENSMUSG00000002083	Bbc3	0.856337	0.00550275	9.01237	9.08961	9.24923	8.24014	8.23993	8.33407
321	ENSMUSG00000002100	Mybpc3	-4.01592	1.56677e-30	12.7465	12.1726	12.8931	16.6119	16.7601	16.5743
322	ENSMUSG00000002102	Psmc3	-0.48802	0.00842924	13.077	12.641	13.1191	13.4838	13.4967	13.3629
323	ENSMUSG00000002103	Acp2	-0.0580531	0.854288	10.243	10.0726	10.2174	10.0389	10.3624	10.2911
324	ENSMUSG00000002104	Rapsn	-5.53179	0.0948544	4.51559	2	2	8.31369	8.38556	7.87689
325	ENSMUSG00000002105	Slc39a13	-1.0404	3.11602e-06	9.22977	8.88439	8.99145	10.1528	10.0576	10.0193
326	ENSMUSG00000002107	Celf2	0.744107	0.00699961	10.6334	10.7791	10.4032	9.62662	9.9754	9.98569
327	ENSMUSG00000002108	Nr1h3	-0.0836059	0.930488	8.44084	6.50591	8.13029	7.71864	8.53807	7.47809
328	ENSMUSG00000002109	Ddb2	1.24053	0.140213	6.22448	7.40068	6.50038	5.82564	4.95101	5.92527
329	ENSMUSG00000002111	Spi1	-3.62356	0.0986575	4.02393	2	2.67147	5.23791	5.88017	6.5943
330	ENSMUSG00000002129	Sf3a1	-0.131175	0.433393	13.1009	13.1394	13.1288	13.2078	13.2939	13.2598
331	ENSMUSG00000002147	Stat6	-1.2474	2.12555e-10	9.43054	9.19429	9.28256	10.621	10.5233	10.497
332	ENSMUSG00000002190	Clgn	2.23409	0.575555	4.32498	2	3.62032	2	3.19836	2
333	ENSMUSG00000002205	Vrk3	-0.388137	0.0754067	10.1705	10.303	10.1163	10.5324	10.69	10.5294
334	ENSMUSG00000002210	Smg9	-0.701159	0.00175367	9.9706	9.79194	10.184	10.7512	10.7896	10.5128
335	ENSMUSG00000002221	Paxip1	0.0706325	0.805748	11.1229	11.2373	11.0213	11.2176	11.0005	10.9462
336	ENSMUSG00000002222	Rmnd5a	0.844389	2.21228e-05	11.2757	11.5165	11.2735	10.294	10.5485	10.6824
337	ENSMUSG00000002227	Mov10	1.12026	1.0555e-17	12.0032	11.9115	12.0693	10.7643	10.9364	10.9249
338	ENSMUSG00000002228	Ppm1j	-4.24358	9.99357e-05	6.14975	4.61471	5.84153	10.0023	9.68535	9.69808
339	ENSMUSG00000002233	Rhoc	-0.115747	0.578813	12.9999	12.9271	12.8384	13.2546	12.9813	12.8515
340	ENSMUSG00000002249	Tead3	0.823578	2.6449e-05	10.6864	10.4451	10.5393	9.65142	9.58968	9.95127
341	ENSMUSG00000002250	Ppard	-0.761971	0.00375271	9.72891	9.1203	9.82349	10.318	10.4696	10.2468
342	ENSMUSG00000002257	Def6	-2.00653	0.107512	6.1876	2	5.78062	7.49238	7.45049	7.11326
343	ENSMUSG00000002265	Peg3	1.51167	3.10733e-05	15.221	15.6376	15.1877	13.5211	13.9794	14.0068
344	ENSMUSG00000002266	Zim1	1.19911	6.30735e-05	11.165	11.5049	11.2272	9.81401	10.2004	10.2761
345	ENSMUSG00000002274	Metrn	0.872978	7.26724e-08	12.6057	12.3492	12.4467	11.6752	11.7939	11.2796
346	ENSMUSG00000002279	Lmf1	-1.0299	2.27374e-08	9.81153	9.6589	9.77942	10.8116	10.947	10.5468
347	ENSMUSG00000002280	Ciao3	-1.09751	8.7863e-07	9.82059	9.44522	9.78718	10.7765	10.8296	10.7557
348	ENSMUSG00000002289	Angptl4	1.27521	4.98794e-05	8.99113	8.84512	8.9471	7.5008	7.66448	7.82714
349	ENSMUSG00000002297	Dbf4	0.375198	0.115571	10.1503	10.5055	10.1618	9.98735	9.77847	9.95127
350	ENSMUSG00000002307	Daxx	0.0161918	0.958212	10.8554	10.8699	10.7154	10.8049	10.921	10.6604
351	ENSMUSG00000002308	Cd320	-0.334355	0.275902	10.3729	10.2263	9.96539	10.6544	10.6681	10.2314
352	ENSMUSG00000002319	Ipo4	-0.0538788	0.841076	11.4351	11.3376	11.5482	11.4701	11.4717	11.5463
353	ENSMUSG00000002320	Tm9sf1	-0.182505	0.326288	11.0354	11.1625	10.9003	11.2825	11.1934	11.1797
354	ENSMUSG00000002324	Rec8	-0.694367	0.40085	6.70083	6.25244	7.2829	7.85627	7.11539	7.36933
355	ENSMUSG00000002325	Irf9	-0.309082	0.665479	7.86611	7.9992	7.42899	8.23004	8.16901	7.83974
356	ENSMUSG00000002326	Gmpr2	-0.529511	0.272587	7.88926	8.37504	8.2133	8.31369	8.58553	9.08165
357	ENSMUSG00000002329	Mdp1	-0.359575	0.145017	10.1693	10.0084	10.2174	10.6113	10.5455	10.3036
358	ENSMUSG00000002332	Dhrs1	-0.712436	0.00628286	10.3207	9.63607	10.1737	10.7617	10.8677	10.7136
359	ENSMUSG00000002341	Ncan	1.70478	0.177559	5.53807	4.77761	5.26214	3.36817	4.12646	3.9026
360	ENSMUSG00000002342	Tmem161a	-1.15163	9.5105e-11	10.5649	10.6847	10.5845	11.8311	11.8701	11.5664
361	ENSMUSG00000002343	Armc6	-0.592963	0.0349521	10.2261	9.44724	10.0852	10.6657	10.669	10.2749
362	ENSMUSG00000002345	Borcs8	-0.10508	0.788692	9.30057	9.66931	9.35225	9.58167	9.56819	9.51382
363	ENSMUSG00000002346	Slc25a42	-1.31457	0.00331301	7.04809	7.34979	6.90891	8.34209	8.4973	8.36926
364	ENSMUSG00000002365	Snx9	0.0511043	0.873338	10.446	10.3737	10.4406	10.4886	10.4093	10.1951
365	ENSMUSG00000002372	Ranbp3	0.0371212	0.859176	12.6517	12.5422	12.5781	12.5805	12.668	12.402
366	ENSMUSG00000002379	Ndufa11	-0.819251	5.28763e-05	11.4715	11.3549	11.1815	12.238	12.2793	11.9374
367	ENSMUSG00000002384	Bmp8b	3.69903	0.227033	3.27232	5.72273	2	3.03864	2	2
368	ENSMUSG00000002393	Nr2f6	-0.365205	0.174654	11.7129	11.5735	11.5476	12.0627	12.2455	11.5357
369	ENSMUSG00000002395	Use1	-0.294611	0.382095	10.8693	10.1942	10.698	10.9897	11.1012	10.5848
370	ENSMUSG00000002396	Ocel1	-0.428778	0.352875	8.10735	7.98259	8.10567	8.44606	8.75075	8.22304
371	ENSMUSG00000002409	Dyrk1b	0.322798	0.181221	9.72408	9.93979	10.1347	9.55765	9.62228	9.67892
372	ENSMUSG00000002413	Braf	-0.262936	0.486045	9.46563	9.34049	9.08259	9.26558	9.52218	9.85215
373	ENSMUSG00000002416	Ndufb2	-0.951129	0.00628286	8.36854	7.90833	8.02261	9.28522	9.08107	8.74909
374	ENSMUSG00000002428	Hltf	0.370023	0.367387	8.56466	9.00717	9.01147	8.51836	8.2933	8.68769
375	ENSMUSG00000002455	Prpf6	0.19267	0.421713	11.6855	11.7686	11.9342	11.5217	11.4879	11.7922
376	ENSMUSG00000002458	Rgs19	0.0368086	0.906572	10.3719	10.2588	10.2317	10.4413	10.1617	10.1337
377	ENSMUSG00000002459	Rgs20	4.11502	#N/A	2.95878	2	4.27873	2.33751	2	2
378	ENSMUSG00000002475	Abhd3	0.938801	0.677263	4.92707	5.05684	4.52144	3.75367	4.28817	4.16538
379	ENSMUSG00000002477	Snrpd1	0.349732	0.110935	11.4297	11.4536	11.6534	11.3388	11.1342	11.0068
380	ENSMUSG00000002486	Tchp	0.361488	0.289249	9.2023	9.0714	9.19773	8.78291	8.60485	8.98572
381	ENSMUSG00000002489	Tiam1	-0.117576	0.718747	10.4712	10.5662	10.1648	10.6862	10.4632	10.4215
382	ENSMUSG00000002496	Tsc2	-0.222306	0.154984	12.147	12.0771	12.0174	12.2893	12.3744	12.2445
383	ENSMUSG00000002500	Rpl3l	-6.73386	0.00390672	2	2	2.37445	5.35403	5.95435	4.7499
384	ENSMUSG00000002504	Slc9a3r2	-0.585761	0.00596716	10.2829	9.85413	10.0757	10.7989	10.745	10.4257
385	ENSMUSG00000002524	Puf60	-0.251315	0.0708981	13.296	13.0377	13.1482	13.4273	13.4369	13.3826
386	ENSMUSG00000002546	Golga2	-0.312086	0.0408904	11.5321	11.4365	11.6993	11.8037	11.9707	11.8345
387	ENSMUSG00000002550	Uck1	0.0623482	0.836792	11.0315	10.9674	11.0254	11.0076	11.1248	10.6684
388	ENSMUSG00000002578	Ikzf4	0.51459	0.510226	8.10735	8.20411	7.69965	6.61223	7.44192	8.11317
389	ENSMUSG00000002580	Mien1	-1.09025	0.00143651	7.86611	7.77322	7.70786	8.73731	8.562	9.20364
390	ENSMUSG00000002588	Pon1	1.66467	#N/A	2	2	2.91765	2	2.33223	2
391	ENSMUSG00000002602	Axl	1.5742	1.44769e-32	12.7084	12.6737	12.5789	10.9671	11.189	11.0823
392	ENSMUSG00000002603	Tgfb1	-2.37636	1.9381e-31	9.19999	9.93116	9.76769	12.093	12.043	11.9679
393	ENSMUSG00000002608	Ccdc97	-0.306259	0.116749	11.1387	11.0554	11.0746	11.241	11.4333	11.5005
394	ENSMUSG00000002617	Zfp40	-0.556786	0.792998	5.41583	2	4.91066	5.65503	4.99853	4.63894
395	ENSMUSG00000002625	Akap8l	-0.70353	0.00115287	9.69317	9.62005	9.48466	10.272	10.3916	10.2409
396	ENSMUSG00000002633	Shh	0.963725	0.792146	2	2	2.37445	2	2	2
397	ENSMUSG00000002635	Pdcd2l	-0.606486	0.00833406	10.2009	9.90936	10.1498	10.7529	10.7828	10.543
398	ENSMUSG00000002658	Gtf2f1	0.485394	0.00233295	11.2613	11.2668	11.4366	10.8327	10.9493	10.7272
399	ENSMUSG00000002660	Clpp	-0.431305	0.00677066	11.1375	11.0083	11.0368	11.5269	11.4926	11.4577
400	ENSMUSG00000002661	Alkbh7	-0.884356	0.00640293	9.70952	8.85732	9.34174	10.3923	10.4224	9.77061
401	ENSMUSG00000002664	Pspn	0.609734	0.783538	6.00887	5.32622	4.66317	5.27767	4.43357	4.85294
402	ENSMUSG00000002668	Dennd1c	-0.377067	0.924865	3.93772	2	3.47409	3.50843	4.3627	2
403	ENSMUSG00000002679	Med6	0.38006	0.448963	9.63785	9.3274	9.77552	9.26558	9.35197	9.00262
404	ENSMUSG00000002688	Prkd1	-0.154166	0.685937	9.30057	8.89922	9.27981	9.28033	9.11111	9.54685
405	ENSMUSG00000002699	Lcp2	-3.62244	0.0642265	2.7721	2	3.47409	5.82564	5.40346	5.0823
406	ENSMUSG00000002718	Cse1l	0.521728	5.91436e-05	12.3937	12.5694	12.4485	11.9725	11.8508	12.0245
407	ENSMUSG00000002728	Naa20	-0.656317	0.00617371	10.0588	10.0581	9.88628	10.7635	10.5575	10.6452
408	ENSMUSG00000002731	Prkra	0.75649	5.37986e-05	10.3943	10.3469	10.5507	9.75538	9.70697	9.56972
409	ENSMUSG00000002732	Fkbp7	-0.540182	0.489491	7.17598	5.85027	7.47777	7.35047	7.45049	7.7085
410	ENSMUSG00000002733	Plekha3	-0.353846	0.425141	9.2919	9.18222	9.11379	9.51878	9.21535	9.84592
411	ENSMUSG00000002741	Ykt6	-0.11368	0.456569	12.6498	12.5256	12.6548	12.7691	12.7456	12.6577
412	ENSMUSG00000002748	Baz1b	0.949356	2.13756e-12	13.1791	13.4717	13.2348	12.2183	12.3881	12.4405
413	ENSMUSG00000002763	Pex6	0.104482	0.682647	11.8571	11.8838	11.8708	11.8477	11.9444	11.4633
414	ENSMUSG00000002767	Mrpl2	-0.513253	0.0170799	11.4459	11.1699	11.4702	12.0231	11.9569	11.633
415	ENSMUSG00000002768	Mea1	0.118671	0.73094	11.2418	10.896	11.1442	11.2629	11.0514	10.543
416	ENSMUSG00000002769	Gnmt	-1.90896	0.0511727	3.27232	4.36424	4.36425	5.82564	6.37022	4.16538
417	ENSMUSG00000002771	Grin2d	1.86693	0.0570568	5.85272	6.5666	6.08769	4.92396	4.95101	2.99708
418	ENSMUSG00000002778	Kdelr1	-0.510342	8.64767e-05	11.7964	11.9089	11.804	12.2762	12.3667	12.3961
419	ENSMUSG00000002781	Tmem143	-0.90675	0.000442655	9.21151	9.3959	9.20355	10.2346	10.3793	9.86608
420	ENSMUSG00000002797	Ggct	1.39571	0.102029	6.57796	7.83003	8.11803	6.56481	6.61854	5.42096
421	ENSMUSG00000002799	Jag2	-3.14688	1.67774e-32	7.31071	7.03238	7.6062	10.2447	10.7026	10.355
422	ENSMUSG00000002803	Btbd6	-0.511081	0.0597899	9.47139	9.39799	9.1919	9.78327	9.91011	9.90556
423	ENSMUSG00000002804	Nudt14	-0.04448	0.909852	9.65821	9.66064	9.56813	9.6092	9.89606	9.48603
424	ENSMUSG00000002808	Epdr1	-1.00033	0.000105989	8.63484	8.54304	8.56446	9.64383	9.45137	9.61989
425	ENSMUSG00000002812	Flii	-0.463895	0.000593408	12.6112	12.5163	12.606	12.9824	13.1617	12.9743
426	ENSMUSG00000002814	Top3a	0.331389	0.257662	10.377	10.1428	10.2682	10.0647	9.98132	9.74237
427	ENSMUSG00000002820	Atg4d	-1.20024	2.11318e-08	10.131	10.3415	10.3412	11.6355	11.6427	11.0656
428	ENSMUSG00000002825	Qtrt1	-0.201741	0.615553	9.91527	9.38119	9.84038	9.9647	9.87871	9.94982
429	ENSMUSG00000002831	Plin4	-1.14971	0.778063	3.12405	2	3.12789	2	2	4.63894
430	ENSMUSG00000002833	Hdgfl2	0.0889055	0.694788	12.3756	12.079	12.4347	12.2651	12.2501	12.1279
431	ENSMUSG00000002835	Chaf1a	0.55798	9.72149e-06	12.2734	12.1058	12.1606	11.6593	11.562	11.6497
432	ENSMUSG00000002844	Adprh	-0.527183	0.00202726	12.5233	12.3949	12.5055	13.0667	13.1249	12.7951
433	ENSMUSG00000002845	Tmem39a	0.552318	0.0054901	10.7375	10.8388	10.53	10.0185	10.1341	10.3048
434	ENSMUSG00000002846	Timmdc1	-0.912746	0.000254957	10.1237	10.0856	10.0059	11.1273	11.0251	10.7739
435	ENSMUSG00000002847	Pla1a	-6.89701	0.029447	2	2	2	3.63625	4.12646	5.63847
436	ENSMUSG00000002870	Mcm2	-0.257108	0.108193	13.8745	13.6731	13.7605	14.0284	14.0557	14.0017
437	ENSMUSG00000002871	Tpra1	-0.40263	0.2855	8.82995	9.29637	9.03448	9.51671	9.52015	9.35613
438	ENSMUSG00000002881	Nab1	-0.98522	0.00789765	8.85956	8.66255	8.88334	9.63429	9.40584	10.1938
439	ENSMUSG00000002885	Adgre5	-2.41968	1.63735e-12	6.89636	7.20458	7.05753	9.39998	9.56029	9.35832
440	ENSMUSG00000002897	Il17ra	-1.29031	0.00169201	7.01689	7.12609	7.18052	8.41074	8.27412	8.43301
441	ENSMUSG00000002900	Lamb1	-1.04459	1.82458e-16	12.6792	12.7756	12.6712	13.6624	13.9118	13.6727
442	ENSMUSG00000002908	Kcnn1	-1.37175	0.125913	6.24257	3.67646	6.82089	7.16154	6.968	7.86461
443	ENSMUSG00000002910	Arrdc2	-0.437645	0.487395	6.66103	6.55167	7.33679	7.23406	7.22932	7.47001
444	ENSMUSG00000002930	Ppp1r17	-5.58902	0.000338485	5.28228	2	4.59405	9.71795	9.6634	9.98001
445	ENSMUSG00000002944	Cd36	-1.72646	0.0192394	5.85272	7.20458	5.81139	7.7822	7.42463	8.80156
446	ENSMUSG00000002948	Map2k7	-0.40557	0.0480369	10.4538	10.2251	10.6752	10.9137	10.7116	10.9635
447	ENSMUSG00000002949	Timm44	-0.456676	0.0357679	10.4902	10.1328	10.5196	10.8401	10.6129	11.0528
448	ENSMUSG00000002957	Ap2a2	-0.0292242	0.876324	12.815	12.9883	12.806	12.8868	12.8587	12.9572
449	ENSMUSG00000002963	Pnkp	-0.529496	0.0515497	9.91668	9.89316	9.82349	10.4533	10.4926	10.2621
450	ENSMUSG00000002968	Med25	-0.0783154	0.718747	12.417	12.4812	12.264	12.4054	12.5724	12.4223
451	ENSMUSG00000002980	Bcam	-0.509735	0.00462868	13.2233	13.1475	12.8825	13.6353	13.8194	13.3028
452	ENSMUSG00000002981	Clptm1	-0.713768	8.90864e-09	12.5149	12.481	12.3686	13.1435	13.1972	13.1678
453	ENSMUSG00000002983	Relb	-1.25445	0.048588	6.91903	5.77511	7.00524	7.62157	7.83124	8.14905
454	ENSMUSG00000002984	Tomm40	-0.540693	8.99265e-05	12.4331	12.3387	12.3908	12.9975	12.9424	12.841
455	ENSMUSG00000002985	Apoe	-2.20376	3.73747e-32	10.967	11.4795	11.6496	13.6254	13.6543	13.5011
456	ENSMUSG00000002996	Hbp1	0.725482	0.00199169	10.2598	10.5084	10.3854	9.27543	9.7141	9.93081
457	ENSMUSG00000002997	Prkar2b	0.479013	0.0897976	9.2343	9.53528	9.89349	9.14718	9.20272	8.94548
458	ENSMUSG00000003031	Cdkn1b	0.499822	0.0259059	10.9193	11.0946	10.7426	10.417	10.336	10.5236
459	ENSMUSG00000003032	Klf4	-1.66733	0.0347039	6.47459	5.39477	5.95615	8.11406	7.6571	6.76255
460	ENSMUSG00000003033	Ap1m1	-0.398099	0.00315302	12.1422	11.9332	12.0318	12.5022	12.3898	12.4138
461	ENSMUSG00000003037	Rab8a	0.103393	0.596199	11.758	11.697	11.8338	11.7308	11.6404	11.6079
462	ENSMUSG00000003038	Hmgn2	0.357986	0.0758926	11.6195	11.4155	11.7459	11.3788	11.1998	11.1375
463	ENSMUSG00000003039	Fam32a	0.670447	0.000138421	11.0406	10.8372	11.2568	10.4303	10.3337	10.3918
464	ENSMUSG00000003051	Elf3	1.08148	0.422272	4.45481	7.22355	4.59405	5.62452	4.43357	4.80234
465	ENSMUSG00000003062	Stard3nl	0.0998239	0.746787	9.96516	9.7484	9.81403	9.76416	9.78018	9.69288
466	ENSMUSG00000003068	Stk11	-0.0250305	0.919272	12.4931	12.3145	12.377	12.4296	12.2784	12.5451
467	ENSMUSG00000003070	Efna2	1.72536	5.2413e-18	10.7407	10.8579	10.4996	8.89579	9.03339	9.03585
468	ENSMUSG00000003072	Atp5d	-1.19813	7.80359e-10	13.2986	13.1715	13.5244	14.62	14.6609	14.3035
469	ENSMUSG00000003099	Ppp5c	-0.804097	1.13246e-08	11.9185	11.7718	11.9333	12.75	12.691	12.5941
470	ENSMUSG00000003119	Cdk12	0.675499	0.000354081	10.9087	11.1157	10.8932	10.1884	10.4049	10.3059
471	ENSMUSG00000003123	Lipe	-0.194224	0.775716	6.93024	7.03238	7.83313	7.5175	7.67183	7.32521
472	ENSMUSG00000003131	Pafah1b2	0.0535972	0.792703	12.5489	12.3603	12.3978	12.4108	12.2681	12.4674
473	ENSMUSG00000003134	Tbc1d8	-1.58769	0.00178398	7.01689	6.78666	7.75612	8.75854	8.55008	9.06833
474	ENSMUSG00000003135	Cnot11	-0.0110048	0.976307	11.2926	10.9554	11.0888	11.1006	11.1046	11.1834
475	ENSMUSG00000003153	Slc2a3	0.704491	0.010281	13.9993	14.0741	12.8958	12.9311	13.1488	13.0404
476	ENSMUSG00000003154	Foxj2	-0.27477	0.497719	9.97736	9.19429	9.82915	9.87845	9.78526	10.2314
477	ENSMUSG00000003161	Sri	-0.39944	0.0251935	11.3174	11.0246	11.1815	11.725	11.5967	11.3945
478	ENSMUSG00000003166	Dgcr2	0.00870621	0.975853	11.8876	11.7097	11.8011	11.8172	11.6187	11.9253
479	ENSMUSG00000003184	Irf3	-0.238119	0.371017	10.3647	10.1378	10.6689	10.7316	10.7718	10.4004
480	ENSMUSG00000003190	Bcl2l12	0.0618476	0.886205	9.498	9.88871	9.80832	9.82579	9.74404	9.44126
481	ENSMUSG00000003198	Zfp959	0.72852	0.364581	6.24257	6.62484	6.31949	5.15496	5.80198	6.06059
482	ENSMUSG00000003199	Mpnd	0.14824	0.547617	12.2518	12.0832	12.2149	12.1523	12.0773	11.8664
483	ENSMUSG00000003200	Sh3gl1	0.36104	0.0135568	12.5476	12.5744	12.4728	12.1974	12.3199	11.9768
484	ENSMUSG00000003206	Ebi3	-1.45344	#N/A	3.12405	2	2	2	2.60209	3.9026
485	ENSMUSG00000003208	Yju2	-0.152468	0.712904	9.04882	8.88439	8.7467	8.97046	8.80855	9.32286
486	ENSMUSG00000003226	Ranbp2	0.796472	0.168894	11.1278	11.8971	11.4623	10.1819	10.8114	11.0736
487	ENSMUSG00000003228	Grk5	0.113533	0.834494	9.83556	10.5874	9.90602	10.0331	9.80711	10.2421
488	ENSMUSG00000003233	Dvl3	-0.435467	0.00391093	11.9764	11.8422	11.8939	12.232	12.2942	12.4827
489	ENSMUSG00000003234	Abcf3	-0.27934	0.245958	10.9451	10.9005	11.0927	11.2284	11.301	11.251
490	ENSMUSG00000003235	Eif2b5	-0.378834	0.046344	12.4822	12.1452	12.4031	12.8292	12.801	12.5398
491	ENSMUSG00000003269	Cyth2	-0.135726	0.535278	11.6125	11.2368	11.6146	11.6877	11.6864	11.5216
492	ENSMUSG00000003271	Sult2b1	1.22778	0.645861	4.68394	2	4.18782	3.36817	2.33223	3.58106
493	ENSMUSG00000003273	Car11	-0.319876	0.870351	5.41583	5.87447	5.30603	5.77098	5.66142	6.08196
494	ENSMUSG00000003282	Plag1	0.641013	0.317426	6.97422	7.18535	7.41903	6.15935	6.38817	7.04961
495	ENSMUSG00000003283	Hck	1.14092	0.618982	5.13508	4.72533	3.75308	3.63625	3.49196	4.08299
496	ENSMUSG00000003299	Mrpl4	-0.903254	6.89405e-08	11.2541	11.1723	11.2265	12.1557	12.1729	12.0276
497	ENSMUSG00000003308	Keap1	-0.037289	0.878112	11.3469	11.3694	11.2547	11.3896	11.4274	11.2639
498	ENSMUSG00000003309	Ap1m2	2.8318	0.035301	7.39401	6.37629	5.84153	4.38326	4.851	2
499	ENSMUSG00000003316	Glg1	0.111661	0.61271	13.0344	13.3227	12.8861	12.8874	13.1234	12.921
500	ENSMUSG00000003341	Atp8b3	0.178063	0.898136	6.44365	5.52282	4.96643	5.87831	6.07008	4.38758
501	ENSMUSG00000003344	Btbd2	-0.306461	0.11195	12.316	12.2046	12.2185	12.4978	12.7776	12.3523
502	ENSMUSG00000003345	Csnk1g2	0.304417	0.0245533	13.3476	13.0801	13.2669	13.0321	12.9325	12.8227
503	ENSMUSG00000003346	Abhd17a	-0.626604	0.00115611	12.1767	12.2126	12.2127	12.9227	13.0155	12.4903
504	ENSMUSG00000003348	Mob3a	-0.0948117	0.68495	11.7725	11.716	11.8575	11.8916	11.998	11.7314
505	ENSMUSG00000003352	Cacnb3	1.79885	2.08222e-16	11.5024	11.3763	11.413	9.66834	9.94994	9.19876
506	ENSMUSG00000003354	Ccdc65	-1.48359	0.452587	3.93772	2	2.91765	3.75367	3.94431	4.63894
507	ENSMUSG00000003355	Fkbp11	-0.463339	0.196312	7.92331	8.22309	8.48555	8.83047	8.62012	8.59412
508	ENSMUSG00000003360	Ddx23	-0.378018	0.00898749	12.1503	12.0741	12.4057	12.5259	12.595	12.6597
509	ENSMUSG00000003363	Pld3	-0.0866918	0.75271	10.6479	10.4093	10.5404	10.4533	10.7231	10.6763
510	ENSMUSG00000003378	Grik5	-0.0992759	0.748465	11.4098	10.8341	11.444	11.4663	11.4505	11.1196
511	ENSMUSG00000003379	Cd79a	0.723219	0.805079	3.93772	2	3.31135	3.50843	2.82934	2
512	ENSMUSG00000003380	Rabac1	-1.28057	3.9764e-10	10.6317	10.3141	10.7052	11.9924	11.9844	11.4805
513	ENSMUSG00000003382	Etv3	-0.415474	0.247347	10.104	9.28739	9.69734	10.108	10.1434	10.1926
514	ENSMUSG00000003402	Prkcsh	-0.0524902	0.812227	12.8567	12.8748	12.919	12.8954	13.032	12.876
515	ENSMUSG00000003410	Elavl3	-1.29117	0.777093	3.40676	2	3.47409	4.70819	3.94431	2
516	ENSMUSG00000003411	Rab3b	-1.1413	0.0458643	5.96595	7.31483	7.14471	7.54219	8.16381	8.28884
517	ENSMUSG00000003420	Fcgrt	-1.0483	0.209805	5.44738	4.49491	4.85265	6.04882	6.00176	5.74947
518	ENSMUSG00000003421	Nosip	-0.256914	0.19403	11.2077	10.9361	11.0634	11.3074	11.3715	11.3099
519	ENSMUSG00000003423	Pih1d1	-0.435379	0.0639467	11.2942	11.0972	11.4036	11.8678	11.8148	11.3865
520	ENSMUSG00000003429	Rps11	-0.0924464	0.709556	14.7741	14.5437	14.6161	14.878	14.7727	14.5513
521	ENSMUSG00000003435	Supt5	-0.0977619	0.617043	12.7585	12.7429	12.6659	12.7592	12.8407	12.8605
522	ENSMUSG00000003436	Dll3	2.9857	0.00863043	5.80482	7.8667	5.98344	3.75367	4.3627	4.38758
523	ENSMUSG00000003437	Paf1	-0.439265	0.010281	11.3066	11.1004	11.4274	11.6312	11.6783	11.8494
524	ENSMUSG00000003438	Timm50	-0.714929	0.000227671	12.2366	11.8468	12.203	12.9531	12.9263	12.5468
525	ENSMUSG00000003444	Med29	-0.409631	0.0751914	9.91104	9.87228	9.68908	10.3475	10.2926	10.0508
526	ENSMUSG00000003452	Bicd1	1.19508	0.0643811	7.12812	7.17564	6.72715	5.87831	6.38817	5.1241
527	ENSMUSG00000003458	Ncstn	-0.470518	0.0496227	11.4854	11.3135	11.5176	11.8896	12.0507	11.7812
528	ENSMUSG00000003464	Pex19	-0.272131	0.098905	12.5309	12.3471	12.4282	12.6863	12.6817	12.7586
529	ENSMUSG00000003469	Phyhip	-0.783044	0.75156	5.05544	2.31504	5.38999	5.19703	5.66142	5.38702
530	ENSMUSG00000003476	Crhr2	-4.8313	0.000131537	3.27232	2	3.98676	7.41428	7.13678	7.59418
531	ENSMUSG00000003500	Impdh1	-0.345298	0.0216118	11.867	11.6404	11.7779	12.187	12.0866	12.0521
532	ENSMUSG00000003518	Dusp3	-1.0457	4.88482e-13	10.1787	10.2461	10.2102	11.3247	11.2055	11.2326
533	ENSMUSG00000003526	Prodh	-0.622012	0.0182813	9.30918	9.23693	9.36008	9.91041	9.94691	9.90706
534	ENSMUSG00000003527	Ess2	-0.253296	0.193993	10.7776	10.8069	10.7585	10.8835	11.0848	11.1222
535	ENSMUSG00000003528	Slc25a1	0.544218	0.0675218	11.4346	11.2759	11.7429	11.1788	10.9425	10.7024
536	ENSMUSG00000003531	Dgcr6	0.153934	0.641246	10.9284	10.7847	10.8994	10.9434	10.7803	10.3746
537	ENSMUSG00000003534	Ddr1	-0.319572	0.0330394	13.6734	13.6014	13.6727	13.9992	14.0979	13.7936
538	ENSMUSG00000003541	Ier3	-1.09888	0.128757	6.54918	6.68082	7.07031	7.90151	7.99835	7.63812
539	ENSMUSG00000003545	Fosb	0.430843	0.848592	7.34461	3.43741	4.27873	5.52893	5.36772	5.87719
540	ENSMUSG00000003546	Klc4	-0.144446	0.765068	9.8954	9.37696	9.82538	9.91041	10.1617	9.41203
541	ENSMUSG00000003549	Ercc1	-0.557963	0.0617188	9.67663	9.06878	9.51536	10.1367	10.167	9.62899
542	ENSMUSG00000003555	Cyp17a1	-0.118251	0.98289	3.7481	2	3.31135	3.36817	3.84381	2
543	ENSMUSG00000003559	As3mt	-1.10405	1.54302e-07	8.96956	9.11269	9.21798	10.312	10.2029	10.0803
544	ENSMUSG00000003573	Homer3	0.574784	0.00363357	11.3474	10.8464	11.2975	10.52	10.7546	10.5343
545	ENSMUSG00000003575	Crtc1	0.103193	0.733498	10.8249	10.3705	10.7585	10.6123	10.724	10.3195
546	ENSMUSG00000003581	Rnf215	0.152461	0.748798	9.27002	8.89034	9.08889	9.11736	9.1057	8.52169
547	ENSMUSG00000003585	Sec14l2	0.565204	0.494644	6.47459	5.58282	7.56163	6.51579	6.15642	5.92527
548	ENSMUSG00000003604	Aven	-0.387421	0.12943	9.78862	9.73193	9.92198	10.2053	10.2105	10.1902
549	ENSMUSG00000003623	Crot	0.424213	0.257552	9.14092	9.64313	9.29894	9.20244	9.09207	8.46995
550	ENSMUSG00000003644	Rps6ka1	-0.586829	0.000579932	11.6562	11.5141	11.6755	12.2164	12.24	12.1518
551	ENSMUSG00000003657	Calb2	-1.02161	0.86668	3.40676	2	2	2.33751	4.03826	2
552	ENSMUSG00000003660	Snrnp200	0.257338	0.0816679	13.7408	13.6921	13.6147	13.2904	13.5545	13.4219
553	ENSMUSG00000003662	Ciao1	-0.255278	0.340262	10.272	10.4072	10.4985	10.6657	10.6177	10.6657
554	ENSMUSG00000003680	Taf6l	-0.365042	0.157613	9.88536	9.61647	9.75982	10.0732	10.1965	10.0922
555	ENSMUSG00000003721	Insig2	0.18435	0.643368	9.23656	8.97394	9.06992	8.72658	9.05322	8.94548
556	ENSMUSG00000003731	Kpna6	-0.706685	7.8422e-07	11.2077	11.2126	11.0401	11.9063	11.9618	11.7045
557	ENSMUSG00000003746	Man1a	0.494164	0.0307714	10.7953	10.7982	10.4626	10.0675	10.0826	10.4246
558	ENSMUSG00000003752	Itpkc	0.827583	0.0172638	8.82695	9.33832	9.1919	8.45908	8.51375	7.89511
559	ENSMUSG00000003762	Coq8b	-0.20101	0.627694	9.11169	8.89034	9.00815	9.19207	9.18743	9.23736
560	ENSMUSG00000003778	Brd8	0.225214	0.275224	11.07	11.1869	11.1252	10.6704	10.9932	11.0207
561	ENSMUSG00000003779	Kif20a	0.100023	0.593525	12.4205	12.5187	12.3058	12.3857	12.4064	12.1474
562	ENSMUSG00000003808	Farsa	-0.139108	0.538142	12.1359	12.0367	12.2841	12.3038	12.4458	12.1157
563	ENSMUSG00000003809	Gcdh	-0.549269	0.0122972	9.81455	9.59477	9.7618	10.2434	10.2441	10.3318
564	ENSMUSG00000003810	Mast2	0.297596	0.145482	12.1084	12.1772	11.9144	11.6991	11.6272	11.9714
565	ENSMUSG00000003812	Dnase2a	0.757567	0.624176	5.82897	2.98272	6.46209	5.15496	5.69065	2.99708
566	ENSMUSG00000003813	Rad23a	-0.738178	0.000348155	10.6723	10.5956	10.6132	11.4127	11.2789	11.3972
567	ENSMUSG00000003814	Calr	-0.25398	0.0553629	15.385	15.4445	15.3454	15.6229	15.6789	15.6362
568	ENSMUSG00000003824	Syce2	0.174847	0.745739	8.54657	8.46945	8.44196	8.78636	7.96285	8.04408
569	ENSMUSG00000003847	Nfat5	-0.281438	0.60849	9.57855	9.3959	9.26321	9.32133	9.52015	10.1273
570	ENSMUSG00000003848	Nob1	0.0585346	0.864384	11.1211	11.1564	11.1525	11.1442	10.9546	11.1477
571	ENSMUSG00000003849	Nqo1	1.81955	0.13005	5.85272	6.76092	6.20824	5.02085	5.33106	2
572	ENSMUSG00000003863	Ppfia3	-0.322814	0.630986	6.59214	6.28893	6.85083	7.05119	6.99168	6.63824
573	ENSMUSG00000003865	Gys1	-1.82823	9.46624e-37	11.6281	11.5237	11.7319	13.4056	13.6022	13.3514
574	ENSMUSG00000003868	Ruvbl2	0.125529	0.577427	12.8675	12.6637	12.9381	12.7458	12.7456	12.6112
575	ENSMUSG00000003872	Lin7b	-3.001	0.193346	3.64305	2	2.91765	5.02085	5.40346	5.0823
576	ENSMUSG00000003873	Bax	-0.626247	0.0047711	11.4008	10.601	11.2893	11.7749	11.7985	11.7144
577	ENSMUSG00000003923	Tfam	0.631794	0.00369384	10.7287	10.8202	10.9313	10.2879	9.78187	10.4464
578	ENSMUSG00000003929	Zfp81	0.809551	0.138375	7.76959	8.47342	7.84805	6.78768	7.26862	7.63812
579	ENSMUSG00000003934	Efnb3	-0.720376	2.13824e-05	12.1271	12.3717	11.8478	12.9435	12.8056	12.8005
580	ENSMUSG00000003948	Mmd	-1.49935	1.70274e-32	10.7823	10.9744	10.94	12.4088	12.369	12.4173
581	ENSMUSG00000003949	Hlf	1.35913	0.0460124	5.6234	6.86124	6.92307	4.64879	5.08912	5.90143
582	ENSMUSG00000003955	Fam162a	-0.0456632	0.870963	11.8184	11.997	11.987	12.1903	12.0241	11.6872
583	ENSMUSG00000003970	Rpl8	-0.0712159	0.805855	16.0163	15.7248	16.0117	16.1245	16.1067	15.7191
584	ENSMUSG00000003992	Ssbp2	0.121833	0.629115	10.5987	10.4166	10.698	10.4641	10.4988	10.3972
585	ENSMUSG00000004018	Fancl	0.413341	0.37916	7.9007	8.08469	8.83548	7.98192	7.96285	7.8208
586	ENSMUSG00000004031	Brinp2	-0.776896	0.834924	2	3.97401	3.62032	2	3.73579	4.85294
587	ENSMUSG00000004032	Gstm5	-0.373387	0.0783712	10.5015	10.602	10.6804	10.9457	11.01	10.9498
588	ENSMUSG00000004035	Gstm7	-0.445388	0.316805	7.34461	7.33241	7.67476	7.77528	8.02154	7.87689
589	ENSMUSG00000004038	Gstm3	5.23401	0.0555736	3.27232	4.29419	2	2	2	2
590	ENSMUSG00000004040	Stat3	-1.22497	9.05238e-07	9.87379	10.0084	10.0946	11.1415	11.2337	11.2714
591	ENSMUSG00000004043	Stat5a	-0.939892	0.0805774	7.59046	8.04791	7.57066	8.63006	8.92381	8.44954
592	ENSMUSG00000004044	Cavin1	-4.10867	9.78824e-135	9.64467	10.0382	9.347	13.9405	13.7	13.7727
593	ENSMUSG00000004054	Map3k11	-0.64264	0.000274198	11.747	11.5758	11.7399	12.3158	12.4757	12.1892
594	ENSMUSG00000004056	Akt2	-0.0966791	0.732992	13.5659	13.2831	13.4252	13.5451	13.6396	13.3815
595	ENSMUSG00000004069	Dnaja3	-0.460261	0.020618	10.6954	11.0179	10.7062	11.3794	11.2583	11.1772
596	ENSMUSG00000004070	Hmox2	-0.431192	0.0324321	10.509	10.6856	10.6604	11.0846	11.0807	10.9843
597	ENSMUSG00000004071	Cdip1	-0.92379	1.33739e-11	11.836	11.7585	11.8496	12.7205	12.6975	12.7948
598	ENSMUSG00000004085	Map3k20	-3.36401	2.80449e-40	7.99977	7.50515	7.62365	10.8875	10.7896	11.4329
599	ENSMUSG00000004096	Cwc15	-0.0255863	0.942894	10.4074	10.481	10.7082	10.6639	10.5152	10.5049
600	ENSMUSG00000004098	Col5a3	1.28816	0.583944	4.32498	2	5.17014	3.63625	3.35262	3.16668
601	ENSMUSG00000004099	Dnmt1	-0.127862	0.481786	13.749	13.724	13.6912	13.7154	13.9795	13.8413
602	ENSMUSG00000004100	Ppan	-0.0429596	0.893243	11.741	11.5127	11.8694	11.767	11.9103	11.5772
603	ENSMUSG00000004105	Angptl2	-1.09612	1.75353e-11	10.2862	10.3968	10.2374	11.288	11.2903	11.6047
604	ENSMUSG00000004110	Cacna1e	-0.981515	0.437921	4.88161	6.09653	3.98676	6.07162	6.64864	5.51822
605	ENSMUSG00000004113	Cacna1b	-0.34521	0.834746	5.72984	6.32451	5.81139	5.42655	5.82852	7.10284
606	ENSMUSG00000004127	Trmt10a	0.256131	0.614519	8.74047	8.89627	8.63499	8.41074	8.49316	8.61259
607	ENSMUSG00000004151	Etv1	-2.95914	0.00122651	5.75527	2	5.98344	7.9939	8.22502	8.25632
608	ENSMUSG00000004187	Kifc2	-1.53854	0.00168311	7.57626	6.17659	7.3047	8.61463	8.39447	8.88294
609	ENSMUSG00000004207	Psap	-0.494826	6.00956e-05	13.591	13.6781	13.7875	14.1248	14.3057	14.1083
610	ENSMUSG00000004221	Ikbkg	-0.168663	0.469531	10.3292	10.3544	10.3293	10.3428	10.5985	10.5631
611	ENSMUSG00000004231	Pax2	2.27842	0.506583	5.21055	2	4.96643	2	4.03826	2
612	ENSMUSG00000004233	Wars2	-0.322432	0.432068	8.36028	8.23716	8.43209	8.80689	8.8152	8.31615
613	ENSMUSG00000004263	Atn1	0.238159	0.598939	9.15293	9.08703	9.3285	8.61463	8.91764	9.26331
614	ENSMUSG00000004264	Phb2	-0.575208	6.44647e-05	13.5382	13.3262	13.4292	14.0586	14.047	13.9167
615	ENSMUSG00000004266	Ptpn6	-0.26651	0.765547	6.1876	7.52823	7.24957	7.59821	7.19913	7.22312
616	ENSMUSG00000004267	Eno2	-1.70463	0.0258306	6.50489	5.61191	7.8991	8.88296	8.51375	8.51777
617	ENSMUSG00000004268	Emg1	0.185091	0.391729	11.6473	11.6342	11.7716	11.6308	11.6034	11.2355
618	ENSMUSG00000004270	Lpcat3	-0.356727	0.179121	10.4224	10.7102	10.5126	10.905	10.8435	10.9764
619	ENSMUSG00000004285	Atp6v1f	-0.30315	0.235366	11.0224	10.6501	11.0205	11.3811	11.1998	11.029
620	ENSMUSG00000004317	Clcn5	-0.410853	0.0751522	11.8143	12.1292	11.5205	12.0993	12.2437	12.4014
621	ENSMUSG00000004319	Clcn3	0.85847	0.000155521	10.702	10.9019	10.8796	9.92613	9.85308	10.1299
622	ENSMUSG00000004328	Hif3a	-0.996625	2.34886e-05	9.76847	9.86927	10.1255	10.8835	10.9102	10.9714
623	ENSMUSG00000004347	Pde1c	-2.00284	0.159028	3.84602	4.82807	4.79222	6.33919	6.69265	5.94872
624	ENSMUSG00000004356	Utp20	0.41459	0.0267177	11.8124	12.1625	11.9002	11.2777	11.681	11.6626
625	ENSMUSG00000004360	9330159F19Rik	6.62422	0.0148564	3.40676	5.29068	4.18782	2	2	2
626	ENSMUSG00000004364	Cul3	0.527331	0.0412834	10.934	11.3973	11.3502	10.5013	10.6828	10.9293
627	ENSMUSG00000004371	Il11	1.99859	#N/A	3.7481	2	4.27873	2	3.35262	2
628	ENSMUSG00000004383	Large1	1.11253	1.55644e-07	11.6221	11.3179	11.3781	10.1897	10.2466	10.5439
629	ENSMUSG00000004393	Ddx56	-0.323126	0.132977	11.8648	11.8306	11.9874	12.2657	12.3545	12.0144
630	ENSMUSG00000004394	Tmed4	-0.376964	0.0551695	10.6597	10.8341	10.9066	11.0831	11.0507	11.3816
631	ENSMUSG00000004415	Col26a1	-1.44062	6.16066e-11	10.1358	9.84191	9.83665	11.4054	11.5684	11.1414
632	ENSMUSG00000004446	Bid	-0.524727	0.32334	8.4603	7.24227	8.25308	8.70122	8.3766	8.6772
633	ENSMUSG00000004451	Ralb	0.232805	0.377853	12.2099	11.9663	12.1931	12.0698	11.6239	11.9542
634	ENSMUSG00000004455	Ppp1cc	-0.0741661	0.781282	12.8384	12.5304	12.5143	12.8553	12.6794	12.5812
635	ENSMUSG00000004460	Dnajb11	-0.76837	5.9358e-09	11.3774	11.3683	11.3755	12.1746	12.0165	12.2245
636	ENSMUSG00000004462	Tbccd1	0.351358	0.227178	9.22295	9.52576	9.25763	8.97651	9.18486	8.79186
637	ENSMUSG00000004473	Clec11a	0.454453	0.753718	5.944	5.25425	5.12185	4.52213	5.69065	4.7499
638	ENSMUSG00000004500	Zfp324	0.0538271	0.90422	9.1743	9.49095	9.42122	9.27789	9.50789	9.13374
639	ENSMUSG00000004508	Gab2	-0.713269	0.0111637	8.83294	8.99065	8.92616	9.58365	9.30785	9.92195
640	ENSMUSG00000004530	Coro1c	0.0312113	0.876517	13.7368	13.6767	13.6472	13.6986	13.6684	13.6
641	ENSMUSG00000004535	Tax1bp1	0.634581	0.0617692	10.1261	10.8518	10.7839	9.88811	10.1126	9.95851
642	ENSMUSG00000004552	Ctse	1.11423	0.265956	6.37969	6.28893	5.17014	5.5615	4.62741	4.69549
643	ENSMUSG00000004558	Ndrg2	-3.05093	1.59043e-66	8.68862	8.85123	9.06673	11.7486	11.8653	12.1095
644	ENSMUSG00000004561	Mettl17	-0.784241	0.0031431	9.37627	9.32301	9.36268	10.2091	10.3983	9.71356
645	ENSMUSG00000004562	Arhgef40	1.21603	2.16456e-15	12.3643	12.4839	12.3102	11.0577	11.2589	11.1963
646	ENSMUSG00000004565	Pnpla6	-0.168478	0.54957	10.4788	10.5333	10.5277	10.5878	10.8164	10.6299
647	ENSMUSG00000004567	Mcoln1	-0.793972	0.000383541	9.7385	9.34049	9.56588	10.3084	10.3759	10.3594
648	ENSMUSG00000004568	Arhgef18	0.127121	0.636514	10.5881	10.4268	10.465	10.294	10.3057	10.496
649	ENSMUSG00000004591	Pkn2	0.584501	0.00296811	11.1579	11.2787	11.1442	10.4159	10.7709	10.6262
650	ENSMUSG00000004610	Etfb	-1.37692	6.89405e-08	9.35978	8.99893	9.37045	10.6563	10.6224	10.5922
651	ENSMUSG00000004626	Stxbp2	-0.131764	0.709684	10.9772	10.6395	11.1896	11.1205	11.1067	11.0234
652	ENSMUSG00000004631	Sgce	0.668731	0.00158811	10.3111	10.6182	10.4195	9.72695	9.86114	9.77553
653	ENSMUSG00000004633	Chn2	0.837804	0.286982	6.8499	7.62415	6.93709	6.43019	6.45783	6.22328
654	ENSMUSG00000004637	Wwox	-0.814172	0.046567	7.67283	7.30596	7.31547	8.07511	8.20996	8.42048
655	ENSMUSG00000004642	Slbp	0.933158	1.89051e-07	11.1125	11.3963	11.3063	10.3718	10.3521	10.3116
656	ENSMUSG00000004655	Aqp1	-3.52042	2.51053e-21	5.47825	5.87447	6.27601	9.58365	9.12724	9.26097
657	ENSMUSG00000004661	Arid3b	-0.778428	1.57608e-05	11.9325	11.8275	11.7963	12.5502	12.5687	12.7646
658	ENSMUSG00000004665	Cnn2	-0.859224	1.85386e-12	13.5895	13.702	13.4214	14.4335	14.4731	14.3963
659	ENSMUSG00000004667	Polr2e	-0.0344545	0.906572	12.5318	12.2501	12.4303	12.5663	12.5533	12.1772
660	ENSMUSG00000004677	Myo9b	0.543131	0.000484951	12.4055	12.2117	12.3586	11.787	11.8173	11.7499
661	ENSMUSG00000004698	Hdac9	-2.21345	1.17109e-05	6.24257	5.52282	6.6945	8.25016	8.15859	8.67369
662	ENSMUSG00000004748	Mtfp1	-1.14939	2.88589e-05	9.14092	8.54304	9.16534	10.2181	10.2255	9.8905
663	ENSMUSG00000004768	Rab23	0.825638	0.00356201	9.537	9.76468	9.39097	8.4677	8.87053	8.88294
664	ENSMUSG00000004771	Rab11a	-0.630052	0.000247246	10.7093	10.8601	10.8099	11.3941	11.1998	11.6416
665	ENSMUSG00000004788	Eif2b2	-0.529277	0.00795965	11.0995	10.987	11.2797	11.5524	11.7121	11.6963
666	ENSMUSG00000004789	Dlst	-1.37345	1.51239e-37	12.5775	12.5763	12.5128	13.9127	13.9103	13.9627
667	ENSMUSG00000004791	Pgf	1.21769	0.000105807	9.16958	9.37484	8.78597	7.7891	8.16381	7.79515
668	ENSMUSG00000004798	Ulk2	0.703035	0.0207365	10.1538	10.4909	9.77161	9.39095	9.47886	9.53334
669	ENSMUSG00000004815	Dgkq	0.227793	0.684168	8.42904	8.56552	8.44196	8.37911	8.30752	8.06032
670	ENSMUSG00000004837	Grap	-2.20253	0.000152117	5.59551	7.62415	5.50743	8.87001	8.75421	8.64166
671	ENSMUSG00000004843	Chmp2b	0.271711	0.36711	9.42065	9.42896	9.40365	9.08412	9.06721	9.2819
672	ENSMUSG00000004846	Plod3	-0.654985	0.00016346	11.6469	11.5974	11.8772	12.2975	12.4223	12.377
673	ENSMUSG00000004849	Ap1s1	-0.462762	0.00627118	11.7725	11.7906	11.5652	12.2993	12.1326	12.0859
674	ENSMUSG00000004864	Mapk13	2.1586	0.000126719	7.16654	7.27901	5.46934	5.02085	5.13237	4.24331
675	ENSMUSG00000004865	Srpk1	0.242992	0.128757	11.5399	11.5772	11.5686	11.3169	11.3069	11.334
676	ENSMUSG00000004872	Pax3	6.48449	0.0226145	5.21055	2	4.44499	2	2	2
677	ENSMUSG00000004880	Lbr	-0.0444007	0.870496	11.3677	11.3831	11.2428	11.2715	11.2801	11.5602
678	ENSMUSG00000004885	Crabp2	2.68324	1.42554e-13	11.0093	10.5333	11.0872	7.70412	9.01329	7.45371
679	ENSMUSG00000004891	Nes	-0.161467	0.42146	12.0174	11.9579	12.2217	12.0684	12.4538	12.142
680	ENSMUSG00000004895	Prcc	-0.186192	0.251123	11.8368	11.7372	11.9342	12.0691	12.0216	11.9804
681	ENSMUSG00000004896	Rrnad1	-0.208652	0.729624	8.84187	8.7104	8.56446	8.87973	8.88324	8.98572
682	ENSMUSG00000004897	Hdgf	0.2834	0.0258117	14.222	14.1309	14.1561	13.9287	13.8558	13.8752
683	ENSMUSG00000004902	Slc25a18	0.309117	0.962543	2	2	4.96643	4.52213	2	2.80485
684	ENSMUSG00000004929	Thop1	-0.176578	0.524165	12.8308	12.4206	12.6701	12.9596	12.9488	12.5321
685	ENSMUSG00000004931	Apba3	-0.286587	0.168393	10.7142	10.9325	10.7829	11.2813	11.1181	10.8676
686	ENSMUSG00000004933	Matk	0.0784047	0.951821	6.13045	5.05684	7.14471	5.52893	6.57218	6.5022
687	ENSMUSG00000004934	Pias4	-0.203632	0.285834	11.4198	11.3239	11.371	11.6322	11.5501	11.5425
688	ENSMUSG00000004936	Map2k1	-0.16372	0.389006	12.0525	11.9779	12.0492	12.3176	12.0352	12.2048
689	ENSMUSG00000004937	Sgta	-0.108342	0.542183	12.7414	12.6859	12.746	12.8351	12.8245	12.8392
690	ENSMUSG00000004939	Nmrk2	-8.07141	0.000216991	2	2	2	6.22182	5.4724	5.51822
691	ENSMUSG00000004945	Tmem242	-0.264733	0.129188	11.2111	11.2928	11.0433	11.5468	11.3022	11.492
692	ENSMUSG00000004947	Dtx2	0.0411284	0.890038	11.0914	11.1093	10.9066	11.012	11.0222	10.9585
693	ENSMUSG00000004951	Hspb1	-6.29277	3.20249e-173	8.61761	8.09503	9.05392	14.8671	15.048	14.8268
694	ENSMUSG00000004952	Rasa4	1.81404	0.311727	5.53807	4.55605	5.07188	3.96321	4.20958	2
695	ENSMUSG00000004961	Syt5	-0.451552	0.79226	4.10528	2.79256	4.09079	3.36817	4.20958	4.51873
696	ENSMUSG00000004980	Hnrnpa2b1	0.608434	1.04874e-05	14.6127	15.0675	15.0454	14.2341	14.3617	14.3453
697	ENSMUSG00000004988	Fxyd4	0.212087	0.966533	3.64305	2	3.47409	2	4.12646	2
698	ENSMUSG00000004994	Ccdc130	-0.779145	0.0590446	7.83663	7.34113	8.07428	8.53485	8.47647	8.63083
699	ENSMUSG00000004996	Mri1	-0.281257	0.335804	9.89254	9.63607	9.98239	10.2572	10.1247	9.97716
700	ENSMUSG00000005034	Prkacb	-0.0200708	0.95411	10.9806	11.4405	10.9939	11.1192	11.1448	11.2568
701	ENSMUSG00000005043	Sgsh	-0.146008	0.728041	9.19303	8.95987	9.16534	9.23562	9.49759	8.98572
702	ENSMUSG00000005045	Chd5	2.55128	0.421227	4.68394	3.15072	5.02012	3.03864	3.19836	2
703	ENSMUSG00000005054	Cstb	0.392349	0.241547	9.85186	10.1882	10.3187	9.82747	9.76136	9.62899
704	ENSMUSG00000005057	Sh2b2	1.05467	0.0385588	7.76959	7.40068	7.73219	6.37628	7.26862	5.85253
705	ENSMUSG00000005069	Pex5	0.579317	0.0035909	11.1489	11.356	11.036	10.6143	10.6782	10.5294
706	ENSMUSG00000005078	Jkamp	0.174821	0.654482	9.15771	9.59113	9.39859	9.32371	9.11381	9.21336
707	ENSMUSG00000005087	Cd44	-1.70747	2.09299e-13	9.04882	8.91389	8.99816	10.5314	10.7554	10.764
708	ENSMUSG00000005089	Slc1a2	1.77396	0.0149661	6.41202	6.81195	7.26077	4.58685	5.13237	5.69504
709	ENSMUSG00000005102	Eif2ak4	0.628582	0.0106302	9.87959	10.2577	10.0693	9.52292	9.29125	9.52751
710	ENSMUSG00000005103	Wdr1	-0.388809	0.00305175	13.1161	13.3907	13.1771	13.6225	13.5431	13.6949
711	ENSMUSG00000005107	Slc2a9	-3.36361	0.163272	2.95878	2	2.67147	5.39075	3.84381	4.24331
712	ENSMUSG00000005124	Ccn4	-0.471995	0.352932	8.41315	8.84206	8.17239	8.51836	9.04192	9.25628
713	ENSMUSG00000005125	Ndrg1	0.856104	0.0332798	8.64167	9.42896	9.77747	7.7543	8.74728	8.79833
714	ENSMUSG00000005142	Man2b1	-0.873389	2.02589e-06	9.83854	9.92538	10.042	10.7199	10.9598	10.7314
715	ENSMUSG00000005148	Klf5	-0.447974	0.835545	5.31684	4.77761	4.59405	5.59335	5.36772	4.9491
716	ENSMUSG00000005150	Wdr83	-0.323487	0.285758	9.49234	9.77918	9.43364	9.82747	10.025	9.83495
717	ENSMUSG00000005161	Prdx2	0.0391317	0.899586	14.4371	14.2204	14.6446	14.4829	14.4725	14.2484
718	ENSMUSG00000005198	Polr2a	0.217842	0.169522	13.8564	13.9407	13.772	13.5196	13.7172	13.6766
719	ENSMUSG00000005202	Shbg	4.44145	0.0122306	2.55761	5.64042	4.59405	2.84054	2	2
720	ENSMUSG00000005204	Senp3	-0.316784	0.016193	12.5609	12.4531	12.3399	12.8149	12.7128	12.7831
721	ENSMUSG00000005220	Corin	2.02406	3.12616e-26	11.2872	11.4471	11.154	9.15253	9.59549	9.04404
722	ENSMUSG00000005225	Plekha8	0.713503	0.00605908	11.1632	10.9108	10.7164	10.2194	10.1394	10.3262
723	ENSMUSG00000005233	Spc25	0.170127	0.639095	9.69481	9.60927	9.95509	9.47671	9.41681	9.84123
724	ENSMUSG00000005237	Dnah2	-1.1812	0.380752	5.98757	2.31504	6.16122	6.61223	7.01498	6.22328
725	ENSMUSG00000005251	Ripk4	-1.28878	0.000508414	6.96335	7.17564	6.90891	8.62237	8.31223	7.80161
726	ENSMUSG00000005262	Ufd1	-0.0707027	0.839268	10.1538	9.90643	10.4319	10.3132	10.233	10.2012
727	ENSMUSG00000005267	Zfp287	0.165999	0.857513	6.93024	7.18535	6.6945	7.08519	6.84341	6.35199
728	ENSMUSG00000005268	Prlr	-0.568929	0.906158	2	4.82807	2	3.36817	2.33223	5.03925
729	ENSMUSG00000005299	Letm1	-0.818516	3.64005e-09	11.0795	10.8085	10.9366	11.8219	11.7808	11.6833
730	ENSMUSG00000005312	Ubqln1	0.199085	0.154648	12.7562	12.9112	12.6943	12.5615	12.636	12.5754
731	ENSMUSG00000005320	Fgfr4	2.40079	0.00025037	4.68394	7.34113	6.50038	4.87297	3.35262	4.51873
732	ENSMUSG00000005338	Cadm3	0.38287	0.408459	9.41866	8.99342	8.91202	8.65669	8.90211	8.66663
733	ENSMUSG00000005354	Txn2	-0.679073	1.3238e-05	12.147	12.0387	12.2124	12.9493	12.8697	12.5969
734	ENSMUSG00000005357	Slc1a6	3.0038	0.0028721	7.54744	7.94308	7.46815	4.52213	4.62741	5.28015
735	ENSMUSG00000005360	Slc1a3	1.00901	8.85143e-07	11.1483	11.3879	11.1697	10.0942	10.3475	10.2456
736	ENSMUSG00000005362	Crbn	0.775947	0.0277549	8.93103	9.15531	9.18604	8.30409	8.68328	7.88299
737	ENSMUSG00000005370	Msh6	1.11668	3.01754e-20	12.3255	12.585	12.4797	11.2989	11.4044	11.3501
738	ENSMUSG00000005371	Fbxo11	0.71815	0.00206177	10.3523	10.6949	10.6316	9.67765	10.0562	9.79346
739	ENSMUSG00000005373	Mlxipl	-2.16121	0.505331	2	2	3.87465	5.11163	4.3627	2
740	ENSMUSG00000005374	Tbl2	-0.154978	0.476433	11.0432	11.2934	10.9939	11.2592	11.2263	11.3262
741	ENSMUSG00000005378	Bud23	-0.0580929	0.856805	11.2613	11.179	11.4385	11.3811	11.4691	11.2018
742	ENSMUSG00000005397	Nid1	-0.775004	0.00321459	11.871	12.3884	11.8025	12.7918	12.8908	12.7739
743	ENSMUSG00000005410	Mcm5	-0.0380195	0.900666	13.9457	13.7388	13.8687	13.9569	14.0306	13.6614
744	ENSMUSG00000005413	Hmox1	0.449418	0.00988168	10.5916	10.7911	10.6845	10.2646	10.213	10.2516
745	ENSMUSG00000005417	Mprip	-0.0375027	0.809628	13.5953	13.5509	13.4938	13.5721	13.5781	13.604
746	ENSMUSG00000005442	Cic	0.0868983	0.656755	12.699	12.7351	12.5931	12.5885	12.6749	12.5022
747	ENSMUSG00000005447	Pafah1b3	0.308958	0.184418	12.1673	12.1102	12.0728	11.7986	12.0472	11.5353
748	ENSMUSG00000005465	Il27ra	-3.7409	3.39277e-05	4.68394	2	4.59405	7.95765	7.61198	6.97161
749	ENSMUSG00000005469	Prkaca	-0.341803	0.01852	12.8366	12.8496	12.7766	13.1317	13.1894	13.1672
750	ENSMUSG00000005470	Asf1b	-0.783121	7.33894e-06	10.1811	10.2038	10.1884	11.0584	10.8836	10.9693
751	ENSMUSG00000005481	Ddx39a	-0.656521	5.89318e-07	12.6629	12.5624	12.5228	13.3436	13.2911	13.0716
752	ENSMUSG00000005483	Dnajb1	0.187025	0.546912	11.652	11.1055	11.4023	11.2983	10.9954	11.334
753	ENSMUSG00000005501	Usp40	-0.345454	0.282142	9.83258	9.20149	9.60812	9.82411	9.84173	10.0643
754	ENSMUSG00000005503	Evx1	5.1959	0.016981	6.26044	4.49491	6.67789	2	3.19836	2
755	ENSMUSG00000005505	Kbtbd4	0.0787782	0.854288	8.8857	8.8079	8.71041	8.66421	8.93301	8.55263
756	ENSMUSG00000005506	Celf1	-0.279288	0.0549477	13.1698	13.1038	12.9871	13.3305	13.2687	13.4955
757	ENSMUSG00000005510	Ndufs3	-0.99092	3.05299e-07	11.4361	11.1514	11.577	12.4499	12.4108	12.3008
758	ENSMUSG00000005514	Por	-0.531172	0.00405214	11.3615	11.1911	11.4684	11.7459	12.0714	11.7857
759	ENSMUSG00000005533	Igf1r	-0.22929	0.289195	11.9367	11.9274	11.7086	11.9177	12.1155	12.2221
760	ENSMUSG00000005534	Insr	-0.590838	0.0167511	10.1028	9.86625	10.0339	10.4137	10.5435	10.7959
761	ENSMUSG00000005540	Fcer2a	1.64733	#N/A	2.95878	2	4.52144	2	3.49196	2
762	ENSMUSG00000005553	Atp4a	-0.794357	0.629063	4.92707	5.25425	5.02012	5.6849	5.33106	6.22328
763	ENSMUSG00000005566	Trim28	0.133767	0.521987	15.5811	15.4496	15.4849	15.3146	15.547	15.2377
764	ENSMUSG00000005575	Ube2m	-0.462289	0.0146482	13.0391	12.901	13.1404	13.5796	13.5915	13.2852
765	ENSMUSG00000005580	Adcy9	-0.350332	0.785487	7.05834	5.82564	5.17014	6.02566	6.31498	7.13387
766	ENSMUSG00000005583	Mef2c	-0.866797	0.00035875	10.4184	10.5727	10.4662	10.998	11.3522	11.6362
767	ENSMUSG00000005609	Ctr9	0.735699	5.59942e-06	11.6859	11.9762	11.772	10.9411	11.225	11.0656
768	ENSMUSG00000005610	Eif4g2	0.388959	0.000328425	15.2676	15.3941	15.2647	14.8248	14.9544	14.9795
769	ENSMUSG00000005611	Irag1	-0.970645	0.0089096	7.84849	8.33635	8.14848	9.18425	9.01906	9.04676
770	ENSMUSG00000005615	Pcyt1a	-0.28324	0.117788	11.3333	11.4516	11.0698	11.4961	11.5376	11.6894
771	ENSMUSG00000005621	Zfp592	-0.0851361	0.729624	10.9326	10.8819	10.7174	10.8435	10.8748	11.0676
772	ENSMUSG00000005625	Psmd4	-0.13785	0.343985	12.7063	12.6134	12.6887	12.8747	12.8492	12.6929
773	ENSMUSG00000005628	Tmod4	-0.152045	0.953145	4.51559	2	5.02012	4.76523	3.73579	4.58009
774	ENSMUSG00000005656	Snx6	1.22608	2.07811e-14	11.9547	12.2889	12.1027	10.8074	11.1382	10.7118
775	ENSMUSG00000005667	Mthfd2	-0.192002	0.472155	11.0751	11.0361	11.2165	11.2672	11.1696	11.4567
776	ENSMUSG00000005672	Kit	-1.44637	1.44083e-06	8.27055	8.10529	8.04868	9.64002	9.55633	9.53721
777	ENSMUSG00000005674	Tomm40l	-1.73855	2.25638e-06	8.94767	8.13565	8.28633	10.3	10.2962	10.0816
778	ENSMUSG00000005681	Apoa2	3.73309	0.000479131	5.98757	8.30997	6.99187	4.92396	2.33223	3.80318
779	ENSMUSG00000005682	Pan2	-0.0181503	0.948812	11.0099	11.0042	10.8941	10.8843	11.0493	11.0269
780	ENSMUSG00000005683	Cs	-1.22286	1.92846e-40	13.4754	13.5073	13.4757	14.6846	14.6889	14.7519
781	ENSMUSG00000005686	Ampd3	1.023	0.0640571	8.27055	8.79527	8.43703	7.3031	7.49259	7.7085
782	ENSMUSG00000005687	Bcas2	0.026741	0.910532	11.244	11.2356	11.3009	11.3587	11.1742	11.1597
783	ENSMUSG00000005698	Ctcf	0.643326	2.02972e-06	11.8316	11.9515	11.7404	11.1755	11.2374	11.1908
784	ENSMUSG00000005699	Pard6a	-0.931054	0.140551	7.75075	6.70802	8.14848	8.43731	8.68328	8.57541
785	ENSMUSG00000005705	Agrp	0.225449	0.968288	2.95878	2	3.12789	2.33751	3.35262	2
786	ENSMUSG00000005716	Pvalb	-2.85248	0.0151295	5.47825	3.67646	5.38999	7.3127	8.28853	7.41214
787	ENSMUSG00000005718	Tfap4	0.511479	0.16688	9.77003	8.84206	9.62121	9.10637	8.95124	8.7951
788	ENSMUSG00000005732	Ranbp1	0.1934	0.305262	11.7109	11.6653	11.8173	11.5635	11.3193	11.7084
789	ENSMUSG00000005763	Cd247	0.963745	#N/A	2.30558	2	2	2	2	2
790	ENSMUSG00000005774	Rfx5	0.69767	0.164727	8.71478	8.6238	8.72261	8.14662	8.02728	7.80161
791	ENSMUSG00000005779	Psmb4	-0.105291	0.562797	13.2332	13.0253	13.008	13.2883	13.2171	13.0806
792	ENSMUSG00000005802	Slc30a4	0.196748	0.748798	8.84483	8.36654	8.49031	8.14662	8.41651	8.56786
793	ENSMUSG00000005803	Sqor	2.50824	0.0582518	4.57392	5.58282	4.85265	3.21279	3.84381	2
794	ENSMUSG00000005804	Bloc1s6	0.304269	0.154738	10.3543	10.5559	10.3267	10.0844	10.0674	10.184
795	ENSMUSG00000005813	Metap1	-0.256496	0.123767	11.0046	10.7887	10.8778	11.1781	11.1322	11.1369
796	ENSMUSG00000005823	Gpr108	-0.557157	0.0639053	9.3473	8.60945	9.08889	9.64763	9.54637	9.6052
797	ENSMUSG00000005824	Tnfsf14	-1.50037	0.763439	2	2	3.98676	3.21279	3.02562	4.80234
798	ENSMUSG00000005836	Gata6	1.15659	4.73279e-15	13.2301	13.2315	13.1202	11.8319	12.1199	12.1449
799	ENSMUSG00000005846	Rsl1d1	0.483105	0.0142558	11.4706	12.09	11.8948	11.4792	11.3453	11.2409
800	ENSMUSG00000005871	Apc	-0.0732506	0.90478	9.93766	10.568	9.69734	9.76065	10.0702	10.607
801	ENSMUSG00000005873	Reep5	-0.502537	0.00204963	11.5742	11.8248	11.4483	12.2611	12.1168	11.9892
802	ENSMUSG00000005881	Ergic3	-0.389244	0.0152964	12.1667	11.8391	12.0472	12.3561	12.5074	12.3703
803	ENSMUSG00000005882	Uqcc1	-0.834377	1.63645e-06	10.3143	10.3544	10.2102	11.1748	11.2194	10.975
804	ENSMUSG00000005886	Ncoa2	0.268433	0.391257	10.9745	11.2233	10.7436	10.4325	10.7275	10.9686
805	ENSMUSG00000005892	Trh	0.125476	0.978858	4.45481	2	2.67147	2.33751	4.43357	2
806	ENSMUSG00000005893	Nr2c2	0.622228	0.063207	9.78399	10.0328	9.03774	9.04146	9.25257	8.85529
807	ENSMUSG00000005897	Nr2c1	0.152021	0.729624	8.97228	9.47124	8.75464	8.96438	8.95124	8.92789
808	ENSMUSG00000005899	Smpd4	-0.430344	0.00416015	11.5344	11.6795	11.5135	11.9969	12.0068	12.0193
809	ENSMUSG00000005907	Pex1	-0.225334	0.603002	8.49845	8.23248	8.23617	8.27001	8.58163	8.75907
810	ENSMUSG00000005917	Otx1	1.308	0.696322	3.40676	6.03343	2	3.03864	3.84381	4.08299
811	ENSMUSG00000005936	Kctd20	0.309273	0.0212663	12.4943	12.4339	12.3866	12.1393	12.0855	12.1641
812	ENSMUSG00000005947	Itgae	-4.67964	0.0250555	2.55761	2	2.37445	5.27767	5.04454	4.24331
813	ENSMUSG00000005949	Ctns	-0.445086	0.182307	8.44866	8.50089	8.0932	8.81366	8.79179	8.7951
814	ENSMUSG00000005950	P2rx5	-4.78521	0.0444193	2	2	2.67147	4.14614	4.99853	4.58009
815	ENSMUSG00000005951	Shpk	1.55543	0.349881	5.38359	5.32622	5.71701	4.22959	4.95101	2
816	ENSMUSG00000005958	Ephb3	-0.925379	4.73933e-09	11.3459	11.3479	11.277	12.0986	12.2711	12.3629
817	ENSMUSG00000005968	Tuft1	-0.141482	0.796304	8.60718	8.10529	8.74271	8.55117	8.78164	8.60523
818	ENSMUSG00000005973	Rcn1	0.550183	0.000624915	12.4073	12.5617	12.3773	11.7921	11.7769	12.1098
819	ENSMUSG00000005980	Dnase1	-0.487616	0.433171	6.63387	6.68082	6.79031	6.95639	7.38941	7.14406
820	ENSMUSG00000005981	Trap1	-0.482586	0.000106762	11.8593	11.9966	11.9373	12.475	12.4315	12.3329
821	ENSMUSG00000005982	Naa60	-0.440543	0.0502627	10.0434	9.60927	9.81212	10.2683	10.2503	10.2957
822	ENSMUSG00000005983	1700037C18Rik	-0.756078	0.332392	6.05054	6.96634	6.18492	7.50918	6.67813	7.26109
823	ENSMUSG00000005986	Ankrd13d	1.57339	0.0154964	7.19469	8.18003	7.15674	5.6849	6.23788	6.24238
824	ENSMUSG00000006005	Tpr	0.643382	0.0485667	11.006	12.1157	11.4532	10.6084	10.918	11.265
825	ENSMUSG00000006010	Odr4	0.616804	0.262538	7.6927	8.82352	8.36105	7.45819	7.86368	7.90713
826	ENSMUSG00000006019	Dhx34	-0.364236	0.133599	10.1752	10.1613	10.1618	10.6383	10.6846	10.2218
827	ENSMUSG00000006021	Kptn	-0.686986	0.0346602	9.77625	9.55414	9.81212	10.6113	10.6186	9.85371
828	ENSMUSG00000006024	Napa	-0.349784	0.0284229	12.1075	12.0354	12.1475	12.3865	12.4511	12.501
829	ENSMUSG00000006050	Sra1	-0.0536115	0.857096	10.7295	10.8334	10.5967	10.752	10.6764	10.8935
830	ENSMUSG00000006057	Atp5g1	-1.8665	1.91484e-29	12.0311	11.6136	12.0042	13.8429	13.8708	13.546
831	ENSMUSG00000006058	Snf8	-0.146988	0.60849	10.9066	10.7059	10.7376	10.877	10.9087	11.0096
832	ENSMUSG00000006095	Tbcb	-0.148628	0.554592	11.8637	11.5323	11.8154	11.9725	11.9929	11.6942
833	ENSMUSG00000006127	Inpp5k	0.272207	0.633912	9.64637	8.81417	9.51302	9.17901	9.09207	9.01656
834	ENSMUSG00000006134	Crkl	0.443502	0.003492	11.7615	11.8333	11.6438	11.2498	11.265	11.3972
835	ENSMUSG00000006143	Upk3bl	1.5807	#N/A	4.51559	2	2	3.36817	2	2
836	ENSMUSG00000006154	Eps8l1	-1.72009	0.429229	5.05544	2	4.27873	4.76523	5.40346	6.48626
837	ENSMUSG00000006169	Clint1	0.307707	0.0214408	12.2814	12.3752	12.2271	11.9584	11.9796	12.0265
838	ENSMUSG00000006179	Prss16	1.07089	0.720798	3.64305	4.67108	3.75308	3.75367	3.73579	2
839	ENSMUSG00000006191	Cdkal1	-0.257957	0.62224	7.77581	8.25109	8.07428	8.27493	8.2933	8.33407
840	ENSMUSG00000006200	Rhox6	5.90603	0.0617295	4.2554	2	4.52144	2	2	2
841	ENSMUSG00000006205	Htra1	-1.23752	0.440206	6.66103	4.22055	6.25377	7.03967	7.69365	6.74925
842	ENSMUSG00000006215	Zbtb17	-0.158044	0.543925	10.9927	10.517	10.841	10.9364	11.1275	10.7788
843	ENSMUSG00000006216	Clcnkb	-5.9173	#N/A	2	2	2	3.75367	4.851	2
844	ENSMUSG00000006218	Fam131c	-0.583861	0.72074	2.95878	6.21502	3.87465	5.06695	5.85458	5.5796
845	ENSMUSG00000006219	Fblim1	-1.3356	2.64365e-19	10.0753	9.93261	10.0709	11.311	11.4044	11.3627
846	ENSMUSG00000006221	Hspb7	-7.35168	2.4294e-31	7.85439	5.49186	7.64089	14.5558	14.4585	14.8326
847	ENSMUSG00000006235	Epor	0.0422114	0.959911	8.8389	7.76029	9.4262	8.96742	8.85447	8.49007
848	ENSMUSG00000006241	Ccdc159	-0.242199	0.872177	6.77729	4.14296	6.48136	6.62769	6.23788	6.31637
849	ENSMUSG00000006262	Mob1b	-0.38059	0.400623	9.7385	9.86625	9.84411	9.73946	10.0478	10.6497
850	ENSMUSG00000006273	Atp6v1b2	-0.207951	0.278873	12.2629	12.08	12.2213	12.3256	12.4945	12.3684
851	ENSMUSG00000006276	Eps15l1	-0.0251777	0.909392	11.4995	11.4191	11.563	11.4749	11.5431	11.5411
852	ENSMUSG00000006281	Tep1	0.157068	0.631076	9.80697	10.0462	9.81782	9.79188	9.83028	9.58102
853	ENSMUSG00000006288	Ttc5	-0.242176	0.322435	10.581	10.3544	10.4818	10.7082	10.7017	10.7407
854	ENSMUSG00000006289	Osgep	-0.251422	0.329567	10.2764	9.94266	9.98746	10.4125	10.2806	10.2853
855	ENSMUSG00000006299	Aamp	-0.279378	0.174913	12.7625	12.4896	12.7156	13.0746	13.0888	12.6061
856	ENSMUSG00000006301	Tmbim1	-0.748488	0.0010664	9.48476	9.69162	9.64062	10.4325	10.3949	10.2254
857	ENSMUSG00000006304	Arpc2	-0.180754	0.313776	12.3612	12.5843	12.698	12.7156	12.6197	12.8595
858	ENSMUSG00000006307	Kmt2b	-0.310101	0.0654003	12.1563	12.1576	11.921	12.2275	12.5635	12.3667
859	ENSMUSG00000006310	Zbtb32	1.81102	0.518694	3.40676	5.49186	3.87465	2.84054	4.12646	2
860	ENSMUSG00000006311	Etv2	-5.25567	0.00852012	3.52974	2	4.59405	8.60294	8.1322	8.63083
861	ENSMUSG00000006313	Upk1a	1.24403	0.487973	5.98757	5.77511	4.09079	4.58685	5.17436	2
862	ENSMUSG00000006315	Tmem147	-0.673861	0.0105612	10.7714	10.7581	10.6143	11.5376	11.3894	11.223
863	ENSMUSG00000006333	Rps9	0.162067	0.440132	15.3875	14.9844	15.2438	15.189	14.9953	14.9633
864	ENSMUSG00000006335	Tfpt	-0.100378	0.792318	9.36805	9.71024	9.15337	9.48097	9.48304	9.61989
865	ENSMUSG00000006342	Susd2	0.190648	0.899607	4.45481	6.86124	5.50743	5.6849	5.36772	6.12377
866	ENSMUSG00000006344	Ggt5	-6.6524	1.08635e-05	2.55761	2	2.37445	6.89381	6.70702	6.6091
867	ENSMUSG00000006345	Ggt1	-1.29527	0.397756	3.84602	2	5.17014	5.19703	4.62741	5.74947
868	ENSMUSG00000006356	Crip2	-5.17365	5.23049e-225	10.475	10.5699	10.6583	15.7675	15.8335	15.608
869	ENSMUSG00000006360	Crip1	-3.69735	5.95692e-63	8.45255	7.60257	8.04868	11.7313	11.8284	11.6994
870	ENSMUSG00000006362	Cbfa2t3	0.71596	0.00150054	11.2117	11.4937	10.9905	10.2879	10.3949	10.8506
871	ENSMUSG00000006369	Fbln1	-1.23518	1.08111e-15	12.9833	12.8532	12.9524	14.0991	14.3154	14.0691
872	ENSMUSG00000006373	Pgrmc1	1.13243	3.21485e-14	11.7779	11.7974	11.613	10.5169	10.5713	10.7093
873	ENSMUSG00000006378	Gcat	0.177926	0.722439	8.29676	7.86065	8.55994	8.25515	7.94477	8.05493
874	ENSMUSG00000006386	Tek	-1.14527	8.3724e-08	10.6814	10.8767	10.8372	11.9099	11.9531	11.9693
875	ENSMUSG00000006389	Mpl	-3.77594	0.00885251	4.02393	2	4.79222	7.12931	7.48426	7.51784
876	ENSMUSG00000006390	Elovl1	-0.604093	0.001925	10.3491	10.1736	10.3025	10.9656	10.6828	10.9714
877	ENSMUSG00000006392	Med8	-0.069013	0.817331	10.9933	10.6128	11.057	11.0201	10.8772	11.0061
878	ENSMUSG00000006395	Hyi	-0.195837	0.6304	8.83592	8.46148	8.81284	9.08412	8.80855	8.81118
879	ENSMUSG00000006398	Cdc20	-0.171492	0.283971	13.1318	12.7995	13.0748	13.2065	13.1619	13.1728
880	ENSMUSG00000006403	Adamts4	0.934392	0.322678	6.62009	7.76677	6.01021	6.44772	6.47473	4.85294
881	ENSMUSG00000006411	Nectin4	0.00893464	1	3.84602	2	2	2.61084	3.61902	2
882	ENSMUSG00000006412	Pfdn2	0.179763	0.451785	11.3573	11.4751	11.3871	11.2322	11.1395	11.307
883	ENSMUSG00000006418	Rnf114	-0.143509	0.454532	11.9618	11.9063	11.7876	11.9921	12.1745	11.9126
884	ENSMUSG00000006423	C330007P06Rik	1.15947	2.32598e-05	9.31987	9.88574	9.34438	8.48902	8.13752	8.51777
885	ENSMUSG00000006435	Neurl1a	-0.115323	0.839564	8.65862	8.88439	8.90133	8.92424	8.74379	9.10793
886	ENSMUSG00000006442	Srm	-0.215415	0.353257	12.9967	12.8993	13.1589	13.3122	13.3048	13.0843
887	ENSMUSG00000006445	Epha2	-1.35282	1.37975e-11	9.59272	9.20149	9.65978	10.8915	10.8483	10.7959
888	ENSMUSG00000006456	Rbm14	-0.00633208	0.982341	12.2593	12.3012	12.242	12.1903	12.2906	12.3373
889	ENSMUSG00000006457	Actn3	3.87296	1.65023e-27	11.3464	11.0907	11.5077	7.49238	7.8828	6.9132
890	ENSMUSG00000006463	Zdhhc24	0.0151938	0.983994	9.16484	8.6238	8.83921	8.80349	8.59329	9.17658
891	ENSMUSG00000006464	Bbs1	0.260053	0.55631	8.48331	8.48132	8.54628	8.12499	8.3766	8.22785
892	ENSMUSG00000006471	Ndor1	-0.0434459	0.942466	8.03653	7.79875	7.99606	7.77528	7.83124	8.30256
893	ENSMUSG00000006476	Nsmf	-0.349413	0.102264	10.5907	10.5446	10.4232	10.9161	11.033	10.6326
894	ENSMUSG00000006488	Prl7a1	1.53074	0.750195	3.52974	2	3.87465	3.21279	2.33223	2
895	ENSMUSG00000006494	Pdk1	-0.445217	0.0370714	11.6888	12.0699	11.9307	12.3318	12.255	12.4551
896	ENSMUSG00000006498	Ptbp1	1.02543	3.19283e-26	14.7673	14.7214	14.6428	13.6417	13.7309	13.6847
897	ENSMUSG00000006517	Mvd	-1.40243	0.00476679	10.5486	9.76144	10.8307	11.896	11.7761	11.8645
898	ENSMUSG00000006519	Cyba	-2.01401	2.47146e-13	9.88679	9.50653	9.91845	11.9197	11.8309	11.6052
899	ENSMUSG00000006522	Itih3	-1.97827	0.0242693	3.27232	5.01389	4.52144	6.26201	6.37022	5.92527
900	ENSMUSG00000006526	Stimate	0.307441	0.242841	9.8251	9.83421	9.74794	9.47884	9.35654	9.64164
901	ENSMUSG00000006527	Sfmbt1	0.270269	0.416357	9.35147	9.47124	8.98472	9.0672	8.86092	9.10793
902	ENSMUSG00000006529	Itih1	4.34978	0.0579349	2	2	3.98676	2	2	2
903	ENSMUSG00000006538	Ihh	0.135538	0.959823	2.30558	2	4.36425	3.86224	3.19836	2
904	ENSMUSG00000006542	Prkag3	-3.78244	0.00396975	2.95878	4.14296	2.37445	6.77385	6.15642	6.48626
905	ENSMUSG00000006567	Atp7b	-1.8417	4.80925e-10	8.98308	8.75019	8.16049	10.2964	10.4801	10.7058
906	ENSMUSG00000006574	Slc4a1	0.775864	0.385969	12.645	11.3656	13.521	12.2433	11.9134	11.7507
907	ENSMUSG00000006575	Rundc3a	-0.324848	0.653909	6.97422	6.23385	7.16868	7.19307	7.13678	7.14406
908	ENSMUSG00000006576	Slc4a3	-0.780929	0.00120236	9.34521	9.72196	9.54084	10.4705	10.2758	10.2061
909	ENSMUSG00000006585	Cdt1	-0.324423	0.0515275	11.9872	11.7397	11.9442	12.1775	12.2826	12.1929
910	ENSMUSG00000006586	Runx1t1	1.41778	4.41296e-06	9.9293	9.87528	9.88266	8.14662	8.14282	8.99701
911	ENSMUSG00000006587	Snai3	-6.7183	2.73452e-07	2.95878	2	2	7.35976	7.09367	6.99433
912	ENSMUSG00000006589	Aprt	-0.312042	0.205567	13.1417	12.7532	13.0862	13.4316	13.4341	13.0477
913	ENSMUSG00000006599	Gtf2h1	0.46233	0.128545	9.68658	9.71862	9.9395	9.41566	9.36563	9.18648
914	ENSMUSG00000006611	Hfe	-2.14889	0.0878867	4.39135	4.22055	5.02012	6.8284	6.29609	6.42069
915	ENSMUSG00000006638	Abhd1	0.382453	0.866705	4.2554	5.74916	5.78062	4.82011	5.69065	4.38758
916	ENSMUSG00000006641	Slc5a6	-0.72073	0.0206358	9.45984	8.6238	9.15637	9.81907	9.67259	9.9998
917	ENSMUSG00000006651	Aplp1	2.90422	3.81695e-53	12.6099	12.4123	12.8696	9.68876	10.0618	9.40781
918	ENSMUSG00000006673	Qrich1	0.351057	0.00968969	12.2084	12.2801	12.1384	11.8936	11.7837	11.8984
919	ENSMUSG00000006675	P4htm	-2.07084	8.94026e-06	7.54744	6.23385	7.48734	9.51047	9.31959	8.80798
920	ENSMUSG00000006676	Usp19	-0.416024	0.00813381	12.8131	12.756	12.821	13.1667	13.3845	13.069
921	ENSMUSG00000006678	Pola1	1.19452	0.000190129	9.80697	10.7269	10.0597	8.91482	9.08933	9.1741
922	ENSMUSG00000006699	Cdc42	0.319832	0.0144278	13.3739	13.5072	13.4706	13.1585	13.15	13.0862
923	ENSMUSG00000006705	Pknox1	0.187675	0.598838	10.0147	10.0959	9.64917	9.84742	9.79707	9.58102
924	ENSMUSG00000006715	Gmnn	0.185435	0.558724	10.2775	10.5342	10.5609	10.2757	10.2914	10.2668
925	ENSMUSG00000006717	Acot13	-0.877579	0.011631	7.70581	8.20888	8.36105	9.11187	9.07	8.74575
926	ENSMUSG00000006720	Zfp184	0.7619	0.18382	7.48801	7.03238	7.10799	6.2013	6.5878	6.63824
927	ENSMUSG00000006724	Cyp27b1	1.96218	#N/A	2.7721	4.67108	2	2.61084	3.02562	2
928	ENSMUSG00000006728	Cdk4	0.306366	0.0153598	14.9843	14.8543	14.9392	14.6878	14.6292	14.5411
929	ENSMUSG00000006731	B4galnt1	-0.706131	0.472232	6.14975	6.13712	5.34862	6.2817	6.73535	6.72229
930	ENSMUSG00000006732	Mettl1	-0.349832	0.161356	10.3657	10.0568	10.3557	10.6825	10.63	10.5285
931	ENSMUSG00000006736	Tspan31	-0.263134	0.2787	10.8859	10.6597	10.8003	11.2517	11.0315	10.8286
932	ENSMUSG00000006740	Kif5b	0.0139244	0.982158	11.2048	11.601	11.4323	10.8697	11.2374	11.9164
933	ENSMUSG00000006763	Saal1	0.297756	0.26663	10.5006	10.4957	10.4866	10.1367	10.1747	10.2773
934	ENSMUSG00000006777	Krt23	4.04921	0.129365	3.93772	5.52282	4.27873	2.33751	2.82934	2
935	ENSMUSG00000006782	Cnp	-0.084816	0.842139	9.14814	9.30085	9.28804	9.35656	9.53231	9.06833
936	ENSMUSG00000006784	Odad4	0.262808	0.946728	4.97114	2	4.96643	4.38326	4.56565	3.69639
937	ENSMUSG00000006800	Sulf2	-0.495021	0.000518191	12.8339	12.7008	12.6746	13.1759	13.2826	13.2385
938	ENSMUSG00000006818	Sod2	-1.2463	6.06897e-22	11.1609	11.0076	10.9163	12.3101	12.2403	12.2796
939	ENSMUSG00000006850	Tmco6	-0.434248	0.332279	8.63484	8.18003	8.96432	9.04722	9.09481	9.03037
940	ENSMUSG00000006906	Stambp	-0.680747	0.109465	8.02089	8.8016	8.07428	9.0123	9.15371	8.87989
941	ENSMUSG00000006920	Ezh1	-0.717983	0.0190806	8.39709	9.03696	8.59132	9.35656	9.31725	9.55451
942	ENSMUSG00000006930	Hap1	-1.49835	0.00109398	7.29346	7.0107	6.85083	8.45041	8.94519	8.07638
943	ENSMUSG00000006931	P3h4	1.46964	5.98205e-18	13.4258	13.0605	13.1416	11.6696	11.7909	11.7845
944	ENSMUSG00000006932	Ctnnb1	0.466839	0.000300671	14.5583	14.7179	14.5653	14.0962	14.0862	14.2581
945	ENSMUSG00000006941	Eif1b	-0.483874	0.00870704	10.6748	10.3063	10.6887	11.1341	11.0244	10.9864
946	ENSMUSG00000006958	Chrd	1.93036	0.1844	6.62009	2	6.97837	4.58685	4.74353	4.16538
947	ENSMUSG00000006998	Psmd2	-0.0345978	0.856556	14.1906	14.1466	14.1597	14.1596	14.1221	14.3123
948	ENSMUSG00000007021	Syngr3	1.93515	0.047981	5.3506	7.13614	5.54455	4.58685	4.43357	4.51873
949	ENSMUSG00000007029	Vars	-0.150736	0.538759	13.5611	13.4278	13.7273	13.7231	13.8351	13.6173
950	ENSMUSG00000007030	Vwa7	-1.65668	0.331621	2.95878	5.49186	2	5.42655	4.99853	6.29823
951	ENSMUSG00000007033	Hspa1l	-3.42033	#N/A	4.02393	2	2.37445	5.19703	5.13237	6.42069
952	ENSMUSG00000007034	Slc44a4	-1.76068	0.193764	2.55761	4.06096	4.09079	4.76523	2.82934	6.14423
953	ENSMUSG00000007035	Msh5	-1.05298	0.0975195	6.39594	5.87447	6.18492	7.35047	6.88193	7.26109
954	ENSMUSG00000007036	Abhd16a	-0.545695	0.00848296	10.5034	10.11	10.699	10.9572	11.08	10.9643
955	ENSMUSG00000007038	Neu1	-0.795048	0.000442297	9.67829	9.30531	9.65342	10.2027	10.2997	10.5197
956	ENSMUSG00000007039	Ddah2	0.745623	9.77785e-10	13.2476	13.0086	13.2377	12.4618	12.5063	12.2939
957	ENSMUSG00000007041	Clic1	-0.342702	0.00728609	13.2295	13.1692	13.4125	13.6914	13.6094	13.5454
958	ENSMUSG00000007050	Lsm2	-0.401484	0.0262611	11.4277	11.5266	11.5106	11.9481	11.9452	11.7694
959	ENSMUSG00000007080	Pole	0.321486	0.172605	11.3093	11.6051	11.1962	10.8251	11.1664	11.1622
960	ENSMUSG00000007097	Atp1a2	-5.68898	0.00308437	5.53807	2	5.87105	10.8142	10.7811	10.5039
961	ENSMUSG00000007107	Atp1a4	-6.15655	#N/A	2	2	2	2.84054	4.12646	4.80234
962	ENSMUSG00000007122	Casq1	-7.82458	7.27736e-08	5.65075	2	7.35779	13.8071	13.9862	13.9801
963	ENSMUSG00000007207	Stx1a	-0.028621	0.971787	8.06222	8.85732	7.62365	8.2351	8.47647	8.1791
964	ENSMUSG00000007216	Zfp775	-0.0778477	0.878614	8.76572	8.93993	8.73871	8.92424	8.80187	8.9542
965	ENSMUSG00000007279	Scube2	-2.39469	0.0333964	5.80482	5.55313	4.85265	7.57447	7.21933	8.24215
966	ENSMUSG00000007338	Mrpl49	-0.140626	0.586935	11.0927	11.007	11.0376	11.2436	11.1262	11.1877
967	ENSMUSG00000007379	Dennd2c	-0.769042	0.493997	5.44738	4.22055	6.57402	6.51579	6.52428	6.24238
968	ENSMUSG00000007411	Mark3	-0.0542757	0.833163	11.4801	11.6448	11.5937	11.655	11.5654	11.6635
969	ENSMUSG00000007415	Gatad1	-0.134872	0.435407	11.8779	11.8005	11.9615	12.0099	11.9789	12.0582
970	ENSMUSG00000007458	M6pr	-0.0814199	0.75156	11.3646	11.4129	11.5159	11.6197	11.4192	11.495
971	ENSMUSG00000007476	Lrrc8a	-0.227243	0.640948	8.53927	8.19453	8.34009	8.48053	8.38109	8.86148
972	ENSMUSG00000007564	Ppp2r1a	-0.367608	0.0073215	14.2497	14.1717	14.2338	14.5085	14.6903	14.5539
973	ENSMUSG00000007570	Fance	-0.279714	0.291196	10.0536	10.1138	9.93601	10.3393	10.2926	10.3138
974	ENSMUSG00000007589	Tinf2	-0.29993	0.161745	10.6205	10.3141	10.3307	10.8293	10.7862	10.5545
975	ENSMUSG00000007591	Tssk4	0.688475	0.73984	4.97114	4.92397	5.17014	4.22959	4.20958	4.80234
976	ENSMUSG00000007594	Hapln4	-0.0607887	0.9405	6.80191	6.4098	6.77478	6.62769	6.5878	6.94853
977	ENSMUSG00000007603	Dus3l	-0.466908	0.0424858	10.8722	10.6727	10.6636	11.2819	11.3777	10.9175
978	ENSMUSG00000007610	Gtpbp3	-0.581277	0.00866536	10.1237	9.7136	10.2102	10.6478	10.6177	10.565
979	ENSMUSG00000007613	Tgfbr1	1.49786	4.66686e-07	11.441	11.799	11.3304	9.64573	9.90856	10.4546
980	ENSMUSG00000007617	Homer1	-1.05083	0.000459179	9.30488	9.1627	9.29894	10.1475	10.0149	10.6622
981	ENSMUSG00000007646	Rad51c	-0.238675	0.625618	8.3478	8.43324	8.23049	8.58324	8.18963	8.87378
982	ENSMUSG00000007653	Gabrb2	-3.92147	0.153311	2.55761	2	2.67147	4.05757	4.12646	5.38702
983	ENSMUSG00000007655	Cav1	-1.52813	0.00774827	7.80045	6.9089	8.36105	8.4634	9.78018	9.41203
984	ENSMUSG00000007656	Arpp19	0.160689	0.525732	11.5827	11.482	11.7987	11.5504	11.3945	11.4505
985	ENSMUSG00000007659	Bcl2l1	-0.29922	0.110359	11.1063	11.0448	10.9296	11.4354	11.2571	11.2842
986	ENSMUSG00000007670	Khsrp	-0.218671	0.334717	13.2695	13.2655	13.1296	13.4139	13.4567	13.4538
987	ENSMUSG00000007721	Ccdc124	-0.449519	0.0306519	11.6566	11.0907	11.7329	12.0106	12.032	11.8591
988	ENSMUSG00000007739	Cct4	0.458931	0.00128559	13.3092	13.5589	13.5506	13.0476	13.0788	12.9251
989	ENSMUSG00000007777	0610009B22Rik	0.556967	0.206197	7.97292	8.26489	8.29724	7.92046	7.6571	7.26109
990	ENSMUSG00000007783	Cpt1c	1.00651	0.00385661	9.42263	9.08443	9.0731	8.40177	8.19983	7.98859
991	ENSMUSG00000007805	Twist2	1.61299	0.000681743	7.75075	8.22309	7.8847	6.2817	6.49144	6.42069
992	ENSMUSG00000007812	Zfp655	0.120981	0.822811	9.09685	8.70366	8.64784	8.69756	8.54609	8.87071
993	ENSMUSG00000007815	Rhoa	-0.282208	0.0261711	13.2291	13.2336	13.1841	13.5087	13.5694	13.4113
994	ENSMUSG00000007817	Zmiz1	0.856162	1.62766e-08	13.7309	13.8315	13.5349	12.7393	12.8593	12.9398
995	ENSMUSG00000007827	Ankrd26	0.596511	0.175235	9.63614	8.56552	8.98472	8.70851	7.81806	8.88294
996	ENSMUSG00000007833	Aldh16a1	-0.0751816	0.79829	11.3917	11.108	11.3009	11.3725	11.4895	11.1591
997	ENSMUSG00000007836	Hnrnpa0	0.707616	1.41031e-10	15.436	15.2158	15.437	14.709	14.6119	14.6547
998	ENSMUSG00000007837	Prrg2	-0.316832	0.529927	7.71231	7.97141	8.20173	8.04086	8.43821	8.35177
999	ENSMUSG00000007850	Hnrnph1	0.993976	2.73452e-07	13.1659	13.4415	13.6272	12.3477	12.3534	12.5777
1000	ENSMUSG00000007867	Ift43	-0.389803	0.127676	9.51112	9.92683	9.74993	10.3024	10.1381	9.91601
1001	ENSMUSG00000007872	Id3	1.30116	1.92311e-19	13.5383	13.1247	13.5363	12.1069	12.2738	11.9356
1002	ENSMUSG00000007877	Tcap	-7.49417	#N/A	3.84602	2	4.91066	11.3056	10.9998	10.9628
1003	ENSMUSG00000007880	Arid1a	0.00622135	0.980498	13.6246	13.6725	13.4224	13.4408	13.6218	13.6421
1004	ENSMUSG00000007888	Crlf1	-0.982889	0.728422	3.84602	4.06096	4.09079	4.05757	4.79826	5.28015
1005	ENSMUSG00000007891	Ctsd	-0.725478	1.8035e-06	12.2267	12.058	12.2737	12.8688	13.0462	12.8169
1006	ENSMUSG00000007892	Rplp1	-0.000420738	1	15.6675	15.2405	15.4806	15.7657	15.4201	15.1739
1007	ENSMUSG00000007908	Hmgcll1	-0.724919	0.636028	6.00887	6.4098	6.23119	6.73153	6.74931	7.22312
1008	ENSMUSG00000007944	Ttc9b	-2.68369	0.405426	2	2	3.12789	4.05757	2.82934	4.16538
1009	ENSMUSG00000007946	Phox2a	-3.04711	0.00038438	4.68394	4.36424	3.47409	7.43201	6.25754	7.13387
1010	ENSMUSG00000007950	Abhd8	-0.397038	0.16389	10.573	10.1087	10.5404	10.931	11.0114	10.4515
1011	ENSMUSG00000007987	Ift22	0.239036	0.557885	9.79935	9.3274	9.21798	9.27298	9.13523	9.28881
1012	ENSMUSG00000007989	Fzd3	0.708012	0.0752196	9.79323	8.98788	9.42868	8.44606	8.4468	9.18648
1013	ENSMUSG00000008028	1700008O03Rik	-0.92186	0.787135	4.78616	2	2	3.21279	4.56565	4.58009
1014	ENSMUSG00000008035	Mid1ip1	0.310316	0.41553	9.44038	9.67965	9.84225	9.33317	9.28886	9.43712
1015	ENSMUSG00000008036	Ap2s1	-0.217297	0.248123	12.1524	12.0852	12.2001	12.426	12.3903	12.2703
1016	ENSMUSG00000008090	Fgfrl1	-0.155901	0.529415	11.3881	11.2957	11.2078	11.516	11.5713	11.2586
1017	ENSMUSG00000008129	Brme1	0.485114	0.498118	6.72677	6.8733	6.7432	6.11615	6.64864	6.12377
1018	ENSMUSG00000008136	Fhl2	-3.99712	2.58286e-09	7.53281	8.42916	7.50627	11.8361	11.8292	11.9264
1019	ENSMUSG00000008140	Emc10	-0.836843	2.56948e-05	12.172	11.935	12.1632	13.0288	12.918	12.8381
1020	ENSMUSG00000008153	Clstn3	0.932701	0.0353805	7.85439	7.89655	8.07428	7.14014	7.2974	6.56425
1021	ENSMUSG00000008167	Fbxw9	0.204291	0.551866	9.50551	9.5746	9.46301	9.44214	9.31491	9.16662
1022	ENSMUSG00000008193	Spib	0.226486	#N/A	2.55761	2	4.27873	4.22959	2	2
1023	ENSMUSG00000008200	Fnbp4	0.407217	0.255292	10.377	10.7565	10.3426	9.88651	10.1407	10.2456
1024	ENSMUSG00000008206	Cers4	-0.945818	0.00562218	8.14631	8.93131	8.9471	9.7359	9.60895	9.62717
1025	ENSMUSG00000008226	Scrn3	0.619318	0.0885051	8.23484	8.32761	8.61768	8.00579	7.80475	7.52566
1026	ENSMUSG00000008301	Phax	0.512597	0.0185892	9.98947	10.3349	10.3346	9.79701	9.80043	9.54107
1027	ENSMUSG00000008305	Tle1	0.761286	0.0180693	10.0055	9.53338	9.84225	9.13641	9.44281	8.3736
1028	ENSMUSG00000008307	1700109H08Rik	1.31496	0.612528	4.18229	2	3.98676	3.36817	3.02562	2
1029	ENSMUSG00000008318	Relt	-0.826307	0.101652	7.92331	7.26991	8.36624	9.04146	8.50555	8.60154
1030	ENSMUSG00000008333	Snrpb2	0.475057	0.102032	10.0778	9.82958	10.443	9.60138	9.55036	9.82864
1031	ENSMUSG00000008348	Ubc	-0.00234141	0.999024	11.0814	10.7759	11.088	11.0634	10.6654	11.1938
1032	ENSMUSG00000008373	Prpf31	0.174489	0.282892	11.875	11.7589	11.9228	11.7874	11.6714	11.5716
1033	ENSMUSG00000008384	Sertad1	-0.435601	0.151275	9.31132	9.07402	9.38842	9.85893	9.77336	9.42254
1034	ENSMUSG00000008393	Carhsp1	0.362421	0.0237399	13.312	12.8064	13.0968	12.7424	12.6434	12.7833
1035	ENSMUSG00000008398	Elk3	-2.1142	1.86508e-16	8.27055	9.04498	9.0015	10.855	10.8621	11.0262
1036	ENSMUSG00000008429	Herpud2	0.277852	0.38163	10.0511	9.69333	10.2627	9.79359	9.94691	9.44745
1037	ENSMUSG00000008435	Rdh13	-1.02449	7.15407e-07	10.0953	9.46727	9.9395	10.8907	10.8564	10.8897
1038	ENSMUSG00000008438	Adam21	3.18783	#N/A	2.95878	2	4.27873	2.61084	2	2
1039	ENSMUSG00000008450	Nutf2	0.215399	0.303565	11.3558	11.3316	11.3729	11.2233	10.9954	11.1865
1040	ENSMUSG00000008475	Arpc5	0.052805	0.827482	11.8327	11.8871	11.8612	11.8497	11.7018	11.8661
1041	ENSMUSG00000008489	Elavl2	1.74904	0.0549389	6.62009	5.94475	5.21688	4.05757	4.3627	4.90182
1042	ENSMUSG00000008496	Pou2f2	-3.36485	0.245173	3.12405	2	2.37445	4.76523	5.08912	3.58106
1043	ENSMUSG00000008540	Mgst1	1.38557	0.0582719	6.07094	7.79241	7.07031	6.24206	5.90532	5.0823
1044	ENSMUSG00000008575	Nfib	0.531369	0.181734	8.95043	9.1429	9.09202	8.51004	8.2933	8.76899
1045	ENSMUSG00000008601	Rab25	2.04197	0.572139	6.11088	2	4.59405	2	4.62741	2
1046	ENSMUSG00000008604	Ubqln4	-0.110662	0.550598	12.7636	12.5687	12.6866	12.7462	12.711	12.8935
1047	ENSMUSG00000008658	Rbfox1	2.63146	0.00246373	6.42792	6.8733	6.6945	4.58685	4.50112	3.69639
1048	ENSMUSG00000008668	Rps18	-0.327295	0.480131	14.1891	13.8854	14.4478	14.6994	14.4659	14.3733
1049	ENSMUSG00000008682	Rpl10	-0.276034	0.0990269	14.9117	14.7665	14.9036	15.2464	15.1957	14.9559
1050	ENSMUSG00000008683	Rps15a	0.0659412	0.804137	13.9493	13.6937	13.6644	13.9427	13.7246	13.4111
1051	ENSMUSG00000008690	Ncaph2	-0.184498	0.385969	13.1493	12.9495	13.0072	13.2535	13.3484	13.0488
1052	ENSMUSG00000008730	Hipk1	0.133916	0.681528	10.9513	10.8449	10.8146	10.518	10.5693	11.0616
1053	ENSMUSG00000008734	Gprc5b	1.02339	0.000895416	9.48855	9.82337	9.06354	8.19414	8.71918	8.46995
1054	ENSMUSG00000008763	Man1a2	0.662041	0.0232021	11.0681	11.2906	10.7839	10.1515	10.3556	10.6542
1055	ENSMUSG00000008822	Acyp1	-1.17641	0.0459103	7.45736	6.5666	7.68311	8.58324	8.4339	8.36926
1056	ENSMUSG00000008843	Cldn13	0.630704	0.699028	5.59551	4.29419	6.38234	4.92396	4.56565	5.5796
1057	ENSMUSG00000008855	Hdac5	-1.21017	2.9662e-14	11.8416	11.657	11.8939	13.0619	13.1458	12.8009
1058	ENSMUSG00000008859	Rala	0.605213	0.000297915	10.9792	11.1551	10.9888	10.4554	10.5505	10.3025
1059	ENSMUSG00000008892	Vdac3	-0.471959	0.00563469	11.9802	12.2953	12.1662	12.6435	12.587	12.6425
1060	ENSMUSG00000008958	Vps72	0.209633	0.177701	11.8304	11.7702	11.8808	11.6211	11.7368	11.4865
1061	ENSMUSG00000008976	Gabpa	0.446459	0.0854213	10.2442	10.6119	10.3412	9.68322	9.94994	10.2073
1062	ENSMUSG00000008999	Bmp7	-2.60102	3.90475e-59	10.4154	10.3769	10.1407	12.8336	12.8237	13.0703
1063	ENSMUSG00000009013	Dynll1	0.0619649	0.783891	13.4126	13.254	13.3247	13.3574	13.2796	13.1666
1064	ENSMUSG00000009030	Pdcl	0.965256	3.05071e-05	10.0134	10.4431	10.0517	9.12283	9.3814	9.14901
1065	ENSMUSG00000009035	Tmem184b	-0.312883	0.162497	11.5196	11.4139	11.4373	11.7947	11.8127	11.7007
1066	ENSMUSG00000009073	Nf2	-0.10484	0.636261	12.1392	12.1071	11.9899	12.1151	11.9722	12.429
1067	ENSMUSG00000009075	Cabp7	4.43717	#N/A	4.02393	2	2	2	2	2
1068	ENSMUSG00000009076	Zmat5	-0.716302	0.0398996	8.62797	8.20411	8.78209	9.33552	9.28647	9.17658
1069	ENSMUSG00000009079	Ewsr1	0.162199	0.302607	13.6635	13.623	13.8547	13.4361	13.5179	13.6986
1070	ENSMUSG00000009090	Ap1b1	-0.636942	0.00128325	12.1431	11.896	12.3524	12.7453	12.8797	12.7056
1071	ENSMUSG00000009092	Derl3	-0.678111	0.662661	6.50489	2	6.03651	6.07162	6.72126	6.26124
1072	ENSMUSG00000009097	Tbx1	0.176858	0.938715	4.32498	2	5.12185	4.38326	4.12646	3.9026
1073	ENSMUSG00000009108	Gnat2	-0.649088	0.851397	5.01391	2	4.96643	5.52893	5.04454	4.31725
1074	ENSMUSG00000009112	Bcl2l13	0.111068	0.585305	12.1056	12.1616	11.8694	12.0139	12.0201	11.7735
1075	ENSMUSG00000009145	Dqx1	1.07985	0.348273	5.50847	5.72273	4.44499	3.96321	4.62741	4.51873
1076	ENSMUSG00000009207	Lnpk	0.364489	0.513596	8.78436	8.32761	8.5371	8.15198	8.06683	8.36926
1077	ENSMUSG00000009210	Prr29	-6.63611	0.0127074	2.30558	2	2	4.45436	4.12646	6.36947
1078	ENSMUSG00000009216	Fam163b	-1.80979	0.424834	4.2554	2	4.66317	4.92396	5.40346	6.06059
1079	ENSMUSG00000009246	Trpm5	-0.562337	0.795929	4.2554	5.94475	4.59405	5.9782	6.09216	4.16538
1080	ENSMUSG00000009248	Ascl2	1.34826	0.531074	4.2554	2	5.30603	3.86224	3.73579	2
1081	ENSMUSG00000009281	Rarres2	2.97035	3.03891e-10	8.86833	8.58765	8.19591	5.62452	6.27694	4.90182
1082	ENSMUSG00000009291	Pttg1ip	-0.421677	0.018086	11.3333	11.03	11.4648	11.8193	11.732	11.5612
1083	ENSMUSG00000009292	Trpm2	-5.21958	0.0778561	2.55761	2	2	4.64879	4.03826	5.42096
1084	ENSMUSG00000009293	Ube2g2	-0.62581	0.000344619	11.2094	11.1875	10.9296	11.6844	11.7507	11.7816
1085	ENSMUSG00000009350	Mpo	-2.44787	0.0563431	2.55761	4.72533	5.54455	6.44772	7.30687	7.02775
1086	ENSMUSG00000009356	Lpo	2.01904	#N/A	3.64305	2	2	2.61084	2	2
1087	ENSMUSG00000009376	Met	1.0757	0.0258422	7.47277	6.72143	6.55596	5.77098	6.07008	5.99451
1088	ENSMUSG00000009378	Slc16a12	-5.5216	2.09636e-32	2.95878	4.77761	4.96643	9.46384	9.65045	9.92195
1089	ENSMUSG00000009394	Syn2	-8.05404	0.000135299	2	2	2	5.46149	5.33106	6.29823
1090	ENSMUSG00000009406	Elk1	-0.468373	0.0152173	10.4721	10.3119	10.4232	10.8705	10.8653	10.8776
1091	ENSMUSG00000009418	Nav1	-2.08197	2.13967e-26	10.4702	10.966	10.226	12.5658	12.6104	12.8133
1092	ENSMUSG00000009470	Tnpo1	0.597933	0.00368298	13.0602	13.2025	12.7849	12.2126	12.2714	12.7415
1093	ENSMUSG00000009535	Rnmt	0.331307	0.183445	10.0408	9.99328	10.1752	9.59156	9.63924	9.96428
1094	ENSMUSG00000009545	Kcnq1	-5.82315	8.95727e-15	3.27232	2	4.09079	8.5713	8.54609	8.16915
1095	ENSMUSG00000009549	Srp14	-0.233078	0.209447	11.2429	11.4144	11.3877	11.7014	11.5526	11.4865
1096	ENSMUSG00000009551	6330409D20Rik	-3.88363	#N/A	2	2	2	3.36817	2.60209	2
1097	ENSMUSG00000009555	Cdk9	0.305607	0.0339613	11.921	11.8252	11.9895	11.701	11.6206	11.4955
1098	ENSMUSG00000009563	Tor2a	-0.197853	0.436531	10.4596	10.285	10.0629	10.4716	10.5772	10.3725
1099	ENSMUSG00000009566	Fpgs	-0.148435	0.48426	10.9893	10.9289	11.1382	11.2442	11.2225	11.0324
1100	ENSMUSG00000009569	Mrtfb	0.409163	0.0602071	10.9643	11.4278	11.0262	10.5719	10.6818	10.9571
1101	ENSMUSG00000009575	Cbx5	0.534634	0.00662536	13.8559	14.0489	13.7064	13.2306	13.2556	13.5235
1102	ENSMUSG00000009585	Apobec3	-2.1256	8.57156e-07	5.82897	6.82443	6.80568	8.82377	8.64646	8.38653
1103	ENSMUSG00000009614	Sardh	-0.549776	0.364343	7.64589	9.1798	8.06793	9.33081	9.06442	8.45365
1104	ENSMUSG00000009621	Vav2	0.250142	0.358408	11.279	11.1588	11.1021	11.0441	11.0042	10.7289
1105	ENSMUSG00000009628	Tex15	2.79398	0.212926	4.83467	5.21687	3.31135	2.84054	2.33223	3.16668
1106	ENSMUSG00000009630	Ppp2cb	0.290343	0.0688332	11.6875	11.9649	11.804	11.5825	11.4749	11.5406
1107	ENSMUSG00000009633	G0s2	-1.88397	0.000739078	6.83805	7.35839	6.6945	9.1201	8.84476	8.50201
1108	ENSMUSG00000009640	Dmap1	-0.414779	0.129342	10.6004	10.5142	10.5427	10.9511	11.0807	10.8599
1109	ENSMUSG00000009646	Pla2g12b	0.2458	0.793908	6.81406	5.01389	6.83594	6.22182	5.80198	6.48626
1110	ENSMUSG00000009647	Mcu	0.00878479	0.988801	9.60851	10.3085	9.58158	9.83081	9.93322	9.83022
1111	ENSMUSG00000009654	Oit3	0.0438795	0.953339	7.26719	8.76969	8.05512	7.86282	8.26444	8.18405
1112	ENSMUSG00000009681	Bcr	0.0926933	0.708874	11.8416	11.6726	11.8966	11.69	11.7174	11.7344
1113	ENSMUSG00000009687	Fxyd5	-4.265	1.01919e-18	5.09581	4.92397	4.91066	9.19986	9.18743	8.75243
1114	ENSMUSG00000009731	Kcnd1	-0.146663	0.865503	7.31071	6.49033	6.72715	7.14014	6.89454	7.03872
1115	ENSMUSG00000009733	Tfcp2	0.174183	0.573304	9.58565	9.65366	9.6125	9.43995	9.34279	9.543
1116	ENSMUSG00000009734	Pou6f2	-3.92851	0.0208751	3.52974	2.98272	2	5.95386	5.08912	6.53356
1117	ENSMUSG00000009739	Pou6f1	-0.459041	0.652458	6.24257	5.98977	6.51914	7.11841	6.95602	5.63847
1118	ENSMUSG00000009741	Ubp1	0.529768	0.00782888	11.2921	11.249	11.0409	10.4939	10.6043	10.8821
1119	ENSMUSG00000009772	Nuak2	-2.26972	0.00449022	5.98757	5.55313	6.48136	8.13043	7.98071	8.58292
1120	ENSMUSG00000009828	Cilk1	0.385321	0.311473	10.1974	9.90202	10.1347	9.60138	9.50172	9.95562
1121	ENSMUSG00000009863	Sdhb	-1.23139	3.24963e-17	12.1823	11.9379	12.1047	13.4891	13.358	13.0452
1122	ENSMUSG00000009876	Cox4i2	-1.54777	0.000379622	7.16654	6.68082	7.38874	8.43731	8.82512	8.5904
1123	ENSMUSG00000009894	Snap47	-0.236463	0.119536	11.804	11.7783	11.5726	11.9672	12.0136	11.892
1124	ENSMUSG00000009900	Wnt3a	5.04446	0.0667166	4.57392	4.29419	5.21688	2.33751	2.33223	2
1125	ENSMUSG00000009905	Kdsr	0.496059	0.225877	8.28371	8.89627	8.75859	8.02926	7.91412	8.51777
1126	ENSMUSG00000009907	Vps4b	0.658456	0.0177124	10.5062	10.5865	10.5312	9.78327	9.74925	10.0975
1127	ENSMUSG00000009927	Rps25	-0.046282	0.858243	13.9873	13.794	13.9832	14.1655	13.8991	13.8243
1128	ENSMUSG00000009941	Nxf2	1.98256	#N/A	3.7481	2	4.27873	3.03864	2.60209	2
1129	ENSMUSG00000009995	Taz	-0.371497	0.301551	9.64977	9.27607	9.48704	10.0067	9.72297	9.80153
1130	ENSMUSG00000010021	Kif19a	-2.12273	0.358363	3.93772	2	3.87465	5.02085	3.84381	5.92527
1131	ENSMUSG00000010025	Aldh3a2	0.158363	0.63882	10.0472	10.1833	9.89708	9.96012	9.578	10.0843
1132	ENSMUSG00000010045	Tmem115	-0.462935	0.0947412	10.8443	10.6562	10.6689	11.2246	11.2644	11.067
1133	ENSMUSG00000010047	Hyal2	-0.297339	0.0924226	11.9929	11.7147	11.8035	12.2505	12.239	11.9007
1134	ENSMUSG00000010048	Ifrd2	-0.273228	0.228851	11.0231	10.9289	11.1764	11.3673	11.1979	11.3843
1135	ENSMUSG00000010051	Hyal1	0.0659197	0.953073	5.98757	5.72273	6.31949	6.30112	6.00176	5.48652
1136	ENSMUSG00000010054	Tusc2	-0.732371	0.000147603	10.016	10.0959	9.91136	10.8015	10.7053	10.7118
1137	ENSMUSG00000010057	Nprl2	-0.206354	0.582096	8.8857	9.00443	9.07627	9.32608	9.32892	8.88901
1138	ENSMUSG00000010064	Slc38a3	-0.299293	0.766369	6.26044	5.82564	6.18492	6.48216	6.38817	6.27985
1139	ENSMUSG00000010066	Cacna2d2	-2.66695	1.01261e-43	11.2613	10.5929	11.0287	13.4201	13.6972	13.8095
1140	ENSMUSG00000010067	Rassf1	-0.223557	0.692353	8.50595	8.99618	8.41716	9.06437	8.83497	8.73567
1141	ENSMUSG00000010080	Epn3	-3.12432	1.49277e-15	7.69927	6.83681	6.36169	10.1011	10.1288	10.2574
1142	ENSMUSG00000010086	Rnf112	5.57878	1.20733e-05	5.98757	6.34197	6.83594	2	3.19836	2
1143	ENSMUSG00000010095	Slc3a2	-0.0456701	0.876717	11.791	11.7034	11.7523	11.8884	11.9188	11.5497
1144	ENSMUSG00000010097	Nxf1	-0.045427	0.829206	11.8512	12.1261	12.0314	12.0121	12.0532	12.0915
1145	ENSMUSG00000010110	Stx5a	0.0950901	0.763142	10.3709	10.3317	10.0867	10.1845	10.1812	10.1566
1146	ENSMUSG00000010122	Slc47a1	-4.22883	2.43252e-09	3.27232	6.30683	4.09079	8.90534	9.23035	9.44539
1147	ENSMUSG00000010136	Pifo	-5.21048	#N/A	2	2	2	4.52213	2.60209	2
1148	ENSMUSG00000010142	Tnfrsf13b	-6.23024	0.021417	2.30558	2	2	4.52213	3.73579	5.87719
1149	ENSMUSG00000010154	Spire2	2.32154	2.86765e-13	9.92371	9.67793	10.1055	7.71864	7.7293	7.36933
1150	ENSMUSG00000010175	Prox1	-1.78894	2.07096e-10	7.92331	9.00443	8.63928	10.1923	10.2429	10.6244
1151	ENSMUSG00000010277	2610507B11Rik	-0.507143	3.48021e-05	13.5158	13.6002	13.2866	13.9703	13.9386	14.0314
1152	ENSMUSG00000010290	AI597479	0.262858	0.356941	9.84744	9.88126	9.70351	9.58959	9.43635	9.62171
1153	ENSMUSG00000010307	Tmem86a	-0.456773	0.259509	8.08245	8.04258	8.2698	8.64154	8.64273	8.46589
1154	ENSMUSG00000010342	Tex14	-3.83227	#N/A	2.30558	2	2	4.14614	2.60209	2
1155	ENSMUSG00000010358	Ifi35	-0.0780411	0.966294	5.6776	3.78261	6.80568	6.35785	6.37022	4.38758
1156	ENSMUSG00000010362	Rdm1	0.118213	0.827482	8.90287	8.75346	9.27981	9.04146	8.90211	8.66663
1157	ENSMUSG00000010376	Nedd8	-0.0985882	0.69017	12.1019	12.0182	11.9991	12.2583	11.9781	12.1666
1158	ENSMUSG00000010392	Gosr1	-0.0731562	0.841304	10.0727	9.64137	9.7259	9.76416	9.84335	10.071
1159	ENSMUSG00000010406	Mrpl52	-0.267947	0.477185	10.9786	10.7597	11.1435	11.4501	11.3157	10.8852
1160	ENSMUSG00000010453	Kansl3	-0.21728	0.197653	11.2647	11.1686	11.1098	11.4392	11.335	11.4225
1161	ENSMUSG00000010461	Eya4	1.39188	0.0844832	5.87609	7.25154	5.95615	5.06695	5.29345	5.28015
1162	ENSMUSG00000010476	Ebf3	1.1088	0.278861	7.97292	5.94475	7.23829	6.35785	5.82852	6.36947
1163	ENSMUSG00000010492	Uckl1os	-0.714188	0.758731	4.51559	5.05684	3.87465	5.19703	5.13237	5.20423
1164	ENSMUSG00000010505	Myt1	5.09385	0.25693	4.02393	2	3.47409	2	2	2
1165	ENSMUSG00000010517	Faf1	-0.0682121	0.751471	11.3464	11.4651	11.2934	11.4332	11.4094	11.4719
1166	ENSMUSG00000010529	Gm266	0.274974	0.75362	6.59214	7.84236	7.82561	7.60604	7.04923	7.03872
1167	ENSMUSG00000010538	Tsacc	-1.52522	0.447894	4.51559	2	5.07188	5.59335	5.29345	5.99451
1168	ENSMUSG00000010554	Mettl16	0.750401	8.85143e-07	11.0341	10.9354	10.9383	10.2769	10.0895	10.2899
1169	ENSMUSG00000010607	Pigyl	0.668769	0.0248202	9.55702	9.5746	9.49654	8.92737	8.81852	8.88901
1170	ENSMUSG00000010608	Rbm25	0.389848	0.168877	11.0839	11.4986	11.3211	10.6778	10.7372	11.2732
1171	ENSMUSG00000010609	Psen2	-1.63278	2.37457e-15	8.40112	8.50865	8.52787	10.119	10.0576	10.1273
1172	ENSMUSG00000010651	Acaa1b	-1.16886	0.564418	4.32498	3.43741	5.34862	5.5615	6.29609	4.31725
1173	ENSMUSG00000010660	Plcd1	-1.70276	2.25577e-13	8.98308	9.38541	8.71449	10.8435	10.8005	10.5959
1174	ENSMUSG00000010663	Fads1	0.234291	0.360136	12.3684	12.3592	12.4325	12.0231	12.0553	12.3564
1175	ENSMUSG00000010721	Lmbr1	-0.623507	0.18974	7.54015	7.63835	7.56163	8.31846	8.22002	8.02766
1176	ENSMUSG00000010751	Tnfrsf22	-1.08293	0.10059	6.51981	6.17659	5.87105	6.868	6.80383	7.846
1177	ENSMUSG00000010755	Cars	0.117683	0.572443	11.0618	11.0408	11.1933	10.9418	10.9881	11.0165
1178	ENSMUSG00000010760	Phlda2	0.505598	0.472601	8.48331	6.83681	8.67319	7.7822	7.49259	7.80161
1179	ENSMUSG00000010797	Wnt2	1.69216	7.40598e-16	12.8046	12.5097	12.3139	10.4036	11.1806	10.9123
1180	ENSMUSG00000010803	Gabra1	7.20949	0.0128545	4.18229	2	6.20824	2	2	2
1181	ENSMUSG00000010825	Grid2ip	-1.86932	0.0227418	4.88161	6.23385	4.44499	6.73153	7.17865	7.49412
1182	ENSMUSG00000010830	Kdelr3	-1.6868	5.17529e-06	7.51803	7.49738	7.21546	9.1036	9.02767	9.11053
1183	ENSMUSG00000010911	Apip	-0.387251	0.173856	8.94767	9.02079	8.83173	9.31895	9.31256	9.32957
1184	ENSMUSG00000010914	Pdhx	-0.777015	0.000134254	9.78245	9.89612	9.84038	10.8032	10.4343	10.5829
1185	ENSMUSG00000010936	Vac14	-0.348771	0.072034	11.5038	11.2996	11.4696	11.8041	11.8876	11.6217
1186	ENSMUSG00000011096	Akt1s1	-0.353846	0.1245	11.9909	11.836	11.9861	12.3697	12.5424	11.8909
1187	ENSMUSG00000011114	Tbrg1	-0.361742	0.0302288	12.6205	12.7193	12.7036	13.1062	13.1099	12.9044
1188	ENSMUSG00000011118	Panx3	0	#N/A	2	2	2	2	2	2
1189	ENSMUSG00000011148	Adssl1	-4.58839	4.30549e-70	7.18537	6.73471	6.6945	11.4243	11.3967	11.477
1190	ENSMUSG00000011158	Brf1	0.153089	0.532563	10.3832	10.2157	10.3333	10.1753	10.114	10.1889
1191	ENSMUSG00000011171	Vipr2	-1.09951	0.668402	2.7721	4.14296	2.67147	3.86224	5.08912	2
1192	ENSMUSG00000011179	Odc1	0.728312	6.70789e-09	14.2547	14.2336	14.0401	13.5022	13.2725	13.5631
1193	ENSMUSG00000011254	Thg1l	0.371197	0.317277	9.87959	9.05825	9.7618	9.29494	9.07831	9.33403
1194	ENSMUSG00000011256	Adam19	-0.858415	6.73223e-07	10.7463	10.8983	10.6143	11.4877	11.6654	11.6833
1195	ENSMUSG00000011257	Pabpc4	-0.457393	0.00360114	13.1692	13.1512	13.3513	13.6678	13.7502	13.6312
1196	ENSMUSG00000011263	Exoc3l2	-2.68148	6.42993e-14	7.46508	8.76969	7.26077	10.7379	10.6954	10.543
1197	ENSMUSG00000011267	Zfp296	-1.58759	0.430754	3.84602	2	3.12789	3.21279	3.84381	5.0823
1198	ENSMUSG00000011305	Plin5	-1.75881	0.523546	2.7721	2	3.31135	4.64879	3.61902	2
1199	ENSMUSG00000011306	Sugp1	-0.0466489	0.861639	10.8317	11.1754	10.8976	11.0135	11.0951	10.9563
1200	ENSMUSG00000011382	Dhdh	-0.126727	0.83404	7.6927	7.68701	7.87015	8.04086	7.60432	7.94844
1201	ENSMUSG00000011427	Zfp790	0.297381	0.602321	7.83663	8.33199	7.75612	7.25412	7.66448	8.0817
1202	ENSMUSG00000011589	Fsd1	1.05807	0.0125721	9.322	7.97141	9.23511	7.91417	8.19983	7.55651
1203	ENSMUSG00000011658	Fuz	-0.0446392	0.957818	7.49558	7.76677	6.96474	7.35976	7.88912	7.11326
1204	ENSMUSG00000011751	Sptbn4	-1.25261	0.499435	4.10528	4.29419	4.85265	5.59335	5.7193	5.28015
1205	ENSMUSG00000011752	Pgam1	-0.294574	0.0216118	13.6708	13.7713	13.6681	14.0682	13.9143	14.0096
1206	ENSMUSG00000011831	Evi5	1.23966	0.00201498	9.18837	9.72861	9.71779	7.88229	8.23498	8.75575
1207	ENSMUSG00000011832	Evi5l	0.275625	0.348824	9.54977	9.62541	9.37561	9.28278	9.41243	9.01933
1208	ENSMUSG00000011837	Snapc2	-0.0478519	0.884989	10.8707	10.5199	10.8914	10.931	10.9218	10.5735
1209	ENSMUSG00000011877	Git1	-0.409671	0.0043012	12.5657	12.5827	12.5861	12.988	13.0876	12.8798
1210	ENSMUSG00000011884	Gltp	0.22232	0.419874	10.8106	10.8022	10.3609	10.5589	10.3703	10.4183
1211	ENSMUSG00000011958	Bnip2	0.197736	0.568265	11.0426	11.3458	11.1214	10.9883	10.8938	11.0488
1212	ENSMUSG00000011960	Ccnt1	0.191425	0.496113	10.4489	10.1227	10.2303	9.95553	10.1721	10.1131
1213	ENSMUSG00000012017	Scarf2	1.14971	4.70638e-10	12.242	12.2373	12.1913	11.1801	11.2675	10.7221
1214	ENSMUSG00000012076	Brms1l	0.345497	0.300584	9.44038	9.54851	9.46301	9.0672	9.0504	9.29339
1215	ENSMUSG00000012114	Med15	-0.268251	0.109149	11.1507	10.9716	11.2071	11.3839	11.3861	11.3725
1216	ENSMUSG00000012117	Dhdds	-0.331307	0.198671	10.87	10.8472	10.8841	11.2423	11.2559	11.0896
1217	ENSMUSG00000012123	Crybg2	-0.650406	0.597496	4.88161	4.43105	6.34074	5.71417	5.66142	6.5943
1218	ENSMUSG00000012126	Ubxn11	0.416288	0.648747	5.98757	6.86124	6.27601	5.79857	6.17722	6.08196
1219	ENSMUSG00000012187	Mogat1	5.82763	0.277773	2	5.17849	2	2	2	2
1220	ENSMUSG00000012296	Tjap1	0.00672939	0.986955	11.056	10.9419	11.0237	11.0817	10.9695	10.9491
1221	ENSMUSG00000012396	Nanog	1.80856	0.588583	4.51559	4.22055	4.18782	3.86224	2.82934	2
1222	ENSMUSG00000012405	Rpl15	-0.161755	0.414468	14.3776	14.2281	14.3185	14.6106	14.4233	14.3681
1223	ENSMUSG00000012422	Tmem167	0.486891	0.0068585	10.9786	11.1377	10.8512	10.5002	10.4049	10.6125
1224	ENSMUSG00000012429	Mplkip	0.20162	0.598874	9.20691	8.66948	9.07943	8.83713	8.88324	8.68071
1225	ENSMUSG00000012443	Kif11	0.62733	0.0308559	10.8502	11.3479	11.0147	10.2547	10.4643	10.6362
1226	ENSMUSG00000012483	Rpa3	-0.0784634	0.840516	9.85186	9.77757	9.81782	10.0942	9.65045	9.90407
1227	ENSMUSG00000012519	Mlkl	-3.45711	#N/A	2.30558	2	2	2.61084	2.60209	3.58106
1228	ENSMUSG00000012535	Tnpo3	0.58674	0.000280746	11.6078	12.0371	11.7558	11.1944	11.3163	11.1609
1229	ENSMUSG00000012609	Ttll5	-0.604069	0.0299811	9.33259	9.59295	9.30976	10.0258	9.76651	10.2278
1230	ENSMUSG00000012640	Zfp715	0.538628	0.565509	7.80045	8.58031	7.38874	7.35047	7.4333	7.64532
1231	ENSMUSG00000012777	Acp4	3.82026	#N/A	2.30558	2	3.47409	2	2	2
1232	ENSMUSG00000012819	Cdh23	1.85532	0.0409272	7.04809	5.72273	6.95098	4.64879	5.08912	5.1241
1233	ENSMUSG00000012848	Rps5	-0.0310997	0.926161	15.4031	14.9935	15.2694	15.4634	15.3208	14.9593
1234	ENSMUSG00000013033	Adgrl1	0.593624	0.00116403	12.172	12.2344	11.9046	11.4534	11.6282	11.4653
1235	ENSMUSG00000013076	Amotl1	-0.336916	0.0629932	12.2383	12.4017	12.0649	12.6095	12.5089	12.6141
1236	ENSMUSG00000013089	Etv5	-1.53959	5.06746e-12	9.37216	10.2192	9.63203	11.2892	11.3413	11.3329
1237	ENSMUSG00000013091	Tmem190	0.736863	0.822365	2.7721	2	3.31135	2.61084	2.82934	2
1238	ENSMUSG00000013150	Gfod2	0.524403	0.0532982	9.87814	9.93692	9.4484	8.99153	9.35425	9.37139
1239	ENSMUSG00000013155	Enkd1	-0.055702	0.8919	9.51112	9.41459	9.26599	9.41788	9.53634	9.41203
1240	ENSMUSG00000013160	Atp6v0d1	-0.452946	0.00402967	11.4454	11.5633	11.5624	11.9917	12.0769	11.8541
1241	ENSMUSG00000013236	Ptprs	-0.0362776	0.896368	13.2113	13.0905	13.052	13.104	13.3003	13.0511
1242	ENSMUSG00000013275	Slc41a1	-0.428554	0.0911641	9.78399	9.77918	9.56588	10.0561	9.96796	10.3659
1243	ENSMUSG00000013367	Iglon5	3.26248	3.05472e-15	8.48711	8.19933	8.78209	4.58685	5.66142	5.63847
1244	ENSMUSG00000013415	Igf2bp1	0.26183	0.177935	14.0155	13.8155	13.6662	13.4194	13.5854	13.7136
1245	ENSMUSG00000013418	B4galnt2	0.0220567	0.998582	3.64305	2	5.07188	3.86224	4.95101	2
1246	ENSMUSG00000013419	Zfp651	-0.368585	0.0633627	10.3678	10.0985	10.2971	10.6853	10.584	10.608
1247	ENSMUSG00000013465	Nelfb	0.0619268	0.777824	12.0154	12.0107	11.949	11.9099	12.0348	11.8393
1248	ENSMUSG00000013483	Card14	-2.0686	0.305956	3.84602	2	5.02012	5.23791	5.77494	6.35199
1249	ENSMUSG00000013495	Tmem175	-0.895953	0.00353949	8.19358	7.92581	8.54628	9.03277	9.20526	9.14647
1250	ENSMUSG00000013523	Bcas1	0.971537	0.491021	5.44738	4.96963	4.44499	2.61084	3.35262	5.28015
1251	ENSMUSG00000013539	Tango2	-1.01193	0.00027683	8.79972	8.51251	9.06673	9.8408	9.85792	9.74404
1252	ENSMUSG00000013584	Aldh1a2	3.25096	2.46548e-12	8.82695	9.13541	8.87971	5.46149	6.57218	4.80234
1253	ENSMUSG00000013593	Ndufs2	-1.03794	1.35536e-16	12.8742	12.697	12.8302	13.9226	13.86	13.7306
1254	ENSMUSG00000013611	Snx31	2.59183	0.192258	3.93772	5.77511	4.59405	4.05757	2.33223	2
1255	ENSMUSG00000013622	Atraid	-0.327933	0.211967	9.44429	9.7035	9.45816	9.79872	9.83683	9.95996
1256	ENSMUSG00000013629	Cad	-0.3403	0.0579481	13.8021	13.7912	13.617	14.0828	14.2489	13.8837
1257	ENSMUSG00000013646	Sh3bp5l	-0.0804426	0.839632	10.9116	10.7935	10.9366	10.9815	11.0158	10.8859
1258	ENSMUSG00000013662	Atad1	0.379186	0.140378	10.3523	10.611	10.3373	9.92613	10.0674	10.179
1259	ENSMUSG00000013663	Pten	0.906113	0.00160558	10.1358	10.5295	10.417	9.11462	9.39033	9.81116
1260	ENSMUSG00000013698	Pea15a	-1.25585	2.36186e-22	11.6099	11.7954	11.6102	12.9848	12.8403	12.9592
1261	ENSMUSG00000013701	Timm23	-0.453908	0.0129828	11.4439	11.11	11.194	11.8815	11.586	11.6448
1262	ENSMUSG00000013707	Tnfaip8l2	1.16644	0.80369	4.2554	2	4.85265	3.96321	3.35262	2
1263	ENSMUSG00000013736	Trnt1	0.0231912	0.96242	9.13609	9.01807	9.15037	8.97046	9.01617	9.23736
1264	ENSMUSG00000013787	Ehmt2	0.468227	0.00283586	13.7313	13.6944	13.6985	13.2834	13.4463	12.9467
1265	ENSMUSG00000013822	Elof1	-0.0604489	0.826932	11.6316	11.4456	11.4858	11.6686	11.7147	11.3396
1266	ENSMUSG00000013833	Med16	-0.169206	0.491618	11.9516	11.7511	11.8328	12.0513	12.1322	11.8521
1267	ENSMUSG00000013846	St3gal1	-0.293868	0.157258	11.2552	10.8879	11.0006	11.2003	11.4148	11.423
1268	ENSMUSG00000013858	Tmem259	-0.79386	1.48196e-07	11.9751	11.6492	12.0436	12.7682	12.7678	12.528
1269	ENSMUSG00000013878	Rnf170	0.359156	0.645861	7.41809	7.18535	7.36818	6.90655	6.83033	7.17422
1270	ENSMUSG00000013921	Clip3	2.4254	1.91905e-43	12.0649	12.1074	12.149	9.23562	9.92863	9.80796
1271	ENSMUSG00000013936	Myl2	-9.83898	2.24075e-11	7.65267	5.66838	6.57402	16.7972	16.4192	16.6894
1272	ENSMUSG00000013973	Dedd	0.219666	0.726509	8.06222	8.41685	7.64943	7.96984	8.00418	7.5717
1273	ENSMUSG00000013997	Nit1	-0.221234	0.52757	9.46755	9.45528	9.33646	9.67207	9.51811	9.72549
1274	ENSMUSG00000014030	Pax5	5.07623	0.244178	4.10528	2	3.31135	2	2	2
1275	ENSMUSG00000014039	Prdm15	0.137499	0.751618	9.2545	9.59113	9.3285	9.14449	9.47676	9.13885
1276	ENSMUSG00000014074	Rnf168	0.672845	0.00180941	10.3699	10.4441	10.5032	9.64573	9.67807	9.96284
1277	ENSMUSG00000014075	Dynlt2b	-0.0707466	0.935225	7.68611	6.76092	7.83313	7.85627	7.40712	7.3866
1278	ENSMUSG00000014077	Chp1	-0.0531969	0.844851	11.2915	11.4893	11.3137	11.311	11.3063	11.6217
1279	ENSMUSG00000014158	Trpv4	-1.80777	0.165772	3.40676	2.31504	5.26214	5.02085	6.0249	5.90143
1280	ENSMUSG00000014164	Klhl3	-1.06408	0.0254685	7.09863	7.195	6.71092	8.14662	7.93869	8.0817
1281	ENSMUSG00000014177	Tvp23b	0.404118	0.155276	9.66494	9.3959	9.48942	8.99749	9.11381	9.23736
1282	ENSMUSG00000014195	Dnajc7	0.168993	0.572784	11.0263	11.7902	11.6807	11.3639	11.3613	11.3768
1283	ENSMUSG00000014198	Zfp385c	-6.06263	0.0856966	2	2	2	2.84054	4.851	3.80318
1284	ENSMUSG00000014226	Cacybp	0.538531	0.00800049	10.998	11.4746	11.1786	10.7809	10.5405	10.7465
1285	ENSMUSG00000014232	Cluap1	0.682579	0.261241	7.53281	7.46586	7.85546	6.5966	7.17865	7.04961
1286	ENSMUSG00000014243	Zswim7	0.352163	0.646855	8.41315	8.65208	8.69811	8.17321	8.15859	8.39082
1287	ENSMUSG00000014245	Pigl	-1.09656	0.00240122	7.95657	8.29659	8.0357	9.12555	9.25991	9.17906
1288	ENSMUSG00000014294	Ndufa2	-0.146693	0.621995	11.2071	10.6209	11.0081	11.3211	11.1107	10.8684
1289	ENSMUSG00000014301	Pam16	-1.06771	0.0028721	9.3347	8.14065	9.33646	10.1217	9.95747	10.2012
1290	ENSMUSG00000014303	Glis2	0.0798988	0.760811	11.1363	11.3784	10.9225	10.992	11.1107	11.1286
1291	ENSMUSG00000014313	Cox6c	-0.696336	0.00943847	11.3007	10.9151	11.2329	12.0741	11.4968	11.9319
1292	ENSMUSG00000014329	Bicc1	2.43097	1.03578e-17	10.5568	10.7799	10.6647	7.90151	8.23993	8.5488
1293	ENSMUSG00000014349	Ube2z	-0.250064	0.0899087	12.8082	12.6071	12.7036	12.9516	12.9535	12.9705
1294	ENSMUSG00000014353	Tmem87b	-0.0410932	0.930789	8.80277	9.24624	8.78984	8.87973	8.94822	9.16662
1295	ENSMUSG00000014355	Anapc1	0.33368	0.0214164	13.3744	13.6572	13.3254	12.9925	13.1771	13.2007
1296	ENSMUSG00000014361	Mertk	-0.640945	0.409174	6.41202	6.84907	6.20824	6.868	6.64864	7.67374
1297	ENSMUSG00000014402	Tsg101	-0.170873	0.362171	11.2373	11.1144	11.3063	11.3685	11.3771	11.4293
1298	ENSMUSG00000014418	Hps5	0.325511	0.249461	9.61373	9.61287	9.72387	9.03277	9.3814	9.52361
1299	ENSMUSG00000014426	Map3k4	1.16728	1.12393e-19	12.8167	12.5721	12.7245	11.5519	11.536	11.5372
1300	ENSMUSG00000014444	Piezo1	-0.967667	1.31465e-09	12.6752	12.5189	12.2224	13.4406	13.6087	13.2875
1301	ENSMUSG00000014453	Blk	0.947323	0.382095	7.08866	5.96744	6.62689	5.4956	6.04767	5.60934
1302	ENSMUSG00000014470	Rnf166	-1.09913	9.82821e-05	9.73371	8.89922	9.4918	10.4886	10.6626	10.3638
1303	ENSMUSG00000014496	Ankrd28	0.410477	0.0504088	10.7478	10.8571	10.5733	10.1819	10.1991	10.5526
1304	ENSMUSG00000014498	Ankrd52	-0.00152046	0.998131	12.0191	12.1992	11.8168	12.0595	12.0571	11.9462
1305	ENSMUSG00000014503	Pkd2l2	0.234508	0.844701	6.94136	7.26076	7.2829	6.62769	6.76313	7.33414
1306	ENSMUSG00000014504	Srp19	0.197795	0.606633	9.84596	10.1966	9.84782	9.94013	9.61468	9.75573
1307	ENSMUSG00000014547	Wdfy2	0.0867437	0.788754	10.2124	9.85565	9.94471	9.87845	9.80377	10.0816
1308	ENSMUSG00000014550	Rbsn	0.644696	0.0178108	10.3842	10.1478	10.1766	9.54141	9.57995	9.67013
1309	ENSMUSG00000014551	Mrps25	-0.41069	0.0634506	10.2786	10.276	10.0485	10.6843	10.3748	10.7574
1310	ENSMUSG00000014554	Dguok	-0.209782	0.629222	9.25227	9.10504	9.41872	9.51047	9.64112	9.23736
1311	ENSMUSG00000014592	Camta1	-1.15702	7.17281e-07	8.93103	8.83898	8.48555	9.88329	9.95897	9.90256
1312	ENSMUSG00000014599	Csf1	1.69405	3.33111e-12	10.3781	10.1882	10.0914	8.50586	8.62012	8.49406
1313	ENSMUSG00000014601	Strip1	-0.0944488	0.62502	11.7845	11.5256	11.6776	11.6987	11.7956	11.7861
1314	ENSMUSG00000014602	Kif1a	1.04741	0.00560113	8.57184	8.25571	8.92264	7.41428	7.64967	7.65248
1315	ENSMUSG00000014603	Alx3	5.80833	4.96397e-37	9.89825	10.2026	10.0191	2.84054	5.25484	4.51873
1316	ENSMUSG00000014606	Slc25a11	-0.804244	4.72993e-08	12.0541	11.8225	11.9572	12.7144	12.5897	12.9291
1317	ENSMUSG00000014633	Cmc2	-0.797502	0.000413535	9.47904	9.55975	9.73996	10.3787	10.4148	10.3789
1318	ENSMUSG00000014668	Chfr	-0.12131	0.614782	10.3709	10.5122	10.427	10.5809	10.5772	10.5177
1319	ENSMUSG00000014704	Hoxa2	0.85388	0.737301	3.84602	5.21687	4.27873	2	4.56565	4.08299
1320	ENSMUSG00000014748	Tex261	-0.53738	0.000617559	11.1387	11.2327	11.0864	11.6936	11.6315	11.7444
1321	ENSMUSG00000014763	Fam120b	0.701115	0.00347353	9.85774	10.0843	9.75191	9.17112	9.2378	9.21336
1322	ENSMUSG00000014767	Tbp	0.105353	0.747832	9.52597	9.34915	9.42868	9.25317	9.23035	9.49602
1323	ENSMUSG00000014769	Psmb1	-0.122835	0.642083	12.9917	12.8635	13.003	13.267	13.223	12.6668
1324	ENSMUSG00000014773	Dll1	-2.7977	4.24353e-06	5.38359	5.96744	6.64409	8.76554	8.8152	8.84595
1325	ENSMUSG00000014776	Nol3	-1.23508	0.160586	5.38359	5.72273	6.16122	7.11841	7.13678	6.56425
1326	ENSMUSG00000014778	Fhod1	0.166576	0.597996	10.2419	10.2415	10.3544	10.2156	10.1773	9.93375
1327	ENSMUSG00000014782	Plekhg4	0.112139	0.964473	5.24686	4.61471	5.07188	4.45436	5.04454	5.1241
1328	ENSMUSG00000014786	Slc9a5	-0.0516027	0.949483	8.30539	8.16539	7.409	8.11953	8.27894	7.73572
1329	ENSMUSG00000014791	Elmo3	-0.192429	0.783224	7.20395	7.62415	6.85083	7.68946	7.4333	7.18413
1330	ENSMUSG00000014813	Stc1	-3.56042	1.29465e-11	4.39135	4.92397	4.36425	7.95765	7.91412	7.85223
1331	ENSMUSG00000014837	4931428F04Rik	0.441059	0.243226	8.99113	8.42097	8.96774	8.20449	8.49316	8.42467
1332	ENSMUSG00000014846	Tppp3	-2.27302	3.31526e-11	7.15703	7.13614	6.64409	9.31418	9.42987	8.91901
1333	ENSMUSG00000014850	Msh3	0.581213	0.071817	9.03331	9.19669	9.37818	8.4677	8.6125	8.79833
1334	ENSMUSG00000014856	Tmem208	-0.398518	0.116634	9.89825	9.81245	9.73194	10.3299	10.2589	10.0345
1335	ENSMUSG00000014859	E2f4	-0.145917	0.427488	12.1007	12.1144	12.1561	12.4423	12.2043	12.1452
1336	ENSMUSG00000014867	Surf4	-0.359706	0.00379775	13.7815	13.7973	13.6476	14.0883	14.0976	14.124
1337	ENSMUSG00000014873	Surf2	-0.358864	0.186317	9.04367	9.17737	9.0015	9.55967	9.30549	9.42254
1338	ENSMUSG00000014905	Dnajb9	-0.440098	0.245053	8.35613	8.50865	8.07428	8.94908	8.79852	8.49804
1339	ENSMUSG00000014907	Naf1	0.532968	0.0392317	10.155	10.0449	9.92901	9.35656	9.53029	9.64523
1340	ENSMUSG00000014932	Yes1	0.444484	0.520805	8.62108	8.18488	8.52787	7.86282	7.87008	8.27963
1341	ENSMUSG00000014956	Ppp1cb	0.184217	0.494961	12.477	12.4288	12.5361	12.1433	12.2375	12.4883
1342	ENSMUSG00000014959	Gorasp2	-0.42251	0.000479131	12.4863	12.5802	12.53	12.9682	12.8917	13.0026
1343	ENSMUSG00000014980	Tsen15	-0.201618	0.483065	9.86506	9.71695	9.83852	10.1066	9.85631	10.0522
1344	ENSMUSG00000015002	Efr3a	0.0959238	0.749316	10.4557	10.8037	10.328	10.351	10.5244	10.4638
1345	ENSMUSG00000015013	Trappc2l	-0.677155	0.020055	9.14814	9.47718	9.347	10.1448	9.93169	9.92491
1346	ENSMUSG00000015016	Acsf3	-0.481825	0.137409	9.9501	9.78238	9.9925	10.3463	10.5801	10.2242
1347	ENSMUSG00000015023	Ddx19a	-0.0825436	0.630361	11.6397	11.7042	11.6298	11.7535	11.7654	11.7028
1348	ENSMUSG00000015027	Galns	-1.25646	1.01676e-05	8.67203	8.25571	8.48077	9.62662	9.79875	9.74906
1349	ENSMUSG00000015053	Gata2	-3.95754	1.59205e-35	5.80482	6.4098	6.62689	10.3626	10.1953	10.0345
1350	ENSMUSG00000015083	C8g	-0.200341	0.865819	5.3506	6.17659	5.12185	5.82564	5.90532	5.69504
1351	ENSMUSG00000015087	Rabl6	0.153862	0.426007	12.3194	12.1349	12.1832	12.2013	12.0122	11.9581
1352	ENSMUSG00000015092	Edf1	-0.30711	0.137691	12.5405	12.3807	12.6093	12.9223	12.9263	12.5864
1353	ENSMUSG00000015093	Clic3	-0.218192	0.95768	5.24686	2	3.47409	3.36817	4.43357	4.80234
1354	ENSMUSG00000015094	Npdc1	-2.02695	1.90052e-05	6.63387	6.52132	7.57963	9.19467	9.17714	8.46589
1355	ENSMUSG00000015095	Fbxw5	-0.636889	0.00484203	11.0374	10.484	10.8976	11.5443	11.4822	11.3484
1356	ENSMUSG00000015112	Slc25a13	-0.53649	0.0267577	10.6664	11.2368	10.5242	11.4501	11.2849	11.3972
1357	ENSMUSG00000015120	Ube2i	0.496718	9.32573e-06	12.9035	12.8608	12.7827	12.3298	12.3099	12.4186
1358	ENSMUSG00000015126	Tsr3	-0.00735616	0.98489	10.0041	10.0382	10.1558	10.2459	10.059	9.89805
1359	ENSMUSG00000015127	Unkl	1.10372	0.0332278	8.27495	7.68701	8.12417	7.15088	7.36242	6.12377
1360	ENSMUSG00000015133	Lrrk1	-0.956734	0.00285196	9.90821	10.2227	9.16831	10.8032	10.8645	10.6807
1361	ENSMUSG00000015134	Aldh1a3	-0.934197	0.783825	4.62998	2	4.27873	5.19703	4.20958	4.69549
1362	ENSMUSG00000015143	Actn1	-0.390262	0.00508751	13.1948	13.391	12.9987	13.621	13.6618	13.4939
1363	ENSMUSG00000015149	Sirt2	0.0470106	0.876948	10.7907	10.6787	10.8577	10.6981	10.8637	10.619
1364	ENSMUSG00000015165	Hnrnpl	-0.346516	0.00318506	14.4859	14.4134	14.478	14.7965	14.8445	14.7759
1365	ENSMUSG00000015176	Nolc1	0.297866	0.0162694	12.8293	12.798	12.8732	12.5656	12.5323	12.5099
1366	ENSMUSG00000015189	Casd1	1.12667	1.02516e-07	10.8369	10.9688	11.0722	9.6646	9.77507	10.0495
1367	ENSMUSG00000015202	Cnksr3	0.121144	0.729624	9.59625	9.44522	9.72387	9.44432	9.37691	9.58664
1368	ENSMUSG00000015214	Mtmr1	-0.236764	0.708161	8.37676	7.45787	7.43888	8.13043	8.14809	7.89511
1369	ENSMUSG00000015217	Hmgb3	1.06763	6.43778e-16	12.1365	12.1747	12.3223	11.2892	11.0703	11.0703
1370	ENSMUSG00000015222	Map2	0.850573	0.255466	6.36324	7.07478	6.11262	5.52893	6.13531	5.5796
1371	ENSMUSG00000015243	Abca1	0.688847	0.0996327	8.80582	9.32959	8.30267	7.76832	8.32161	8.40784
1372	ENSMUSG00000015247	Nipsnap3b	-0.390683	0.243709	9.843	10.0568	10.1316	10.4214	10.4071	10.3854
1373	ENSMUSG00000015289	Lage3	-0.50044	0.0220323	10.0028	9.69162	9.91845	10.5548	10.3748	10.1716
1374	ENSMUSG00000015290	Ubl4a	-0.0351425	0.897568	11.3179	11.1471	11.0626	11.3696	11.1826	11.0783
1375	ENSMUSG00000015291	Gdi1	-0.113755	0.601983	11.879	11.8654	12.105	11.9665	12.09	12.1404
1376	ENSMUSG00000015305	Sash1	0.921236	6.70535e-05	10.2112	10.5314	10.2557	9.34023	9.36336	9.55451
1377	ENSMUSG00000015312	Gadd45b	-2.68164	6.32277e-08	6.09105	7.20458	5.89998	8.9085	8.86413	9.56593
1378	ENSMUSG00000015335	Zdhhc12	-0.63489	0.00136215	9.96788	9.75003	10.1055	10.6769	10.5713	10.488
1379	ENSMUSG00000015337	Endog	-1.47944	1.29086e-06	8.3225	8.7921	8.63068	10.2091	10.2404	9.67717
1380	ENSMUSG00000015341	Golga7	0.278399	0.28966	11.0707	11.092	10.9101	10.662	10.4289	11.079
1381	ENSMUSG00000015342	Xk	0.41991	0.680451	7.06852	7.12609	7.33679	6.80138	6.69265	6.82724
1382	ENSMUSG00000015354	Pcolce2	1.97085	0.000110189	7.17598	6.17659	7.6914	5.42655	4.99853	5.38702
1383	ENSMUSG00000015357	Clpx	0.352116	0.200952	9.57855	9.8465	9.96025	9.33317	9.57995	9.43505
1384	ENSMUSG00000015363	Trabd	-0.918867	5.28773e-12	11.6651	11.5223	11.4563	12.5251	12.559	12.3096
1385	ENSMUSG00000015365	Mov10l1	-5.34119	5.03998e-05	6.07094	6.28893	5.87105	11.443	11.3004	11.2807
1386	ENSMUSG00000015377	Dennd6b	-0.989283	0.00123162	8.62453	8.17029	8.7347	9.38868	9.27204	9.81276
1387	ENSMUSG00000015396	Cd83	0.538936	0.857992	3.52974	6.17659	4.09079	3.36817	5.04454	4.90182
1388	ENSMUSG00000015451	C4a	1.53151	0.664542	5.01391	2.31504	5.12185	3.03864	4.3627	2
1389	ENSMUSG00000015452	Ager	-0.361138	0.718312	7.36952	5.96744	6.42277	6.75988	6.93174	7.40368
1390	ENSMUSG00000015461	Atf6b	-0.0707519	0.777827	12.2822	12.1163	12.08	12.2542	12.2895	12.1518
1391	ENSMUSG00000015467	Egfl8	-0.010798	0.999515	5.01391	2	3.31135	3.86224	2.82934	4.63894
1392	ENSMUSG00000015468	Notch4	-2.83328	1.40601e-29	7.16654	6.82443	7.45846	10.0082	9.96646	9.92786
1393	ENSMUSG00000015474	Ppt2	-0.951841	0.00154137	8.70829	9.08961	9.27706	10.0914	10.0977	9.75406
1394	ENSMUSG00000015478	Rnf5	-0.244617	0.256076	10.6656	10.4196	10.6359	10.7635	10.9546	10.7373
1395	ENSMUSG00000015484	Fam163a	-2.28374	0.305105	2.7721	4.06096	3.87465	5.19703	4.95101	6.1644
1396	ENSMUSG00000015488	Cacfd1	0.406053	0.164527	10.9759	10.8411	10.5923	10.3228	10.1696	10.6798
1397	ENSMUSG00000015501	Hivep2	-1.73651	0.00845944	7.37773	5.96744	7.6062	8.92737	8.76456	8.84907
1398	ENSMUSG00000015522	Arnt	0.415849	0.028589	11.1549	11.1995	11.2596	10.6695	10.7709	10.919
1399	ENSMUSG00000015533	Itga2	0.928229	0.300807	4.92707	7.03238	5.68413	5.15496	5.13237	5.54924
1400	ENSMUSG00000015536	Mocs2	-0.286931	0.503874	8.30108	8.41685	9.00815	8.59509	8.96326	9.07634
1401	ENSMUSG00000015542	Nat9	-0.20062	0.719023	8.48711	8.54681	9.22085	9.0123	9.14054	8.7951
1402	ENSMUSG00000015568	Lpl	0.992491	1.46176e-11	11.9618	12.2262	12.1281	10.9153	11.2093	11.2103
1403	ENSMUSG00000015575	Atp6v0e	-0.572309	0.00164979	11.004	10.7863	10.8577	11.5139	11.2819	11.5597
1404	ENSMUSG00000015579	Nkx2-5	-8.74788	2.62966e-96	5.56708	5.21687	6.16122	14.3105	14.4389	14.2275
1405	ENSMUSG00000015597	Zfp318	0.71709	0.00455252	9.78862	10.2985	9.90245	9.21529	9.46201	9.20851
1406	ENSMUSG00000015599	Ttbk1	-0.620261	0.751933	3.93772	6.34197	6.06233	5.74285	6.13531	6.9132
1407	ENSMUSG00000015605	Srf	-1.20172	2.91106e-32	12.2825	12.2013	12.2256	13.4828	13.3618	13.4662
1408	ENSMUSG00000015619	Gata3	-0.44887	0.559644	6.60619	6.30683	5.50743	6.56481	6.95602	6.33429
1409	ENSMUSG00000015627	Gata5	-0.771238	4.91553e-08	11.9591	11.9045	12.0066	12.5993	12.8282	12.7469
1410	ENSMUSG00000015647	Lama5	0.42312	0.072967	12.7763	12.4964	12.1935	11.8497	12.3981	11.948
1411	ENSMUSG00000015652	Steap1	1.24518	0.0342406	6.97422	7.02158	7.3989	6.48216	5.77494	5.38702
1412	ENSMUSG00000015653	Steap2	1.03071	0.00268152	9.01501	8.93993	8.28084	7.74014	7.79805	7.75581
1413	ENSMUSG00000015656	Hspa8	0.0663913	0.744806	15.6286	15.7408	15.703	15.6391	15.6847	15.5484
1414	ENSMUSG00000015659	Serac1	0.26042	0.738993	7.25832	7.195	7.15674	6.96859	6.31498	7.37799
1415	ENSMUSG00000015668	Pdzd11	-0.212731	0.529125	9.97736	10.2691	10.4504	10.4303	10.4863	10.4536
1416	ENSMUSG00000015671	Psma2	-0.0822375	0.682837	12.0788	12.0066	12.0367	12.1899	12.1245	12.0518
1417	ENSMUSG00000015672	Mrpl32	-0.29286	0.381538	8.88282	9.03964	9.15637	9.42675	9.25502	9.27496
1418	ENSMUSG00000015697	Setdb1	0.72999	1.34621e-05	11.7298	12.1087	11.7895	11.0054	11.1774	11.2749
1419	ENSMUSG00000015702	Anxa9	0.761734	0.521751	6.27809	4.36424	5.87105	4.64879	5.43835	4.85294
1420	ENSMUSG00000015709	Arnt2	2.51469	1.25502e-20	10.347	10.3684	10.1943	7.59034	7.31628	8.32961
1421	ENSMUSG00000015711	Prune1	-0.115802	0.578231	11.1489	11.1723	11.2165	11.2832	11.2699	11.3312
1422	ENSMUSG00000015714	Cers2	-0.616091	1.22267e-05	11.002	10.9674	10.9383	11.6231	11.5081	11.6199
1423	ENSMUSG00000015733	Capza2	0.141245	0.613821	11.3002	11.6181	11.4988	11.2752	11.1947	11.5211
1424	ENSMUSG00000015745	Plekho1	-0.782289	8.49379e-07	11.7545	11.3942	11.868	12.4675	12.4336	12.5
1425	ENSMUSG00000015747	Vps45	-0.306255	0.346161	9.48285	9.17737	9.347	9.87197	9.7141	9.2911
1426	ENSMUSG00000015748	Prpf3	0.437596	0.0275102	10.4712	10.6369	10.8521	10.3287	10.1552	10.1852
1427	ENSMUSG00000015749	Anp32e	0.257244	0.100261	12.8455	12.8993	13.0556	12.562	12.6218	12.8383
1428	ENSMUSG00000015750	Aph1a	-0.575009	0.000223431	11.3733	11.4566	11.4224	12.0474	12.0903	11.8251
1429	ENSMUSG00000015755	Tab2	0.0762758	0.822599	11.5972	11.859	11.6053	11.426	11.4403	11.9245
1430	ENSMUSG00000015757	Ppil4	0.3105	0.497028	9.2343	8.87242	9.41121	8.44606	8.77483	9.29339
1431	ENSMUSG00000015759	Cnih1	-0.239988	0.24099	11.178	11.4666	11.0139	11.3822	11.4717	11.5559
1432	ENSMUSG00000015766	Eps8	2.61194	3.76817e-23	10.8053	10.5901	10.7123	8.13043	7.92646	8.25632
1433	ENSMUSG00000015776	Med22	0.685365	0.000123891	11.9989	11.8718	12.0224	11.231	11.49	11.0948
1434	ENSMUSG00000015790	Surf1	-0.332091	0.35313	9.2984	8.80475	9.62555	9.66272	9.397	9.74906
1435	ENSMUSG00000015804	Med28	-0.149353	0.497028	11.1756	11.2708	11.0778	11.4534	11.2741	11.2421
1436	ENSMUSG00000015806	Qdpr	-0.503947	0.0259314	10.5694	10.7185	10.6121	11.2672	10.8369	11.2674
1437	ENSMUSG00000015837	Sqstm1	-0.0790063	0.747683	12.7423	12.7038	12.6728	12.7831	12.8611	12.7084
1438	ENSMUSG00000015839	Nfe2l2	-0.0340719	0.924674	10.2709	10.3958	10.7021	10.4159	10.6328	10.4454
1439	ENSMUSG00000015843	Rxrg	-3.40506	0.0175075	4.62998	2	4.91066	7.08519	6.93174	7.96003
1440	ENSMUSG00000015846	Rxra	0.0239829	0.924397	11.6452	11.7025	11.5476	11.6355	11.4323	11.7432
1441	ENSMUSG00000015850	Adamtsl4	-0.795569	0.122746	7.18537	6.77385	7.24957	7.93297	8.04436	7.56413
1442	ENSMUSG00000015854	Cd5l	-5.6203	#N/A	2	2	2	2.33751	2	4.9491
1443	ENSMUSG00000015869	Prpsap1	0.118424	0.572784	11.9164	12.029	11.7963	11.8252	11.848	11.7204
1444	ENSMUSG00000015879	Fam184b	-1.64836	0.6621	2	2	3.62032	4.14614	2	3.99561
1445	ENSMUSG00000015880	Ncapg	1.10575	0.000113675	10.016	10.7791	10.3452	9.24066	9.44924	9.23974
1446	ENSMUSG00000015882	Lcorl	-0.35892	0.666393	6.93024	7.48957	7.62365	7.25412	7.11539	8.42884
1447	ENSMUSG00000015889	Lta4h	-0.279708	0.0571121	12.3393	12.3536	12.2923	12.522	12.5697	12.7248
1448	ENSMUSG00000015890	Amdhd1	2.79291	0.283597	2.55761	2	3.31135	2	2.33223	2
1449	ENSMUSG00000015932	Dstn ENSMUSG00000015932	-1.59376	3.27999e-40	12.6738	12.8929	12.8562	14.4119	14.4031	14.3967
1450	ENSMUSG00000015937	Macroh2a1	1.32285	6.2274e-26	13.1932	13.1014	13.2362	11.7831	12.01	11.7619
1451	ENSMUSG00000015942	Gtf2ird2	0.161958	0.725253	9.04624	9.22521	8.83173	8.68283	8.98996	8.95709
1452	ENSMUSG00000015943	Bola1	-0.309223	0.473622	9.87959	8.91681	9.62121	10.1475	9.88504	9.36487
1453	ENSMUSG00000015944	Castor2	-0.844266	0.00809141	9.63956	9.67793	9.42371	10.2671	10.2576	10.7058
1454	ENSMUSG00000015947	Fcgr1	1.22248	0.78783	2	5.05684	2	3.63625	3.02562	2
1455	ENSMUSG00000015950	Ncf1	0.184581	0.942474	4.62998	4.14296	4.18782	4.76523	4.56565	2
1456	ENSMUSG00000015957	Wnt11	-1.15376	2.28072e-10	9.91386	9.84191	9.88989	11.104	10.9969	10.9942
1457	ENSMUSG00000015961	Adss	0.689963	3.06619e-06	11.11	11.3581	11.3528	10.5117	10.6043	10.6488
1458	ENSMUSG00000015968	Cacna1d	-3.00655	6.78507e-09	6.66103	7.40068	7.08298	9.68691	10.1953	10.2036
1459	ENSMUSG00000015970	Chdh	0.107878	0.979178	3.52974	2	4.44499	3.36817	3.02562	4.08299
1460	ENSMUSG00000015971	Actr8	-0.174198	0.565723	10.2981	10.3968	10.328	10.4748	10.4137	10.647
1461	ENSMUSG00000015980	Lrrc27	-1.1921	0.031438	6.02985	7.31483	7.21546	7.85627	8.03299	8.42048
1462	ENSMUSG00000015981	Stk32c	0.331558	0.862767	6.11088	6.50591	5.98344	6.41244	5.88017	5.16472
1463	ENSMUSG00000015994	Fnta	0.0954618	0.706738	11.3066	11.3195	11.2092	11.311	11.1729	11.0576
1464	ENSMUSG00000016018	Mtrex	0.804168	1.59556e-05	10.7768	11.1607	11.2484	10.1501	10.2902	10.3714
1465	ENSMUSG00000016024	Lbp	-1.84431	3.72753e-05	6.31276	6.65311	5.74917	7.67465	8.28853	8.1988
1466	ENSMUSG00000016028	Celsr1	-0.285554	0.289195	11.6941	11.3549	11.4917	11.7771	11.8832	11.7532
1467	ENSMUSG00000016087	Fli1	-1.5409	0.0055404	6.9524	7.93734	6.80568	8.40177	8.71207	9.27496
1468	ENSMUSG00000016128	Stard13	0.505537	0.283304	7.98909	8.04791	8.11803	7.25412	7.61198	7.75581
1469	ENSMUSG00000016179	Camk1g	0.0159757	0.983604	8.17956	8.42097	7.99606	7.77528	8.63523	8.03316
1470	ENSMUSG00000016181	Utp25	0.339218	0.0773588	10.2043	10.3555	10.2174	9.99631	9.8882	9.88139
1471	ENSMUSG00000016194	Hsd11b1	-1.89709	0.588234	2.55761	2	3.98676	4.22959	3.19836	5.1241
1472	ENSMUSG00000016200	Syt14	0.973094	0.0609251	8.18892	7.34113	8.17239	7.05119	7.16829	6.74925
1473	ENSMUSG00000016206	H2-M3	-0.574533	0.855936	2.55761	5.21687	2	4.52213	4.12646	4.58009
1474	ENSMUSG00000016239	Lonrf3	4.37162	0.0761793	3.12405	2	3.47409	2	2	2
1475	ENSMUSG00000016252	Atp5e	-0.87834	0.000328058	12.0135	11.7434	12.0448	13.1055	12.8773	12.3776
1476	ENSMUSG00000016253	Nelfcd	-0.457224	0.00446667	11.8757	11.5951	11.9438	12.2632	12.309	12.2343
1477	ENSMUSG00000016255	Tubb1	-2.19895	0.029571	6.70083	5.17849	4.66317	8.40626	7.68641	7.43723
1478	ENSMUSG00000016256	Ctsz	-0.226329	0.252386	11.3115	11.5937	11.3548	11.7662	11.6063	11.5749
1479	ENSMUSG00000016257	Prelid3b	-0.597575	0.000118532	10.6462	10.6562	10.7235	11.3604	11.2783	11.171
1480	ENSMUSG00000016262	Sertad4	2.83825	2.57735e-17	9.39054	9.48507	9.22657	6.26201	6.81714	6.62374
1481	ENSMUSG00000016308	Ube2a	-0.295861	0.231987	10.1224	9.83421	10.0645	10.4192	10.2625	10.2326
1482	ENSMUSG00000016319	Slc25a5	-1.17954	2.8768e-15	13.5755	13.4998	13.7311	14.8608	14.7906	14.6978
1483	ENSMUSG00000016344	Ppdpf	0.437368	0.0282552	11.442	11.1527	11.4959	10.9185	10.9733	10.9108
1484	ENSMUSG00000016346	Kcnq2	5.46256	0.0667166	3.64305	2	4.36425	2	2	2
1485	ENSMUSG00000016349	Eef1a2	-3.26264	1.2782e-13	7.74441	7.37546	7.65792	10.344	11.0633	10.9991
1486	ENSMUSG00000016356	Col20a1	-0.278887	0.923489	4.10528	5.25425	3.75308	3.36817	4.851	5.38702
1487	ENSMUSG00000016382	Pls3	2.93671	8.38576e-35	12.2479	13.2459	12.9917	9.86056	10.185	9.78859
1488	ENSMUSG00000016386	Mpped2	-2.64535	1.01696e-19	9.49234	9.34266	9.52468	12.2383	12.0126	12.0186
1489	ENSMUSG00000016409	Nkap	0.462051	0.53313	8.82995	9.38751	8.56446	8.29927	8.16381	8.94548
1490	ENSMUSG00000016427	Ndufa1	-0.652089	0.122359	9.30918	8.91972	10.0042	10.3556	10.1301	9.86454
1491	ENSMUSG00000016458	Wt1	4.22988	1.03396e-80	12.7728	12.7548	12.7841	8.34209	7.99835	9.09748
1492	ENSMUSG00000016477	E2f3	0.0270259	0.920556	10.9214	10.7831	10.7916	10.7626	10.7546	10.898
1493	ENSMUSG00000016481	Cr1l	-0.234589	0.486164	9.73371	9.46329	9.56813	9.85893	9.83683	9.78208
1494	ENSMUSG00000016487	Ppfibp1	1.95107	1.0764e-42	12.3476	12.623	12.3438	10.4907	10.3871	10.6024
1495	ENSMUSG00000016494	Cd34	-3.56726	6.20715e-57	7.41809	7.73407	7.92043	11.1239	11.0744	11.4975
1496	ENSMUSG00000016495	Plgrkt	-0.321327	0.538142	7.84258	8.09503	7.96902	8.39275	8.39891	8.04952
1497	ENSMUSG00000016496	Cd274	-1.16378	0.707789	3.84602	3.56188	2.91765	3.50843	4.28817	4.90182
1498	ENSMUSG00000016503	Gtf3a	-0.160061	0.688381	10.0107	9.73524	10.2303	10.083	10.2454	10.1628
1499	ENSMUSG00000016510	Mtif3	-0.828741	0.0390227	8.44084	7.84236	8.04868	9.11187	8.8577	8.87378
1500	ENSMUSG00000016520	Lnx2	0.192199	0.671625	9.39256	9.35347	9.42122	8.97651	8.82512	9.65239
1501	ENSMUSG00000016526	Dyrk3	0.277545	0.653996	7.42603	7.77965	7.9826	7.12931	7.0379	8.03316
1502	ENSMUSG00000016528	Mapkapk2	-0.738413	3.12963e-07	13.3348	13.3102	13.2054	14.0984	14.0408	13.9237
1503	ENSMUSG00000016534	Lamp2	0.430052	0.105981	11.0348	11.1875	10.9539	10.3787	10.585	10.889
1504	ENSMUSG00000016541	Atxn10	-0.371867	0.00711739	13.0594	13.3298	13.1382	13.4774	13.5691	13.6067
1505	ENSMUSG00000016552	Foxred2	1.53144	0.00012906	8.4795	8.22779	8.21905	7.17213	7.04923	5.94872
1506	ENSMUSG00000016554	Eif3d	-0.0600868	0.78882	12.9589	12.893	13.0348	13.0573	13.1301	12.8707
1507	ENSMUSG00000016559	H3f3b	1.23461	2.97366e-31	14.3022	14.4003	14.341	13.2095	13.0418	13.0859
1508	ENSMUSG00000016619	Nup50	0.368784	0.00930212	12.2487	12.2215	12.1993	11.8431	11.7761	11.9407
1509	ENSMUSG00000016624	Phf21b	0.379759	0.761535	6.44365	5.58282	6.71092	5.02085	4.74353	6.99433
1510	ENSMUSG00000016637	Ift27	0.258872	0.55548	9.96243	9.88126	10.0836	9.71975	9.83847	9.59223
1511	ENSMUSG00000016664	Pacsin2	0.0313504	0.915033	11.7474	11.7143	11.5804	11.5914	11.557	11.7938
1512	ENSMUSG00000016756	Cmah	-1.57802	0.624438	3.7481	2	4.09079	4.38326	3.49196	5.54924
1513	ENSMUSG00000016757	Ttll12	-0.286336	0.146772	12.3226	12.1295	12.2967	12.5303	12.622	12.4577
1514	ENSMUSG00000016758	Bik	-3.43747	0.0128644	5.47825	2	6.31949	8.76205	8.57381	8.8334
1515	ENSMUSG00000016763	Scube1	-0.586988	0.164531	10.3313	10.5333	9.85338	10.7423	10.7026	11.081
1516	ENSMUSG00000016831	Tox4	-0.225546	0.185077	11.319	11.3656	11.2315	11.477	11.5193	11.5964
1517	ENSMUSG00000016833	Mrps18c	-0.143535	0.719223	9.06924	9.22286	9.01147	9.20759	8.95726	9.5197
1518	ENSMUSG00000016918	Sulf1	0.44924	0.110359	10.5043	10.7093	10.1255	10.0199	9.93016	10.1014
1519	ENSMUSG00000016921	Srsf6	0.119271	0.539756	13.4692	13.523	13.4742	13.3344	13.3662	13.4078
1520	ENSMUSG00000016933	Plcg1	0.705615	5.66178e-10	12.6315	12.6953	12.6431	11.96	12.0284	11.8626
1521	ENSMUSG00000016940	Kctd2	0.162039	0.565396	9.98141	9.79194	10.107	9.84742	9.64299	9.90856
1522	ENSMUSG00000016942	Tmprss6	2.2845	0.00378014	5.3506	4.82807	5.46934	4.14614	3.49196	2
1523	ENSMUSG00000016946	Kctd5	0.403355	0.0109794	11.9111	11.657	11.772	11.4463	11.3539	11.3407
1524	ENSMUSG00000016984	Etaa1	0.97036	0.00262747	8.93382	9.15283	9.27981	8.35143	8.38556	7.6596
1525	ENSMUSG00000016995	Matn4	3.14616	0.000135665	7.88351	7.51289	6.38234	4.38326	4.43357	4.63894
1526	ENSMUSG00000017002	Slpi	-3.1718	0.224151	3.12405	2	2.91765	4.82011	3.84381	5.45411
1527	ENSMUSG00000017009	Sdc4	1.61657	2.13961e-16	10.7486	10.6065	11.0618	9.14718	9.15895	9.3116
1528	ENSMUSG00000017057	Il13ra1	-0.355555	0.714448	7.04809	6.69449	6.79031	6.95639	6.80383	7.67374
1529	ENSMUSG00000017119	Nbr1	-0.129264	0.526553	11.1045	11.3371	11.3137	11.2454	11.4258	11.4719
1530	ENSMUSG00000017132	Cyth1	-0.286208	0.381832	9.45209	9.7136	9.57038	9.80384	9.83847	9.95562
1531	ENSMUSG00000017144	Rnd3	1.37867	1.74864e-15	11.0776	11.5175	11.3567	9.80213	9.97391	10.071
1532	ENSMUSG00000017146	Brca1	0.790652	0.000887898	10.2851	10.8108	10.5289	9.5955	9.97094	9.71698
1533	ENSMUSG00000017167	Cntnap1	-1.78341	0.409507	5.21055	2	3.98676	4.97322	5.63159	6.42069
1534	ENSMUSG00000017176	Nt5c3b	0.0944028	0.737876	11.3692	11.1625	11.1962	11.2454	11.2356	10.9549
1535	ENSMUSG00000017188	Coa3	-0.543361	0.01715	11.0132	11.0001	11.1005	11.7504	11.7684	11.1407
1536	ENSMUSG00000017195	Zpbp2	-1.86768	0.700773	2	2	2.67147	3.50843	2.33223	2
1537	ENSMUSG00000017210	Med24	-0.550322	0.000335822	11.7497	11.7536	11.7344	12.2202	12.3373	12.3267
1538	ENSMUSG00000017221	Psmd3	-0.293979	0.0578941	13.5296	13.5195	13.6222	13.8854	13.869	13.7993
1539	ENSMUSG00000017264	Exosc10	-0.0333728	0.887941	11.8894	11.8005	11.9268	11.9562	11.9907	11.7623
1540	ENSMUSG00000017286	Glod4	0.496173	0.0122543	10.6334	10.4751	10.611	10.1461	9.94236	10.1426
1541	ENSMUSG00000017288	Vps53	-0.411793	0.0672431	10.327	10.0328	10.4686	10.7512	10.6927	10.647
1542	ENSMUSG00000017291	Taok1	0.302451	0.543769	10.0524	9.86474	9.91136	9.42454	9.4471	9.98711
1543	ENSMUSG00000017299	Dnttip1	-0.133783	0.621108	10.3699	10.0515	10.2346	10.3012	10.4257	10.344
1544	ENSMUSG00000017307	Acot8	-0.483782	0.188382	8.30108	8.67982	8.62636	9.03567	9.12188	8.90709
1545	ENSMUSG00000017309	Cd300lg	-7.80452	8.48059e-06	2	2	2	5.77098	5.63159	5.1241
1546	ENSMUSG00000017311	Pyy	-2.48919	0.32814	2	2	2.37445	2.33751	3.19836	2
1547	ENSMUSG00000017314	Mpp2	-0.651729	0.00117027	11.1978	10.9611	11.1823	11.6182	11.8504	11.8255
1548	ENSMUSG00000017316	Ppy	-6.24592	0.0778135	2	2	2	4.05757	4.28817	4.24331
1549	ENSMUSG00000017344	Vtn	9.3751	5.16307e-13	6.56364	8.45347	8.23617	2	2.33223	2
1550	ENSMUSG00000017376	Nlk	0.359614	0.103752	10.3893	10.4662	10.1781	9.99184	10.0322	9.94982
1551	ENSMUSG00000017386	Traf4	0.4094	0.00329198	12.4473	12.2965	12.4076	11.9906	12.1111	11.8111
1552	ENSMUSG00000017390	Aldoc	-1.36005	0.00920883	7.43393	6.66703	8.71855	9.13641	9.23035	9.2302
1553	ENSMUSG00000017400	Stac2	2.45044	0.0470285	7.86026	7.05374	6.77478	5.06695	5.33106	4.51873
1554	ENSMUSG00000017404	Rpl19	-0.255902	0.195497	14.6408	14.4908	14.5729	15.0102	14.854	14.5795
1555	ENSMUSG00000017405	Nek8	0.0881923	0.876324	8.75315	8.11039	8.76647	8.57927	8.64273	8.1988
1556	ENSMUSG00000017418	Arl5b	1.01474	5.19897e-05	10.7255	10.5569	10.4095	9.43116	9.60511	9.63261
1557	ENSMUSG00000017421	Zfp207	0.323115	0.0280019	12.4734	12.8082	12.658	12.3286	12.3474	12.3141
1558	ENSMUSG00000017428	Psmd11	-0.0500749	0.829223	11.9083	12.0103	11.8116	11.89	11.9299	12.0619
1559	ENSMUSG00000017446	C1qtnf1	2.08545	0.000124857	6.985	8.15555	7.64089	5.87831	5.66142	5.45411
1560	ENSMUSG00000017453	Pipox	-2.21444	0.141218	3.27232	2	4.52144	5.15496	4.43357	6.08196
1561	ENSMUSG00000017466	Timp2	-0.274574	0.216665	11.3141	11.568	11.0155	11.636	11.4822	11.6497
1562	ENSMUSG00000017478	Zc3h18	0.463108	0.000128349	12.0608	11.9649	11.9303	11.5438	11.5371	11.4905
1563	ENSMUSG00000017485	Top2b	1.1484	4.51133e-05	11.6871	12.0324	11.8244	10.2818	10.5772	11.1337
1564	ENSMUSG00000017491	Rarb	0.943659	0.0597845	7.74441	8.58398	7.72412	7.12931	7.04923	7.27042
1565	ENSMUSG00000017493	Igfbp4	0.521013	0.000298704	14.9467	15.043	14.8209	14.4793	14.5144	14.2487
1566	ENSMUSG00000017499	Cdc6	-0.207896	0.260928	11.2959	11.2315	11.1786	11.4031	11.5521	11.3697
1567	ENSMUSG00000017548	Suz12	0.409074	0.316823	10.1015	10.2403	10.1766	9.44432	9.78018	10.0179
1568	ENSMUSG00000017550	Atad5	1.17337	0.000199966	9.04624	9.52957	9.18897	7.83645	8.215	8.2374
1569	ENSMUSG00000017561	Crlf3	-0.169999	0.67972	10.2753	9.50653	10.427	10.4748	10.1328	10.2445
1570	ENSMUSG00000017607	Tns4	0.135131	0.955374	5.89908	4.72533	5.30603	4.64879	4.56565	6.06059
1571	ENSMUSG00000017615	Tnfaip1	-0.529511	1.57794e-06	12.1259	12.1566	12.0689	12.6861	12.6104	12.643
1572	ENSMUSG00000017631	Abr	-0.40371	0.0434118	11.6431	11.7906	11.6957	12.0198	12.0996	12.2169
1573	ENSMUSG00000017639	Rab11fip4	3.30005	2.79851e-32	9.27222	9.58564	9.33116	6.04882	6.55639	5.82745
1574	ENSMUSG00000017652	Cd40	-1.46009	0.00219894	6.09105	6.44255	6.66109	7.80958	7.66448	7.99986
1575	ENSMUSG00000017664	Slc35c2	-0.817334	1.73061e-05	10.9073	10.4502	10.8641	11.557	11.681	11.4653
1576	ENSMUSG00000017667	Zfp334	0.566293	0.00347353	10.8495	11.1953	10.7868	10.438	10.3692	10.3638
1577	ENSMUSG00000017670	Elmo2	0.240391	0.251094	11.544	11.6448	11.4465	11.1931	11.3693	11.3534
1578	ENSMUSG00000017677	Wsb1	-0.255505	0.391928	10.6351	10.6744	10.5967	10.8435	10.7598	11.0528
1579	ENSMUSG00000017679	Ttpal	-0.0813415	0.794007	10.545	10.7235	10.2984	10.5273	10.417	10.8607
1580	ENSMUSG00000017686	Rhot1	0.0412812	0.899261	10.3801	10.5266	10.2332	10.4047	10.4104	10.2085
1581	ENSMUSG00000017692	Rhbdl3	1.4669	0.0819999	7.41809	6.79936	5.43021	4.87297	5.50568	5.66703
1582	ENSMUSG00000017697	Ada	-0.210635	0.815621	7.48041	6.88527	7.48734	7.61383	7.99249	6.62374
1583	ENSMUSG00000017707	Serinc3	-0.48785	0.0154431	11.5499	12.0263	11.8083	12.1192	12.1465	12.5735
1584	ENSMUSG00000017713	Tha1	0.0147105	0.99552	6.1876	6.5666	6.08769	7.14014	6.27694	3.9026
1585	ENSMUSG00000017715	Pgs1	-0.415552	0.0515884	10.6256	10.2496	10.6316	11.0223	10.9009	10.8537
1586	ENSMUSG00000017716	Birc5	0.209235	0.230831	11.781	11.8449	11.8708	11.6932	11.5938	11.5815
1587	ENSMUSG00000017718	Afmid	-1.51224	0.0986035	5.6234	5.09854	5.65048	7.29344	7.11539	5.99451
1588	ENSMUSG00000017721	Pigt	-0.685699	5.57968e-05	11.8589	11.8945	12.1569	12.6298	12.6746	12.6789
1589	ENSMUSG00000017723	Wfdc2	1.98105	0.00039447	8.39305	7.57329	7.2829	4.64879	6.50795	6.0389
1590	ENSMUSG00000017724	Etv4	-2.4781	6.58622e-14	7.41809	7.24227	7.91335	10.0389	9.99457	9.97716
1591	ENSMUSG00000017734	Dbndd2	-1.58333	0.290332	4.57392	4.55605	5.78062	6.85492	6.74931	5.87719
1592	ENSMUSG00000017737	Mmp9	-1.44191	0.78783	3.84602	2	2	4.58685	3.61902	2
1593	ENSMUSG00000017740	Slc12a5	-0.845691	0.13757	6.75225	7.05374	6.64409	7.68946	7.33491	7.87689
1594	ENSMUSG00000017747	Ghdc	-0.802886	0.0333038	8.33521	7.93159	8.49506	9.00639	8.70851	9.40145
1595	ENSMUSG00000017754	Pltp	0.72799	0.388144	7.22231	5.69581	7.55255	6.44772	6.63367	5.72251
1596	ENSMUSG00000017756	Slc12a7	-0.583995	8.55656e-05	10.996	11.0972	11.2484	11.5914	11.8106	11.6907
1597	ENSMUSG00000017760	Ctsa	-1.03594	1.7548e-15	11.4138	11.2536	11.5287	12.408	12.4981	12.4049
1598	ENSMUSG00000017764	Zswim1	-0.369981	0.372439	8.97228	9.2134	8.89416	9.20759	9.48095	9.49602
1599	ENSMUSG00000017765	Slc12a4	-0.988943	1.35517e-12	10.8816	10.7919	11.0122	11.9075	11.9311	11.8143
1600	ENSMUSG00000017774	Myo1c	-1.18884	1.78621e-18	12.1407	12.2747	11.9815	13.3595	13.3902	13.2216
1601	ENSMUSG00000017776	Crk	0.302473	0.071592	11.9526	11.9129	11.8073	11.5453	11.5183	11.7002
1602	ENSMUSG00000017778	Cox7c	-0.806279	1.0269e-07	11.8173	11.5937	11.7691	12.7531	12.3718	12.4528
1603	ENSMUSG00000017781	Pitpna	-0.373107	0.00827921	11.8475	11.7898	11.7284	12.1352	12.1606	12.1904
1604	ENSMUSG00000017801	Mlx	-0.636431	0.0258673	9.60851	9.73359	9.53393	10.076	10.3737	10.3183
1605	ENSMUSG00000017802	Retreg3	-0.0957895	0.614811	11.5098	11.6222	11.444	11.6756	11.6474	11.543
1606	ENSMUSG00000017817	Jph2	-3.78717	3.264e-96	10.9249	10.5247	10.8241	14.5842	14.6038	14.4633
1607	ENSMUSG00000017830	Dhx58	-1.62297	0.634965	3.40676	2	2.91765	4.22959	4.3627	2
1608	ENSMUSG00000017831	Rab5a	0.502331	0.0640571	10.2796	10.6518	10.2724	9.86546	9.92402	9.94546
1609	ENSMUSG00000017832	Hspb9	-0.872758	0.704245	3.84602	5.72273	3.31135	4.92396	3.84381	6.43736
1610	ENSMUSG00000017837	Nkiras2	-0.908621	1.08339e-07	11.4892	11.2782	11.1298	12.2552	12.2279	12.1587
1611	ENSMUSG00000017843	Ppp2r5c	-0.174227	0.483364	11.3375	11.6109	11.3883	11.582	11.5644	11.7221
1612	ENSMUSG00000017858	Ift52	0.169971	0.578482	10.2055	10.2714	10.3146	10.1648	10.1604	9.94982
1613	ENSMUSG00000017861	Mybl2	-0.545018	0.00104141	11.8211	11.6713	11.5533	12.2645	12.1852	12.2415
1614	ENSMUSG00000017868	Sgk2	3.37195	#N/A	2	2	3.31135	2	2	2
1615	ENSMUSG00000017897	Eya2	3.21835	0.0408904	6.09105	3.30117	4.36425	2.33751	3.61902	2
1616	ENSMUSG00000017929	B4galt5	-0.570839	0.0030434	11.0335	11.0206	10.8668	11.4386	11.3321	11.8195
1617	ENSMUSG00000017943	Gdap1l1	0.247632	0.842963	5.72984	6.2708	5.87105	5.06695	5.69065	6.24238
1618	ENSMUSG00000017950	Hnf4a	4.40554	0.000860227	6.1688	8.41273	7.64089	4.82011	3.02562	2
1619	ENSMUSG00000017969	Ptgis	-0.0692548	0.855344	11.4376	11.3311	11.4305	11.4452	11.5396	11.4215
1620	ENSMUSG00000017978	Cadps2	-1.83435	0.554642	4.10528	2	3.31135	4.38326	4.3627	5.28015
1621	ENSMUSG00000017999	Ddx27	0.284277	0.081451	11.5173	11.4395	11.7334	11.3347	11.2362	11.2813
1622	ENSMUSG00000018001	Cyth3	0.753736	0.0020321	10.4826	10.8256	10.2275	9.74301	9.63737	9.94837
1623	ENSMUSG00000018008	Cyth4	-3.05072	0.0194968	3.12405	4.49491	4.96643	7.12931	6.88193	7.42055
1624	ENSMUSG00000018012	Rac3	1.77129	1.28256e-05	8.93103	8.74692	8.91911	7.03967	7.48426	6.76255
1625	ENSMUSG00000018040	Rrp7a	-0.581937	0.000615656	11.8505	11.7135	11.773	12.3956	12.4851	12.188
1626	ENSMUSG00000018042	Cyb5r3	-0.284712	0.149539	12.5091	12.1191	12.416	12.6151	12.4673	12.8213
1627	ENSMUSG00000018068	Ints2	0.785928	0.000133457	10.3984	10.3196	10.1825	9.38641	9.62228	9.543
1628	ENSMUSG00000018076	Med13l	0.602654	0.0329019	10.7892	10.5055	10.4082	9.7659	9.73705	10.3418
1629	ENSMUSG00000018102	H2bc4	-1.33249	0.0246125	6.77729	6.35923	6.03651	7.76832	7.4333	7.90713
1630	ENSMUSG00000018126	Baiap2l2	-3.08559	6.23019e-07	5.13508	4.14296	5.71701	7.55842	8.70134	7.61632
1631	ENSMUSG00000018143	Mafk	-0.983802	0.00105368	9.54249	9.28513	9.71169	10.5898	10.4884	10.4267
1632	ENSMUSG00000018160	Med1	0.0406447	0.921466	10.5987	10.2703	10.3253	10.2903	10.2193	10.5621
1633	ENSMUSG00000018166	Erbb3	1.30382	1.53501e-07	9.97195	10.2805	10.4208	8.78291	9.03908	8.98288
1634	ENSMUSG00000018167	Stard3	-0.805179	0.000737992	10.2609	9.79828	9.89887	10.9457	10.9218	10.5
1635	ENSMUSG00000018169	Mfng	-1.30973	0.0195689	5.38359	6.78666	5.58073	7.53401	7.23925	7.15418
1636	ENSMUSG00000018171	Vmp1	0.0480325	0.889674	10.6971	11.0797	10.4492	10.7529	10.7257	10.6745
1637	ENSMUSG00000018189	Uchl5	0.0946875	0.762104	9.37831	9.62897	9.49891	9.46168	9.42335	9.34733
1638	ENSMUSG00000018196	Glrx2	-0.579933	0.0502627	8.64508	8.64154	8.52322	9.29251	9.04475	9.1914
1639	ENSMUSG00000018199	Ro60	1.14478	0.00266979	9.7273	9.60927	9.527	8.04663	8.3585	8.91901
1640	ENSMUSG00000018209	Stk4	0.170124	0.466508	11.0283	10.9476	10.8796	10.661	10.6543	11.0061
1641	ENSMUSG00000018217	Pmp22	1.57733	3.10269e-40	13.02	13.0432	12.9188	11.2592	11.4387	11.5449
1642	ENSMUSG00000018238	Gdf9	-0.675547	#N/A	3.52974	2	2.91765	3.63625	3.73579	2
1643	ENSMUSG00000018239	Zcchc10	-0.372997	0.490881	7.51803	8.08469	7.87744	8.26012	7.96285	8.38224
1644	ENSMUSG00000018259	Prl8a2	0.767286	0.792318	5.24686	2.79256	4.59405	4.76523	3.84381	2
1645	ENSMUSG00000018263	Tbx5	-0.494574	0.00105066	11.7651	11.657	11.823	12.0755	12.3016	12.3407
1646	ENSMUSG00000018286	Psmb6	-0.39355	0.0823157	13.4431	13.0073	13.2056	13.7322	13.7551	13.3467
1647	ENSMUSG00000018287	Spag7	-0.338449	0.0965109	10.9886	10.8662	11.0872	11.2977	11.2699	11.3929
1648	ENSMUSG00000018293	Pfn1	-0.587036	5.7892e-08	15.2295	15.2291	15.2385	15.8254	15.8806	15.749
1649	ENSMUSG00000018322	Tomm34	-1.07082	3.47523e-06	9.68658	9.59659	9.84782	10.8083	10.7071	10.8247
1650	ENSMUSG00000018326	Ywhab	0.0573651	0.78206	13.2103	13.4692	13.2694	13.3184	13.334	13.1286
1651	ENSMUSG00000018334	Ksr1	-1.4116	8.76609e-12	9.61373	9.74512	9.54771	10.958	10.9394	11.2206
1652	ENSMUSG00000018339	Gpx3	-2.14241	1.55789e-41	13.938	13.6586	13.7521	15.946	15.9791	15.8615
1653	ENSMUSG00000018340	Anxa6	-1.37501	5.35332e-29	12.7344	13.0633	12.8181	14.2	14.3267	14.2303
1654	ENSMUSG00000018347	Zkscan6	-0.639863	0.0540729	8.23484	8.33199	8.00274	8.80349	8.71563	8.95998
1655	ENSMUSG00000018362	Kpna2	0.258735	0.0980345	12.901	12.9233	12.8748	12.5721	12.5439	12.7944
1656	ENSMUSG00000018363	Smurf2	0.430886	0.0527964	10.8845	10.9604	10.4985	10.4554	10.3487	10.2876
1657	ENSMUSG00000018372	Cep95	0.49279	0.373967	8.13182	8.26489	8.37657	7.76832	7.55749	7.97152
1658	ENSMUSG00000018377	Vezf1	1.0905	1.35436e-05	10.7415	10.6404	10.417	9.30459	9.34279	9.84592
1659	ENSMUSG00000018378	Cuedc1	-0.0994831	0.745305	10.647	10.1176	10.5541	10.5002	10.5244	10.6407
1660	ENSMUSG00000018379	Srsf1	0.802398	7.28225e-11	13.6976	13.7032	13.6748	12.7945	12.8866	12.9823
1661	ENSMUSG00000018381	Abi3	-5.58576	1.39336e-39	4.10528	5.09854	4.59405	10.0067	10.0307	9.95417
1662	ENSMUSG00000018387	Shroom1	-0.618804	0.457413	6.64751	5.29068	6.75908	6.90655	6.93174	7.03872
1663	ENSMUSG00000018395	Kif3a	0.170009	0.782772	8.90854	8.52403	9.04423	8.37911	8.3028	9.16911
1664	ENSMUSG00000018398	Septin8	-1.6168	6.54093e-23	10.6299	11.0455	10.5978	12.4071	12.3199	12.4329
1665	ENSMUSG00000018401	Mtmr4	0.166102	0.407928	11.9896	11.826	12.0232	11.7182	11.8464	11.7808
1666	ENSMUSG00000018405	Mrm1	-1.92942	1.38593e-06	6.88488	8.31882	7.37849	9.58563	9.51403	9.58477
1667	ENSMUSG00000018411	Mapt	0.13739	0.939243	5.21055	6.01176	4.36425	4.45436	4.3627	6.12377
1668	ENSMUSG00000018412	Kansl1	0.46212	0.0636557	10.9031	11.4155	10.7426	10.5719	10.5345	10.6577
1669	ENSMUSG00000018415	Gid4	0.363004	0.132055	10.2066	10.0959	10.1573	9.79016	9.55633	9.99699
1670	ENSMUSG00000018417	Myo1b	0.80843	4.92913e-05	10.8219	11.3007	10.9304	10.1962	10.2318	10.2504
1671	ENSMUSG00000018425	Dhx40	0.78876	0.000298033	9.94596	10.3415	10.2641	9.27789	9.52827	9.40781
1672	ENSMUSG00000018427	Ypel2	-0.00806437	0.987437	9.68988	9.87678	9.7618	9.60138	9.52624	10.1477
1673	ENSMUSG00000018428	Akap1	-0.677563	0.000320265	10.9087	10.838	10.876	11.5014	11.5122	11.6353
1674	ENSMUSG00000018433	Nol11	0.0178669	0.950353	11.214	11.2025	11.2554	11.2061	11.1871	11.2254
1675	ENSMUSG00000018442	Derl2	0.16568	0.64537	10.1526	9.78238	9.79105	9.86383	9.58385	9.80153
1676	ENSMUSG00000018446	C1qbp	-0.734456	3.17729e-11	12.578	12.5561	12.5997	13.3655	13.263	13.3059
1677	ENSMUSG00000018449	Rpain	0.166894	0.771739	8.40514	8.96269	8.50921	8.69756	8.62012	8.04408
1678	ENSMUSG00000018451	6330403K07Rik	1.80664	4.78072e-25	11.3866	11.0354	11.3896	9.29251	9.41681	9.69635
1679	ENSMUSG00000018459	Slc13a3	3.72609	0.0168776	2.30558	4.67108	4.52144	2.84054	2	2
1680	ENSMUSG00000018470	Kcnab3	0.973297	0.698031	5.41583	2	5.74917	5.06695	4.28817	2
1681	ENSMUSG00000018474	Chd3	0.628099	0.013773	12.5826	12.8856	12.4519	11.8567	12.0769	12.1247
1682	ENSMUSG00000018476	Kdm6b	-0.162324	0.378569	12.247	12.1741	12.1659	12.3029	12.3973	12.3733
1683	ENSMUSG00000018481	Appbp2	0.215782	0.382095	11.9865	11.9536	11.707	11.5575	11.5942	11.8475
1684	ENSMUSG00000018486	Wnt9b	0.293403	0.814783	6.57796	7.60257	6.23119	6.49907	6.94393	6.43736
1685	ENSMUSG00000018500	Adora2b	-0.0415559	0.99485	4.88161	2	3.62032	3.50843	4.12646	4.16538
1686	ENSMUSG00000018501	Ncor1	0.0229231	0.949483	11.5472	11.9372	11.4816	11.4882	11.6855	11.754
1687	ENSMUSG00000018507	Trpv2	-3.3505	0.0113562	3.40676	2	4.79222	7.39634	6.81714	5.20423
1688	ENSMUSG00000018509	Cenpv	-0.681044	0.276313	6.86166	7.11598	6.80568	7.82308	7.92646	6.80171
1689	ENSMUSG00000018537	Pcgf2	-0.0383049	0.895925	10.5969	10.6735	10.6088	10.6751	10.6072	10.711
1690	ENSMUSG00000018541	Cwc25	0.481924	0.0654792	9.92371	9.93692	10.1008	9.39773	9.397	9.71014
1691	ENSMUSG00000018543	1700001P01Rik	0.534485	0.910182	3.40676	2	2.67147	2	3.35262	2
1692	ENSMUSG00000018547	Pip4k2b	0.484888	0.000183075	12.036	12.0175	11.838	11.4998	11.4947	11.4526
1693	ENSMUSG00000018548	Trim37	0.700627	9.9607e-05	10.988	11.3544	11.0951	10.3672	10.3418	10.6371
1694	ENSMUSG00000018554	Ybx2	1.30213	0.0894869	6.44365	7.35839	5.89998	5.59335	5.29345	5.51822
1695	ENSMUSG00000018559	Ctdnep1	0.0846523	0.751918	11.7466	11.906	11.8812	11.8134	11.8709	11.5852
1696	ENSMUSG00000018565	Elp5	-0.186808	0.441373	11.4787	11.2403	11.3291	11.5494	11.5659	11.502
1697	ENSMUSG00000018566	Slc2a4	-1.67578	2.13269e-07	7.94557	7.28805	8.12417	9.33317	9.64858	9.45566
1698	ENSMUSG00000018567	Gabarap	0.0595407	0.783404	12.646	12.6949	12.5769	12.6081	12.6199	12.5116
1699	ENSMUSG00000018569	Cldn7	1.65994	0.00120496	7.37773	8.36226	6.96474	5.65503	6.25754	6.27985
1700	ENSMUSG00000018570	2810408A11Rik	1.00978	0.025408	7.47277	8.02105	7.85546	6.64299	6.79039	6.99433
1701	ENSMUSG00000018572	Phf23	0.428232	0.00187685	12.229	12.2361	12.1354	11.8273	11.7337	11.757
1702	ENSMUSG00000018574	Acadvl	-0.85675	0.00594932	9.64297	8.66602	9.77747	10.3263	10.3849	10.1553
1703	ENSMUSG00000018581	Dnah11	0.350122	0.906572	3.7481	2	4.72914	3.50843	4.43357	2
1704	ENSMUSG00000018583	G3bp1	0.281031	0.0126728	14.1011	14.0896	14.0175	13.8037	13.834	13.7271
1705	ENSMUSG00000018585	Atox1	-0.740596	4.61076e-05	10.6213	10.3737	10.8032	11.3736	11.4011	11.268
1706	ENSMUSG00000018593	Sparc	0.073182	0.617905	14.6527	14.846	14.6912	14.6235	14.728	14.6237
1707	ENSMUSG00000018599	Mief2	-1.11583	1.35093e-05	9.4579	8.89331	9.45084	10.3957	10.5304	10.2645
1708	ENSMUSG00000018604	Tbx3	-0.285329	0.50308	9.14333	9.65016	8.84666	8.94291	9.80878	9.71185
1709	ENSMUSG00000018648	Dusp14	-0.96398	0.505565	6.20616	5.25425	6.44256	6.85492	7.00337	7.04961
1710	ENSMUSG00000018651	Tada2a	0.0998642	0.759751	9.71601	9.96538	10.093	9.84576	9.77336	9.87834
1711	ENSMUSG00000018654	Ikzf1	0.983525	0.272197	7.85439	6.17659	8.90491	7.55033	6.79039	6.69481
1712	ENSMUSG00000018659	Pnpo	-0.454059	0.320951	9.281	9.75819	10.8108	10.6123	10.5966	10.4288
1713	ENSMUSG00000018661	Cog1	-0.300745	0.248902	10.7486	10.439	10.7878	10.9169	11.1161	10.8537
1714	ENSMUSG00000018666	Cbx1	0.992026	1.01221e-13	12.0115	11.7524	12.0125	10.9732	10.9371	10.9085
1715	ENSMUSG00000018669	Cdk5rap3	0.162703	0.408931	11.6012	11.4041	11.6911	11.4615	11.3978	11.3621
1716	ENSMUSG00000018672	Copz2	0.299167	0.217676	9.97736	10.1062	10.1008	9.75186	9.84823	9.6894
1717	ENSMUSG00000018677	Slc25a39	-0.662151	0.000682586	12.7201	12.5184	12.8391	13.4559	13.4803	13.117
1718	ENSMUSG00000018678	Sp2	-0.378968	0.0582751	10.1358	10.1011	10.0371	10.5508	10.5314	10.3161
1719	ENSMUSG00000018697	Aatf	0.550822	0.0178651	9.81908	10.1378	10.1194	9.45736	9.52015	9.47396
1720	ENSMUSG00000018698	Lhx1	-1.89594	0.626186	3.12405	2	2	3.86224	3.49196	2
1721	ENSMUSG00000018707	Dync1h1	-0.0392771	0.869454	14.5576	14.6575	14.304	14.4201	14.7238	14.4982
1722	ENSMUSG00000018727	Cpsf4l	-0.722783	0.818912	3.93772	2	4.79222	3.63625	3.84381	5.42096
1723	ENSMUSG00000018733	Pex12	0.43614	0.27947	8.62797	8.82352	8.60456	8.39727	8.3585	7.98292
1724	ENSMUSG00000018736	Ndel1	0.111338	0.684719	10.0828	10.3641	10.1453	10.083	10.0449	10.1452
1725	ENSMUSG00000018740	Slc25a35	0.755983	0.603002	5.17331	5.8006	4.96643	4.38326	5.08912	4.51873
1726	ENSMUSG00000018750	Zbtb4	-0.440856	0.232909	8.57184	8.05851	8.49031	8.90216	8.80855	8.76569
1727	ENSMUSG00000018752	Tnfsfm13	0.339036	0.922689	3.52974	2	3.47409	3.96321	2	2
1728	ENSMUSG00000018761	Mpdu1	-0.576116	0.00837736	10.9947	10.9898	10.7897	11.4658	11.6077	11.4298
1729	ENSMUSG00000018765	Fxr2	-0.286895	0.0474457	12.8697	12.7838	12.7685	13.1795	13.1521	12.9414
1730	ENSMUSG00000018770	Atp5g3	-1.53876	2.07684e-19	13.5802	13.5657	13.6024	15.2599	15.2056	14.8681
1731	ENSMUSG00000018774	Cd68	0.438249	0.844701	4.83467	5.05684	6.20824	5.31635	4.28817	5.45411
1732	ENSMUSG00000018776	Slc35g3	-4.68035	#N/A	2	2	2	3.03864	3.84381	2
1733	ENSMUSG00000018796	Acsl1	-1.21451	1.90315e-08	9.29407	9.64313	9.59491	10.6516	10.6543	10.8684
1734	ENSMUSG00000018800	Abca5	0.835208	0.284576	6.97422	7.58801	7.67476	6.13791	7.18892	6.35199
1735	ENSMUSG00000018809	Smyd4	-0.409604	0.477773	8.59667	7.08519	8.06793	8.31846	8.27894	8.70501
1736	ENSMUSG00000018819	Lsp1	1.05366	2.03203e-08	11.6397	11.2599	11.893	10.4325	10.6441	10.6199
1737	ENSMUSG00000018820	Zfyve27	-0.591518	0.0404405	9.62066	8.94851	9.67031	9.90725	10.118	10.0763
1738	ENSMUSG00000018821	Avpi1	-1.36546	4.27575e-07	8.65862	8.05851	8.47117	9.87197	9.7141	9.72549
1739	ENSMUSG00000018822	Sfrp5	3.53131	2.32335e-77	14.4869	14.1886	14.3155	10.6639	10.9079	10.8389
1740	ENSMUSG00000018830	Myh11	-4.56357	1.48158e-06	3.93772	2	2.91765	6.65813	7.21933	6.87699
1741	ENSMUSG00000018841	Rad51d	-0.924967	6.39519e-05	9.15532	9.15531	9.20934	10.1936	10.2429	9.80635
1742	ENSMUSG00000018844	Fndc8	-1.46429	#N/A	3.27232	2	2.37445	2	2	4.51873
1743	ENSMUSG00000018845	Unc45b	-2.05022	1.17032e-22	12.0782	12.0381	12.3683	14.142	14.2195	14.2898
1744	ENSMUSG00000018846	Pank3	0.502415	0.242199	10.3523	10.4052	10.0175	9.11736	9.51607	10.3746
1745	ENSMUSG00000018848	Rars	0.0962698	0.72074	11.632	11.773	12.0338	11.7455	11.8035	11.624
1746	ENSMUSG00000018849	Wwc1	1.22896	3.84495e-07	10.1139	10.3447	10.1055	9.03567	8.75767	9.09485
1747	ENSMUSG00000018858	Mrpl58	-0.170813	0.541276	11.1756	10.9497	11.288	11.4523	11.4575	10.9864
1748	ENSMUSG00000018861	Fdxr	-0.246619	0.531306	9.34101	8.84206	9.48227	9.59156	9.73003	9.07368
1749	ENSMUSG00000018865	Sult4a1	2.92311	2.04596e-10	8.78436	8.02646	8.88696	5.19703	6.4059	5.45411
1750	ENSMUSG00000018882	Mrpl45	-0.489907	0.0133251	10.5969	11.0192	10.7306	11.3964	11.1755	11.2662
1751	ENSMUSG00000018893	Mb	-5.99815	3.73975e-09	2.95878	2	3.12789	7.64456	7.72224	7.08178
1752	ENSMUSG00000018899	Irf1	-1.60647	0.0095388	6.09105	5.42787	4.91066	7.00457	6.66346	7.47001
1753	ENSMUSG00000018900	Slc22a5	-0.840261	0.0679788	7.36952	8.32761	7.27188	8.51004	8.39447	8.77556
1754	ENSMUSG00000018906	P4ha2	0.604795	0.00177708	11	11.0388	11.2491	10.5002	10.6855	10.2749
1755	ENSMUSG00000018909	Arrb1	-0.744728	1.73693e-08	11.1591	11.2702	11.3979	12.0989	12.0093	11.9556
1756	ENSMUSG00000018919	Tm4sf5	5.19095	2.47082e-11	8.15589	8.78892	8.59574	4.64879	3.35262	2.80485
1757	ENSMUSG00000018920	Cxcl16	-3.38665	0.00690502	5.01391	2	2.91765	6.89381	6.93174	6.73583
1758	ENSMUSG00000018921	Pelp1	-0.0247911	0.927718	12.3835	12.3181	12.3455	12.3523	12.5267	12.2275
1759	ENSMUSG00000018923	Med11	-0.112269	0.768759	9.71115	9.29413	9.69322	9.75538	9.62228	9.6894
1760	ENSMUSG00000018931	Natd1	0.639933	3.21368e-06	11.7806	11.6527	11.7588	10.9687	11.1909	11.1099
1761	ENSMUSG00000018932	Map2k3	0.0324154	0.904175	10.9643	11.0574	11.151	11.1375	10.918	11.0172
1762	ENSMUSG00000018965	Ywhah	-0.227289	0.0548516	13.4976	13.5173	13.4653	13.6664	13.6414	13.8459
1763	ENSMUSG00000018973	Hoxb1	6.46638	1.44561e-12	8.09246	6.23385	7.73219	2.84054	2.82934	2
1764	ENSMUSG00000018974	Sart3	-0.0597741	0.756894	12.4115	12.3145	12.2947	12.3791	12.4293	12.394
1765	ENSMUSG00000018983	E2f2	0.324415	0.449508	8.91137	9.30531	9.53854	9.29009	8.8864	8.59412
1766	ENSMUSG00000018986	Slfn3	-1.52524	0.725243	3.7481	2	3.12789	4.87297	4.28817	2
1767	ENSMUSG00000018995	Nars2	-0.130628	0.848561	8.27934	9.0099	8.01602	8.56328	8.32627	8.93083
1768	ENSMUSG00000018999	Slc35b4	0.152563	0.572628	10.8627	10.9369	10.5901	10.6113	10.5475	10.787
1769	ENSMUSG00000019027	Dnah1	1.27643	0.00304966	8.11719	7.77322	8.14848	7.12931	6.72126	6.38674
1770	ENSMUSG00000019039	Dalrd3	-0.751275	0.0073437	9.33048	9.40423	8.92264	9.94323	10.0364	9.96571
1771	ENSMUSG00000019054	Fis1	0.279389	0.18924	11.9426	11.9012	11.9945	11.8952	11.6878	11.3725
1772	ENSMUSG00000019055	Plod1	-1.00152	1.56399e-09	10.9541	10.6658	10.9225	11.8079	12.0205	11.7131
1773	ENSMUSG00000019066	Rab3d	-0.397396	0.512749	6.99571	7.45787	7.5974	8.15732	7.81806	7.1236
1774	ENSMUSG00000019080	Mfsd3	-0.328238	0.616785	7.83066	7.40068	7.57963	7.88873	7.90791	8.01105
1775	ENSMUSG00000019082	Slc25a22	0.0163433	0.961025	10.0408	10.4299	10.1117	10.204	10.218	10.1414
1776	ENSMUSG00000019087	Atp6ap1	-0.632387	4.1158e-06	11.4088	11.596	11.4816	12.1349	12.1661	12.0856
1777	ENSMUSG00000019088	Dnase1l1	-0.496607	0.673257	6.77729	4.29419	6.85083	6.80138	6.52428	7.09235
1778	ENSMUSG00000019102	Aldh3a1	0.731337	#N/A	2	2	4.36425	2	2	3.80318
1779	ENSMUSG00000019122	Ccl9	0	#N/A	2	2	2	2	2	2
1780	ENSMUSG00000019124	Scrn1	2.19978	1.11259e-06	9.28973	9.55039	9.8329	7.53401	7.37147	7.28892
1781	ENSMUSG00000019132	BC005537	0.309214	0.100846	12.0295	12.179	11.97	11.7001	11.6783	11.8737
1782	ENSMUSG00000019139	Isyna1	-0.536979	0.00484203	12.9872	12.7417	13.1738	13.4724	13.6843	13.3701
1783	ENSMUSG00000019143	Hars2	0.51412	0.13325	9.34101	9.31197	9.46059	8.82712	8.91764	8.83969
1784	ENSMUSG00000019158	Tmem160	-0.861633	0.0167579	10.4519	9.70181	10.2045	11.2592	11.1033	10.5904
1785	ENSMUSG00000019173	Rab5c	0.255455	0.0984998	12.5485	12.4686	12.5193	12.3173	12.2244	12.2281
1786	ENSMUSG00000019178	Styxl1	3.69106	0.227882	2.30558	4.36424	3.75308	2.61084	2	2
1787	ENSMUSG00000019179	Mdh2	-1.2022	8.00437e-26	13.4989	13.5209	13.5731	14.7515	14.7476	14.6999
1788	ENSMUSG00000019188	H13	-0.193145	0.343424	11.9343	11.6456	11.9533	11.9687	12.1629	11.9924
1789	ENSMUSG00000019189	Rnf145	0.463641	0.0105388	12.7051	12.4673	12.4854	12.0238	11.9288	12.3014
1790	ENSMUSG00000019194	Scn1b	-1.93117	6.06313e-05	6.68769	6.47458	7.03162	9.0123	8.76456	7.93676
1791	ENSMUSG00000019210	Atp6v1e1	-0.511832	0.000745875	10.9479	11.1408	11.0554	11.6341	11.5391	11.5074
1792	ENSMUSG00000019214	Chtf18	-0.182684	0.507606	11.1088	10.8834	11.1275	11.1489	11.3676	11.1515
1793	ENSMUSG00000019230	Lhx9	5.76149	2.03474e-93	11.6238	11.3555	11.5686	5.65503	5.95435	5.94872
1794	ENSMUSG00000019235	Rps6kl1	-1.98179	0.00116387	5.3506	5.29068	5.68413	7.17213	7.25889	7.53343
1795	ENSMUSG00000019254	Ppp1r12c	-0.356424	0.166994	11.056	10.721	11.1442	11.4403	11.4462	11.1105
1796	ENSMUSG00000019256	Ahr	-0.135108	0.928984	5.44738	3.97401	6.42277	5.82564	6.09216	5.03925
1797	ENSMUSG00000019261	Map1s	-0.260866	0.283971	11.7556	11.3365	11.7203	11.8827	12.0955	11.6116
1798	ENSMUSG00000019278	Dpep1	3.98454	1.90884e-09	7.88351	7.39232	7.93448	4.05757	4.50112	3.69639
1799	ENSMUSG00000019295	Tmem129	-0.469697	0.0379205	10.0015	9.978	9.73796	10.3798	10.4769	10.2738
1800	ENSMUSG00000019297	Nop9	-0.125695	0.493997	11.6609	11.5512	11.6048	11.7822	11.7727	11.6362
1801	ENSMUSG00000019302	Atp6v0a1	-1.0859	2.19709e-10	11.3354	11.3517	11.2975	12.3116	12.369	12.548
1802	ENSMUSG00000019303	Psmc3ip	0.577269	0.211956	8.73409	8.90511	9.03774	8.5142	8.11074	8.32514
1803	ENSMUSG00000019312	Grb7	1.32877	2.26037e-05	8.22122	8.82973	8.01602	7.22392	7.38941	6.54899
1804	ENSMUSG00000019320	Noxo1	0.686963	0.84306	4.18229	2	5.84153	4.87297	4.3627	2
1805	ENSMUSG00000019326	Aoc3	-2.46451	0.000446953	4.78616	6.66703	5.30603	7.79596	8.24486	8.46182
1806	ENSMUSG00000019338	Zfp687	0.185667	0.247122	11.9795	11.8131	11.8703	11.6512	11.6941	11.764
1807	ENSMUSG00000019362	D8Ertd738e	-0.129053	0.669683	11.6545	11.3863	11.6671	11.8534	11.6937	11.5483
1808	ENSMUSG00000019368	Sec14l4	4.2266	3.60288e-06	4.10528	5.69581	5.30603	2	3.19836	2
1809	ENSMUSG00000019370	Calm3	0.108004	0.559644	14.1641	14.0778	13.9479	14.033	13.7908	14.0369
1810	ENSMUSG00000019373	Cops3	0.00326736	0.99552	10.6995	10.7385	10.6835	10.6629	10.6534	10.7918
1811	ENSMUSG00000019428	Fkbp8	-0.49552	0.00492205	13.4218	13.2769	13.4164	13.9925	14.0212	13.5445
1812	ENSMUSG00000019429	Ffar3	1.63994	0.520805	6.22448	4.61471	4.36425	4.14614	2	4.63894
1813	ENSMUSG00000019432	Ddx39b	0.0593137	0.75391	14.2812	14.1754	14.2818	14.2272	14.2919	14.0314
1814	ENSMUSG00000019433	Gipc1 ENSMUSG00000019433	-0.459186	0.00156874	12.6309	12.6012	12.521	13.1152	13.1347	12.8674
1815	ENSMUSG00000019437	Tlcd1	-0.12677	0.832432	7.94557	7.97701	8.12417	8.18894	7.87008	8.32961
1816	ENSMUSG00000019461	Plscr3	0.309459	0.0933652	11.6384	11.754	11.7344	11.217	11.4028	11.5616
1817	ENSMUSG00000019464	Ptger1	0.562162	#N/A	4.45481	2	2.91765	3.03864	3.84381	2
1818	ENSMUSG00000019467	Arhgef25	0.649054	0.00224233	11.1815	11.1327	11.0801	10.358	10.4137	10.663
1819	ENSMUSG00000019470	Xab2	0.0942333	0.675337	11.699	11.6726	11.6249	11.568	11.7098	11.4236
1820	ENSMUSG00000019471	Cdc37	-0.0530643	0.79226	13.7558	13.6985	13.6807	13.8133	13.7049	13.775
1821	ENSMUSG00000019478	Rab4a	-0.668324	1.94469e-05	10.296	10.3641	10.2862	11.0172	10.9234	11.0054
1822	ENSMUSG00000019487	Trip10	-0.755933	0.000529372	10.7012	10.2657	10.5277	11.3523	11.2231	11.2109
1823	ENSMUSG00000019494	Cops6	-0.162325	0.451465	12.6982	12.4316	12.781	12.9133	12.8787	12.6091
1824	ENSMUSG00000019505	Ubb	-0.0644447	0.763772	15.1388	14.8931	15.1188	15.1539	15.1147	15.0872
1825	ENSMUSG00000019518	Ap4m1	0.363185	0.487395	9.11415	9.07663	8.93666	8.36994	8.71207	8.91901
1826	ENSMUSG00000019528	Gyg	-2.17271	5.60044e-30	12.9592	12.9937	13.5	15.362	15.3236	15.3492
1827	ENSMUSG00000019539	Rcn3	0.227985	0.119772	12.7871	12.6434	12.8958	12.5101	12.6469	12.4915
1828	ENSMUSG00000019558	Slc6a8	-1.14449	7.64051e-09	10.1586	9.74348	10.1209	11.0462	11.0738	11.3429
1829	ENSMUSG00000019564	Arid3a	0.0792949	0.77858	11.6152	11.5619	11.4055	11.4293	11.3233	11.5885
1830	ENSMUSG00000019577	Pdk4	-3.47377	0.000127236	4.73595	5.05684	5.07188	7.80278	8.31223	8.55645
1831	ENSMUSG00000019578	Ubxn6	-0.272779	0.37906	9.62412	9.69503	9.52003	9.90408	10.035	9.70153
1832	ENSMUSG00000019579	Mydgf	-0.571578	0.0106736	11.2111	10.8053	11.0825	11.8555	11.6654	11.2563
1833	ENSMUSG00000019590	Cyb561	1.00474	0.256808	6.36324	6.42627	5.43021	4.76523	5.5382	5.24269
1834	ENSMUSG00000019647	Sema6a	2.61929	1.04165e-13	10.1869	9.95122	10.0501	7.02806	7.38047	7.88299
1835	ENSMUSG00000019659	Ccdc12	-0.157928	0.498708	10.564	10.6924	10.6498	10.8697	10.85	10.6524
1836	ENSMUSG00000019689	Fmc1	-1.48121	2.55036e-07	8.72447	8.85732	8.49979	10.417	10.2806	9.74069
1837	ENSMUSG00000019699	Akt3	0.731855	0.0024564	10.2884	10.3052	9.9807	9.27298	9.55434	9.56593
1838	ENSMUSG00000019710	Mrpl24	-0.214079	0.377853	10.4264	10.5855	10.2332	10.6908	10.6552	10.5593
1839	ENSMUSG00000019715	Gle1	-0.0322447	0.905178	11.6571	11.3533	11.524	11.567	11.559	11.5207
1840	ENSMUSG00000019718	L3hypdh	-1.04343	0.00471772	7.40208	8.1506	7.72412	8.88618	9.02481	8.50596
1841	ENSMUSG00000019726	Lyst	-0.145212	0.834468	7.70581	7.70061	8.16645	7.90785	8.00999	8.12351
1842	ENSMUSG00000019731	Slc35e1	-0.16664	0.383114	12.1167	12.0699	11.8482	12.3229	12.1484	12.0656
1843	ENSMUSG00000019732	Calr3	0.529721	0.82575	5.17331	5.64042	3.87465	4.70819	4.03826	4.9491
1844	ENSMUSG00000019734	Tmc4	0.582847	0.450398	6.60619	6.17659	7.08298	5.92912	6.45783	5.87719
1845	ENSMUSG00000019737	Syne4	-0.361889	0.548794	7.63223	7.93159	7.68311	8.38821	8.11074	7.76904
1846	ENSMUSG00000019738	Polr2i	-0.267688	0.526048	9.74168	9.87077	10.0109	10.2219	10.2429	9.95272
1847	ENSMUSG00000019761	Krt10	0.747821	0.359672	6.9524	6.77385	7.23829	6.37628	6.4059	6.0389
1848	ENSMUSG00000019763	Rmnd1	-0.106668	0.859242	8.66869	9.1329	8.77039	9.02695	9.19509	8.65954
1849	ENSMUSG00000019768	Esr1	-5.38852	0.0324887	2.55761	2	2	5.11163	5.43835	3.99561
1850	ENSMUSG00000019773	Fbxo5	0.500201	0.0503758	10.0778	10.2726	10.1914	9.6646	9.64299	9.74404
1851	ENSMUSG00000019774	Mtrf1l	0.301104	0.652708	7.65267	8.03185	7.76401	7.22392	6.8692	8.16915
1852	ENSMUSG00000019775	Rgs17	2.23036	0.00646539	6.50489	7.14612	5.61603	4.30847	4.68664	4.58009
1853	ENSMUSG00000019777	Hdac2	1.04328	2.77956e-09	12.0029	12.3043	12.1124	11.182	10.928	11.1852
1854	ENSMUSG00000019779	Frk	-0.107865	0.94114	5.38359	5.17849	5.78062	4.70819	6.07008	5.60934
1855	ENSMUSG00000019782	Rwdd1	0.189338	0.504952	9.85333	10.0791	10.0693	10.0023	9.81709	9.59966
1856	ENSMUSG00000019787	Trdn	-6.92098	0.0387794	3.64305	2	2	7.88873	8.4468	8.84907
1857	ENSMUSG00000019789	Hey2	-3.54782	2.46081e-05	7.17598	7.28805	6.82089	10.8648	10.3883	10.5593
1858	ENSMUSG00000019790	Stxbp5	0.571911	0.0726316	9.23656	9.35131	9.21798	8.5142	8.67233	8.89506
1859	ENSMUSG00000019791	Hint3	-0.357102	0.590867	7.78818	6.89713	7.43888	7.92673	7.90791	7.42055
1860	ENSMUSG00000019792	Trmt11	0.00357479	0.99874	7.42603	7.41725	7.74021	7.40534	7.28787	7.83974
1861	ENSMUSG00000019794	Katna1	0.570028	0.0351093	9.3824	9.91375	9.58158	9.14449	9.00749	9.07368
1862	ENSMUSG00000019795	Pcmt1	-0.539933	0.000838587	11	11.0548	11.3002	11.8037	11.6352	11.5377
1863	ENSMUSG00000019796	Lrp11	-1.61813	6.37587e-05	7.35296	7.12609	7.08298	8.73017	8.34936	9.1591
1864	ENSMUSG00000019797	Mtres1	-0.949379	0.00606292	8.70503	8.27402	9.13828	9.85236	9.68171	9.51774
1865	ENSMUSG00000019802	Sec63	0.487038	0.0761357	10.5193	10.9275	10.8194	10.1149	10.1099	10.565
1866	ENSMUSG00000019804	Snx3	-1.02945	3.3269e-14	11.9291	12.0273	11.8826	12.9691	13.0653	12.8893
1867	ENSMUSG00000019806	Aig1	-0.584946	0.0855667	8.82095	8.24182	8.93666	9.24818	9.31021	9.27031
1868	ENSMUSG00000019808	Adat2	0.115459	0.818183	8.23935	8.30552	8.31346	8.10303	8.28853	8.11835
1869	ENSMUSG00000019809	Pex3	-0.362986	0.565509	7.75705	7.73407	8.35584	8.55925	8.22502	8.1939
1870	ENSMUSG00000019810	Fuca2	-0.617406	0.0502627	8.79972	8.90804	8.63499	9.32844	9.30785	9.54685
1871	ENSMUSG00000019813	Cep57l1	0.541558	0.244169	8.02089	8.17517	8.73871	7.93918	7.89541	7.5717
1872	ENSMUSG00000019814	Ltv1	-0.272146	0.205544	10.5613	10.8037	10.8958	11.0405	11.0696	10.9836
1873	ENSMUSG00000019817	Plagl1	0.297616	0.668381	13.1578	13.5153	13.1878	12.8005	12.7783	13.3437
1874	ENSMUSG00000019818	Cd164	0.30562	0.191578	12.0728	12.402	11.9537	11.6946	11.7598	12.0683
1875	ENSMUSG00000019820	Utrn	-0.382067	0.124505	10.9582	11.3853	10.8382	11.1549	11.562	11.6249
1876	ENSMUSG00000019822	Smpd2	-0.408757	0.110611	10.0639	10.066	9.92374	10.3346	10.5888	10.3429
1877	ENSMUSG00000019823	Mical1	1.05356	2.25998e-11	11.7165	11.6735	11.8197	10.7564	10.8459	10.4225
1878	ENSMUSG00000019826	Zbtb24	0.551072	0.131925	9.02288	8.62737	8.78984	8.33739	8.52596	7.90114
1879	ENSMUSG00000019828	Grm1	5.41053	0.0700565	4.68394	2	2.67147	2	2	2
1880	ENSMUSG00000019831	Wasf1	0.624462	0.00169269	10.783	10.7426	10.7093	10.0872	10.1927	10.0856
1881	ENSMUSG00000019832	Rab32	3.54915	9.20837e-34	10.5532	10.4771	10.4208	6.90655	7.4159	6.45385
1882	ENSMUSG00000019836	Amd-ps4	-0.0453899	0.98489	4.02393	4.77761	4.09079	4.52213	4.03826	4.51873
1883	ENSMUSG00000019837	Gtf3c6	0.647366	0.000181093	10.5899	10.7823	10.7897	10.0816	10.0019	10.1465
1884	ENSMUSG00000019838	Slc16a10	-2.11172	3.82445e-13	8.32675	7.55843	8.39192	10.2732	10.0785	10.3362
1885	ENSMUSG00000019841	Rev3l	0.486532	0.303504	9.40467	9.62184	9.8329	8.66795	9.19254	9.46789
1886	ENSMUSG00000019842	Traf3ip2	0.986281	0.00135173	8.85956	9.25779	9.06673	8.24014	8.16381	7.85223
1887	ENSMUSG00000019843	Fyn	0.980541	1.74821e-11	11.3243	11.3736	11.36	10.4391	10.444	10.2302
1888	ENSMUSG00000019845	Tube1	0.0979682	0.836162	9.13851	8.93706	8.97795	9.19467	8.82512	8.70501
1889	ENSMUSG00000019846	Lama4	-4.7621	3.45237e-77	8.45255	8.66255	8.39701	13.1851	13.2579	13.3211
1890	ENSMUSG00000019848	Popdc3	-0.635364	0.451785	7.84849	8.37928	8.16645	8.94291	8.70851	8.65954
1891	ENSMUSG00000019849	Prep	0.0532516	0.832229	12.4777	12.2218	12.0557	12.1851	12.2046	12.2376
1892	ENSMUSG00000019850	Tnfaip3	-2.97589	4.30891e-06	6.39594	3.97401	5.92834	8.37911	8.40773	8.99419
1893	ENSMUSG00000019851	Perp	-1.775	5.98144e-05	8.14631	8.43731	7.70786	9.8408	9.64299	10.1388
1894	ENSMUSG00000019852	Arfgef3	-2.15456	0.377852	3.7481	2	3.31135	4.22959	4.68664	5.16472
1895	ENSMUSG00000019853	Hebp2	-1.56849	0.191191	6.50489	5.94475	6.31949	7.71864	7.62717	8.00547
1896	ENSMUSG00000019854	Reps1	-0.140184	0.480599	11.1932	11.1144	11.3124	11.3621	11.3749	11.3082
1897	ENSMUSG00000019856	Fam184a	3.0557	1.25067e-05	7.28475	8.10529	7.31547	5.06695	5.29345	3.16668
1898	ENSMUSG00000019857	Asf1a	0.456998	0.198478	8.94767	8.99618	9.44595	8.55925	8.55804	8.93083
1899	ENSMUSG00000019861	Gopc	0.55115	0.103724	9.70464	10.285	9.88266	9.23562	9.34968	9.66837
1900	ENSMUSG00000019863	Qrsl1	-1.05148	0.00793555	8.57184	7.69382	9.01147	9.67951	9.53029	9.478
1901	ENSMUSG00000019864	Rtn4ip1	-1.51105	1.25481e-08	8.84779	8.48526	9.11995	10.4058	10.1876	10.4225
1902	ENSMUSG00000019866	Crybg1	2.07723	0.0739591	5.82897	6.50591	6.06233	4.14614	3.84381	4.80234
1903	ENSMUSG00000019868	Vta1	-0.601158	0.00699475	9.498	9.67104	9.53393	9.94477	10.1274	10.3961
1904	ENSMUSG00000019872	Smpdl3a	-1.07924	0.0539896	6.13045	6.69449	6.6945	7.28371	7.6571	7.74245
1905	ENSMUSG00000019873	Reep3	-0.216502	0.629254	9.60151	10.1328	9.27706	9.7659	9.77165	10.2073
1906	ENSMUSG00000019874	Fabp7	6.95649	0.0165248	4.32498	2	5.87105	2	2	2
1907	ENSMUSG00000019877	Serinc1	0.301423	0.148825	11.4816	11.9497	11.8049	11.2777	11.5214	11.5569
1908	ENSMUSG00000019878	Hsf2	0.0652225	0.891539	9.43054	9.96819	9.66821	9.71614	9.47046	9.7221
1909	ENSMUSG00000019880	Rspo3	-2.26503	9.14044e-06	5.85272	5.49186	6.71092	8.04086	8.25957	8.56407
1910	ENSMUSG00000019883	Echdc1	-0.240122	0.836881	6.05054	4.67108	7.04463	6.30112	6.47473	6.54899
1911	ENSMUSG00000019889	Ptprk	0.512562	0.00167329	11.1119	11.3731	11.0762	10.5679	10.7415	10.7297
1912	ENSMUSG00000019890	Nts	-4.46022	0.154826	2	2	2	3.21279	3.49196	2
1913	ENSMUSG00000019891	Dcbld1	0.758149	0.00388312	9.10181	9.26467	9.26876	8.45041	8.5219	8.41207
1914	ENSMUSG00000019893	Ros1	0.931035	0.857349	2.7721	2	3.47409	2.33751	3.02562	2
1915	ENSMUSG00000019894	Slc6a15	2.31849	0.306382	4.68394	5.72273	5.07188	2	2.82934	4.38758
1916	ENSMUSG00000019897	Ccdc59	0.260259	0.479453	9.27442	9.32081	9.84411	9.5021	9.27446	8.89204
1917	ENSMUSG00000019899	Lama2	0.29988	0.582196	8.60018	8.60584	8.80138	7.7822	9.04192	7.96003
1918	ENSMUSG00000019900	Rfx6	0	#N/A	2	2	2	2	2	2
1919	ENSMUSG00000019906	Lin7a	-0.712498	#N/A	3.27232	2	2	2	3.73579	2
1920	ENSMUSG00000019907	Ppp1r12a	1.30047	9.96237e-12	12.2679	12.3989	12.328	10.8401	10.9976	11.2355
1921	ENSMUSG00000019916	P4ha1	0.915085	3.73975e-09	12.0389	12.4377	12.3329	11.2813	11.4203	11.3908
1922	ENSMUSG00000019917	Septin10	0.866422	0.00445225	10.2181	10.8241	10.1377	9.49368	9.43851	9.74237
1923	ENSMUSG00000019920	Lims1	0.328481	0.182631	10.7946	10.8495	10.7113	10.3381	10.3994	10.6226
1924	ENSMUSG00000019923	Zwint	-0.0822575	0.676024	12.5135	12.6012	12.6159	12.6861	12.7194	12.5695
1925	ENSMUSG00000019927	Ube2d1	0.152016	0.493047	10.8743	11.1588	10.9838	10.7091	10.974	10.8806
1926	ENSMUSG00000019929	Dcn	4.19987	1.03035e-08	8.67203	9.08443	9.56136	4.22959	6.25754	3.16668
1927	ENSMUSG00000019942	Cdk1	-0.144643	0.468917	12.482	12.1055	12.2518	12.5828	12.2895	12.4109
1928	ENSMUSG00000019943	Atp2b1	1.44099	7.62258e-07	11.8761	12.516	11.9157	10.39	10.6773	10.9607
1929	ENSMUSG00000019944	Rhobtb1	0.358233	0.250434	10.2284	10.4918	10.124	9.85893	9.74925	10.1591
1930	ENSMUSG00000019945	Cabcoco1	-5.59078	0.000848904	3.12405	2	2	6.13791	6.04767	6.77572
1931	ENSMUSG00000019947	Arid5b	0.891536	0.000138224	10.6673	10.7743	10.5677	9.51671	9.71766	10.0629
1932	ENSMUSG00000019948	Actr6	0.00715323	0.995518	7.44178	7.70061	7.79514	7.5008	7.59662	7.8208
1933	ENSMUSG00000019951	Uhrf1bp1l	0.536797	0.0650242	9.41866	10.0139	9.62771	9.17376	8.9929	9.33626
1934	ENSMUSG00000019952	Poc1b	0.535434	0.0679788	9.37831	9.59113	9.62121	8.75854	9.1192	9.1001
1935	ENSMUSG00000019960	Dusp6	0.320393	0.130923	10.967	11.2437	10.9505	10.6582	10.67	10.8821
1936	ENSMUSG00000019961	Tmpo	0.670149	4.94559e-07	13.4734	13.6807	13.4295	12.8545	12.8208	12.91
1937	ENSMUSG00000019966	Kitl	2.13761	6.95672e-17	11.0086	10.8639	11.0254	8.35608	8.77483	9.24921
1938	ENSMUSG00000019969	Psen1	0.0170855	0.950179	11.5504	11.6842	11.4317	11.505	11.5173	11.6024
1939	ENSMUSG00000019970	Sgk1	0.893958	1.40218e-05	10.3408	10.5399	10.6132	9.72335	9.65601	9.44126
1940	ENSMUSG00000019971	Cep290	0.417494	0.836162	5.96595	5.29068	6.25377	5.02085	5.88017	5.48652
1941	ENSMUSG00000019975	Ikbip	0.329757	0.372439	8.95318	8.99342	9.15637	8.38367	8.6613	9.01378
1942	ENSMUSG00000019977	Hbs1l	0.154215	0.596199	10.7215	10.7483	10.9487	10.5639	10.4494	10.9123
1943	ENSMUSG00000019978	Epb41l2	0.622809	1.01085e-05	12.4686	12.6655	12.5082	11.8045	11.9211	12.0471
1944	ENSMUSG00000019979	Apaf1	0.472261	0.0443481	10.7085	10.9618	10.6434	10.1421	10.3804	10.3854
1945	ENSMUSG00000019982	Myb	1.50718	0.382104	4.57392	5.94475	4.91066	3.96321	4.851	2
1946	ENSMUSG00000019984	Med23	0.217923	0.43413	10.8098	11.2191	10.9582	10.6006	10.9024	10.8443
1947	ENSMUSG00000019986	Ahi1	1.02967	0.000380662	9.09436	9.19909	9.0015	8.23004	8.16381	7.8208
1948	ENSMUSG00000019987	Arg1	3.68319	0.00142319	7.23139	7.80506	6.89461	3.96321	4.90187	2
1949	ENSMUSG00000019988	Nedd1	0.601143	0.0445564	9.59096	9.78238	9.47267	8.78636	8.90834	9.32061
1950	ENSMUSG00000019989	Enpp3	-0.0484532	0.988801	5.6234	4.55605	6.36169	5.46149	5.13237	6.33429
1951	ENSMUSG00000019990	Pde7b	1.34051	0.176187	6.8499	7.5434	6.88016	4.97322	5.85458	6.38674
1952	ENSMUSG00000019992	Mtfr2	-0.47279	0.228586	8.35613	7.84848	8.54628	8.82041	8.81188	8.59412
1953	ENSMUSG00000019996	Map7	-0.546917	0.440259	5.92172	5.46022	6.42277	6.61223	6.27694	6.5943
1954	ENSMUSG00000019997	Ccn2	-1.23684	0.000496923	9.31773	9.43914	9.36786	10.4801	10.5203	10.8007
1955	ENSMUSG00000019998	Stx7	0.209195	0.379812	10.6074	10.437	10.6647	10.3381	10.2842	10.4638
1956	ENSMUSG00000020000	Moxd1	1.18306	0.594593	4.78616	2	4.18782	3.36817	3.84381	2
1957	ENSMUSG00000020003	Pex7	-1.12469	0.000147714	8.51343	7.90245	8.54628	9.48734	9.24027	9.63623
1958	ENSMUSG00000020009	Ifngr1	0.0133046	0.982435	8.63826	8.97674	8.87243	9.11462	8.43821	8.83655
1959	ENSMUSG00000020014	Cfap54	-1.25632	0.724277	4.18229	2	3.47409	4.05757	3.61902	5.0823
1960	ENSMUSG00000020015	Cdk17	-0.124418	0.84306	9.34939	9.92393	9.41121	9.69611	9.63361	9.79346
1961	ENSMUSG00000020017	Hal	2.0314	0.557402	4.18229	2	3.47409	2.61084	2.82934	2
1962	ENSMUSG00000020018	Snrpf	0.13168	0.492151	11.5182	11.4263	11.4067	11.3896	11.1915	11.3703
1963	ENSMUSG00000020019	Ntn4	-0.676283	0.848561	4.83467	2	3.87465	4.64879	5.29345	2
1964	ENSMUSG00000020020	Usp44	-1.35799	0.476433	3.12405	4.82807	4.52144	5.79857	4.56565	5.80192
1965	ENSMUSG00000020021	Fgd6	-1.11633	0.00115377	7.67948	7.53584	7.58854	8.56328	8.53807	8.96574
1966	ENSMUSG00000020022	Ndufa12	-0.543869	0.00205563	11.2619	11.009	11.194	11.8105	11.7258	11.5583
1967	ENSMUSG00000020023	Tmcc3	1.15754	1.00617e-05	10.1962	10.5084	10.2131	8.81028	9.13789	9.46179
1968	ENSMUSG00000020024	Cep83	0.328747	0.320797	9.09187	9.19429	9.40617	9.04434	8.58163	9.05489
1969	ENSMUSG00000020027	Socs2	2.49212	1.07999e-12	9.45209	10.007	9.74794	7.42317	7.23925	7.20376
1970	ENSMUSG00000020029	Nudt4	0.316666	0.0920366	11.4585	11.4696	11.8844	11.3873	11.243	11.2703
1971	ENSMUSG00000020032	Nuak1	0.0863508	0.846529	10.161	10.3832	9.58158	10.0082	10.0393	9.93375
1972	ENSMUSG00000020034	Tcp11l2	-2.26146	0.0113175	5.31684	3.67646	5.87105	6.94409	7.38047	7.61632
1973	ENSMUSG00000020037	Rfx4	1.09865	0.799938	3.52974	2	2.91765	2.33751	3.02562	2
1974	ENSMUSG00000020038	Cry1	0.222715	0.505185	10.1799	9.70181	9.73395	9.61114	9.89449	9.46382
1975	ENSMUSG00000020042	Btbd11	-0.639711	0.436814	6.05054	5.46022	6.34074	6.2817	6.76313	6.70862
1976	ENSMUSG00000020044	Timp3	-0.920285	0.0363393	9.08687	9.53338	7.90624	9.82075	9.67989	10.1703
1977	ENSMUSG00000020048	Hsp90b1	0.538201	0.0148398	13.4646	14.3916	13.9691	13.3541	13.5639	13.4319
1978	ENSMUSG00000020051	Pah	0	1	2	2	2	2	2	2
1979	ENSMUSG00000020052	Ascl1	0.131846	0.964192	4.45481	2	4.09079	2	3.61902	4.58009
1980	ENSMUSG00000020053	Igf1	-1.32897	0.0194402	7.20395	6.58138	7.26077	7.88229	8.11074	8.86148
1981	ENSMUSG00000020056	Washc3	-0.221973	0.554974	8.54293	8.87242	8.63928	9.01524	8.80521	8.90709
1982	ENSMUSG00000020057	Dram1	0.125596	0.974625	3.40676	2	3.47409	3.50843	3.19836	2
1983	ENSMUSG00000020063	Sirt1	0.892475	0.00975042	9.4579	9.90936	9.40617	8.54303	8.56988	9.00821
1984	ENSMUSG00000020064	Herc4	0.55587	0.0083368	9.8266	10.0581	10.0961	9.39773	9.50583	9.42881
1985	ENSMUSG00000020067	Mypn	-10.3476	1.27393e-10	2	2	2	7.98192	8.25468	7.6016
1986	ENSMUSG00000020069	Hnrnph3	0.637854	0.00992229	10.7652	10.9835	10.9392	10.1475	10.176	10.4454
1987	ENSMUSG00000020070	Rufy2	0.248252	0.683032	8.35197	8.76322	7.93448	7.90785	8.09443	8.39082
1988	ENSMUSG00000020072	Pbld2	3.31457	0.271496	4.45481	2	5.26214	3.21279	2	2
1989	ENSMUSG00000020074	Ccar1	0.591089	0.0537522	10.5685	10.9005	10.9444	9.96317	10.0492	10.5801
1990	ENSMUSG00000020075	Ddx21	0.486376	0.00140327	12.5514	13.0248	12.7023	12.2106	12.3052	12.3426
1991	ENSMUSG00000020076	Ddx50	0.347567	0.110588	10.016	10.2204	10.3133	9.74833	9.8466	9.92491
1992	ENSMUSG00000020077	Srgn	0.706432	0.767088	4.68394	5.17849	4.44499	3.75367	4.28817	4.51873
1993	ENSMUSG00000020078	Vps26a	0.0746689	0.811495	9.90537	10.2816	10.187	10.1767	10.0421	9.94837
1994	ENSMUSG00000020079	Supv3l1	-0.747476	0.000516181	10.4084	10.4186	10.3478	11.1436	11.1838	11.0843
1995	ENSMUSG00000020080	Hkdc1	-1.97511	0.000108902	5.31684	7.47381	6.20824	8.57927	8.55407	8.46589
1996	ENSMUSG00000020083	Fam241b	0.567212	0.377853	6.62009	7.43364	6.7432	6.30112	6.44073	6.54899
1997	ENSMUSG00000020085	Aifm2	-1.20259	5.79114e-05	7.99444	7.85458	8.17239	9.11736	9.24767	9.23736
[truncated: 17,048 more rows]
